# Supplementary material for: Transcriptional profiling reveals extraordinary diversity among skeletal muscle tissues
Source: eLife. 2018 May 29;7:e34613. doi: 10.7554/eLife.34613 (PMC6008051; doi:10.7554/eLife.34613)
Supplement: Figure 2—source data 1. — Genes differentially expressed among skeletal muscles were identified for every pairwise comparison (q < 0.01; FC > 2; max = 3,000). These gene lists were analyzed for Gene Ontology enrichment (Huang et al., 2009a). This figure displays a group of related tables summarizing these results. For every skeletal muscle tissue, the most common enriched gene ontologies for up- and down-regulated genes are shown, along with the number and identity of tissues in which the constituent genes are differentially expressed. Key structural components of the sarcomere were among the most commonly observed differential gene ontology terms, including ‘Z disc’, ‘actin binding’, ‘M band’, and ‘myosin complex’. Additionally, ontology terms related to extracellular proteins such as collagen, integrin, and fibronectin were enriched in these data. TON = tongue, FDB = flexor digitorum brevis, SOL = soleus, EYE = extraocular eye muscles, DIA = diaphragm, EDL = extensor digitorum longus, PLA = plantaris, TAN = tibialis anterior, GAS = gastrocnemius, MAS = masseter, QUAD = quadriceps. [file elife-34613-fig2-data1.xlsx]

## Sheet: Sheet1
TON				FDB				SOL				EYE				DIA				EDL				PLA				MAS				TAN				GAS				QUAD
Top enriched GO terms in upregulated genes		Top enriched GO terms in downregulated genes		Top enriched GO terms in upregulated genes		Top enriched GO terms in downregulated genes		Top enriched GO terms in upregulated genes		Top enriched GO terms in downregulated genes		Top enriched GO terms in upregulated genes		Top enriched GO terms in downregulated genes		Top enriched GO terms in upregulated genes		Top enriched GO terms in downregulated genes		Top enriched GO terms in upregulated genes		Top enriched GO terms in downregulated genes		Top enriched GO terms in upregulated genes		Top enriched GO terms in downregulated genes		Top enriched GO terms in upregulated genes		Top enriched GO terms in downregulated genes		Top enriched GO terms in upregulated genes		Top enriched GO terms in downregulated genes		Top enriched GO terms in upregulated genes		Top enriched GO terms in downregulated genes		Top enriched GO terms in upregulated genes		Top enriched GO terms in downregulated genes
GO term	number and names of differentailly enriched tissues	GO term	number and names of differentailly enriched tissues	GO term	number and names of differentailly enriched tissues	GO term	number and names of differentailly enriched tissues	GO term	number and names of differentailly enriched tissues	GO term	number and names of differentailly enriched tissues	GO term	number and names of differentailly enriched tissues	GO term	number and names of differentailly enriched tissues	GO term	number and names of differentailly enriched tissues	GO term	number and names of differentailly enriched tissues	GO term	number and names of differentailly enriched tissues	GO term	number and names of differentailly enriched tissues	GO term	number and names of differentailly enriched tissues	GO term	number and names of differentailly enriched tissues	GO term	number and names of differentailly enriched tissues	GO term	number and names of differentailly enriched tissues	GO term	number and names of differentailly enriched tissues	GO term	number and names of differentailly enriched tissues	GO term	number and names of differentailly enriched tissues	GO term	number and names of differentailly enriched tissues	GO term	number and names of differentailly enriched tissues	GO term	number and names of differentailly enriched tissues
GO:0005198~structural molecule activity	10	GO:0030018~Z disc	10	GO:0005604~basement membrane	10	GO:0005743~mitochondrial inner membrane	9	GO:0030016~myofibril	9	GO:0030018~Z disc	4	GO:0016459~myosin complex	8	GO:0009952~anterior/posterior pattern specification	7	GO:0006631~fatty acid metabolic process	6	GO:0030018~Z disc	7	GO:0030016~myofibril	7	GO:0030593~neutrophil chemotaxis	4	GO:0030018~Z disc	5	GO:0007156~homophilic cell adhesion via plasma membrane adhesion molecules	4	GO:0005576~extracellular region	4	GO:0009952~anterior/posterior pattern specification	7	GO:0030018~Z disc	4	GO:0005578~proteinaceous extracellular matrix	6	GO:0030018~Z disc	3	GO:0030864~cortical actin cytoskeleton	4	GO:0009952~anterior/posterior pattern specification	2	GO:0016459~myosin complex	6
	DIA, EDL, EYE, FDB, GAS, MAS, PLA, QUAD, SOL, TAN		DIA, EDL, EYE, FDB, GAS, MAS, PLA, QUAD, SOL, TAN		DIA, EDL, EYE, GAS, MAS,PLA, QUAD, SOL, TAN, TON		DIA, EDL, EYE, GAS, MAS,PLA, QUAD, SOL, TAN		DIA, EYE, FDB, GAS, MAS, PLA, QUAD, TAN, TON		EDL, MAS, PLA, TAN		DIA, GAS, MAS, PLA, QUAD, SOL, TAN, TON		DIA, EDL, GAS, PLA, QUAD, SOL, TAN		EDL, FDB, MAS,PLA, TAN, TON		EDL, FDB, GAS,MAS, PLA, SOL, TAN		DIA, EYE, FDB, MAS, QUAD, TAN, TON		DIA, EYE, FDB, TON		DIA, EYE, QUAD, SOL, TON		DIA, EYE, FDB, TON		EDL, GAS, PLA, TAN		DIA, EDL, GAS, PLA, QUAD, SOL, TAN		DIA, EYE, SOL, TON		DIA, EYE, FDB, PLA, QUAD, SOL		DIA, EYE, TON		EYE, FDB, SOL, TON		EYE, MAS		DIA, EDL, EYE, FDB, PLA, SOL
GO:0008544~epidermis development	10	GO:0016529~sarcoplasmic reticulum	9	GO:0005578~proteinaceous extracellular matrix	9	GO:0005759~mitochondrial matrix	8	GO:0030018~Z disc	9	GO:0005975~carbohydrate metabolic process	4	GO:0001725~stress fiber	7	GO:0030018~Z disc	7	GO:0050873~brown fat cell differentiation	6	GO:0030016~myofibril	5	GO:0030018~Z disc	5	GO:0072562~blood microparticle	4	GO:0030016~myofibril	5	GO:0001725~stress fiber	4	GO:0030018~Z disc	4	GO:0009954~proximal/distal pattern formation	7	GO:0005977~glycogen metabolic process	3	GO:0005604~basement membrane	4	GO:0009954~proximal/distal pattern formation	3	GO:0001725~stress fiber	3	GO:0004842~ubiquitin-protein transferase activity	2	GO:0001725~stress fiber	6
	DIA, EDL, EYE, FDB, GAS, MAS, PLA, QUAD, SOL, TAN		DIA, EDL, EYE, FDB, GAS, MAS, PLA, SOL, TAN		DIA, EDL, EYE, GAS, MAS,PLA, QUAD, SOL, TAN		DIA, EDL, EYE, GAS, PLA, QUAD, SOL, TAN		DIA, EDL, EYE, GAS, MAS, PLA, QUAD, TAN, TON		EDL, GAS, PLA, TAN		EDL, GAS, MAS, PLA, QUAD, TAN, TON		EDL, FDB, GAS, MAS, PLA, SOL, TAN		EDL, FDB, MAS,PLA, TAN, TON		EDL, EYE, FDB, PLA, SOL		DIA, EYE, MAS, SOL, TON		DIA, EYE, FDB, QUAD		DIA, EYE, MAS, QUAD, TON		DIA, EYE, FDB, SOL		DIA, EYE, SOL, TON		EDL, FDB, GAS, PLA, QUAD, SOL, TAN		EYE, FDB, SOL		DIA, EYE, FDB, SOL		DIA, EYE, MAS		EYE, FDB, SOL		EYE, TON		DIA, EDL, EYE, FDB, PLA, SOL
GO:0005882~intermediate filament	10	GO:0006936~muscle contraction	9	GO:0031012~extracellular matrix	9	GO:0006631~fatty acid metabolic process	8	GO:0003779~actin binding	8	GO:0005578~proteinaceous extracellular matrix	4	GO:0030336~negative regulation of cell migration	7	GO:0036459~thiol-dependent ubiquitinyl hydrolase activity	6	GO:0052697~xenobiotic glucuronidation	6	GO:0016459~myosin complex	3	GO:0016529~sarcoplasmic reticulum	4	GO:0032587~ruffle membrane	3	GO:0006936~muscle contraction	3	GO:0030175~filopodium	4	GO:0005615~extracellular space	3	GO:0030016~myofibril	7	GO:0009952~anterior/posterior pattern specification	2	GO:0001725~stress fiber	4	GO:0005977~glycogen metabolic process	3	GO:0007156~homophilic cell adhesion via plasma membrane adhesion molecules	3	GO:0006511~ubiquitin-dependent protein catabolic process	2	GO:0031594~neuromuscular junction	5
	DIA, EDL, EYE, FDB, GAS, MAS, PLA, QUAD, SOL, TAN		DIA, EDL, EYE, FDB, GAS, MAS, PLA, SOL, TAN		DIA, EDL, EYE, GAS, MAS,PLA, QUAD, SOL, TAN		DIA, EDL, EYE, GAS, PLA, QUAD, SOL, TAN		DIA, EDL, EYE, GAS, MAS, PLA, TAN, TON		DIA, EYE, FDB, PLA		EDL, GAS, MAS, PLA, QUA, SOL, TAN		GAS, MAS, PLA, QUAD, SOL, TAN		EDL, FDB, MAS,PLA, TAN, TON		EDL, EYE, SOL		EYE, QUAD, SOL, TON		DIA, EYE, TON		EYE, GAS, TON		DIA, EYE, FDB, SOL		EDL, GAS, TAN		DIA, EDL, EYE, FDB, GAS, PLA, SOL		EYE, MAS		DIA, EYE, FDB, SOL		FDB, SOL, TON		EYE, FDB, TON		EYE, TON		EDL, EYE, FDB, PLA, SOL
GO:0045095~keratin filament	10	GO:0042383~sarcolemma	8	GO:0008201~heparin binding	9	GO:0031966~mitochondrial membrane	8	GO:0031430~M band	8			GO:0007156~homophilic cell adhesion via plasma membrane adhesion molecules	7	GO:0004842~ubiquitin-protein transferase activity	5	GO:0001725~stress fiber	6	GO:0005578~proteinaceous extracellular matrix	2	GO:0008076~voltage-gated potassium channel complex	4	GO:0001725~stress fiber	3	GO:0005977~glycogen metabolic process	3	GO:0071944~cell periphery	4	GO:0030016~myofibril	2	GO:0060048~cardiac muscle contraction	6	GO:0004842~ubiquitin-protein transferase activity	2	GO:0030016~myofibril	4	GO:0009952~anterior/posterior pattern specification	2	GO:0016459~myosin complex	3	GO:0042787~protein ubiquitination involved in ubiquitin-dependent protein catabolic process	2	GO:0005089~Rho guanyl-nucleotide exchange factor activity	5
	DIA, EDL, EYE, FDB, GAS, MAS, PLA, QUAD, SOL, TAN		DIA, EDL, EYE, FDB, MAS, PLA, SOL, TAN		DIA, EDL, EYE, GAS, MAS,PLA, QUAD, SOL, TAN		DIA, EDL, EYE, GAS, PLA, QUAD, SOL, TAN		EDL, EYE, GAS, MAS, PLA, QUAD, TAN, TON				EDL, GAS, MAS,PLA, QUAD, SOL, TAN		GASD, MAS, PLA, QUAD, TAN		EDL, MAS,PLA, QUAD, TAN, TON		EYE, FDB		DIA, EYE, SOL, TON		DIA, EYE, SOL		FDB, SOL, TON		DIA, EYE, FDB, TON		SOL, TON		EDL, FDB, GAS, PLA, QUAD, SOL		EYE, TON		EDL, EYE, FDB, SOL		EYE, MAS		EYE, FDB, SOL		EYE, TON		DIA, EYE, MAS, SOL, TON
GO:0030057~desmosome	10	GO:0030016~myofibril	8	GO:0005581~collagen trimer	8	GO:0005739~mitochondrion	7	GO:0031672~A band	7			GO:0030864~cortical actin cytoskeleton	6	GO:0030315~T-tubule	4	GO:0072562~blood microparticle	5	GO:0016529~sarcoplasmic reticulum	2	GO:0030315~T-tubule	4	GO:0045766~positive regulation of angiogenesis	3	GO:0005578~proteinaceous extracellular matrix	3	GO:0016459~myosin complex	4	GO:0004842~ubiquitin-protein transferase activity	2	GO:0001501~skeletal system development	6					GO:0004842~ubiquitin-protein transferase activity	2	GO:0030863~cortical cytoskeleton	3	GO:0061630~ubiquitin protein ligase activity	2	GO:0051015~actin filament binding	4
	DIA, EDL, EYE, FDB, GAS, MAS, PLA, QUAD, SOL, TAN		DIA, EDL, EYE, FDB, MAS, PLA, SOL, TAN		DIA, EDL, GAS, MAS,PLA, QUAD, SOL, TAN		DIA, EDL, GAS, PLA, QUAD, SOL, TAN		DIA, EDL, EYE, MAS, PLA, QUAD, TAN				EDL, GAS, MAS, PLA, QUAD, TAN		EDL, FDB, MAS, PLA		EDL, EYE, PLA, SOL, TAN		EDL, PLA		DIA, EYE, SOL, TON		DIA, EYE, FDB		EDL, SOL, TAN		DIA, EYE, FDB, SOL		EYE, TON		EDL, FDB, GAS, PLA, QUAD, TAN						EYE, TON		EYE, FDB, SOL		EYE, TON		DIA, EYE, FDB, SOL
GO:0030216~keratinocyte differentiation	10	GO:0007519~skeletal muscle tissue development	8	GO:0005518~collagen binding	8	GO:0055114~oxidation-reduction process	7	GO:0016459~myosin complex	7			GO:0030175~filopodium	6	GO:0030016~myofibril	4	GO:0042613~MHC class II protein complex	5	GO:0008076~voltage-gated potassium channel complex	2	GO:0042383~sarcolemma	4	GO:0005581~collagen trimer	3			GO:0030864~cortical actin cytoskeleton	3			GO:0055010~ventricular cardiac muscle tissue morphogenesis	6					GO:0006511~ubiquitin-dependent protein catabolic process	2			GO:0000151~ubiquitin ligase complex	2	GO:0030898~actin-dependent ATPase activity	4
	DIA, EDL, EYE, FDB, GAS, MAS, PLA, QUAD, SOL, TAN		EDL, EYE, FDB, GAS, MAS, PLA, SOL, TAN		DIA, EDL, GAS, MAS,PLA, QUAD, SOL, TAN		DIA, EDL, EYE, GAS, PLA, SOL, TAN		DIA, FDB, GAS, MAS, PLA, QUAD, TAN				EDL, GAS, MAS, PLA, QUAD, TAN		EDL, FDB, PLA, SOL		EDL, FDB, PLA, SOL, TAN		EDL, EYE		DIA, EYE, SOL, TON		DIA, EYE, FDB				DIA, EYE, FDB				EDL, FDB, GAS, PLA, QUAD, SOL						EYE, TON				EDL, TON		DIA, EYE, FDB, SOL
GO:0031424~keratinization	10	GO:0042787~protein ubiquitination involved in ubiquitin-dependent protein catabolic process	7	GO:0001968~fibronectin binding	8	GO:0008152~metabolic process	7	GO:0001725~stress fiber	7			GO:0031594~neuromuscular junction	5	GO:0007519~skeletal muscle tissue development	4	GO:0005581~collagen trimer	5	GO:0032982~myosin filament	2	GO:0030017~sarcomere	4	GO:0005178~integrin binding	3			GO:0031527~filopodium membrane	3									GO:0007519~skeletal muscle tissue development	2			GO:0008234~cysteine-type peptidase activity	2	GO:0035023~regulation of Rho protein signal transduction	4
	DIA, EDL, EYE, FDB, GAS, MAS, PLA, QUAD, SOL, TAN		EDL, FDB, GAS, PLA, QUAD, SOL, TAN		DIA, EDL, EYE, GAS, MAS,PLA, SOL, TAN		DIA, EDL, GAS, MAS, PLA, SOL, TAN		EDL, GAS, MAS, PLA, QUAD, TAN, TON				DIA, GAS, MAS, QUAD, SOL		EDL, GAS, PLA, QUAD		EDL, MAS, PLA, SOL, TAN		EDL, EYE		EYE, FDB, MAS, TON		DIA, EYE, FDB				DIA, EYE, FDB										EYE, TON				EYE, TON		DIA, EYE, MAS, TON
				GO:0005178~integrin binding	8	GO:0003824~catalytic activity	7					GO:0005605~basal lamina	5	GO:0008234~cysteine-type peptidase activity	4	GO:0030336~negative regulation of cell migration	5	GO:0042383~sarcolemma	2	GO:0033017~sarcoplasmic reticulum membrane	4	GO:0009617~response to bacterium	3																			GO:0030864~cortical actin cytoskeleton	4
					DIA, EDL, GAS, MAS,PLA, QUAD, SOL, TAN		DIA, EDL, GAS, MAS,PLA, SOL, TAN						GAS, MAS, PLA, QUAD, TAN		GAS, PLA, QUAD, SOL		EDL, MAS, PLA, SOL, TAN		EDL, FDB		EYE, QUAD, SOL, TON		DIA, EYE, TON																				DIA, EYE, FDB, TON
																GO:0045766~positive regulation of angiogenesis	5					GO:0008201~heparin binding	3
																	EDL, MAS, PLA, SOL, TAN						DIA, FDB, PIA
																GO:0006635~fatty acid beta-oxidation	5					GO:0005604~basement membrane	3
																	EDL, FDB, MAS, TAN, TON						DIA, FDB, SOL
																						GO:0032760~positive regulation of tumor necrosis factor production	3
																							DIA, FDB, TON
