# Supplementary material for: Transcriptional profiling reveals extraordinary diversity among skeletal muscle tissues
Source: eLife journal article supplement (doi:10.7554/elife.34613), 2018-05-29
Supplement: supp [file elife-34613-supp-v1.zip]

Archive with 24 entries (24 files):
- elife_poa_e34613_Figure_1_figure_supplement_2.pdf
- elife_poa_e34613_Figure_2_figure_supplement_1.pdf
- elife_poa_e34613_Figure_1_figure_supplement_4.pdf
- elife_poa_e34613_Supplementary_file_10.xlsx
- elife_poa_e34613_Figure_7_figure_supplement_2.pdf
- elife_poa_e34613_Transparent_Reporting_File.docx
- elife_poa_e34613_Supplementary_file_2.xlsx
- elife_poa_e34613_Supplementary_file_8.xlsx
- elife_poa_e34613_Supplementary_file_6.xlsx
- elife_poa_e34613_Figure_1_figure_supplement_3.pdf
- elife_poa_e34613_Figure_1_figure_supplement_6.pdf
- elife_poa_e34613_Supplementary_file_1.xlsx
- elife_poa_e34613_Figure_2_figure_supplement_2.pdf
- elife_poa_e34613_Figure_1_figure_supplement_5.pdf
- elife_poa_e34613_Figure_1_figure_supplement_7.pdf
- elife_poa_e34613_Figure_6_figure_supplement_1.pdf
- elife_poa_e34613_Supplementary_file_4.xlsx
- elife_poa_e34613_Supplementary_file_5.xlsx
- elife_poa_e34613_Figure_1_figure_supplement_1.pdf
- elife_poa_e34613_Figure_3_figure_supplement_1.pdf
- elife_poa_e34613_Supplementary_file_3.xlsx
- elife_poa_e34613_Supplementary_file_7.xlsx
- elife_poa_e34613_Supplementary_file_9.xlsx
- elife_poa_e34613_Figure_7_figure_supplement_1.pdf
