# Supplementary material for: Transcriptional profiling reveals extraordinary diversity among skeletal muscle tissues
Source: eLife journal article supplement (doi:10.7554/elife.34613), 2018-05-29
Supplement: supp [file elife-34613-supp-v1.zip › elife_poa_e34613_Figure_2_figure_supplement_1.pdf]

Figure 2-figure supplement 1:

| TON                                                                                         |                                                         |                                                                                             |                                                         |
|---------------------------------------------------------------------------------------------|---------------------------------------------------------|---------------------------------------------------------------------------------------------|---------------------------------------------------------|
| Enriched GO terms in upregulated genes                                                      |                                                         | Enriched GO terms in downregulated genes                                                    |                                                         |
| GO:0005198-structural molecule activity                                                     | 10<br>DIA, EDL, EYE, FDB, GAS, MAS, PLA, QUAD, SOL, TAN | GO:0030018-Z disc                                                                           | 10<br>DIA, EDL, EYE, FDB, GAS, MAS, PLA, QUAD, SOL, TAN |
| GO:0006544-epidemis development                                                             | 10<br>DIA, EDL, EYE, FDB, GAS, MAS, PLA, QUAD, SOL, TAN | GO:0016529-sarcoplasmic reticulum                                                           | 9<br>DIA, EDL, EYE, FDB, GAS, MAS, PLA, SOL, TAN        |
| GO:0005882-intermediate filament                                                            | 10<br>DIA, EDL, EYE, FDB, GAS, MAS, PLA, QUAD, SOL, TAN | GO:0006936-muscle contraction                                                               | 9<br>DIA, EDL, EYE, FDB, GAS, MAS, PLA, SOL, TAN        |
| GO:0045095-keratin filament                                                                 | 10<br>DIA, EDL, EYE, FDB, GAS, MAS, PLA, QUAD, SOL, TAN | GO:0042383-sarcolema                                                                        | 8<br>DIA, EDL, EYE, FDB, MAS, PLA, SOL, TAN             |
| GO:0030567-desmosome                                                                        | 10<br>DIA, EDL, EYE, FDB, GAS, MAS, PLA, QUAD, SOL, TAN | GO:0030016-myofibril                                                                        | 8<br>DIA, EDL, EYE, FDB, MAS, PLA, SOL, TAN             |
| GO:0030216-keratinocyte differentiation                                                     | 10<br>DIA, EDL, EYE, FDB, GAS, MAS, PLA, QUAD, SOL, TAN | GO:0007519-skeletal muscle tissue development                                               | 8<br>EDL, EYE, FDB, GAS, MAS, PLA, SOL, TAN             |
| GO:0031424-keratinization                                                                   | 10<br>DIA, EDL, EYE, FDB, GAS, MAS, PLA, QUAD, SOL, TAN | GO:0042767-protein ubiquitination involved in ubiquitin-dependent protein catabolic process | 7<br>EDL, FDB, GAS, PLA, QUAD, SOL, TAN                 |
| GO:0018149-peptide cross-linking                                                            | 10<br>DIA, EDL, EYE, FDB, GAS, MAS, PLA, QUAD, SOL, TAN | GO:0008307-structural constituent of muscle                                                 | 7<br>EDL, FDB, GAS, MAS, PLA, SOL, TAN                  |
| GO:0001533-cornified envelope                                                               | 10<br>DIA, EDL, EYE, FDB, GAS, MAS, PLA, QUAD, SOL, TAN |                                                                                             |                                                         |
| SOL                                                                                         |                                                         |                                                                                             |                                                         |
| Enriched GO terms in upregulated genes                                                      |                                                         | Enriched GO terms in downregulated genes                                                    |                                                         |
| GO:0030016-myofibril                                                                        | 9<br>DIA, EYE, FDB, GAS, MAS, PLA, QUAD, TAN, TON       | GO:0030018-Z disc                                                                           | 4<br>EDL, MAS, PLA, TAN                                 |
| GO:0030016-Z disc                                                                           | 9<br>DIA, EDL, EYE, GAS, MAS, PLA, QUAD, TAN, TON       | GO:0005975-carbohydrate metabolic process                                                   | 4<br>EDL, GAS, PLA, TAN                                 |
| GO:0003779-actin binding                                                                    | 8<br>DIA, EDL, EYE, GAS, MAS, PLA, TAN, TON             | GO:0005578-proteinaceous extracellular matrix                                               | 4<br>DIA, EYE, FDB, PLA                                 |
| GO:0031430-M band                                                                           | 8<br>EDL, EYE, GAS, MAS, PLA, QUAD, TAN, TON            |                                                                                             |                                                         |
| GO:0031672-A band                                                                           | 7<br>DIA, EDL, EYE, MAS, PLA, QUAD, TAN                 |                                                                                             |                                                         |
| GO:0016459-myosin complex                                                                   | 7<br>DIA, FDB, GAS, MAS, PLA, QUAD, TAN                 |                                                                                             |                                                         |
| GO:0001725-stress fiber                                                                     | 7<br>EDL, GAS, MAS, PLA, QUAD, TAN, TON                 |                                                                                             |                                                         |
| DIA                                                                                         |                                                         |                                                                                             |                                                         |
| Enriched GO terms in upregulated genes                                                      |                                                         | Enriched GO terms in downregulated genes                                                    |                                                         |
| GO:0006631-fatty acid metabolic process                                                     | 6<br>EDL, FDB, MAS, PLA, TAN, TON                       | GO:0030018-Z disc                                                                           | 7<br>EDL, FDB, GAS, MAS, PLA, SOL, TAN                  |
| GO:0050873-brown fat cell differentiation                                                   | 6<br>EDL, FDB, MAS, PLA, TAN, TON                       | GO:0030016-myofibril                                                                        | 5<br>EDL, EYE, FDB, PLA, SOL                            |
| GO:0052697-xenobiotic glucuronidation                                                       | 6<br>EDL, FDB, MAS, PLA, TAN, TON                       | GO:0016459-myosin complex                                                                   | 3<br>EDL, EYE, SOL                                      |
| GO:0001725-stress fiber                                                                     | 6<br>EDL, MAS, PLA, QUAD, TAN, TON                      | GO:0005578-proteinaceous extracellular matrix                                               | 2<br>EYE, FDB                                           |
| GO:0072662-blood microparticle                                                              | 5<br>EDL, EYE, PLA, SOL, TAN                            | GO:0016529-sarcoplasmic reticulum                                                           | 2<br>EDL, PLA                                           |
| GO:0042613-MHC class II protein complex                                                     | 5<br>EDL, FDB, PLA, SOL, TAN                            | GO:0008078-voltage-gated potassium channel complex                                          | 2<br>EDL, EYE                                           |
| GO:0005581-collagen trimer                                                                  | 5<br>EDL, MAS, PLA, SOL, TAN                            | GO:0032982-myosin filament                                                                  | 2<br>EDL, EYE                                           |
| GO:0030336-negative regulation of cell migration                                            | 5<br>EDL, MAS, PLA, SOL, TAN                            | GO:0042383-sarcolema                                                                        | 2<br>EDL, FDB                                           |
| GO:0045766-positive regulation of angiogenesis                                              | 5<br>EDL, MAS, PLA, SOL, TAN                            |                                                                                             |                                                         |
| GO:0006635-fatty acid beta-oxidation                                                        | 5<br>EDL, FDB, MAS, TAN, TON                            |                                                                                             |                                                         |
| PLA                                                                                         |                                                         |                                                                                             |                                                         |
| Enriched GO terms in upregulated genes                                                      |                                                         | Enriched GO terms in downregulated genes                                                    |                                                         |
| GO:0030018-Z disc                                                                           | 5<br>DIA, EYE, QUAD, SOL, TON                           | GO:0007156-homophilic cell adhesion via plasma membrane adhesion molecules                  | 4<br>DIA, EYE, FDB, TON                                 |
| GO:0030016-myofibril                                                                        | 5<br>DIA, EYE, MAS, QUAD, TON                           | GO:0001725-stress fiber                                                                     | 4<br>DIA, EYE, FDB, SOL                                 |
| GO:0006936-muscle contraction                                                               | 3<br>EYE, GAS, TON                                      | GO:0030175-filopodium                                                                       | 4<br>DIA, EYE, FDB, SOL                                 |
| GO:0005977-glycogen metabolic process                                                       | 3<br>FDB, SOL, TON                                      | GO:0071944-cell periphery                                                                   | 4<br>DIA, EYE, FDB, TON                                 |
| GO:0005578-proteinaceous extracellular matrix                                               | 3<br>EDL, SOL, TAN                                      | GO:0016459-myosin complex                                                                   | 4<br>DIA, EYE, FDB, SOL                                 |
|                                                                                             |                                                         | GO:0030864-cortical actin cytoskeleton                                                      | 3<br>DIA, EYE, FDB                                      |
|                                                                                             |                                                         | GO:0031527-filopodium membrane                                                              | 3<br>DIA, EYE, FDB                                      |
| MAS                                                                                         |                                                         |                                                                                             |                                                         |
| Enriched GO terms in upregulated genes                                                      |                                                         | Enriched GO terms in downregulated genes                                                    |                                                         |
| GO:0005578-extracellular region                                                             | 4<br>EDL, GAS, PLA, TAN                                 | GO:0009652-anterior/posterior pattern specification                                         | 7<br>DIA, EDL, GAS, PLA, QUAD, SOL, TAN                 |
| GO:0030018-Z disc                                                                           | 4<br>DIA, EYE, SOL, TON                                 | GO:0009954-proximal/distal pattern formation                                                | 7<br>EDL, FDB, GAS, PLA, QUAD, SOL, TAN                 |
| GO:0005615-extracellular space                                                              | 3<br>EDL, GAS, TAN                                      | GO:0030016-myofibril                                                                        | 7<br>DIA, EDL, EYE, FDB, GAS, PLA, SOL                  |
| GO:0030016-myofibril                                                                        | 2<br>SOL, TON                                           | GO:0060048-cardiac muscle contraction                                                       | 6<br>EDL, FDB, GAS, PLA, QUAD, SOL                      |
| GO:0004842-ubiquitin-protein transferase activity                                           | 2<br>EYE, TON                                           | GO:0001501-skeletal system development                                                      | 6<br>EDL, FDB, GAS, PLA, QUAD, TAN                      |
|                                                                                             |                                                         | GO:005010-ventricular cardiac muscle tissue morphogenesis                                   | 6<br>EDL, FDB, GAS, PLA, QUAD, SOL                      |
| FDB                                                                                         |                                                         |                                                                                             |                                                         |
| Enriched GO terms in upregulated genes                                                      |                                                         | Enriched GO terms in downregulated genes                                                    |                                                         |
| GO:0005604-basement membrane                                                                | 10<br>DIA, EDL, EYE, GAS, MAS, PLA, QUAD, SOL, TAN, TON | GO:0005743-mitochondrial inner membrane                                                     | 9<br>DIA, EDL, EYE, GAS, MAS, PLA, QUAD, SOL, TAN       |
| GO:0005578-proteinaceous extracellular matrix                                               | 9<br>DIA, EDL, EYE, GAS, MAS, PLA, QUAD, SOL, TAN       | GO:0005759-mitochondrial matrix                                                             | 9<br>DIA, EDL, EYE, GAS, PLA, QUAD, SOL, TAN            |
| GO:0031012-extracellular matrix                                                             | 9<br>DIA, EDL, EYE, GAS, MAS, PLA, QUAD, SOL, TAN       | GO:0006631-fatty acid metabolic process                                                     | 8<br>DIA, EDL, EYE, GAS, PLA, QUAD, SOL, TAN            |
| GO:0008201-heparin binding                                                                  | 9<br>DIA, EDL, EYE, GAS, MAS, PLA, QUAD, SOL, TAN       | GO:0031966-mitochondrial membrane                                                           | 8<br>DIA, EDL, EYE, GAS, PLA, QUAD, SOL, TAN            |
| GO:0005561-collagen trimer                                                                  | 8<br>DIA, EDL, GAS, MAS, PLA, QUAD, SOL, TAN            | GO:0005739-mitochondrion                                                                    | 7<br>DIA, EDL, GAS, PLA, QUAD, SOL, TAN                 |
| GO:0005518-collagen binding                                                                 | 8<br>DIA, EDL, GAS, MAS, PLA, QUAD, SOL, TAN            | GO:0055114-oxidation-reduction process                                                      | 7<br>DIA, EDL, EYE, GAS, PLA, SOL, TAN                  |
| GO:0001968-fibronectin binding                                                              | 8<br>DIA, EDL, EYE, GAS, MAS, PLA, SOL, TAN             | GO:0008152-metabolic process                                                                | 7<br>DIA, EDL, GAS, MAS, PLA, SOL, TAN                  |
| GO:0005178-integrin binding                                                                 | 8<br>DIA, EDL, GAS, MAS, PLA, QUAD, SOL, TAN            | GO:0003824-catalytic activity                                                               | 8<br>DIA, EDL, GAS, MAS, PLA, SOL, TAN                  |
| EYE                                                                                         |                                                         |                                                                                             |                                                         |
| Enriched GO terms in upregulated genes                                                      |                                                         | Enriched GO terms in downregulated genes                                                    |                                                         |
| GO:0016459-myosin complex                                                                   | 8<br>DIA, GAS, MAS, PLA, QUAD, SOL, TAN, TON            | GO:0009652-anterior/posterior pattern specification                                         | 7<br>DIA, EDL, GAS, PLA, QUAD, SOL, TAN                 |
| GO:0001725-stress fiber                                                                     | 7<br>EDL, GAS, MAS, PLA, QUAD, TAN, TON                 | GO:0030018-Z disc                                                                           | 7<br>EDL, FDB, GAS, MAS, PLA, SOL, TAN                  |
| GO:0030336-negative regulation of cell migration                                            | 7<br>EDL, GAS, MAS, PLA, QUA, SOL, TAN                  | GO:0036459-thiol-dependent ubiquitinyl hydrolase activity                                   | 3<br>GAS, MAS, PLA, QUAD, SOL, TAN                      |
| GO:0007156-homophilic cell adhesion via plasma membrane adhesion molecules                  | 7<br>EDL, GAS, MAS, PLA, QUAD, SOL, TAN                 | GO:0004642-ubiquitin-protein transferase activity                                           | 5<br>GASD, MAS, PLA, QUAD, TAN                          |
| GO:0030864-cortical actin cytoskeleton                                                      | 6<br>EDL, GAS, MAS, PLA, QUAD, TAN                      | GO:0030315-T-tubule                                                                         | 4<br>EDL, FDB, MAS, PLA                                 |
| GO:0030175-filopodium                                                                       | 6<br>EDL, GAS, MAS, PLA, QUAD, TAN                      | GO:0030016-myofibril                                                                        | 4<br>EDL, FDB, PLA, SOL                                 |
| GO:0031594-neuromuscular junction                                                           | 5<br>DIA, GAS, MAS, QUAD, SOL                           | GO:0007519-skeletal muscle tissue development                                               | 4<br>EDL, GAS, PLA, QUAD                                |
| GO:0005605-basal lamina                                                                     | 5<br>GAS, MAS, PLA, QUAD, TAN                           | GO:0008234-cysteine-type peptidase activity                                                 | 4<br>GAS, PLA, QUAD, SOL                                |
| EDL                                                                                         |                                                         |                                                                                             |                                                         |
| Enriched GO terms in upregulated genes                                                      |                                                         | Enriched GO terms in downregulated genes                                                    |                                                         |
| GO:0030016-myofibril                                                                        | 7<br>DIA, EYE, FDB, MAS, QUAD, TAN, TON                 | GO:0030593-neutrophil chemotaxis                                                            | 4<br>DIA, EYE, FDB, TON                                 |
| GO:0030018-Z disc                                                                           | 5<br>DIA, EYE, MAS, SOL, TON                            | GO:0072562-blood microparticle                                                              | 4<br>DIA, EYE, FDB, QUAD                                |
| GO:0016529-sarcoplasmic reticulum                                                           | 4<br>EYE, QUAD, SOL, TON                                | GO:0032587-ruffle membrane                                                                  | 3<br>DIA, EYE, TON                                      |
| GO:0008078-voltage-gated potassium channel complex                                          | 4<br>DIA, EYE, SOL, TON                                 | GO:0001725-stress fiber                                                                     | 3<br>DIA, EYE, SOL                                      |
| GO:0030315-T-tubule                                                                         | 4<br>DIA, EYE, SOL, TON                                 | GO:0045766-positive regulation of angiogenesis                                              | 3<br>DIA, EYE, FDB                                      |
| GO:0042383-sarcolema                                                                        | 4<br>DIA, EYE, SOL, TON                                 | GO:0005581-collagen trimer                                                                  | 3<br>DIA, EYE, FDB                                      |
| GO:0030017-sarcomere                                                                        | 4<br>EYE, FDB, MAS, TON                                 | GO:0005178-integrin binding                                                                 | 3<br>DIA, EYE, FDB                                      |
| GO:0030017-sarcoplasmic reticulum membrane                                                  | 4<br>EYE, QUAD, SOL, TON                                | GO:0009617-response to bacterium                                                            | 3<br>DIA, EYE, TON                                      |
|                                                                                             |                                                         | GO:0008201-heparin binding                                                                  | 3<br>DIA, FDB, PLA                                      |
|                                                                                             |                                                         | GO:0005604-basement membrane                                                                | 3<br>DIA, FDB, SOL                                      |
|                                                                                             |                                                         | GO:0002786-positive regulation of tumor necrosis factor production                          | 3<br>DIA, FDB, TON                                      |
| TAN                                                                                         |                                                         |                                                                                             |                                                         |
| Enriched GO terms in upregulated genes                                                      |                                                         | Enriched GO terms in downregulated genes                                                    |                                                         |
| GO:0030018-Z disc                                                                           | 4<br>DIA, EYE, SOL, TON                                 | GO:0005578-proteinaceous extracellular matrix                                               | 6<br>DIA, EYE, FDB, PLA, QUAD, SOL                      |
| GO:0005977-glycogen metabolic process                                                       | 3<br>EYE, FDB, SOL                                      | GO:0005604-basement membrane                                                                | 4<br>DIA, EYE, FDB, SOL                                 |
| GO:0009652-anterior/posterior pattern specification                                         | 3<br>EYE, MAS                                           | GO:0001725-stress fiber                                                                     | 4<br>EDL, EYE, FDB, SOL                                 |
| GO:0004842-ubiquitin-protein transferase activity                                           | 2<br>EYE, TON                                           | GO:0030016-myofibril                                                                        | 4<br>EDL, EYE, FDB, SOL                                 |
| GAS                                                                                         |                                                         |                                                                                             |                                                         |
| Enriched GO terms in upregulated genes                                                      |                                                         | Enriched GO terms in downregulated genes                                                    |                                                         |
| GO:0030019-Z disc                                                                           | 3<br>DIA, EYE, TON                                      | GO:0030864-cortical actin cytoskeleton                                                      | 4<br>EYE, FDB, SOL, TON                                 |
| GO:0009954-proximal/distal pattern formation                                                | 3<br>DIA, EYE, MAS                                      | GO:0001725-stress fiber                                                                     | 3<br>EYE, FDB, SOL                                      |
| GO:0005977-glycogen metabolic process                                                       | 3<br>FDB, SOL, TON                                      | GO:0007156-homophilic cell adhesion via plasma membrane adhesion molecules                  | 3<br>EYE, FDB, TON                                      |
| GO:0009652-anterior/posterior pattern specification                                         | 2<br>EYE, MAS                                           | GO:0016459-myosin complex                                                                   | 3<br>EYE, FDB, SOL                                      |
| GO:0004842-ubiquitin-protein transferase activity                                           | 2<br>EYE, TON                                           | GO:0030863-cortical cytoskeleton                                                            | 3<br>EYE, FDB, SOL                                      |
| GO:0006511-ubiquitin-dependent protein catabolic process                                    | 2<br>EYE, TON                                           |                                                                                             |                                                         |
| GO:0007519-skeletal muscle tissue development                                               | 2<br>EYE, TON                                           |                                                                                             |                                                         |
| QUAD                                                                                        |                                                         |                                                                                             |                                                         |
| Enriched GO terms in upregulated genes                                                      |                                                         | Enriched GO terms in downregulated genes                                                    |                                                         |
| GO:0009652-anterior/posterior pattern specification                                         | 2<br>EYE, MAS                                           | GO:0016459-myosin complex                                                                   | 6<br>DIA, EDL, EYE, FDB, PLA, SOL                       |
| GO:0004842-ubiquitin-protein transferase activity                                           | 2<br>EYE, TON                                           | GO:0001725-stress fiber                                                                     | 6<br>DIA, EDL, EYE, FDB, PLA, SOL                       |
| GO:0006511-ubiquitin-dependent protein catabolic process                                    | 2<br>EYE, TON                                           | GO:0031594-neuromuscular junction                                                           | 5<br>EDL, EYE, FDB, PLA, SOL                            |
| GO:0042787-protein ubiquitination involved in ubiquitin-dependent protein catabolic process | 2<br>EYE, TON                                           | GO:0005089-Rho guanyl-nucleotide exchange factor activity                                   | 5<br>DIA, EYE, MAS, SOL, TON                            |
| GO:0061630-ubiquitin protein ligase activity                                                | 2<br>EYE, TON                                           | GO:0051015-actin filament binding                                                           | 4<br>DIA, EYE, FDB, SOL                                 |
| GO:0000151-ubiquitin ligase complex                                                         | 2<br>EDL, TON                                           | GO:0030898-actin-dependent ATPase activity                                                  | 4<br>DIA, EYE, FDB, SOL                                 |
| GO:0008234-cysteine-type peptidase activity                                                 | 2<br>EYE, TON                                           | GO:0035023-regulation of Rho protein signal transduction                                    | 4<br>DIA, EYE, MAS, TON                                 |
|                                                                                             |                                                         | GO:0030864-cortical actin cytoskeleton                                                      | 4<br>DIA, EYE, FDB, TON                                 |
