# Supplementary material for: Transcriptional profiling reveals extraordinary diversity among skeletal muscle tissues
Source: eLife journal article supplement (doi:10.7554/elife.34613), 2018-05-29
Supplement: supp [file elife-34613-supp-v1.zip › elife_poa_e34613_Supplementary_file_1.xlsx]

## Sheet: Sheet1
Tissue	Replicate	Reads	Uniquely aligned reads	NU reads	Total Aligned	% Uniquely aligned reads	% NU reads	% Total Aligned
AOR_Total	1	35765748	26731364	8603905	35335269	0.747401	0.240563	0.987964
	2	31038637	24883980	5704678	30588658	0.80171	0.183793	0.985503
	3	30353264	24233571	5596921	29830492	0.798384	0.184393	0.982777
	4	38886763	32063652	6182299	38245951	0.824539	0.158982	0.983521
	5	42485079	32388161	9532093	41870254	0.762342	0.224363	0.985528
	6	29914315	24681124	4615500	29296624	0.825061	0.154291	0.979351
AOR_Abdominal	1	30266476	25485624	4474814	29960438	0.842041	0.147847	0.989889
	2	40931092	35464053	4930950	40395003	0.866433	0.12047	0.986903
	3	33766479	28949133	4281326	33230459	0.857333	0.126792	0.984126
	4	38666034	33380429	4861536	38241965	0.863301	0.125731	0.989033
	5	37804938	32141028	5184776	37325804	0.850181	0.137145	0.987326
	6	41050049	35407806	5141013	40548819	0.862552	0.125238	0.98779
AOR_Thoracic	1	43662119	36964662	6199829	43164491	0.846607	0.141996	0.988603
	2	34997461	29773877	4815437	34589314	0.850744	0.137594	0.988338
	3	35036310	29786186	4550291	34336477	0.850152	0.129874	0.980025
	4	42858909	35838634	6519265	42357899	0.8362	0.15211	0.98831
	5	28862699	24465485	4096783	28562268	0.847651	0.14194	0.989591
	6	31330884	26377387	4594574	30971961	0.841897	0.146647	0.988544
ATR	1	29777446	24230611	5055362	29285973	0.813724	0.169772	0.983495
	2	34156167	27639215	6125353	33764568	0.809201	0.179334	0.988535
	3	24278447	19236842	4767696	24004538	0.792342	0.196376	0.988718
	4	31460555	25131538	5963360	31094898	0.798827	0.18955	0.988377
	5	26360416	20967505	5074935	26042440	0.795416	0.192521	0.987937
	6	25083000	19990362	4778708	24769070	0.796969	0.190516	0.987484
LV	1	35921978	24299022	11305260	35604282	0.676439	0.314717	0.991156
	2	33835874	22288359	11280095	33568454	0.65872	0.333377	0.992097
	3	32331818	24462711	10609175	32071886	0.756614	0.328134	0.99196
	4	35325775	25155344	9871094	35026438	0.712096	0.27943	0.991526
	5	22541615	16140501	6143658	22284159	0.716031	0.272547	0.988579
	6	35702202	24951477	10418772	35370249	0.698878	0.291824	0.990702
RV	1	24329044	16839803	7285748	24125551	0.692169	0.299467	0.991636
	2	31780005	21790508	9734000	31524508	0.685667	0.306293	0.99196
	3	36994396	25156729	11537917	36694646	0.680015	0.311883	0.991897
	4	29036772	20557089	8240098	28797187	0.707967	0.283781	0.991749
	5	27626476	19211196	8187105	27398301	0.695391	0.29635	0.991741
	6	27913480	19437173	8230564	27667737	0.696336	0.29486	0.991196
DIA	1	33019480	23836474	8732772	32569246	0.721891	0.264473	0.986365
	2	31629751	23388399	7885484	31273883	0.739443	0.249306	0.988749
	3	31945551	23927206	7636605	31563811	0.749	0.239051	0.98805
	4	21311980	15246726	5789401	21036127	0.715406	0.27165	0.987056
	5	19037470	13946740	4898128	18844868	0.732594	0.257289	0.989883
	6	24059171	17556632	6259110	23815742	0.729727	0.260155	0.989882
EDL	1	31576015	24902704	6228134	31130838	0.788659	0.197243	0.985901
	2	31451634	24783197	6244774	31027971	0.787978	0.198552	0.98653
	3	33216118	25518587	7299078	32817665	0.768259	0.219745	0.988004
	4	21401430	16499880	4625790	21125670	0.770971	0.216144	0.987115
	5	31197719	24046037	6789188	30835225	0.770763	0.217618	0.988381
	6	30283998	22589060	7306367	29895427	0.745907	0.241262	0.987169
EYE	1	31762860	23064615	8354068	31418683	0.72615	0.263014	0.989164
	2	31945869	22979679	8623587	31603266	0.719332	0.269944	0.989276
	3	28119001	20432792	7362473	27795265	0.726654	0.261833	0.988487
	4	27629144	19883997	7435738	27319736	0.719675	0.269127	0.988801
	5	29768612	20721448	8732342	29453790	0.696084	0.293341	0.989424
	6	24372471	16484361	7648242	24132603	0.676352	0.313807	0.990158
FDB	1	34935337	28433677	6119522	34553199	0.813894	0.175167	0.989062
	2	30805461	25201955	5279068	30481023	0.8181	0.171368	0.989468
	3	31796088	26115282	5339080	31454362	0.821336	0.167916	0.989253
	4	35574878	29408999	5747764	35156763	0.826679	0.161568	0.988247
	5	34474174	28449265	5646436	34095701	0.825234	0.163787	0.989022
	6	37140146	30331631	6409407	36741038	0.81668	0.172574	0.989254
MAS	1	47698800	34455257	12875450	47330707	0.722351	0.269932	0.992283
	2	39717983	28537223	10778018	39315241	0.718496	0.271364	0.98986
	3	36344724	26913940	8999850	35913790	0.740518	0.247625	0.988143
	4	31720345	24373850	6949606	31323456	0.768398	0.21909	0.987488
	5	24410038	18689701	5472331	24162032	0.765656	0.224184	0.98984
	6	38477271	28325335	9795468	38120803	0.736158	0.254578	0.990736
PLA	1	17325408	12810123	4335484	17145607	0.739384	0.250238	0.989622
	2	34137807	26160356	7603385	33763741	0.766316	0.222726	0.989042
	3	31601098	23656195	7648805	31305000	0.748588	0.242042	0.99063
	4	34857760	25974447	8531031	34505478	0.745155	0.244738	0.989894
	5	33451589	24867139	8263107	33130246	0.743377	0.247017	0.990394
	6	35532067	25491116	9752493	35243609	0.717412	0.27447	0.991882
SOL	1	31211755	23594793	7267721	30862514	0.755959	0.232852	0.988811
	2	29040389	21985458	6780345	28765803	0.757065	0.23348	0.990545
	3	44546485	32296159	11882663	44178882	0.724999	0.266747	0.991748
	4	16966114	12313609	4455934	16769543	0.725777	0.262637	0.988414
	5	27390307	20596063	6560878	27156941	0.751947	0.239533	0.99148
	6	24667682	18746989	5685297	24432286	0.759982	0.230476	0.990457
TON	1	35362248	27098477	7860465	34958942	0.766311	0.222284	0.988595
	2	25788691	20501956	4939573	25441529	0.794998	0.19154	0.986538
	3	22681867	17660674	4759243	22419917	0.778625	0.209826	0.988451
	4	35246582	26663556	8179347	34842903	0.756486	0.232061	0.988547
	5	47072213	36377715	10147398	46525113	0.772807	0.215571	0.988377
	6	46723356	33908057	12306310	46214367	0.72572	0.263387	0.989106
	1	43307706	31808676	10886046	42694722	0.734481	0.251365	0.985846
	2	47299527	35755931	10985816	46741747	0.755947	0.232261	0.988207
	3	42511529	29532830	12009838	41542688	0.694702	0.282508	0.97721
	4	51314235	35201237	15402036	50603273	0.685994	0.300151	0.986145
	5	44385898	30349707	13565390	43915097	0.683769	0.305624	0.989393
GAS	6	51072010	35829864	14757854	50587718	0.701556	0.288962	0.990517
	1	44938344	31407593	13055370	44462963	0.698904	0.290517	0.989421
	2	52931439	37490718	14945743	52436461	0.708288	0.28236	0.990649
	3	46228667	32133031	13666625	45799656	0.695089	0.295631	0.99072
	4	46585936	31177483	15001039	46178522	0.669247	0.322008	0.991255
	5	42713171	28924327	13397648	42321975	0.677176	0.313665	0.990841
QUAD	6	44978803	31435740	12981242	44416982	0.698901	0.288608	0.987509
	1	49434172	36880210	11788899	48669109	0.746047	0.238477	0.984524
	2	42644431	31629918	10259282	41889200	0.741713	0.240577	0.98229
	3	43880529	33727439	9482543	43209982	0.76862	0.216099	0.984719
	4	46479997	35288566	10396487	45685053	0.75922	0.223677	0.982897
	5	51663346	33884301	17232178	51116479	0.655867	0.333547	0.989415
TAN	6	46475026	29919594	16106053	46025647	0.643778	0.346553	0.990331
	1	35917834	32305280	2967629	35272909	0.899422	0.0826227	0.982044
	2	25834807	22865878	2470654	25336532	0.88508	0.0956328	0.980713
	3	37387833	33958290	2859997	36818287	0.908271	0.0764954	0.984767
	4	37807711	34129098	3062278	37191376	0.902702	0.0809961	0.983698
	5	47677545	43118940	3806030	46924970	0.904387	0.0798286	0.984215
Rat_EDL_Male	6	45519983	41389888	3423204	44813092	0.909269	0.0752022	0.984471
	1	38802668	35252252	2923319	38175571	0.908501	0.0753381	0.983839
	2	32971683	29993013	2476602	32469615	0.90966	0.075113	0.984773
	3	30542834	27632762	2456582	30089344	0.904722	0.0804307	0.985152
	4	32764438	29637389	2624571	32261960	0.90456	0.0801043	0.984664
	5	34906504	32037603	2411567	34449170	0.917812	0.0690865	0.986898
Rat_EDL_Female	6	39902690	36336398	3015174	39351572	0.910625	0.0755632	0.986188
	1	49036067	43522793	4598859	48121652	0.887567	0.0937852	0.981352
	2	33886651	29183959	2927237	32111196	0.861223	0.0863832	0.947606
	3	43321337	39114618	3477018	42591636	0.902895	0.0802611	0.983156
	4	50690677	46131412	3765876	49897288	0.910057	0.0742913	0.984348
	5	44198978	40178753	3322346	43501099	0.909043	0.0751679	0.984211
Rat_SOL_Male	6	45713162	41315077	3639574	44954651	0.90379	0.0796176	0.983407
	1	40377339	36221612	3502692	39724304	0.897078	0.086749	0.983827
	2	38801558	34942748	3218873	38161621	0.90055	0.0829573	0.983507
	3	41758025	37643174	3450133	41093307	0.90146	0.082622	0.984082
	4	47229846	42704883	3804804	46509687	0.904193	0.0805593	0.984752
	5	40138570	35732912	3765790	39498702	0.890239	0.0938197	0.984059
Rat_SOL_Female	6	38627993	34582180	3407001	37989181	0.895262	0.0882003	0.983462
