# Supplementary material for: Transcriptional profiling reveals extraordinary diversity among skeletal muscle tissues
Source: eLife journal article supplement (doi:10.7554/elife.34613), 2018-05-29
Supplement: supp [file elife-34613-supp-v1.zip › elife_poa_e34613_Supplementary_file_2.xlsx]

## Sheet: Sheet1
	gene	transcript	q	diaphragm	eye	EDL	FDB	gastrocnemius	masseter	plantaris	quadriceps	soleus	tibialis anterior	tongue
1	Rp1	uc007aew	6.1e-10	0.37	0.05	0.05	0.42	0.1	0.05	0.07	0.01	2.12	0.04	0.15
2	Rp1	uc007aex	1.4e-12	0.24	0.08	0.04	0.67	0.07	0.05	0.06	0.02	1.91	0.02	0.25
3	Sox17	uc007aey	5.3e-13	2.59	2.9	1.67	0.84	1.17	1.31	1.11	1.42	2.49	1.33	0.98
4	Sox17	uc007afc	2.4e-16	2.44	2.7	1.61	0.84	1.09	1.26	1.16	1.2	2.37	1.26	1.64
5	Sox17	uc007afa	1.2e-15	2.73	3.19	1.75	1.11	1.47	1.52	1.51	1.55	2.88	1.72	1.56
6	Sox17	uc007afb	5.7e-16	2.63	2.94	1.71	0.92	1.23	1.4	1.27	1.36	2.62	1.42	1.67
7	Sox17	uc007aez	6.7e-16	2.56	2.97	1.66	1.02	1.35	1.39	1.4	1.42	2.66	1.57	1.56
8	Mrpl15	uc007aff	1.4e-16	23.91	25.18	17.89	13.11	22.86	18.2	21.01	24.75	22.29	23.44	10.98
9	Mrpl15	uc007afd	8.4e-16	23.12	23.08	17.57	13.01	22.48	18.78	20.94	23.77	22.61	23.62	20.25
10	Lypla1	uc007afg	1.9e-09	15.42	14.21	17.03	16.27	20.69	19.13	19.34	19.88	19.5	18.78	16.13
11	Mrpl15	uc007afe	7.5e-14	21.73	21.56	16.19	12.01	21.91	17.87	19.71	23.87	21.37	22.06	11.35
12	Atp6v1h	uc007afm	1e-17	3.58	4.19	1.89	4.95	2.87	2.65	2.85	2.67	5.19	2.35	4.18
13	Atp6v1h	uc007afn	1e-16	16.12	21.42	9.03	23.2	14.62	12.33	12.94	16.1	23.68	11.25	12.76
14	Rb1cc1	uc007afr	4.3e-09	15.69	12.41	14.69	17.12	24.58	23.13	19.16	31.67	17.61	18.87	6.58
15	Rb1cc1	uc011whx	9e-09	17.1	13.68	15.94	18.5	26.64	25.11	20.87	34.53	19.01	20.29	13.78
16	Rb1cc1	uc007afs	5e-12	9.21	6.33	8.23	10.51	15.69	14.64	11.82	19.87	11.1	11.42	10.66
17	Pcmtd1	uc007agb	6.2e-09	25.45	20.83	24.01	25.16	35.28	31.41	28.97	46.5	23.69	35.56	10.13
18	Pcmtd1	uc007agc	3.9e-08	25.45	21.25	23.74	25.97	34.91	30.88	28.52	46.52	23.51	34.89	20.25
19	Npbwr1	uc011whw	2.8e-20	0	0	0	0	0	0	0	0	0	0	9.77
20	Pcmtd1	uc007agd	1.3e-07	23	19.38	21.32	23.47	30.86	27.66	25.32	41.36	21.07	30.84	9.19
21	Rrs1	uc007agk	3.2e-10	7.69	6.61	6.53	5.1	5.4	5.45	6.05	6.38	7.14	4.65	13.1
22	Adhfe1	uc007agl	7.9e-32	31.94	29.39	27.7	6.5	17.31	13.71	20.18	20.64	23.19	18.13	9.33
23	2610203C22Rik	uc007agn	5e-07	1.39	0.64	0.68	1.41	1.01	1.4	1.17	1.05	0.87	0.71	0.7
24	Adhfe1	uc007agm	7.8e-32	32.33	29.76	28.06	6.58	17.54	13.89	20.43	20.91	23.49	18.37	6.19
25	2610203C22Rik	uc007ago	1.6e-09	1.98	0.72	1.01	2.48	1.74	2.09	1.88	1.45	1.12	1.33	6.53
26	Sgk3	uc007agu	2.6e-07	3.69	3.17	2.28	4.42	3.65	3.95	3.81	4.23	4.75	3.22	2.44
27	Sgk3	uc007agv	2.6e-07	3.75	3.23	2.31	4.5	3.73	4.02	3.88	4.31	4.84	3.28	4.89
28	Sgk3	uc007agw	2.5e-07	3.55	3.06	2.19	4.25	3.52	3.8	3.66	4.07	4.58	3.1	4.8
29	Sgk3	uc011wid	2.5e-07	3.66	3.14	2.25	4.37	3.62	3.91	3.77	4.19	4.7	3.18	4.73
30	Sgk3	uc007agx	2.6e-07	3.76	3.24	2.32	4.51	3.73	4.03	3.88	4.32	4.85	3.29	4.87
31	Sgk3	uc007agy	2.6e-07	3.73	3.21	2.3	4.47	3.7	4	3.85	4.28	4.81	3.26	4.92
32	Snhg6	uc007aha	1.7e-13	19.21	23.6	22.56	34.52	50.22	23.22	31.9	56.57	22.61	35.94	16.34
33	Cops5	uc007ahe	1.1e-18	69.27	78.07	86.71	98.27	131.19	80.4	96.87	146.94	84.75	116.09	69.91
34	Mcmdc2	uc011wie	6.6e-07	0.04	0.04	0	0.07	0	0.02	0.01	0	0.07	0.01	33.81
35	Cspp1	uc007ahi	2.6e-11	2.08	2.35	1.33	2.17	1.86	2.2	1.74	2.06	1.66	1.42	2.17
36	Cops5	uc007ahf	5.4e-26	27.65	27.63	35.5	37.92	42.59	31.09	36.67	44.09	33.96	40.84	12.93
37	Arfgef1	uc007ahn	1.1e-15	31.48	20.93	27.77	24.83	49.5	40.15	41.2	60.81	38.58	38.16	10.7
38	Arfgef1	uc007aho	5.4e-15	6.75	4.55	6.27	5.56	12.36	9.08	9.64	15.36	9.06	8.4	12.8
39	Arfgef1	uc007ahp	1.1e-16	23.45	11.91	22.22	20.33	43.15	35.59	34.42	50.71	33.22	32.22	8.42
40	Cpa6	uc007ahr	9.1e-11	0	0	0	0.03	0	0.33	0	0.01	0	0.02	6.32
41	Cspp1	uc011wih	1.9e-11	2.16	2.46	1.37	2.23	1.92	2.27	1.77	2.1	1.72	1.47	2.03
42	Prex2	uc007ahs	4.3e-07	2.88	3.18	1.55	1.62	2.37	2.33	1.7	2.57	2.29	2.55	2.98
43	Prex2	uc007aht	7.2e-07	0.68	0.64	0.3	0.46	0.91	0.74	0.41	0.84	0.56	0.93	1.15
44	Sulf1	uc007aia	5.7e-28	16.83	9.1	3.04	9.99	4.23	14.18	4.48	3.5	4.29	2.77	2.43
45	Sulf1	uc007aib	6.6e-28	17.06	9.24	3.08	10.13	4.3	14.39	4.56	3.56	4.33	2.82	4.9
46	Sulf1	uc007aic	3.6e-26	7.7	3.1	1.38	4.55	1.67	7.73	2.12	1.23	2.06	1.11	3.3
47	Sulf1	uc007aid	5.6e-28	16.74	9.13	3.05	10.01	4.23	14.25	4.49	3.49	4.29	2.77	3.28
48	Slco5a1	uc007aif	6.6e-19	15.45	13.14	6.87	8.72	12.31	15.76	10.56	12.73	29.88	12.09	5.39
49	Slco5a1	uc007aig	3.6e-14	2.96	1.8	1.57	1.63	2.36	4.18	2.14	2.06	6.49	2.45	6.57
50	Slco5a1	uc007aih	3.2e-14	2.77	1.66	1.45	1.44	1.83	3.61	1.82	1.55	5.9	2.04	2.32
51	Slco5a1	uc007aii	1.1e-14	3.07	1.83	1.59	1.65	2.38	4.22	2.15	2.12	6.7	2.48	2.32
52	Tram1	uc007ait	2.3e-15	17.74	20.81	8.93	18.18	10.32	17.53	10.68	11.85	12.38	8.16	37.92
53	Sulf1	uc007aie	1.3e-25	24.19	14.98	4.41	14.67	6.63	18.95	6.46	5.79	6.23	4.21	23.08
54	Eya1	uc007aiw	1.2e-15	9.52	22.47	15.18	9.52	15.65	18.59	15.1	18.78	11.32	13.26	4.89
55	Eya1	uc007aiz	1.1e-15	8.55	20.31	13.59	8.6	14.08	16.63	13.52	16.96	10	11.94	9.06
56	Eya1	uc007aix	8.7e-16	8.45	19.99	13.47	8.51	13.9	16.52	13.42	16.72	9.94	11.78	8.53
57	Eya1	uc007aiy	8.4e-16	8.45	19.99	13.48	8.51	13.91	16.53	13.43	16.73	9.95	11.79	8.47
58	Msc	uc007aja	3.2e-08	1.25	1.35	0.59	0.74	0.5	0.69	0.57	0.37	0.67	0.54	0.57
59	Terf1	uc007aji	1.3e-08	2.82	3.28	1.7	2.47	3.34	3.22	2.31	4.18	2.02	2.33	2.77
60	Sbspon	uc007ajj	3.3e-12	0.2	1.98	0.38	0.49	0.31	0.39	0.29	0.22	0.35	0.22	0.23
61	Terf1	uc007ajh	2.1e-08	2.8	3.23	1.71	2.42	3.25	3.19	2.26	4.14	1.99	2.29	2.24
62	Rpl7	uc007ajl	3.4e-11	67.25	87.77	54.17	100.12	66.35	78.03	75.69	55.65	80.93	59.19	61.71
63	Stau2	uc007ajo	9e-29	32.84	12.97	19.73	79.63	38.81	23.32	44.18	49.88	62.27	31.36	70.92
64	Stau2	uc007ajn	8.5e-29	31.91	12.51	19.04	76.52	37.42	22.6	42.65	48.1	60.12	30.27	22.56
65	Stau2	uc007ajq	1.4e-26	19.36	10.24	13.68	52.47	27.6	15.79	29.63	33.93	38.96	22.56	18.66
66	Stau2	uc007ajr	9.8e-29	6.96	2.67	4.21	16.12	7.81	5.25	9.93	9.08	13.15	6.98	10.22
67	Rdh10	uc007ajm	3.5e-13	2.42	3.71	1.64	4.76	2.05	2.06	2.12	2.35	1.95	1.87	33.64
68	Tmem70	uc007ajx	1e-11	76.59	74.95	46.52	31.66	70.31	57.53	55.81	79.95	64.51	66.67	31.87
69	Tmem70	uc007ajy	1e-11	76.72	75.08	46.6	31.72	70.43	57.63	55.91	80.09	64.62	66.79	63.79
70	Ly96	uc011wim	7.8e-10	4.92	4.18	1.52	3.26	3.07	2.62	1.53	3.23	2.85	1.87	35.31
71	Ly96	uc007ajz	1e-09	4.51	3.82	1.39	3	2.85	2.39	1.45	2.94	2.59	1.71	34.42
72	Gdap1	uc007akb	1.5e-33	0.17	1.24	5.22	1.06	3.74	2.77	4.7	3.88	0.23	2.97	3.21
73	Gdap1	uc007akc	7.7e-37	0.87	7.24	25.24	6.18	25.79	14.88	25.27	34.68	1.15	15.34	0.74
74	Jph1	uc007aka	2.2e-31	45.73	46.49	122.98	90.19	123.51	116.5	111.48	145.98	56.93	111.94	18
75	Pi15	uc007ake	9.2e-08	0.37	1.04	0.24	0.38	0.74	0.23	0.45	0.6	0.29	0.18	0.57
76	Crispld1	uc007akg	4.4e-12	0.75	1.92	0.57	2.19	1.14	0.86	1.11	1.12	1.72	0.66	1.35
77	Crispld1	uc007akh	3.3e-12	0.71	1.81	0.54	2.06	1.07	0.81	1.04	1.04	1.62	0.62	0.73
78	Mir133b	uc011win	6.5e-22	3.53	5.9	0.1	14.21	0.65	0.11	0.53	0.16	16.51	0.05	1.15
79	Mcm3	uc007alc	1.2e-10	2.3	1.9	1.44	1.88	1.06	2.73	1.3	0.79	1.85	0.98	1.4
80	Paqr8	uc007ald	2.5e-17	0.56	0.87	0.25	1.62	0.38	0.36	0.33	0.31	0.73	0.23	0.23
81	Paqr8	uc007ale	2.5e-17	0.56	0.88	0.25	1.63	0.39	0.36	0.33	0.31	0.74	0.23	0.45
82	Tmem14a	uc007ali	1.8e-07	1.49	1.89	1.09	0.85	1.46	0.95	1.05	1.55	0.92	1.13	1.86
83	Tmem14a	uc007alj	3.2e-07	1.7	2.2	1.25	0.98	1.68	1.09	1.21	1.79	1.06	1.3	1.91
84	Gsta3	uc007alk	8.5e-24	8.88	2.51	0.26	4.17	0.8	0.58	0.33	1.04	0.41	0.56	3.97
85	Tram2	uc007alg	1.3e-15	1.83	1.2	1.39	3.32	1.15	0.81	1.65	0.84	1.75	0.94	3.72
86	Gsta3	uc007all	9e-24	9.48	2.69	0.28	4.44	0.86	0.62	0.36	1.11	0.44	0.59	4
87	Kcnq5	uc011wio	3.1e-26	5.65	5.64	6.87	9.02	4.77	20.51	10.54	5.39	5.62	5.68	2.93
88	Kcnq5	uc007alq	3.1e-26	5.69	5.68	6.91	9.08	4.81	20.65	10.62	5.42	5.66	5.72	5.81
89	Kcnq5	uc009uzv	7.9e-16	4.65	3.77	7.16	8.21	2.94	18.88	8.76	2.27	4.85	3.64	5.44
90	4933415F23Rik	uc007alz	3.3e-23	0	0	0.11	1.32	1.13	0	0.99	0.14	8.74	0.36	0.05
91	Ogfrl1	uc007amb	1.1e-11	1.82	2.27	2.02	3.86	3.65	4.79	2.69	3.99	2.95	2.76	1.33
92	Smap1	uc007amg	4.2e-09	14.19	13.92	10.92	15.13	15.09	14.08	11.99	18.71	15.09	12.61	18.07
93	Smap1	uc007amh	4e-09	13.08	12.83	10.08	13.94	13.9	12.99	11.06	17.24	13.91	11.62	18.42
94	1110058L19Rik	uc007amj	5.4e-22	69.74	65.27	32.26	36.87	40.3	34.65	39.57	40.92	81.32	45.92	31.95
95	Fam135a	uc011wiq	3.9e-09	6.47	7.38	6.96	19.13	9.18	9.11	7.68	10.17	10.38	8.92	33.79
96	Fam135a	uc007amk	3.8e-09	6.49	7.4	6.98	19.2	9.21	9.14	7.71	10.2	10.42	8.95	10.71
97	Fam135a	uc007aml	5.1e-10	5.78	6.21	6.28	17.26	8.18	8.27	7.01	9	9.48	7.97	9.78
98	Col9a1	uc007amo	1.1e-24	0	0.05	1.3	7.68	0.96	0.01	2.18	0.37	0.03	0.93	0.02
99	Fam135a	uc007amn	6.1e-13	1.34	0.95	1.55	4.54	1.9	2.19	1.9	1.98	2.47	1.91	0.6
100	Col9a1	uc007amp	4.8e-24	0	0.06	1.57	9.31	1.12	0	2.62	0.45	0.03	1.1	0.04
101	Phf3	uc007ane	2.1e-12	9.11	7.14	6.06	9.74	8.73	11.42	8.36	9.64	9.23	7.1	4.39
102	Phf3	uc007anf	1.5e-08	3.98	2.94	2.76	4.62	4.36	5.82	4	5.13	4.74	3.28	6.01
103	Phf3	uc007ang	3.7e-08	2.55	1.84	1.7	2.94	2.79	3.65	2.45	3.3	2.99	2.06	2.67
104	Ptp4a1	uc007anh	6.3e-09	3.9	4.27	2.07	2.46	3.69	2.67	2.81	5.97	4.57	2.44	3.23
105	Ptp4a1	uc007ani	6.4e-09	3.91	4.27	2.07	2.46	3.69	2.67	2.81	5.97	4.57	2.44	4.4
106	Prim2	uc007anq	6.1e-09	1.36	1.2	0.67	1.14	0.71	1.07	0.64	0.61	0.94	0.57	0.93
107	Rab23	uc007anu	2.9e-13	0.47	0.56	0.34	1.07	0.42	0.38	0.41	0.39	0.68	0.33	0.33
108	Rab23	uc007anv	7.2e-16	1.48	1.57	0.92	3.14	1.2	1.15	1.32	1.08	1.96	0.98	1.07
109	Rab23	uc007anw	5.4e-23	2.85	3.38	1.85	4.75	1.87	1.91	1.9	1.91	2.83	1.69	2.75
110	Rab23	uc007anx	4.3e-23	2.79	3.31	1.81	4.65	1.83	1.87	1.85	1.87	2.77	1.65	3.87
111	Bag2	uc007any	1.9e-27	30.93	22.6	13.95	16.11	13.91	23.07	14.65	14.8	29.02	14.03	12.64
112	Rab23	uc011wix	5.3e-23	2.92	3.47	1.89	4.87	1.92	1.96	1.94	1.95	2.9	1.73	2.29
113	Dst	uc007aon	2.3e-12	40.28	34.28	32.42	40.58	29.73	32.09	34.31	29.11	44.4	29.3	15.38
114	Dst	uc007aoj	6.1e-14	51.44	44.9	42.02	52.49	36.01	39.58	43.58	35.4	55.22	36.4	17.68
115	Dst	uc007aoi	2.3e-12	41.76	35.55	33.62	42.12	30.92	33.34	35.65	30.28	46.11	30.46	31.23
116	Dst	uc007aol	3.9e-14	2.35	1.73	1.63	2.04	2.79	2.64	2.33	2.53	3.51	2.16	8.32
117	Dst	uc007aom	9.6e-10	46.17	35.19	36.35	47.67	34.91	38.18	39.24	32.69	56.46	35.46	20.77
118	Dst	uc007aoo	1.2e-18	99.01	99.29	79.58	96.5	69.05	70.49	79.5	77.19	91.77	67.68	48.67
119	Dst	uc007aop	9.4e-18	101.39	103.32	80.49	100	74.32	73.49	82.69	84.75	95.12	70.94	35.71
120	Imp4	uc007aor	6.9e-19	6.27	6.52	4.1	5.12	3.6	4.65	3.96	3.17	5.79	4.09	40.07
121	Ptpn18	uc007aos	5.5e-14	1.14	1.52	0.45	0.41	0.24	1.15	0.33	0.21	0.54	0.31	5.87
122	Ccdc115	uc011wja	8.2e-10	8.46	8.73	6.68	8.28	7.12	7.72	6.52	7.55	9.59	6.66	6.27
123	Arhgef4	uc007apf	1.1e-22	0.14	0.13	0.07	0.23	0.04	0.11	0.06	0.04	0.02	0.06	2.15
124	Arhgef4	uc007apg	1.5e-08	0.09	0.1	0.07	0.1	0.03	0.09	0.06	0.01	0.02	0.04	2.18
125	Arhgef4	uc007aph	4.7e-08	0.07	0.09	0.05	0.09	0.02	0.09	0.06	0.02	0.02	0.04	1.07
126	Fam168b	uc011wje	6.2e-17	18.59	18.49	12.01	18.78	11.97	14.28	11.82	10.82	16.19	12.43	9.46
127	Fam168b	uc011wjf	6.1e-17	18.65	18.54	12.05	18.83	12	14.32	11.85	10.85	16.24	12.46	18.94
128	Arhgef4	uc007api	8.4e-21	0.23	0.26	0.15	0.33	0.08	0.24	0.13	0.09	0.04	0.14	12.21
129	Plekhb2	uc007apk	7.4e-09	6.68	5.44	6.68	3.83	2.86	4.84	5.13	1.76	6.17	4.37	6.34
130	Fam168b	uc007apj	6.1e-17	18.73	18.62	12.1	18.91	12.05	14.38	11.9	10.89	16.3	12.51	13.14
131	Plekhb2	uc007apl	6.8e-23	51.31	49.55	38.79	25.51	34.06	34.02	36.81	33.49	48.33	39.78	31.58
132	Uggt1	uc007apo	1.8e-20	10.49	9.38	13.29	9.84	11.32	8	10.85	12.72	11.45	14.31	4.64
133	Uggt1	uc007app	7.2e-18	11.13	9.27	14.38	11.69	12.97	9.34	12.74	13.97	13.53	15.85	9.27
134	Uggt1	uc007apq	7.1e-18	11.17	9.3	14.43	11.73	13.02	9.37	12.78	14.02	13.58	15.91	9.28
135	Uggt1	uc007apr	2e-13	7.15	4.59	10.01	9.77	9.86	7.62	10.48	9.73	11.42	11.54	2.51
136	Hs6st1	uc007apn	1.2e-08	12.96	10.36	10.16	10.38	7.98	10.51	9.17	7.33	9.87	8.84	6.82
137	Arid5a	uc007apv	1.4e-19	2.68	2.02	0.8	2.79	0.38	1.47	0.7	0.3	1.43	0.58	6.77
138	Arid5a	uc011wjg	1.4e-19	2.68	2.02	0.8	2.79	0.38	1.47	0.7	0.3	1.43	0.58	1.98
139	Arid5a	uc007apw	1.4e-19	2.64	2	0.79	2.75	0.37	1.45	0.69	0.3	1.4	0.57	1.96
140	Arid5a	uc007apu	8.1e-20	2.71	2.04	0.8	2.84	0.39	1.49	0.72	0.31	1.45	0.59	2
141	Arid5a	uc007apx	1.1e-19	2.71	2.04	0.8	2.83	0.38	1.48	0.71	0.31	1.45	0.59	2
142	Arid5a	uc007apy	1.4e-19	2.55	1.93	0.76	2.66	0.36	1.4	0.67	0.29	1.36	0.55	1.94
143	Kansl3	uc011wji	6e-20	21.58	22.4	20.18	26.92	12.16	15.23	17.23	10.5	21.64	16.9	11.06
144	Kansl3	uc007apz	5.9e-20	21.6	22.42	20.19	26.92	12.17	15.25	17.24	10.51	21.66	16.91	21.8
145	Kansl3	uc007aqa	7.7e-20	21.35	22.22	19.93	26.74	12.08	15.08	17.1	10.43	21.36	16.79	21.74
146	Kansl3	uc011wjj	7.8e-20	21.69	22.58	20.27	27.24	12.3	15.34	17.4	10.63	21.71	17.11	21.85
147	Arid5a	uc011wjh	1.5e-19	2.15	1.63	0.64	2.23	0.31	1.18	0.57	0.24	1.14	0.47	11.82
148	Lman2l	uc007aqc	1.1e-22	10.31	13.86	7.53	4.3	5.9	8.18	6.8	6.11	9.55	6.63	4.13
149	Lman2l	uc007aqd	1.2e-21	17.16	22.7	12.75	6.77	9.78	13.66	11.31	10.09	15.69	11.09	11.02
150	Lman2l	uc007aqe	1.2e-21	17.38	22.99	12.91	6.85	9.91	13.83	11.45	10.22	15.88	11.23	13.85
151	Cnnm4	uc007aqg	2e-28	7.56	16.68	5.25	2.75	1.97	2.06	3.25	1.89	6.77	3.88	2.85
152	Cnnm3	uc007aqi	6.3e-17	3.95	4.13	3.86	4.35	2.55	3.4	2.82	2.53	2.58	2.97	5.33
153	Cnnm3	uc007aqj	5.7e-17	3.99	4.16	3.89	4.39	2.57	3.43	2.84	2.55	2.59	2.99	5.03
154	Cnnm3	uc007aqk	5.7e-17	4	4.16	3.89	4.39	2.57	3.43	2.84	2.55	2.6	3	5.06
155	Lman2l	uc007aqf	1.5e-21	17.52	23.19	13	6.94	9.97	13.85	11.5	10.27	16	11.35	9.56
156	Ankrd23	uc007aql	5.2e-16	721.55	323.13	1357.39	257.47	409.77	333.61	551.86	323.52	763.71	691.94	106.66
157	Ankrd23	uc011wjl	3.5e-16	750.19	335.74	1405.17	267.9	428.21	347.39	575.39	339.34	795.71	721.53	202.54
158	Ankrd23	uc007aqm	5.1e-16	717.24	321.23	1349.23	255.96	407.37	331.63	548.53	321.68	759.11	687.8	201.95
159	Ankrd23	uc007aqn	1.6e-16	708.12	316.04	1310.66	254.29	409.46	330.71	547.43	326.51	755.39	688.86	194.91
160	Ankrd39	uc007aqo	1.7e-15	5.14	5.78	5.08	3.5	2.83	2.72	3.06	3.15	3.58	3.48	97.7
161	Ankrd39	uc011wjm	1.7e-15	5.04	5.67	4.98	3.44	2.78	2.67	3	3.09	3.51	3.41	3.62
162	Ankrd39	uc007aqp	1.3e-15	4.65	5.23	4.64	3.18	2.56	2.46	2.77	2.84	3.24	3.15	3.44
163	Sema4c	uc007aqq	1.8e-18	5.51	7.91	3.23	3.42	1.52	2.46	2.3	1.15	3.44	1.88	6.39
164	Sema4c	uc007aqr	1.9e-18	5.27	7.54	3.09	3.26	1.45	2.35	2.2	1.1	3.29	1.8	6.39
165	Sema4c	uc007aqs	6.4e-08	0.73	0.76	0.33	0.2	0.04	0.15	0.11	0	0.2	0.05	3.4
166	Fam178b	uc007aqu	3.3e-11	1.17	7.28	1.15	1.37	0.4	0.67	0.6	0.13	0.68	0.37	1.27
167	Fam178b	uc011wjn	3.6e-12	0.53	2.87	0.46	0.53	0.16	0.29	0.24	0.06	0.27	0.15	1.41
168	Cnnm3	uc011wjk	2.9e-16	5.35	5.52	5.08	5.86	3.47	4.54	3.81	3.5	3.5	4.03	3.76
169	Cox5b	uc007aqw	7.5e-18	156.35	138.5	87.88	55.91	71.29	75.5	74.58	52.81	118.47	111.39	66.53
170	Actr1b	uc007aqx	1.1e-15	52.14	34.81	54.51	104.2	34.97	29.48	45.31	27.6	68.18	45.58	21.7
171	Tmem131	uc007arc	6.3e-29	19.77	17.52	10.44	20.11	9.45	12.77	10.66	8.4	20.42	10.03	32.26
172	Cnga3	uc007ari	1.5e-18	1.78	0.18	0.3	0.36	0.52	0.52	0.48	0.44	0.77	0.54	0.66
173	Inpp4a	uc007ark	1.7e-12	4.13	2.63	2.16	2.18	1.86	3.45	2.57	1.49	4.21	1.59	1.85
174	Tmem131	uc007ard	1.1e-26	17.03	13.27	9.46	21.13	9.23	12.79	10.92	8.43	20.55	9.54	9.69
175	Inpp4a	uc007arl	2.6e-29	10.09	6.24	3.74	4.41	4.69	6.72	4.99	5.09	8.59	3.67	11.73
176	Inpp4a	uc007arn	1.5e-18	4.59	3.49	2.15	2.46	2.29	3.79	2.71	2.05	4.63	1.71	4.21
177	Inpp4a	uc011wjq	1.2e-18	4.63	3.52	2.16	2.49	2.31	3.82	2.74	2.07	4.68	1.71	4.23
178	Inpp4a	uc011wjr	1.2e-18	4.63	3.52	2.16	2.49	2.31	3.83	2.75	2.08	4.68	1.72	2.13
179	Unc50	uc007arp	3.5e-18	17.48	16.75	10.4	17.35	11.2	11.63	11.22	12.19	15.83	11.28	12.65
180	Coa5	uc007aro	8.3e-21	83.6	55.22	69.52	33.31	97.97	61.64	78.4	108.31	73.81	101.53	37.45
181	Mgat4a	uc007arr	1.3e-07	3.78	2.93	1.78	2.38	2.36	2.93	2.26	2.28	3.32	2.61	29.43
182	Mgat4a	uc007aru	1e-07	3.65	2.83	1.72	2.3	2.24	2.84	2.18	2.18	3.23	2.5	4.89
183	Mgat4a	uc007art	1e-07	3.64	2.82	1.72	2.29	2.24	2.83	2.17	2.17	3.21	2.49	4.78
184	Mgat4a	uc007arv	1e-07	3.62	2.8	1.7	2.28	2.22	2.81	2.16	2.15	3.19	2.47	4.76
185	2010300C02Rik	uc007arx	1.7e-15	0.56	0.19	0.08	0.08	0.04	0.16	0.05	0.05	0.14	0.13	2.51
186	2010300C02Rik	uc007arw	1.2e-12	0.62	0.22	0.08	0.1	0.05	0.19	0.07	0.06	0.15	0.17	5.48
187	Tsga10	uc007arz	1.4e-22	1.42	1.51	1.1	1.24	1.78	1.16	1.66	2.08	5.63	1.54	1.17
188	Tsga10	uc007asa	1.4e-22	1.75	1.8	1.37	1.5	2.22	1.43	2.06	2.57	6.93	1.92	1.47
189	Tsga10	uc007asb	3.6e-22	1.85	1.9	1.46	1.56	2.35	1.52	2.2	2.75	7.29	2.04	1.52
190	Tsga10	uc007asc	3.3e-22	1.71	1.76	1.35	1.45	2.18	1.41	2.04	2.55	6.76	1.89	1.5
191	Tsga10	uc007asd	3.3e-17	2.53	2.71	2.15	1.61	3.72	2.27	2.83	4.75	8.91	3.15	2.26
192	Tsga10	uc007ase	3.3e-17	2.54	2.73	2.16	1.62	3.74	2.29	2.85	4.78	8.96	3.17	2.61
193	Unc50	uc007arq	3.4e-18	20.73	19.91	12.35	20.64	13.32	13.83	13.33	14.49	18.83	13.42	13.81
194	Lipt1	uc007ash	3.5e-11	5.73	3.89	3.58	3.32	4.69	4.25	4.27	4.86	5.81	4.82	2.29
195	Tsga10	uc007asf	3.4e-17	2.57	2.76	2.19	1.64	3.79	2.31	2.88	4.83	9.07	3.2	3.61
196	Mitd1	uc007asi	1.3e-10	4.56	4.93	1.86	2.72	3.14	3.83	2.2	3.14	2.8	2.2	6.6
197	Lyg1	uc007asl	3.6e-31	0	0	0	0	0	0.24	0.02	0	0.03	0	125.04
198	Txndc9	uc007asm	2.3e-07	7.92	8.41	4.96	7.73	8.85	6.75	7.2	10.52	8.13	7.13	130.13
199	Mrpl30	uc007asj	2e-16	137.6	132.14	97.74	76.25	108.63	96.63	106.51	108.4	112.02	108.7	69.41
200	Txndc9	uc007asn	2.2e-07	7.9	8.41	4.96	7.74	8.87	6.74	7.2	10.54	8.12	7.13	69.42
201	Rev1	uc007asp	1.4e-11	13.01	12.34	11.6	18.82	14.37	12.45	13.04	14.38	12.64	14.33	10.41
202	Rev1	uc007asq	2.2e-12	10.66	9.78	9.77	16.13	12.12	10.61	11.13	12.02	10.72	11.93	9.57
203	Rev1	uc007asr	4.7e-13	10.88	9.85	10.01	16.73	12.28	10.91	11.45	12.32	11.04	12.13	8.54
204	Aff3	uc007ass	1.4e-14	0.7	0.95	0.43	2.58	0.63	1.25	0.71	0.64	0.42	0.38	3.57
205	Eif5b	uc007aso	1e-07	24.5	20.74	19.97	26.53	25.49	22.34	23.95	29.19	30.09	22.83	9.23
206	Lonrf2	uc007asx	6.6e-22	0.61	1.46	0.49	0.1	0.24	0.34	0.31	0.34	0.16	0.27	0.98
207	Pdcl3	uc007atc	1.4e-17	28.88	29.88	26.86	41.92	29.93	26.58	32.08	25.07	40.91	30.94	17.06
208	Npas2	uc007atd	4.8e-16	1.52	2.18	0.79	1.69	0.45	0.7	0.84	0.39	1.37	0.34	18.24
209	Rpl31	uc007ate	6.2e-12	1.87	1.95	0.92	2.16	2.28	1.67	2.15	2.17	1.44	1.57	4.21
210	Rpl31	uc029qnx	2.5e-17	2.86	3.37	1.36	2.46	3.69	2.58	2.83	3.61	2.49	2.42	8.34
211	Rpl31	uc029qnw	2.6e-17	3.22	3.77	1.52	2.77	4.16	2.91	3.2	4.07	2.81	2.73	11.34
212	Tbc1d8	uc007atg	8.1e-23	6.63	5.67	5.02	3.15	4.07	5.06	4.31	3.76	3.87	3.92	4.12
213	Rpl31	uc007atf	2.6e-17	3.44	4.03	1.63	2.97	4.45	3.11	3.42	4.35	3	2.92	10.55
214	Cnot11	uc007ati	1e-08	10.7	11.26	11.61	14.05	13.74	12.58	12.47	15.8	11.3	12.97	11.89
215	Tbc1d8	uc007ath	9.9e-18	5.18	4.14	4.4	2.48	2.74	3.9	3.39	2.38	2.98	2.94	8.95
216	Rnf149	uc007atl	3.3e-11	4.74	4.73	4.07	6.03	4.62	5.29	4.84	4.88	4.41	5.25	6.25
217	Gm3646	uc007ato	4e-10	3.25	2.51	0.46	0.11	1.62	0.18	0.57	1.68	3.42	1.32	0.52
218	Cnot11	uc007atj	1.6e-08	14.4	15.21	15.65	18.93	18.65	17.05	16.92	21.46	15.27	17.49	7.36
219	Map4k4	uc011wjv	4.7e-24	13.48	14.63	4.86	11.44	6.48	6.44	6.67	5.54	15.63	4.9	14.02
220	Map4k4	uc011wjw	5.7e-24	14.05	15.25	5.11	12	6.72	6.78	6.96	5.77	16.2	5.12	13.64
221	Map4k4	uc011wjx	6.3e-24	13.9	15.13	5.03	11.88	6.7	6.69	6.9	5.76	16.03	5.07	13.86
222	Map4k4	uc007atr	4.8e-24	13.85	15.03	5	11.76	6.67	6.62	6.86	5.7	16.06	5.04	13.72
223	Map4k4	uc007ats	4.1e-24	13.45	14.55	4.87	11.4	6.41	6.43	6.64	5.48	15.57	4.88	6.67
224	Il1r2	uc007atu	1.5e-11	0.13	1.65	0.31	1.09	0.78	0.8	0.58	1.55	0.49	0.46	9.56
225	Il1r2	uc011wjy	5e-11	0.16	1.94	0.34	1.17	0.83	0.87	0.63	1.76	0.5	0.51	6.27
226	Il1r1	uc007atv	4.7e-14	4.35	5.2	2.31	7.32	5.41	4.4	3.83	5	3.76	3.3	5.69
227	Il1r1	uc007atw	5.6e-14	4.27	5.12	2.27	7.2	5.32	4.32	3.77	4.93	3.7	3.25	4.61
228	Il1rl2	uc007atx	3.8e-16	0.58	1.06	0.38	1.53	1.02	1.14	0.66	1.46	0.41	0.53	4.21
229	Il1rl2	uc007aty	2.1e-16	0.63	1.13	0.4	1.63	1.1	1.22	0.71	1.56	0.42	0.56	3.97
230	Slc9a4	uc007aul	6.6e-10	0.54	0.24	0.43	0.59	0.47	1.26	0.55	0.32	1.9	0.3	0.32
231	Slc9a2	uc007aum	3e-14	7.91	8.17	7.7	3.06	5.91	8.44	8.73	5.17	13.9	5.79	2.51
232	Slc9a2	uc007aun	1.5e-31	19.4	28.09	16.37	6.83	18.79	18.89	20.5	18.55	32.1	16.4	5.89
233	Mfsd9	uc007aup	3.1e-07	0.69	0.48	0.39	0.52	0.52	0.43	0.46	0.56	0.72	0.43	5.87
234	Tmem182	uc007auq	3.3e-10	202.06	152.58	169.62	203.34	175.71	202.2	194.38	168.52	223.23	196.95	69.49
235	Pou3f3	uc007auw	2.6e-10	0	0	0	0	0	0.14	0	0	0.01	0	69.5
236	Mrps9	uc007auz	1.4e-13	7.7	5.89	3.7	3.05	4.34	4.39	4.21	4.82	6.73	4.52	2.7
237	Mrps9	uc007ava	5.4e-27	41.55	34.35	20.94	16.31	18.99	21.36	20.78	19.15	32.42	21.84	20.12
238	Mrps9	uc007avb	2.1e-18	34.85	27.74	16.47	14.59	19.64	19.41	19.49	20.56	29.92	21.56	30.15
239	Tgfbrap1	uc007ave	3.5e-15	7.47	7.22	6.61	9.58	5.78	5.97	6.49	5.23	8.23	6.49	3.64
240	Tgfbrap1	uc007avf	2.4e-15	6.99	6.73	6.17	8.94	5.39	5.57	6.05	4.89	7.67	6.04	7.02
241	Tgfbrap1	uc007avg	4.9e-07	1.81	1.54	1.43	1.98	1.21	1.28	1.42	0.91	1.79	1.39	4.08
242	Tgfbrap1	uc007avh	5e-09	2.26	1.72	2.21	3.28	1.28	1.88	2.06	0.8	2.5	1.45	0.92
243	Fhl2	uc007avk	2.2e-33	29.7	23.23	1.23	2.63	1.66	18.87	0.98	0.54	23.06	0.37	17.11
244	Fhl2	uc007avl	1.8e-33	33.15	26.15	1.36	2.91	1.84	21.04	1.08	0.6	25.57	0.41	18.12
245	Nck2	uc007avo	1.2e-14	3.75	3.84	4.19	2.75	3.35	4.81	3.52	3.6	2.5	2.91	20.54
246	Uxs1	uc007avq	1e-07	3.76	6.53	4.34	7.08	5.42	4.85	5.35	5.37	4.78	5.77	2.68
247	1500015O10Rik	uc007avp	2.3e-08	0.67	0.52	0.41	4.13	2.55	4.14	2.73	1.18	0.18	1.05	3.1
248	Tpp2	uc007avr	1.2e-12	8.7	5.62	7.89	14.58	13.97	11.94	13.56	14.11	14.52	11.28	3.66
249	Tpp2	uc011wkb	7.7e-11	19.76	14.86	16.74	28.03	29.75	25.17	26.75	32.77	29.36	22.56	11.27
250	Tpp2	uc007avs	2.6e-07	21.05	17.22	16.91	26.47	28.37	24.65	25.77	32.87	28.73	21.33	18.25
251	Tpp2	uc007avt	2.6e-07	21.22	17.36	17.05	26.69	28.6	24.86	25.98	33.14	28.97	21.51	20.54
252	Uxs1	uc011wka	1.1e-07	4.07	7.06	4.69	7.64	5.86	5.24	5.78	5.8	5.17	6.24	13.21
253	Mettl21c	uc007avv	4e-29	0.76	22.24	21.04	5.85	306.01	154.74	190.3	261.89	120.93	144.91	3.88
254	Mettl21c	uc007avw	1.7e-23	0.17	6.03	3.88	1.39	52.98	28.73	35.77	43.64	29.74	25.88	1.2
255	Kdelc1	uc007awb	1.4e-14	7.04	9.11	3.91	6.1	4.86	4.61	4.45	4.94	5.19	4.09	6.35
256	Kdelc1	uc011wkc	4e-14	7.18	9.31	3.98	6.31	5.06	4.73	4.62	5.1	5.36	4.2	7.2
257	Bivm	uc007awd	6.7e-08	3.61	3.78	2.94	3.12	4.91	3.42	3.87	5.9	2.8	4.16	17.44
258	Bivm	uc007awe	6.2e-08	3.8	3.98	3.1	3.28	5.17	3.61	4.08	6.22	2.94	4.38	4.67
259	Bivm	uc007awf	6.4e-08	3.59	3.77	2.93	3.09	4.87	3.42	3.85	5.87	2.78	4.12	4.67
260	Ercc5	uc007awh	2.3e-18	8.06	10.27	5.41	9.26	6.03	5.55	6.48	5.69	9.07	5.57	4.03
261	Ercc5	uc007awi	9.4e-19	8.66	11.46	5.74	9.82	6.66	5.7	6.83	6.48	9.41	6.26	8.55
262	Kdelc1	uc007awc	1e-15	5.33	6.63	2.96	4.44	3.53	3.54	3.4	3.24	4.05	3.07	7.22
263	Ercc5	uc007awj	2.4e-18	8.58	10.93	5.76	9.85	6.41	5.9	6.9	6.06	9.66	5.93	6.82
264	Gulp1	uc007awl	3.3e-13	2.37	3.75	1.02	2.89	1.56	1.55	1.46	1.59	1.47	0.94	5.07
265	Gulp1	uc007awm	2.5e-08	2.87	5.02	1.53	4.36	2.12	2.59	2.03	2.49	1.99	1.32	2.48
266	Mettl21e	uc007awk	5.5e-36	29.91	25.92	1.5	1.31	3.3	0.82	1.71	4.3	2.41	2.52	16.21
267	Gulp1	uc007awn	2.1e-08	2.93	5.13	1.57	4.45	2.16	2.65	2.07	2.54	2.03	1.33	16.24
268	Col5a2	uc007awr	2.1e-07	8.45	10.68	5.96	22.42	14.42	8.45	9.56	9.71	7.17	5.69	6.39
269	Col3a1	uc007awq	8.2e-07	93.21	85.3	38.11	135.41	122.63	61.86	68.06	88.14	46.05	48	56.02
270	Col5a2	uc007aws	2.3e-08	3.78	4.26	2.58	12.29	5.47	4.07	4.96	2.88	3.35	2.32	2.67
271	Slc40a1	uc007awu	1.1e-33	6.67	22	15.29	1.55	31.35	15.08	18.58	32.66	8.16	31.65	5.49
272	Slc40a1	uc007awv	2.4e-29	1.15	2.94	2.99	0.26	4.98	2.71	3.53	3.96	1.61	5.88	6.37
273	Slc40a1	uc011wkh	7.6e-26	5.1	12.89	14.09	1.19	20.99	12.79	15.93	15.3	7.43	26.02	5.15
274	Slc40a1	uc011wki	6.9e-28	4.73	12.23	13.38	1.07	19.97	12.06	14.62	15	7.14	25.07	8.26
275	Slc39a10	uc007axc	5.8e-09	3.66	4.19	2.7	4.89	3.17	3.47	3.38	3.52	4.82	2.66	3.33
276	Slc39a10	uc007axd	2e-09	2.66	2.81	2.25	4.06	2.42	2.9	2.96	2.16	4.01	2.13	4.88
277	Tmeff2	uc007axj	9e-16	1.28	2.99	0.49	0.99	1.01	0.87	0.87	1.48	0.55	0.49	0.97
278	Nabp1	uc007axm	3.4e-13	4.78	3.57	2.28	1.01	8.35	3.99	3.44	10.87	3.23	4.72	1.24
279	Nabp1	uc007axn	1.9e-15	8.6	5.3	4.86	1.86	16.48	9.27	6.81	22.36	6.48	9.76	3.78
280	Nabp1	uc007axo	1.9e-15	10.4	6.38	5.87	2.26	20.21	11.3	8.33	27.39	7.87	11.96	5.65
281	Nabp1	uc007axp	1e-15	8.46	5.2	4.79	1.8	16.24	9.06	6.7	21.63	6.38	9.67	5.5
282	Myo1b	uc007axr	8.4e-07	7.95	8.54	5.41	7.16	6.05	5.22	5.67	6.17	7.06	6.6	6.59
283	Myo1b	uc007axs	8.5e-07	7.81	8.39	5.32	7.04	5.94	5.13	5.57	6.07	6.94	6.49	6.54
284	Myo1b	uc007axt	1.6e-12	6.36	7	4.58	6.45	4.39	4.24	5	4.06	5.85	4.92	8.48
285	Myo1b	uc007axu	1.3e-07	1.03	1.13	0.77	1.08	0.67	0.68	0.79	0.65	1.08	0.81	2.52
286	Sdpr	uc007axk	1e-20	53.83	56.45	26.31	13.42	25.2	30.01	28.13	26.97	38.96	28.45	16.5
287	Stat1	uc007axy	6e-12	8.49	5.9	4.32	2.92	5.37	8.83	5.07	4.7	6.52	4.6	2.73
288	Stat1	uc007axz	1.2e-13	13.65	9.84	6.69	4.41	6.72	13.48	7.46	6.08	9.66	6.56	7.46
289	Stat1	uc007ayb	3e-15	13.33	10.39	6	4.24	7.34	11.97	6.97	7.62	9.21	7.03	9.61
290	Stat1	uc007aya	3e-15	13.29	10.36	5.98	4.23	7.31	11.94	6.95	7.59	9.19	7.01	9.61
291	Stat1	uc007ayc	2.9e-15	13.36	10.42	6	4.25	7.36	12	6.99	7.64	9.24	7.06	9.62
292	Gls	uc007aye	3.8e-18	11.56	12.38	15.63	18.55	25.38	18.48	19.06	32.07	14.33	24.67	6.32
293	Gls	uc011wko	4.3e-07	15.86	15.47	14.19	17.57	26.65	24.49	20.58	32.37	20.79	23.63	19.39
294	Stat1	uc007ayd	2.7e-15	14.07	11.43	6.08	4.43	7.6	12.19	7.15	8.36	9.52	7.45	14.02
295	Tmem194b	uc011wkp	4.6e-08	1.17	1.6	0.78	1.67	0.82	1.85	0.67	0.7	0.85	0.81	1.14
296	Tmem194b	uc029qoj	4.2e-08	1.18	1.61	0.79	1.69	0.83	1.87	0.68	0.7	0.86	0.82	2.29
297	Tmem194b	uc007ayk	2.6e-08	1.22	1.65	0.79	1.68	0.84	1.88	0.66	0.71	0.88	0.86	2.4
298	Tmem194b	uc029qok	4.6e-08	1.18	1.61	0.78	1.7	0.84	1.88	0.69	0.69	0.87	0.83	2.4
299	Nab1	uc007ayh	2.7e-15	6.06	6.54	3.15	6.59	4.54	4.24	3.71	5	4.32	4.04	6.67
300	Mfsd6	uc007ayl	5e-31	5.74	7.94	2.81	9.86	3.35	3.92	3.76	3.6	4.83	3.35	12.93
301	Mfsd6	uc007aym	8.7e-24	3.75	4.47	1.8	6.57	1.81	2.58	2.47	1.63	3.42	1.97	10.2
302	Mfsd6	uc007ayn	3.9e-20	3.28	3.97	1.6	6.09	1.73	2.51	2.32	1.66	3.2	1.89	5.13
303	Tmem194b	uc029qol	8.2e-09	0.69	0.96	0.43	0.98	0.48	1.08	0.38	0.4	0.51	0.49	3.09
304	Hibch	uc011wkr	4.5e-14	22.08	12.51	12.56	5.42	6.22	10.4	11.1	4.96	18.75	9.96	8.2
305	Inpp1	uc007ayo	6.4e-14	3.62	4.72	2.39	2.81	1.76	2.82	2.51	1.65	4.37	2.39	9.11
306	Hibch	uc007ayp	5.9e-15	48.15	38.51	24.49	19.25	44.38	31.86	36.11	51.59	46.68	42	19.37
307	Mstn	uc007ayt	4.3e-31	8.02	25.69	19	25.5	78.31	36.86	49.44	76.32	0.75	26.82	7.42
308	Pms1	uc007ayv	2.2e-08	1.19	1.44	0.96	1.53	1.98	1.62	1.7	2.26	1.03	1.63	8.2
309	Ormdl1	uc011wks	1.4e-11	5.04	7.36	6.33	4.18	9.63	8.35	7.28	12.63	4.86	8.06	4.09
310	Osgepl1	uc007aza	1.5e-11	22.62	22.26	21.33	15.31	27.54	20.67	22.49	32.26	20.4	29.35	14.17
311	Osgepl1	uc007azb	2.7e-11	30.12	30.21	28.23	19.96	36.67	27.89	29.7	44.61	26.77	38.78	24.26
312	Osgepl1	uc007azc	1.6e-11	30.79	30.94	29.07	20.29	37.65	28.79	30.6	46.01	27.52	39.74	28.1
313	Osgepl1	uc011wkt	2.8e-11	28.9	28.98	27.08	19.15	35.17	26.77	28.48	42.79	25.68	37.19	27.53
314	Pms1	uc007ayx	3.8e-08	1.13	1.23	0.92	1.46	1.84	1.61	1.72	2.07	1.03	1.58	14.02
315	Asnsd1	uc007aze	6.3e-13	44.49	43.34	46.57	45.41	83.52	56.42	62.23	93.66	52.2	69.92	19.83
316	Asnsd1	uc007azf	2.6e-10	110.58	125.4	101.68	102.36	155.71	116.04	128.92	151.1	108.92	150.06	82.05
317	Asnsd1	uc007azg	5.7e-13	72.38	72.81	73.54	71.88	129.01	89.25	97.52	141.97	82.25	109.95	83.08
318	Asnsd1	uc007azh	1.5e-10	67.9	73.21	65.35	67.38	97.73	75.32	82.86	104.14	68.79	90.87	62.85
319	Asnsd1	uc011wku	9.4e-13	62.45	59.85	65.59	63.44	120.73	81.12	88.34	137.16	74.54	99.31	57.7
320	Stk17b	uc007azj	1e-10	4.5	3.54	2.97	10.33	6.88	15.63	4.62	8.81	3.14	4.9	3.76
321	Osgepl1	uc007azd	3.9e-09	26.11	28.5	23.35	15.7	29.5	23.95	22.91	38.69	21.76	29.75	15.45
322	Ankrd44	uc011wkz	1.4e-08	3.09	3.13	2.28	1.68	3.92	3.41	2.5	5.07	1.49	2.43	2.21
323	Sf3b1	uc007azw	3.2e-07	26.38	30.68	17.37	38.12	28.19	26.6	23.05	32.31	23.56	23.91	17.37
324	Sf3b1	uc007azx	1.3e-08	37.73	41.22	26.62	62.95	42.22	42.26	36.26	45.08	36.85	33.81	37.76
325	Sf3b1	uc007azy	1.9e-14	18.9	19.94	13.51	32	16.67	23.49	16.84	15.92	18.32	14.5	14.38
326	Hspe1	uc007bac	1.1e-11	52.43	39.69	22.67	16.07	31.58	30.59	27.04	43.13	30.93	25.88	29.73
327	Hspd1	uc007bab	1.9e-17	69.53	50.29	32.25	21.67	51.33	46.26	47.58	59.82	48.91	47.6	24.02
328	Rftn2	uc011wla	5.6e-14	1.98	3.21	1.27	2.26	1.39	1.36	1.15	1.2	1.41	1.05	24.31
329	Rftn2	uc007bag	3.9e-17	2.01	3.08	1.2	2.38	1.3	1.31	1.17	1.07	1.45	1.03	2.01
330	Rftn2	uc007bah	2e-14	2.19	3.02	1.04	2.88	1.08	1.2	1.29	0.71	1.68	1.04	1.23
331	Mars2	uc007baj	1.7e-08	4.2	3.5	3.1	2.33	3.05	3.72	2.98	3.06	4.12	3.44	1.74
332	Plcl1	uc007ban	5.8e-27	2.07	6.47	2.21	3.14	3.32	10.33	4.54	2.62	1.48	3.69	2.78
333	9430016H08Rik	uc007bbc	3.2e-08	13.76	14.76	10.46	12.37	17.33	11.88	12.33	20.41	12.78	14.09	5.86
334	Spats2l	uc007bbd	5.5e-20	2.95	2.46	0.84	2.43	1.14	1.2	1.23	1.06	1.97	0.91	7.76
335	Spats2l	uc007bbe	6.1e-20	3.08	2.58	0.87	2.54	1.19	1.26	1.28	1.11	2.05	0.95	2.36
336	Sgol2	uc011wlj	2.7e-16	1.28	0.16	0.09	0.34	0.36	0.22	0.26	0.2	3.02	0.09	1.15
337	Sgol2	uc007bbk	4.7e-16	1.15	0.14	0.08	0.31	0.33	0.2	0.24	0.18	2.73	0.08	1.05
338	Aox1	uc007bbl	2.4e-32	22.02	21.37	6.72	23.5	11.28	8.43	12.45	10.54	26.93	10.58	13.19
339	Aox3	uc007bbm	9.5e-15	0.33	0.71	0.01	0.05	0.1	0.18	0.03	0.13	0.02	0.04	13.45
340	Aox3	uc007bbn	1.2e-14	0.35	0.76	0.01	0.05	0.11	0.19	0.04	0.13	0.02	0.05	1.55
341	Aox4	uc007bbo	2.2e-16	0.01	4.79	0.02	0.03	0.02	0.25	0.01	0	0.02	0.01	12.73
342	Aox2	uc007bbp	3.1e-08	0.01	0.06	0.09	0.05	0.03	0.02	0.03	0.06	0	0.02	11.96
343	Ppil3	uc007bbw	1.9e-09	9.59	10.89	8.39	7.25	14.14	8.81	9.4	15.16	10.35	11.56	32.22
344	Ppil3	uc007bbv	1.7e-09	12.43	14.01	10.98	9.36	18.45	11.4	12.14	19.76	13.47	15.04	12.29
345	Ppil3	uc007bbx	2.5e-09	14.9	16.68	12.98	11.16	22.2	13.65	14.54	23.82	16.14	18.09	15.17
346	Nif3l1	uc007bbz	2.1e-15	8.16	8.3	6.34	5.78	7.38	5.9	6.47	6.87	6.67	7.9	24.04
347	Nif3l1	uc007bca	1.2e-10	5.69	5.68	4.82	4.25	4.92	4.2	4.48	4.28	4.56	5.82	7.97
348	Ppil3	uc007bby	9.7e-09	5.99	6.64	5.65	4.95	9.62	5.64	6.05	10.05	6.77	7.84	8.81
349	Orc2	uc007bcc	2.1e-08	9.83	10.84	7.93	14.5	14.87	10.56	10.83	17.52	12.3	11.8	7.84
350	Orc2	uc007bce	9.8e-09	8.59	9.4	6.96	12.83	13.14	9.25	9.55	15.38	10.89	10.44	8.59
351	Nif3l1	uc007bcb	2e-15	9.5	9.67	7.35	6.68	8.63	6.86	7.51	8.06	7.78	9.21	9.55
352	Orc2	uc007bcd	9.8e-09	8.58	9.38	6.94	12.81	13.12	9.23	9.53	15.36	10.87	10.42	4.04
353	Ndufb3	uc007bck	5.8e-24	250.42	223.68	120.68	111.42	122.57	115.98	142.98	112.8	254.67	158.24	94.85
354	Cflar	uc007bcn	7.3e-08	9.69	9	6.39	7.04	8.22	9.91	8.16	8.52	8.53	6.9	9.07
355	Cflar	uc007bco	4.6e-08	9.78	9.1	6.45	7.13	8.24	9.98	8.2	8.54	8.6	6.94	9.08
356	Cflar	uc007bcp	6.3e-12	1.1	1.18	0.67	1.15	0.52	0.92	0.75	0.37	1.06	0.44	5.12
357	Cflar	uc007bcq	2.8e-08	9.52	8.88	6.28	6.99	7.93	9.67	7.94	8.2	8.34	6.7	5.01
358	Cflar	uc007bcr	4.3e-09	2.21	2.21	1.09	1.95	0.82	1.53	1.25	0.83	1.48	1.33	5.71
359	Casp8	uc007bcs	1.2e-08	5.57	4.52	2.11	3.51	3.43	5.24	2.91	3.14	3.98	2.83	7.97
360	Casp8	uc007bct	1.2e-08	5.73	4.64	2.13	3.64	3.55	5.47	3	3.29	4.12	2.9	6.33
361	Stradb	uc007bcw	3.8e-25	5.41	3.48	6.6	4.51	7.72	6.31	7.52	8.55	6.71	6.75	4.58
362	Stradb	uc007bcx	6e-27	33.67	21.06	41.14	29.49	63.64	40.71	51.23	73.49	45.01	57.44	10.77
363	Stradb	uc007bcy	8.7e-30	58.33	38.96	71.57	41.29	100.21	63.48	79.36	116.31	68.77	94.28	25.79
364	Stradb	uc007bcz	1.6e-29	58.77	39.44	71.72	41.61	102.22	63.76	79.6	118.84	68.93	95.52	33.21
365	Trak2	uc007bcv	3.8e-29	84.68	36.56	32.8	33.88	44.37	38.52	44.48	46.28	89.14	44.57	33.51
366	Tmem237	uc007bdd	6.4e-14	2.41	3.29	2.02	3.02	1.96	1.49	1.8	1.8	1.58	1.73	1.63
367	Tmem237	uc007bde	7e-14	2.36	3.22	1.98	2.96	1.91	1.46	1.76	1.76	1.55	1.69	3.21
368	Tmem237	uc007bdf	5.7e-14	2.4	3.26	2	3	1.94	1.48	1.78	1.77	1.56	1.71	3.19
369	Mpp4	uc007bdg	2.3e-10	1.35	1.97	1.35	1.26	0.76	0.95	1.03	0.63	1.03	1.01	0.81
370	Stradb	uc007bda	5.3e-29	27.14	17.7	32.92	20.62	47.27	29.21	38.2	51.06	33.11	46.04	11.27
371	Cdk15	uc007bdr	1.8e-07	0.19	0.51	0.28	0.23	0.15	0.07	0.15	0.05	0.18	0.15	8.1
372	Fzd7	uc011wlq	3.2e-11	10.82	14.26	11.4	17.74	17.36	17.23	13.05	21.04	8.89	10.38	6.33
373	Gm973	uc007bdv	1.2e-15	0.02	0.36	0.22	1.07	0.21	0.26	0.13	0.27	0.14	0.07	0.05
374	Bmpr2	uc007bdz	8e-08	10.95	15.21	10.17	20.01	20.27	12.89	16.79	24.82	12.92	15.91	6.06
375	Wdr12	uc007bee	7.6e-10	5.54	5.16	5.9	6.34	8.18	6.12	7.3	8.76	5.89	7.32	2.56
376	Wdr12	uc007bef	6.2e-10	5.66	5.27	6	6.47	8.37	6.2	7.43	8.91	6.03	7.47	5.16
377	Fam117b	uc011wlt	2.3e-10	3.3	3.19	1.7	3.85	2.27	2.62	2.29	2.62	2.71	2.23	5.54
378	Nbeal1	uc007bej	9.6e-08	1.7	1.47	0.79	2.14	1.76	1.8	1.1	2.12	2.07	1.49	0.74
379	Nbeal1	uc007bek	1.4e-08	0.64	0.46	0.22	0.84	0.61	0.6	0.36	0.71	0.92	0.43	1
380	Nbeal1	uc011wlx	2e-07	2.29	1.98	1.06	2.74	2.32	2.42	1.45	2.84	2.71	1.97	1.25
381	Nbeal1	uc011wly	5.2e-07	2.91	2.56	1.39	3.48	3	3.15	1.88	3.69	3.42	2.59	2.3
382	Cyp20a1	uc007bem	7.8e-08	5.37	5.82	3.9	7.67	5.27	4.22	4.71	4.78	4.26	4.28	3.01
383	Cyp20a1	uc007ben	2.1e-12	7.29	8.45	5.11	10.39	6.61	5.43	5.96	6.09	5.84	5.44	6.32
384	Cyp20a1	uc007beo	2.5e-12	7.8	9.11	5.47	11.38	7.18	5.8	6.44	6.6	6.26	5.81	7.87
385	Abi2	uc007bep	1.8e-18	2.24	5.31	1.93	7.06	3.24	1.44	2.73	3.97	2.8	2.58	5.45
386	Abi2	uc007ber	3.3e-19	2.21	5.11	1.97	7.1	3.19	1.5	2.77	3.86	2.9	2.6	2.71
387	Wdr12	uc007beg	5.7e-10	5.17	4.82	5.51	5.92	7.65	5.68	6.8	8.13	5.51	6.83	3.71
388	Abi2	uc007beq	3.3e-19	2.25	5.2	2.01	7.22	3.24	1.52	2.81	3.92	2.95	2.64	3.74
389	Raph1	uc007bet	3.4e-18	11.73	8.16	4.24	12.11	6.1	5.44	7.61	6.12	14.11	4.58	4.46
390	Cd28	uc007bew	1.8e-15	1.26	0.39	0.6	0.71	3.27	3.08	1.4	5.91	1.77	0.53	4.9
391	Pard3b	uc007bfe	1.5e-21	2.26	2.4	1.42	3.11	1.6	1.58	2	1.52	2.71	1.75	0.86
392	Pard3b	uc011wma	4.4e-21	2.47	2.65	1.55	3.41	1.76	1.73	2.19	1.68	2.96	1.93	1.8
393	Nrp2	uc007bfi	2.4e-12	2.02	1.67	0.91	0.95	0.72	0.93	0.92	0.51	1.28	0.9	1.32
394	Nrp2	uc007bfj	9.2e-20	4.3	3.5	1.98	1.86	1.3	1.96	1.71	0.92	2.34	1.69	1.34
395	Nrp2	uc007bfk	9.3e-20	4.3	3.51	1.99	1.86	1.3	1.97	1.71	0.92	2.34	1.69	1.92
396	Nrp2	uc007bfl	7.3e-23	7.11	5.74	3.08	2.79	2.65	3.31	2.7	2.3	3.87	3.21	2.79
397	Nrp2	uc007bfm	7.4e-23	7.13	5.75	3.09	2.8	2.66	3.31	2.71	2.31	3.88	3.22	3.66
398	Nrp2	uc007bfo	7.8e-23	7.17	5.79	3.11	2.81	2.67	3.34	2.72	2.32	3.91	3.24	3.68
399	Nrp2	uc007bfn	8.2e-23	7.16	5.77	3.1	2.81	2.67	3.33	2.72	2.32	3.9	3.23	3.68
400	Ino80d	uc011wmb	4.1e-07	3.52	3.55	2.28	3.42	2.79	3.91	2.68	3.23	2.97	2.61	1.9
401	Nrp2	uc007bfp	1.5e-16	3.03	2.37	1.36	1.3	0.96	1.45	1	0.78	1.52	1.12	2.76
402	Ino80d	uc011wmc	4e-07	3.5	3.53	2.27	3.4	2.77	3.89	2.66	3.21	2.95	2.59	2.23
403	Ndufs1	uc011wmd	2.5e-20	406.82	317.62	245.52	137.34	336.85	297.73	296.43	319.06	375.78	394.12	135.99
404	Ndufs1	uc007bfy	4.1e-20	427.86	334.55	257.65	144.5	355.46	313.21	312.12	337.02	395.77	415.59	274.94
405	Ndufs1	uc007bfv	2.7e-20	421.16	329.01	254.36	142.31	349.17	308.46	307.24	330.75	388.98	408.5	279.68
406	Ndufs1	uc007bfu	4.6e-20	443.78	347.25	267.44	150.03	369.23	325.11	324.16	350.1	410.48	431.62	284.93
407	Ndufs1	uc007bfw	1.3e-17	349.12	237.19	216.92	128.67	335.55	281.17	284.98	313.97	346.04	377.63	255.56
408	Eef1b2	uc007bfz	6.6e-23	78.5	84.17	52.98	68.81	65.29	72.85	61.23	59.61	70.7	55.7	79.51
409	Ndufs1	uc007bfx	2.8e-19	229.4	152.05	146.2	84.03	204.73	180.49	182.52	185.65	225.68	236.65	150.16
410	Zdbf2	uc007bgc	1.1e-19	0.57	1.77	0.24	0.69	0.35	1.12	0.23	0.34	0.26	0.25	1.06
411	Zdbf2	uc007bgb	1.1e-19	0.57	1.76	0.24	0.68	0.35	1.12	0.23	0.34	0.25	0.24	1.06
412	Adam23	uc007bgf	1e-15	0.36	1.31	0.19	0.9	0.39	0.57	0.29	0.4	0.31	0.26	0.36
413	Adam23	uc007bgg	3.4e-14	0.43	1.65	0.28	0.94	0.47	0.68	0.3	0.59	0.36	0.32	0.49
414	Adam23	uc007bgh	5.6e-12	0.47	1.87	0.35	1	0.51	0.77	0.32	0.7	0.4	0.36	0.61
415	Adam23	uc011wmf	4.8e-12	0.46	1.84	0.34	0.98	0.5	0.75	0.31	0.68	0.39	0.36	0.33
416	Fastkd2	uc007bgk	4e-14	13.86	11.97	11.29	6.67	20.06	14.52	15.76	21.18	15.95	17.22	5.91
417	Fastkd2	uc007bgl	2.7e-15	15.09	14.49	11.59	6.97	21.2	14.33	15.59	22.65	15.82	17.74	6.24
418	4933402D24Rik	uc029qow	2e-08	0	0.08	0	0	0	0	0	0	0	0	6.24
419	Klf7	uc007bgo	2.2e-12	4.13	3.54	2.92	2.69	1.44	2.13	2.3	1.01	3.25	1.89	2.96
420	Klf7	uc007bgp	3.6e-12	4	3.56	2.92	2.82	1.49	2.07	2.36	0.99	3.23	1.96	2.2
421	Klf7	uc007bgq	2.1e-12	2.71	2.52	2.1	1.87	0.98	1.4	1.62	0.57	2.17	1.38	1.94
422	Mettl21a	uc007bgu	1.1e-16	6.83	8.94	4.74	9.5	6	5.62	5.22	5.82	5.95	4.74	3.65
423	Mettl21a	uc007bgv	2.3e-16	8.87	11.67	6.26	12.56	7.93	7.34	6.89	7.69	7.77	6.21	8.39
424	Ccnyl1	uc007bgx	1e-15	4.31	4.36	4.4	5.73	5.53	3.67	5.37	5.8	4.38	4.97	4.58
425	Fzd5	uc007bgz	4.2e-31	0.88	4.9	0.45	0.91	0.41	0.48	0.53	0.37	0.86	0.51	0.98
426	Fzd5	uc007bgy	4.2e-31	0.87	4.82	0.45	0.89	0.4	0.47	0.52	0.36	0.85	0.5	1.05
427	Plekhm3	uc007bha	3.9e-21	3.31	4.95	1.67	2.62	1.63	2.03	1.91	1.68	3.34	1.7	1.81
428	Idh1	uc007bhn	5.8e-18	35.08	33.84	13.87	31.09	21.44	23.76	19.38	23.05	18.03	19.63	22.01
429	Pikfyve	uc007bho	3.7e-09	1.31	1.02	0.63	1.97	1.31	1.46	1.03	1.35	1.44	1.5	2.25
430	Pikfyve	uc007bhp	9.6e-09	1.21	0.94	0.62	1.77	1.08	1.26	0.87	1.16	1.28	1.26	1.26
431	Map2	uc007bhw	7e-13	0.69	1.88	0.6	0.8	0.97	1.07	0.9	0.99	0.81	0.72	1.89
432	Map2	uc007bhx	8.4e-13	0.69	1.9	0.61	0.8	0.97	1.08	0.9	1	0.82	0.72	3.81
433	Map2	uc007bhz	1.1e-12	0.43	1.13	0.36	0.49	0.59	0.66	0.54	0.6	0.5	0.44	1.17
434	Map2	uc007bia	7.7e-13	0.73	1.99	0.63	0.84	1.02	1.14	0.94	1.06	0.86	0.76	3.16
435	Map2	uc007bib	7.7e-13	0.73	1.98	0.63	0.84	1.02	1.14	0.94	1.06	0.86	0.76	4.06
436	Map2	uc007bid	4.4e-13	0.77	2.08	0.66	0.87	1.05	1.18	0.99	1.11	0.89	0.78	2.2
437	Rpe	uc007bik	6.8e-08	5.36	6.15	4.31	4.44	7.33	6.9	5.49	9.6	4.41	5.47	7.43
438	Idh1	uc011wmj	5.6e-18	34.77	33.52	13.78	30.8	21.24	23.54	19.2	22.85	17.86	19.47	25.79
439	Kansl1l	uc011wml	4.9e-13	9.51	9.2	10.67	14.91	19.25	12.75	13.48	23.59	11.22	14.57	25.5
440	Kansl1l	uc007bim	4.6e-13	9.27	9.01	10.44	14.6	18.8	12.5	13.13	23.06	10.98	14.21	7.49
441	Kansl1l	uc007bin	4.8e-13	9.32	9.02	10.46	14.62	18.88	12.49	13.21	23.13	10.99	14.29	7.41
442	Kansl1l	uc007bio	2.6e-15	6.72	5.63	7.54	10.86	13.81	9.44	10.49	15.69	8.63	11.14	6.27
443	Kansl1l	uc007bip	1.6e-07	2.52	2.37	2.62	3.73	4.33	3.41	3.34	5.16	2.94	3.3	3.7
444	Acadl	uc007bir	2.5e-33	630.11	342.74	172.2	92.14	198.93	181.56	250.95	186.85	501.07	261.72	159.95
445	Myl1	uc007bis	7.4e-38	2048.23	4279.75	5985.48	4364.51	9901.72	6955.46	7436.39	10155.5	2036.39	8059.93	1028.84
446	Myl1	uc007bit	1.1e-37	1799.37	3624.91	5058.09	3692.87	8393.59	5849.31	6345.85	8496.19	1776.01	6896.97	1622.85
447	Myl1	uc007biu	1.3e-24	892.26	1817.27	2919.36	1831.66	2642.15	3007.22	3060.26	2195.59	865.38	2730.67	1145.99
448	Lancl1	uc011wmm	1e-25	8.01	11.98	10.33	12.45	10.92	19.38	11.19	10.74	6.72	10.2	400.51
449	Lancl1	uc007biv	2.9e-25	8.45	12.63	11.09	13.44	11.82	20.52	12.09	11.18	7.33	11.21	13.94
450	Lancl1	uc007biw	2.6e-25	8.03	12.01	10.56	12.78	11.25	19.52	11.51	10.63	6.97	10.66	13.87
451	Rpe	uc007bil	6.8e-08	5.35	6.14	4.31	4.43	7.33	6.9	5.48	9.59	4.4	5.46	10.84
452	Cps1	uc007biy	7e-08	0.18	0	0	0	0	0.04	0	0.01	0	0.03	4.08
453	Lancl1	uc007bix	2.9e-25	8.38	12.53	11	13.33	11.73	20.36	12	11.09	7.27	11.12	7.05
454	Erbb4	uc007bjb	1.1e-08	0.08	0.49	0.03	0.05	0.03	0.08	0.01	0.02	0.02	0.01	7.13
455	Ikzf2	uc007bjd	5.3e-13	1.23	1.3	1.84	1.13	2.32	4.09	1.65	2.91	1.04	1.87	1.07
456	Abca12	uc011wmq	9.1e-20	0	0.01	0	0.02	0	0	0	0	0	0	1.15
457	Abca12	uc007bjo	7.5e-14	0.01	0.01	0	0	0	0	0	0	0	0	1.09
458	Abca12	uc007bjq	3.6e-11	0	0	0	0.01	0	0	0	0	0	0	3.61
459	Fn1	uc007bjw	1.1e-10	27.81	16.99	12.42	57.55	22.45	12.9	20.03	11.13	20.68	7	17.67
460	Fn1	uc007bjv	1.1e-10	28	17.09	12.5	57.87	22.56	12.97	20.15	11.2	20.83	7.05	35.36
461	Fn1	uc007bjz	1.1e-10	28.64	17.51	12.83	59.43	23.18	13.3	20.67	11.5	21.35	7.23	35.93
462	Fn1	uc007bjy	1.1e-10	28.85	17.62	12.92	59.79	23.31	13.38	20.8	11.58	21.51	7.29	36.51
463	Fn1	uc007bjx	1.2e-10	27.68	16.88	12.27	56.67	22.29	12.68	19.78	11.15	20.57	7.04	35.8
464	Fn1	uc007bka	1.2e-10	28.55	17.42	12.7	58.62	23.06	13.1	20.44	11.54	21.27	7.28	35.58
465	Fn1	uc007bju	1.1e-10	26.93	16.45	12.04	55.75	21.8	12.5	19.42	10.8	20.04	6.78	35.16
466	Fn1	uc007bkb	4e-11	17.02	7.36	6.42	32.78	9.23	7.14	10.97	3.66	10.77	2.94	24.21
467	Fn1	uc007bkc	1.8e-09	9.87	3.16	2.91	20.07	3.78	3.56	5.98	1.35	6.08	1.39	9.74
468	Fn1	uc007bkd	2.3e-09	5.39	1.74	1.6	11.47	2.28	1.96	3.37	0.8	3.47	0.78	1.41
469	Mreg	uc007bkg	1.4e-21	24.86	15.91	17.9	30.95	24.77	27.96	28.25	20.36	51.7	25.22	9.07
470	Pecr	uc007bki	5.8e-08	10.81	14.29	13.66	10.37	13.15	10.88	11.58	12.94	11.61	14.44	15.23
471	Pecr	uc011wmu	3.5e-08	9.92	13.09	12.43	9.27	11.62	9.96	10.31	11.71	10.34	12.86	11.84
472	Xrcc5	uc007bkl	8.4e-30	10.44	29.83	18.08	9.12	34.46	19.16	17.85	41.88	9.19	24.09	11.17
473	Smarcal1	uc007bkq	4.2e-07	5.88	7.15	6.98	7.63	4.54	5.79	6.18	3.58	6.09	5.59	5.62
474	Smarcal1	uc007bkr	3.1e-08	6.58	8.56	7.55	8.05	4.75	6.06	6.31	3.77	6.41	5.63	6.03
475	2018-03-04	uc007bkn	8.7e-16	0.07	0.02	0.47	0.06	0.35	0.18	0.33	0.35	0.07	0.4	3.33
476	Smarcal1	uc007bks	1.9e-16	4.17	6.47	4.55	5.55	4.19	3.99	4.14	3.97	4.42	4.09	2.25
477	Rpl37a	uc007bkv	1.8e-12	10.91	13.3	10.04	9.07	6.07	6.86	6.31	5.62	7.29	5.3	13.67
478	Igfbp2	uc007bkw	1.1e-26	2.11	2.06	0.02	0.23	0	0.21	0.03	0.01	0.26	0	207.41
479	Igfbp5	uc007bkx	1.5e-29	212.95	518.97	223.75	117.44	199.81	90.08	132.89	241.11	66.37	177.58	160.2
480	Tns1	uc007blf	1.2e-17	83.2	78.18	60.54	64.43	42.57	30.07	42.55	31.24	80.31	51.95	32.13
481	Tns1	uc007blg	6.6e-16	65.22	58.08	49.46	48.79	33.81	23.67	35.01	24.04	65.39	41.19	49.01
482	Tns1	uc011wmx	6.3e-16	64.86	57.78	49.2	48.56	33.63	23.55	34.82	23.92	65.03	40.97	49.01
483	Tns1	uc007bli	3.6e-12	15.96	9.65	13.34	4.72	8.77	5.12	11.03	5.15	20.43	10.99	4.04
484	Arpc2	uc007bln	5.1e-12	72.47	74.82	44.56	84.57	63.82	62.83	54.57	66.93	68.5	54.98	48.66
485	Arpc2	uc007blo	5.1e-12	64.55	66.64	39.68	75.3	56.83	55.96	48.59	59.61	61	48.95	91.82
486	Arpc2	uc007blp	5.5e-12	73.34	75.71	45.12	85.65	64.63	63.64	55.26	67.78	69.34	55.67	92.39
487	Aamp	uc011wmz	2.4e-08	30.41	36.08	38.25	30.43	16.21	25.13	23.48	10.48	23.75	22.64	24.34
488	Pnkd	uc007bls	6.8e-15	12.66	14.47	7.95	6.83	3.09	4.9	5.91	1.66	8.72	4.33	4.81
489	Pnkd	uc007blt	1.4e-14	7.8	9.85	7.26	2.21	2.9	3.81	4.28	2.02	5.81	4.78	7.56
490	Aamp	uc007blr	2.4e-08	30.46	36.14	38.31	30.48	16.23	25.18	23.52	10.5	23.78	22.67	27.14
491	Pnkd	uc007blu	1.8e-14	9.45	11.82	8.26	3.15	3.28	4.4	5.04	2.2	6.98	5.26	27.75
492	Pnkd	uc007blw	4.5e-15	7.47	9.59	7.2	1.94	2.86	3.7	4.15	2.01	5.64	4.73	6
493	Catip	uc007blx	3.8e-07	0.22	0.28	0.11	0.33	0.11	1.02	0.18	0.09	0.21	0.11	2.72
494	Catip	uc011wna	5.8e-07	0.22	0.29	0.11	0.34	0.11	1.02	0.18	0.09	0.21	0.12	0.19
495	Slc11a1	uc007bly	2.2e-20	1.47	1.31	0.59	1.17	0.79	7.89	0.72	0.71	0.84	0.43	0.82
496	Ctdsp1	uc007blz	4e-10	24.56	21.46	21	14.1	14.13	17.86	17.58	12.38	19.64	17.91	12.03
497	Tmbim1	uc007blv	7.8e-32	39.55	46.78	27.67	66.38	23.54	39.14	26.96	22.31	42.17	22.06	31.63
498	Plcd4	uc007bmg	2.1e-43	11.37	17.63	66.77	8.07	96.71	36.81	58.77	93.14	5.23	65.83	11.21
499	Plcd4	uc007bmh	2.1e-43	10.38	16.15	60.97	7.39	88.68	33.65	53.72	85.44	4.77	60.32	9.26
500	Plcd4	uc007bmi	1.1e-40	9.47	13.16	58.32	6.42	63.11	29.04	46.79	54.7	3.88	47.09	8.28
501	Plcd4	uc007bmj	1e-42	11.88	19.1	69.28	8.39	108.56	39.12	62.47	106.32	5.6	72.58	8.96
502	Plcd4	uc007bmk	1e-42	11.8	18.97	68.83	8.33	107.85	38.86	62.06	105.61	5.56	72.13	10.17
503	Usp37	uc007bme	2.7e-11	1.78	1.6	1.91	2.67	3.26	3.08	2.88	2.96	2.28	2.18	5.83
504	Zfp142	uc007bml	1.1e-18	4.6	3.23	2.14	2.4	1.27	2.51	1.93	1.13	4.24	1.76	2.36
505	Zfp142	uc007bmm	1.5e-18	4.28	3	2	2.23	1.18	2.33	1.79	1.04	3.94	1.63	3.07
506	Zfp142	uc007bmn	1.9e-18	4.21	2.93	1.97	2.18	1.16	2.3	1.75	1.01	3.87	1.59	2.93
507	Zfp142	uc007bmo	1.7e-09	0.88	0.72	0.4	0.63	0.38	0.65	0.44	0.35	0.76	0.35	1.75
508	Plcd4	uc011wnb	8.4e-43	12.63	20.27	73.69	8.9	115.33	41.58	66.45	113.07	5.93	77.22	5.71
509	Bcs1l	uc007bmq	7.2e-27	24.81	19.28	13.34	5.52	11.64	15.79	13.64	10.94	17.55	14.61	13.18
510	Zfp142	uc007bmp	2.2e-09	0.93	0.76	0.42	0.66	0.4	0.69	0.46	0.37	0.8	0.37	8.07
511	Rnf25	uc007bms	2e-10	10.68	12.68	10.49	11.64	7.19	9.43	9.62	6.43	9.46	8.99	7.83
512	Bcs1l	uc007bmr	6.5e-27	26.28	20.41	14.15	5.84	12.36	16.75	14.48	11.61	18.6	15.5	15.72
513	Ttll4	uc007bmy	6.2e-12	3.14	3.17	4.6	3.41	4.45	4.18	4.4	4.53	3.04	4.21	1.69
514	Ttll4	uc007bmz	1.5e-08	2.83	3.33	4.28	3.38	4.06	3.46	3.89	4.13	2.76	3.55	3.21
515	Rnf25	uc007bmt	2e-10	10.7	12.7	10.52	11.66	7.2	9.44	9.64	6.45	9.48	9.01	9.21
516	Prkag3	uc007bnb	2.8e-41	7.82	7.8	77.9	29.73	78.21	12.98	48.37	68.1	4.91	69.76	11.3
517	Cyp27a1	uc007bna	2.1e-17	26.34	28.14	62.91	29.78	42.28	38.5	43.09	35.53	18.28	53.59	19.72
518	Wnt6	uc007bne	5.6e-16	0.12	0.75	0.28	0.39	0.14	0.12	0.11	0.12	0.09	0.18	16.2
519	Prkag3	uc007bnc	8.3e-32	7.79	7.47	81.88	27.87	55.44	12.71	45.98	40.21	4.72	57.62	4.11
520	Wnt10a	uc007bnf	8.7e-10	0.01	0.31	0.07	0.03	0.02	0.08	0.03	0.02	0.06	0.02	5.84
521	Slc23a3	uc007bno	5.9e-10	0.22	0.1	0.09	0.55	0.06	0.07	0.11	0.1	0.08	0.04	4.04
522	Cnppd1	uc007bnp	2e-15	9.48	10.47	8.03	9.87	5.36	6.83	6.53	4.35	6.85	6.1	8.38
523	Cnppd1	uc007bnq	3.2e-16	9.26	10.06	8.27	9.97	5.96	7.19	6.9	5.14	7.08	6.54	14.97
524	Cnppd1	uc007bnr	3.2e-16	9.02	9.8	8.06	9.71	5.81	7.01	6.72	5.01	6.9	6.37	14.35
525	Fam134a	uc007bnt	4.4e-20	8.87	10.84	4.79	5.88	2.62	5.02	3.7	2.08	5.08	3.36	7.19
526	Fam134a	uc007bnu	3.6e-20	9.05	11.01	4.89	6	2.7	5.06	3.81	2.16	5.11	3.42	14.49
527	Fam134a	uc007bnv	4.4e-20	9.75	11.93	5.26	6.46	2.88	5.51	4.07	2.28	5.59	3.69	15.2
528	Zfand2b	uc011wng	1.5e-09	5.82	6.02	5.34	4.1	2.49	4.88	3.7	1.76	3.93	3.54	13.84
529	Zfand2b	uc011wnf	1.5e-09	5.83	6.04	5.35	4.11	2.49	4.9	3.71	1.76	3.94	3.55	11.9
530	Cnppd1	uc007bns	3.2e-16	9.09	9.87	8.12	9.79	5.85	7.06	6.77	5.04	6.95	6.42	13.1
531	Atg9a	uc007bob	4.7e-08	24.76	25.55	53.89	21.67	22.48	27.74	28.01	19.43	22.03	28.68	13.6
532	Atg9a	uc011wnh	4.4e-08	23.33	24.11	50.7	20.43	21.17	26.13	26.38	18.31	20.78	26.98	24.41
533	Atg9a	uc007boa	4.6e-08	25.1	25.88	54.55	21.96	22.78	28.1	28.36	19.7	22.28	29.06	24.57
534	Atg9a	uc007bnz	3.7e-08	22.35	23.26	47.79	19.71	20.71	24.97	25.3	18.03	19.91	26.18	23.97
535	Atg9a	uc007boc	1.9e-14	37.24	29.52	73.59	46.72	55.3	55.67	62.91	56.24	44.08	58.7	25.96
536	Zfand2b	uc007bnw	1.5e-09	5.66	5.86	5.19	3.99	2.42	4.75	3.6	1.71	3.82	3.45	20.48
537	Ankzf1	uc029qpe	1.8e-21	6	6.45	4.19	4	2.66	4.2	3.76	2.66	3.95	3.62	6.75
538	Ankzf1	uc029qpf	1.1e-21	5.99	6.44	4.17	3.98	2.65	4.16	3.75	2.68	3.95	3.6	7.93
539	Ankzf1	uc029qpg	4.9e-22	5.62	6.16	3.84	3.74	2.63	3.98	3.59	2.7	3.74	3.47	7.59
540	Glb1l	uc011wnk	3.6e-15	1.84	1.75	0.64	1.65	0.83	0.95	0.81	0.7	0.96	0.69	8.36
541	Glb1l	uc011wnl	1.8e-11	2.45	2.3	0.83	2.44	1.18	1.2	1.1	1.08	1.22	0.92	1.93
542	Ankzf1	uc007boe	1.7e-18	6.76	7.34	4.65	4.43	2.73	4.43	4.12	2.58	4.27	4.12	5.89
543	Stk16	uc007boj	1.3e-19	8.39	8.03	5.77	3.79	4.06	4.83	4.54	3.4	5.2	4.77	9.75
544	Stk16	uc007boh	1.3e-19	8.3	7.95	5.72	3.76	4.02	4.78	4.49	3.37	5.15	4.73	9.91
545	Glb1l	uc007bog	6e-12	2.03	1.83	0.64	1.9	0.92	1.04	0.9	0.74	1.02	0.72	5.73
546	Stk16	uc007boi	1.2e-19	8.27	7.93	5.69	3.73	3.99	4.77	4.47	3.36	5.15	4.7	4.92
547	Dnajb2	uc007bon	9.9e-10	27.12	31.07	24.43	19.36	18.85	21.94	22.55	18.46	23.72	20.29	19.57
548	Dnajb2	uc007bom	1.4e-11	40.31	44.45	33.52	25.35	27.66	31.85	32.43	27.84	34.37	29.19	35.62
549	Dnajb2	uc007bop	7.4e-12	40.1	44.2	33.45	25	27.22	31.64	32.13	27.53	34.08	28.78	41.8
550	Dnajb2	uc007boo	1.4e-11	39.21	43.25	32.61	24.66	26.91	30.98	31.56	27.09	33.44	28.4	41.23
551	Dnajb2	uc011wnm	1.4e-11	39.58	43.65	32.92	24.9	27.15	31.27	31.84	27.34	33.74	28.66	20.61
552	Dnpep	uc007bow	2.3e-10	12.86	12.15	10.94	8.14	5.46	8.09	7.85	3.57	10.65	7.39	7.7
553	Dnpep	uc007bou	4.5e-10	20.68	19.33	17.71	12.77	8.7	13.02	12.68	5.67	17.31	11.88	19.78
554	Dnpep	uc007bot	4.9e-10	21.59	20.2	18.47	13.37	9.1	13.61	13.24	5.93	18.1	12.43	24.82
555	Dnpep	uc011wnp	5e-10	19.47	18.23	16.66	12.05	8.22	12.27	11.92	5.35	16.33	11.21	11.44
556	Speg	uc007boz	2e-08	22.51	15.19	29.42	12.56	11.11	15.98	18.15	8.13	23.08	13.94	294.62
557	Speg	uc007bpa	4e-08	7.26	5.51	9.91	4.29	3.15	5	5.62	1.95	7.68	4.1	11.22
558	Speg	uc007bpb	2.8e-09	2.97	2.05	5.67	1.22	0.47	1.78	1.38	0.2	2.81	0.64	4.1
559	Speg	uc007bpc	2.1e-08	24.35	16.44	31.74	13.63	12.09	17.34	19.72	8.86	25.01	15.17	18.05
560	Speg	uc011wnq	9.7e-07	9.49	8.15	12.23	6.87	5.83	7.09	9.07	3.87	11.02	7.24	12.86
561	Gmppa	uc007bpd	1.2e-11	16.65	15.81	18.54	10.22	7.52	12.2	11.43	5.55	11.6	9.85	14.05
562	Gmppa	uc007bpe	1.2e-11	17.08	16.08	18.48	10.35	7.84	12.55	11.86	5.85	11.94	10.27	20.5
563	Gmppa	uc007bpf	1.4e-11	17.12	16.13	18.54	10.35	7.87	12.58	11.89	5.86	11.97	10.31	20.63
564	Chpf	uc007bph	2.2e-13	1.07	1.41	0.65	0.6	0.18	0.47	0.25	0.13	0.47	0.2	7.49
565	Chpf	uc007bpi	3.2e-13	1.06	1.41	0.67	0.59	0.16	0.45	0.24	0.1	0.45	0.19	1.91
566	Chpf	uc007bpj	2.6e-13	1.09	1.47	0.69	0.59	0.14	0.46	0.24	0.09	0.47	0.19	1.95
567	Chpf	uc007bpk	1.5e-13	1.1	1.49	0.71	0.57	0.14	0.45	0.24	0.08	0.46	0.19	1.08
568	Obsl1	uc007bpn	1.7e-14	4.12	12.66	8.47	3.99	1.49	1.6	2.49	0.96	2.3	3.05	3.73
569	Obsl1	uc007bpo	2.5e-14	4.1	11.94	8.21	4.07	1.58	1.69	2.54	0.98	2.34	3.08	5.38
570	Obsl1	uc007bpp	1.8e-14	5.78	16.23	10.69	5.96	2.4	2.48	3.86	1.55	3.51	4.78	6.31
571	Obsl1	uc007bpq	2.4e-14	4.23	11.98	8.13	4.31	1.71	1.78	2.76	1.09	2.54	3.38	6.33
572	Tmem198	uc007bpm	3.8e-07	0.1	0.14	0.03	0.09	0.01	0.05	0.04	0.01	0.06	0.04	2.76
573	Inha	uc007bps	1.5e-21	1.36	11.52	3.05	2.4	0.65	0.45	0.69	0.41	1.02	1.18	1.78
574	Stk11ip	uc007bpt	1e-07	2.7	3.42	3.63	3.59	1.99	2.89	2.51	1.52	2.24	2.47	3.84
575	Stk11ip	uc007bpu	9.2e-08	2.67	3.37	3.57	3.54	1.96	2.84	2.47	1.49	2.21	2.43	4.24
576	Stk11ip	uc011wnr	8.2e-08	2.68	3.38	3.59	3.55	1.97	2.87	2.49	1.5	2.2	2.43	4.22
577	Slc4a3	uc007bpv	4.9e-25	1.33	33.22	1.44	1.99	0.4	0.38	0.66	0.21	2.03	0.48	3.06
578	Slc4a3	uc007bpw	3.3e-25	1.3	31.85	1.42	1.92	0.39	0.36	0.65	0.2	1.99	0.48	1.86
579	Slc4a3	uc007bpx	4e-25	1.43	35.83	1.57	2.16	0.44	0.41	0.7	0.23	2.21	0.53	1.93
580	Obsl1	uc007bpr	4.1e-13	2.5	7.09	5.35	2.38	0.92	0.96	1.49	0.49	1.45	1.82	1.64
581	Epha4	uc007bpz	1e-16	1.5	1.92	0.75	0.6	0.94	0.81	0.83	1	1.47	0.76	2.39
582	Pax3	uc007bqc	1.2e-21	3	0.05	0.27	0.28	0.15	0	0.08	0.66	0.01	0.35	0.16
583	Pax3	uc007bqb	5.8e-21	2.97	0.06	0.29	0.29	0.15	0	0.08	0.69	0.01	0.34	0.31
584	Farsb	uc007bqf	9.4e-14	38.77	39.13	38.03	29.76	53.49	42.58	47	55.83	41.4	45.92	17.86
585	Farsb	uc007bqg	6.7e-14	36.6	36.93	35.81	28.1	50.51	40.04	44.3	52.83	38.88	43.53	34.79
586	Farsb	uc007bqh	7.9e-14	37.37	38.05	36.57	28.8	52.07	41.09	45.48	54.61	39.83	44.49	34.34
587	Farsb	uc007bqi	6.5e-14	37.5	37.83	36.71	28.8	51.76	41.04	45.42	54.16	39.85	44.63	34.76
588	Sgpp2	uc007bqe	1.9e-10	0.04	0.12	0.02	0	0.03	0.03	0.03	0.03	0.04	0.02	18.75
589	Mogat1	uc007bql	2.4e-09	0.71	25.11	0.1	0.06	0.19	0.2	0.12	0.43	0.11	0.18	1.47
590	Utp14b	uc007bqn	5.3e-07	0.61	0.53	0.38	0.69	0.86	0.73	0.57	1	1.04	0.63	0.71
591	Acsl3	uc007bqp	1.3e-21	5.48	6.31	5.45	5.24	18.26	10.39	8.57	33.07	8.61	10.39	4.88
592	Acsl3	uc011wnu	9.1e-22	5.72	6.71	5.59	5.44	18.9	10.58	8.84	33.99	8.91	10.86	8.98
593	Acsl3	uc007bqo	1.4e-21	5.33	6.09	5.29	5.07	17.66	10.05	8.29	31.93	8.34	10.05	8.85
594	Utp14b	uc011wnv	4e-07	0.61	0.53	0.38	0.69	0.86	0.73	0.57	1	1.05	0.63	4.74
595	Kcne4	uc007bqq	9.5e-14	1.74	2.25	0.91	2	1.24	0.99	0.85	0.97	2.21	1.14	0.99
596	Ap1s3	uc011wnw	1.7e-08	0.16	0.37	0.01	0.05	0.06	0.68	0.02	0.1	0.03	0.02	1.44
597	Wdfy1	uc007bqu	1.9e-08	3.88	4.01	2.62	4.59	2.95	4.24	2.69	3.8	3.42	2.88	3.16
598	Mrpl44	uc007bqx	1.5e-12	18.53	14.2	12.42	9.17	9.96	10.99	11.2	9.54	15.46	12.36	6.96
599	Serpine2	uc007bqz	1.7e-20	66.79	70.86	84.01	105.27	82.86	85.37	88.37	99.19	88	91.15	29.37
600	Serpine2	uc007bra	2.5e-17	11.76	10.09	15.25	19.17	14.46	16.46	17.37	15.71	16.28	15.7	34.29
601	Fam124b	uc007brb	3e-15	1.11	1.03	0.52	0.13	0.39	0.76	0.55	0.36	0.57	0.44	5.22
602	Cul3	uc007brc	2.7e-20	94.01	101.65	151.92	135.95	293.6	163.09	196.53	371.23	116.53	221.31	37.31
603	Mrpl44	uc007bqy	1.4e-19	34.51	28.83	23.09	15.34	18.37	19.86	18.94	17.53	27.58	21.98	50.82
604	Cul3	uc007brd	2.7e-20	89.86	97.17	145.21	129.94	280.62	155.88	187.85	354.82	111.39	211.52	49.19
605	Irs1	uc007brp	1.2e-18	13.91	9.8	14.92	17.5	22.73	11.03	16.95	28.26	16.19	18.99	3.71
606	Col4a3	uc007brv	1.4e-12	0.72	1.34	0.57	0.71	0.63	0.75	0.4	0.89	0.44	0.53	0.33
607	Mff	uc007brx	5.7e-11	80.91	91.7	76.67	80.86	109.37	85.87	86.05	122.92	78.24	108.13	38.15
608	Mff	uc007bry	1e-10	82.18	93.99	77.03	83.02	112.27	87.31	87.27	127.7	80.54	110.01	76.76
609	Mff	uc007brz	1e-10	82.03	93.83	76.89	82.88	112.07	87.16	87.12	127.47	80.39	109.81	77.81
610	Mff	uc007bsa	1.1e-10	99.26	106.52	102.24	101.7	148.9	117.81	116.05	151.69	102.96	149.92	83.29
611	Mff	uc011woa	2e-10	122.01	130.41	123.13	129.17	182.82	145.73	142.59	187.95	133.93	181.78	99.06
612	Mff	uc007bsb	2.9e-10	114.8	123.31	114.49	122.38	168.69	129.61	129.85	171.14	120.86	166.97	106.66
613	Mff	uc007bsc	1.9e-10	98.34	112.39	90.42	99.5	135.82	103.23	104.01	155.05	96.17	131.56	46.55
614	Sphkap	uc007bsp	6.1e-25	0.11	5.23	0.11	0.05	0.19	0.22	0.09	0.21	0.04	0.11	0.26
615	Sphkap	uc007bsq	3.5e-25	0.1	4.8	0.11	0.04	0.17	0.21	0.08	0.19	0.04	0.1	0.3
616	Sphkap	uc007bsr	5.6e-15	0.06	2.85	0.07	0.03	0.09	0.15	0.06	0.08	0.02	0.06	0.22
617	Pid1	uc007bst	9.2e-17	5.65	7.66	2.63	8.21	4.7	3.24	3.32	4.71	3.76	2.36	4.12
618	Trip12	uc007bsy	5.2e-14	28.16	24.44	25.33	37.38	44.74	37.68	35.99	49.19	35.51	36.02	12.11
619	Trip12	uc007bsz	3.6e-17	23.42	13.72	23.41	31.75	36.22	35.94	31.83	33.95	33.84	30.42	19.65
620	Trip12	uc007btb	6.3e-15	22.4	12.22	22.53	31.82	30.31	35.41	31.65	26.47	33.03	26.89	7.02
621	Fbxo36	uc007btc	5.8e-12	2.43	2.52	2.91	6.01	2.9	3.56	3.33	2.47	3.91	2.65	9.2
622	Sp100	uc007bud	2.3e-10	7.82	7.23	3.02	1.79	4.51	9.87	3.78	4.3	4.91	4.6	2.48
623	Sp100	uc007bue	3.1e-10	14.38	13.59	5.94	3.62	8.54	17.27	7.35	8.09	9.5	8.74	6.28
624	Sp100	uc011woc	1.8e-10	15.37	14.2	6.5	3.88	8.82	17.52	8.01	8.14	10.37	8.99	8.28
625	Sp100	uc007buf	3.1e-10	13.55	12.81	5.82	3.56	8.08	15.74	7.3	7.41	9.18	8.17	8.13
626	Sp100	uc007bug	2.7e-10	13.95	13.15	5.98	3.66	8.23	16.03	7.47	7.61	9.48	8.37	7.87
627	Sp100	uc007buh	7.1e-11	16.09	14.89	6.77	3.86	8.65	17.84	8.04	8.1	10.5	8.76	4.88
628	Cab39	uc007bum	1.4e-10	93.83	65.61	71.26	109.46	104.01	78.52	106.39	118.88	115.68	84.31	37.47
629	Itm2c	uc011wof	6.7e-11	15.15	21.05	12.51	19.03	10.43	10.47	12.27	7.12	8.37	9.36	51.4
630	Htr2b	uc011woh	1.2e-09	1.18	0.33	0.04	0.35	0.19	0.12	0.11	0.02	0.14	0.11	0.25
631	Psmd1	uc007buy	2.5e-18	68.35	70.58	84.38	114.9	106.23	90.54	98.57	112.57	85.15	96.03	30.93
632	Armc9	uc007bvc	4.8e-08	0.76	1.14	0.82	1.25	0.53	0.72	0.71	0.48	0.72	0.53	0.71
633	Armc9	uc007bve	2.7e-08	0.77	1.18	0.86	1.31	0.58	0.73	0.74	0.53	0.73	0.57	0.75
634	Armc9	uc007bvj	2.7e-08	0.8	1.21	0.88	1.34	0.59	0.75	0.76	0.54	0.75	0.59	0.97
635	Htr2b	uc007buz	1.2e-09	1.16	0.32	0.04	0.35	0.18	0.12	0.11	0.02	0.13	0.1	0.73
636	Ncl	uc007bvl	2e-13	26.54	28.01	21.7	56.51	45.51	34.43	36.5	44.83	37.16	34.28	17.44
637	Pde6d	uc007bvq	4.7e-15	22.61	32.44	17.87	24.95	20.98	25.42	23.74	20.37	16.33	21.85	12.33
638	Ptma	uc007bvp	3.3e-08	6.42	7.42	2.75	7.77	3.18	5.61	2.54	3.23	4.41	1.91	26.19
639	Cops7b	uc007bvr	1.1e-14	8.24	7.3	5.89	6.74	4.59	6.14	5.64	4.25	8.1	5.97	18.65
640	Pde6d	uc011wok	5.1e-15	20.84	29.91	16.48	23.01	19.35	23.45	21.88	18.78	15.05	20.16	16.16
641	Cops7b	uc007bvs	1.7e-14	8.35	7.45	6	6.88	4.68	6.29	5.77	4.34	8.23	6.08	16.27
642	Nppc	uc007bvt	9.2e-07	0.1	1.81	0.19	0.07	0.21	0.24	0.32	0.28	0.35	0.18	3.15
643	Chrnd	uc007bwf	7.3e-33	3.75	14.83	3.09	7.49	0.89	1.88	1.4	0.68	3.34	1.12	2.67
644	Chrnd	uc007bwg	7.4e-33	3.78	14.9	3.11	7.53	0.89	1.89	1.4	0.69	3.36	1.13	5.36
645	Eif4e2	uc007bwj	5.3e-08	18.34	16.32	18.1	16.9	14.84	20.08	16.85	11.86	20.35	15.72	10.5
646	Eif4e2	uc007bwk	5.4e-10	14.22	12.52	13.45	12.8	11.01	14.53	12.62	8.78	14.95	11.73	19.43
647	Eif4e2	uc007bwl	5.8e-10	19.52	19.01	20.76	17.17	20.73	22.55	20.82	20.75	22.14	23.28	18.1
648	Eif4e2	uc007bwm	4.5e-08	13.14	11.69	13	12.08	10.62	14.36	12.05	8.47	14.6	11.23	16.69
649	Eif4e2	uc007bwn	4.7e-10	11.41	10.04	10.82	10.26	8.82	11.65	10.12	7.03	12.02	9.4	14.73
650	Efhd1	uc007bwo	6.2e-17	1.66	9.22	3.78	6.17	4.61	2.13	2.99	4.75	4.17	2.53	8.71
651	Gigyf2	uc011won	1.2e-10	9.93	8.1	9.62	10.81	8.64	10.92	11.28	7.6	12.65	9.32	4.91
652	Gigyf2	uc007bws	8e-11	9.01	7.43	8.91	9.75	7.42	9.81	9.95	6.49	11.19	8.14	7.54
653	Gigyf2	uc007bwv	1.8e-09	3.82	2.95	3.81	4.08	2.84	4.16	4.09	2.26	4.7	3.24	6.8
654	Ngef	uc007bwx	1.8e-12	0.2	0.95	0.08	1.65	0.03	0.14	0.1	0.07	0.05	0.04	1.76
655	Neu2	uc011wop	1.9e-14	6.44	6.32	8.89	3.93	5.94	10.94	7.01	6.38	5.87	8.04	2.34
656	Neu2	uc011woq	1.9e-14	6.84	6.72	9.45	4.18	6.32	11.64	7.45	6.78	6.24	8.55	4.73
657	Neu2	uc007bwz	1.4e-14	6.41	6.49	8.88	3.9	5.89	10.99	6.92	6.37	5.79	7.97	4.71
658	Neu2	uc007bxa	1.9e-14	6.98	6.86	9.64	4.27	6.45	11.87	7.61	6.92	6.37	8.72	4.76
659	Neu2	uc007bxb	2.9e-14	6.21	6	8.72	4.08	5.93	10.67	6.97	6.62	5.72	8	4.68
660	Inpp5d	uc007bxc	9.8e-08	2.14	1.34	0.78	1.8	0.62	3.21	0.7	0.46	1.04	0.63	3.02
661	Inpp5d	uc007bxd	8.5e-08	2.15	1.36	0.79	1.83	0.62	3.23	0.7	0.46	1.04	0.63	1.66
662	Inpp5d	uc007bxe	8.3e-08	2.15	1.36	0.79	1.83	0.62	3.23	0.7	0.46	1.04	0.63	1.66
663	Inpp5d	uc007bxf	9.8e-08	2.14	1.34	0.78	1.8	0.62	3.21	0.7	0.46	1.04	0.63	1.66
664	Inpp5d	uc007bxg	1.6e-07	2.42	1.55	0.88	2.07	0.73	3.66	0.79	0.53	1.19	0.72	1.78
665	Inpp5d	uc007bxh	1.9e-07	2.39	1.52	0.87	2.03	0.72	3.61	0.78	0.52	1.18	0.72	1.9
666	Atg16l1	uc007bxm	4.7e-09	11.13	10.61	9.75	9.35	7.66	9.28	8.61	6.8	10.19	9.38	6.78
667	Atg16l1	uc007bxn	3.7e-09	11.33	10.89	9.96	9.54	7.83	9.47	8.82	6.95	10.37	9.6	12.11
668	Atg16l1	uc007bxl	3.8e-09	11.29	10.77	9.89	9.47	7.76	9.4	8.74	6.88	10.32	9.5	12.2
669	Atg16l1	uc029qrh	1.6e-07	9.62	8.74	9.62	9.38	7.57	8.71	8.15	6.74	10.18	8.7	11.01
670	Atg16l1	uc007bxo	1.8e-08	2.58	2.58	2.24	2.5	2.04	2.17	2.1	1.86	2.59	2.19	6.23
671	Dgkd	uc011wos	2.9e-12	13.82	9.94	10.09	18.04	8.91	12.04	11.41	8.29	13.86	10.88	6.49
672	Dgkd	uc007bxu	2.2e-09	16.16	12.43	11.05	18.74	9.93	13.1	11.65	9.29	14.6	12.44	13.91
673	Ngef	uc007bwy	9e-13	0.17	0.84	0.07	1.46	0.03	0.13	0.08	0.06	0.04	0.04	9.1
674	Usp40	uc007bxw	2.1e-07	7.44	8	5.57	6.74	7.16	6.88	7.62	6.72	9.1	7.45	6.03
675	Usp40	uc007bxy	2.8e-07	7.35	7.88	5.49	6.66	7.07	6.77	7.53	6.62	8.98	7.34	8.99
676	Usp40	uc007bxx	2.8e-07	7.17	7.7	5.37	6.5	6.9	6.61	7.35	6.46	8.76	7.16	8.8
677	Usp40	uc011wot	3e-08	7.03	7.19	5.36	6.51	5.75	6.04	7.08	5.47	8.16	6.18	8.42
678	Dgkd	uc007bxv	3.5e-09	17.69	13.8	12.03	20.36	11.18	14.21	12.77	10.62	15.95	13.8	10.52
679	Ugt1a10	uc007bya	2.9e-18	5.38	14.34	0.2	1.43	0.57	0.46	0.39	0.58	0.28	0.18	15.07
680	Ugt1a9	uc007byb	2.9e-18	5.42	14.46	0.2	1.44	0.58	0.47	0.39	0.58	0.28	0.19	13.46
681	Ugt1a7c	uc007byc	1.9e-17	6.43	14.24	0.23	1.81	0.71	0.6	0.49	0.71	0.34	0.26	13.8
682	Ugt1a2	uc007byd	2.1e-18	5.39	14.14	0.19	1.42	0.6	0.47	0.4	0.59	0.28	0.18	16.16
683	Ugt1a6a	uc029qri	1.4e-18	5.72	14.19	0.21	1.49	0.6	0.48	0.4	0.58	0.3	0.18	13.45
684	Ugt1a6a	uc007bye	1.4e-17	2.73	5.37	0.1	0.77	0.2	0.19	0.18	0.21	0.12	0.06	8.82
685	Ugt1a6a	uc007byf	5.5e-19	6.13	14.25	0.21	1.57	0.61	0.49	0.41	0.59	0.31	0.19	8.97
686	Ugt1a6a	uc007byg	5.5e-19	6.19	14.39	0.21	1.59	0.62	0.49	0.42	0.6	0.31	0.19	13.94
687	Ugt1a5	uc007byh	2.9e-18	5.45	14.49	0.2	1.45	0.58	0.47	0.4	0.58	0.28	0.19	13.78
688	Ugt1a2	uc007byi	2.9e-18	5.44	14.5	0.2	1.44	0.58	0.47	0.4	0.58	0.28	0.19	7.13
689	Ugt1a1	uc007byk	2.7e-18	5.42	14.46	0.2	1.45	0.58	0.47	0.39	0.58	0.28	0.19	13.56
690	Hjurp	uc011wow	2.8e-18	8.97	13.15	3.6	4.87	3.42	4.77	3.48	3.16	4.12	3.33	4.81
691	Hjurp	uc007bym	3.8e-18	8.89	12.93	3.57	4.81	3.38	4.68	3.44	3.11	4.06	3.28	9.39
692	Hjurp	uc007byn	3.5e-18	8.76	12.79	3.51	4.78	3.35	4.65	3.42	3.07	4.02	3.25	9.27
693	Hjurp	uc029qrj	1.5e-18	3.29	3.46	1.02	1.27	0.95	1.28	1.08	1.02	1.1	0.88	1.02
694	Arl4c	uc007byt	5.1e-11	1.26	0.8	0.36	3.6	0.9	2.98	0.68	0.69	0.98	0.51	2.05
695	Sh3bp4	uc007byv	9.2e-20	3	2.98	1.14	2.37	0.53	1.17	0.79	0.36	1.59	0.68	4.45
696	Agap1	uc007byx	1.6e-32	6.06	6.08	2.93	3.65	2.26	3.48	2.81	2	3.29	2.15	5.23
697	Agap1	uc007byw	2.3e-32	5.99	6.01	2.9	3.6	2.23	3.45	2.78	1.97	3.25	2.12	5.63
698	Agap1	uc007byy	1e-32	6.68	6.72	3.22	4.02	2.5	3.85	3.1	2.22	3.62	2.38	3.12
699	Asb18	uc007bzd	3.8e-20	6.06	1.68	5.09	0.6	2.54	3.56	3.61	2.07	4.61	3.76	1.87
700	Asb18	uc007bze	4e-20	11	3.06	9.23	1.09	4.61	6.47	6.56	3.76	8.28	6.82	5.15
701	Asb18	uc011wpb	3.9e-20	6.64	1.85	5.57	0.66	2.79	3.91	3.96	2.27	5	4.11	5.32
702	Iqca	uc007bzf	1.2e-10	0.04	0	0	0	0	0	0	0	0	0	2
703	Ackr3	uc007bzh	6.4e-24	26.25	20.53	12.4	25.68	8.89	11.2	12.26	9	13.86	7.85	30.04
704	Iqca	uc007bzg	1.5e-10	0.03	0	0	0	0	0	0	0	0	0	18.64
705	Cops8	uc007bzi	1.6e-11	56.71	53.39	61.41	45.54	57.78	56.93	57.21	55.5	53.48	63.78	25.48
706	Mlph	uc007bzm	1.5e-13	0.24	0.94	0.11	0.67	0.09	0.42	0.09	0.09	0.16	0.13	26.35
707	Rab17	uc007bzn	1.4e-10	0.32	0.77	0.03	0.02	0.02	0.13	0.02	0	0.07	0.01	2.3
708	Lrrfip1	uc007bzp	4e-13	27.95	20.61	41.89	36.73	30.71	30.38	35.83	24.04	43.07	27.29	8.07
709	Lrrfip1	uc007bzq	1.8e-24	49.21	38.59	60.18	63.98	77.21	55.75	62.64	69.61	73.5	58.67	21.12
710	Lrrfip1	uc007bzr	2.7e-20	13.48	10.25	15.91	22.79	18.92	15.79	17.34	16.25	22.28	14.32	19.58
711	Lrrfip1	uc007bzs	2.1e-24	41.81	32.28	53.45	54.14	63.54	47.49	53.49	56.68	62.42	49.09	17.75
712	Lrrfip1	uc007bzt	2e-24	40.48	31.3	51.79	52.62	61.53	45.97	51.83	54.88	60.49	47.59	22.21
713	Lrrfip1	uc011wpe	1.4e-24	46.27	36.16	57.02	60.59	73.15	52.71	59.37	65.73	69.31	55.24	23.3
714	Lrrfip1	uc007bzu	2.6e-15	9.04	6.88	8.75	17.63	14.68	11.33	11.54	13.31	15.93	9.98	18.06
715	Ramp1	uc011wpf	4.3e-16	5.69	12.45	6.54	6.2	2.43	7.97	5.08	1.79	5.74	5.46	3.29
716	Ramp1	uc007bzw	4.8e-16	6.2	13.58	7.14	6.78	2.66	8.7	5.53	1.95	6.27	5.97	6.88
717	Ramp1	uc007bzx	1.3e-18	17.56	47.92	23.43	23.82	10.36	28.58	18.76	8.48	21	20.28	14.24
718	Ube2f	uc007bzy	2.9e-12	25.23	23.46	24.59	19.53	29.2	30.88	25.45	31.15	30.33	29.66	22.27
719	Ube2f	uc007bzz	2.8e-12	24.03	22.35	23.42	18.61	27.82	29.42	24.25	29.67	28.89	28.25	22.68
720	Ube2f	uc007caa	2.9e-12	24.42	22.71	23.8	18.91	28.27	29.89	24.64	30.16	29.36	28.71	22.32
721	Ube2f	uc007cab	2.9e-12	25.28	23.51	24.64	19.58	29.27	30.95	25.51	31.22	30.39	29.72	22.89
722	Ube2f	uc007cac	2.7e-12	20.9	19.44	20.37	16.18	24.2	25.59	21.1	25.81	25.13	24.58	21.27
723	Scly	uc007cad	9e-07	6.23	5.26	5.11	3.2	3.04	4.61	4.68	2.84	4.21	4.02	12.22
724	Scly	uc007cae	2.4e-11	2.83	2.82	2.2	1.2	1.1	1.79	1.77	0.99	1.75	1.58	3.74
725	Scly	uc007caf	1.7e-09	5.34	5.33	4.61	2.43	2.52	3.56	3.21	2.13	3.28	3.33	3.83
726	Espnl	uc007cah	5.4e-07	0.02	0.13	0.02	0.17	0.01	0.01	0.02	0.01	0.06	0.02	2.68
727	Klhl30	uc007cai	2.3e-07	25.83	22.45	43.26	25.16	20.53	20.61	29.14	22.3	22.49	32.31	8
728	Rab17	uc007bzo	6.3e-11	0.28	0.67	0.02	0.01	0.01	0.12	0.01	0	0.05	0.01	14.01
729	Ilkap	uc007cak	2.3e-17	18.17	16.15	11.39	14.27	12.3	12.09	12.12	11.22	15.88	12.89	8.64
730	Ilkap	uc007cal	4.2e-17	39.62	35.98	25.43	29.56	24.77	25.88	25.23	22.25	33.15	26.31	26.33
731	Ilkap	uc011wpg	8e-19	24	22.19	15.25	18.41	14.74	15.62	15.03	13.28	20.02	15.64	29.4
732	Ilkap	uc007cam	4.5e-14	36.95	32.73	23.19	30.28	27.42	25.15	25.57	25.6	33.68	28.1	25.92
733	Hes6	uc007cau	3.7e-15	7.79	6.33	3.47	4.63	2.01	3.67	2.67	1.34	4.53	2.31	5.21
734	Hes6	uc007cat	4.2e-15	6.64	5.39	2.97	3.94	1.71	3.13	2.28	1.14	3.86	1.96	9.62
735	Per2	uc007cav	5.8e-07	0.82	1.55	1.03	4.73	1.44	1.94	1.42	1.36	0.64	1.27	5.17
736	Per2	uc011wph	5.8e-07	0.82	1.56	1.03	4.74	1.44	1.94	1.42	1.36	0.64	1.27	1.49
737	Fam132b	uc007caj	3.9e-19	0.6	3.13	0.7	0.56	0.28	0.24	0.59	0.3	1.61	0.41	1.15
738	Traf3ip1	uc007cax	1.3e-14	2.72	2.86	2.16	2.26	1.45	2.21	2.09	1.44	2.56	1.65	1.84
739	Traf3ip1	uc007cay	4.2e-14	2.97	3.26	2.39	2.44	1.66	2.42	2.23	1.67	2.8	1.78	3.16
740	Asb1	uc007caz	3.6e-17	5.89	6.76	4.9	6.22	4.87	4.43	5.25	4.96	7.11	5.78	4.36
741	Asb1	uc007cba	3.6e-17	5.89	6.76	4.89	6.21	4.87	4.42	5.24	4.96	7.1	5.78	5.3
742	Asb1	uc007cbc	3.2e-17	6.09	6.99	5.06	6.43	5.04	4.58	5.43	5.13	7.35	5.98	3.11
743	Hdac4	uc007cbe	6.1e-10	3.81	2.67	6.91	6.96	2.67	3.22	3.67	2.5	3.04	3.56	5.77
744	Hdac4	uc007cbf	9.4e-10	3.63	2.56	6.61	6.67	2.56	3.14	3.57	2.31	2.9	3.42	4.01
745	Hdac4	uc007cbg	9.4e-10	3.56	2.51	6.48	6.54	2.5	3.08	3.5	2.26	2.84	3.35	3.91
746	Ndufa10	uc007cbh	1.3e-25	432.77	355.04	236.54	128.54	201.1	229.17	223.72	168.98	334.49	262.91	132.77
747	Myeov2	uc011wpj	1.1e-10	53.09	65.27	45.6	44.31	46.58	38.16	42.95	43.3	43.75	51.53	34.33
748	Myeov2	uc007cbq	9.5e-11	81.62	100.35	70.08	68.13	71.64	58.65	65.91	66.62	67.29	79.25	87.08
749	Gpc1	uc007cbs	5.5e-07	46.45	61.31	67.2	39.34	28.01	45.13	39.68	19.48	29.99	37.79	29.43
750	Dusp28	uc007cbu	6.3e-13	12.38	14.36	13.17	9.3	11.95	8.74	11.26	11.19	10.31	14.35	4.96
751	Rnpepl1	uc007cbw	8.2e-11	16.87	15.17	14.46	7.76	5.02	9.15	7.79	3.59	10.97	7.24	10.18
752	Capn10	uc007cbx	2.2e-11	1.4	1.66	1.35	1.15	0.67	0.82	0.98	0.55	0.8	0.75	11.17
753	Capn10	uc007cby	1.2e-11	1.84	2.1	1.82	1.19	0.75	1.05	1.06	0.62	0.98	0.97	2.61
754	Gpr35	uc007cbz	1.1e-08	0.23	0.13	0.08	0.18	0.14	0.25	0.09	0.09	0.16	0.09	1.97
755	Gpr35	uc007cca	9.6e-09	0.23	0.13	0.08	0.19	0.14	0.25	0.09	0.09	0.16	0.09	1.12
756	Gpr35	uc007ccb	1e-08	0.22	0.13	0.07	0.18	0.13	0.24	0.08	0.09	0.16	0.09	1.1
757	Kif1a	uc007cde	2.3e-28	0.38	6.65	0.45	0.76	0.21	0.29	0.26	0.09	0.36	0.15	0.49
758	Kif1a	uc007cdf	2.3e-28	0.37	6.57	0.45	0.75	0.21	0.28	0.25	0.09	0.36	0.15	0.49
759	Kif1a	uc007cdg	2.3e-28	0.37	6.59	0.45	0.75	0.21	0.28	0.26	0.09	0.36	0.15	0.49
760	Kif1a	uc007cdh	2.3e-28	0.37	6.57	0.45	0.75	0.21	0.28	0.25	0.09	0.36	0.14	0.24
761	2310007B03Rik	uc007cdj	3.4e-24	0	0.16	0	0	0	0.01	0	0	0	0	4.03
762	Sned1	uc007cdm	3.8e-29	3.18	7.89	1.38	2.14	0.48	3.1	0.66	0.35	1.09	0.5	1.2
763	2310007B03Rik	uc007cdk	3.5e-24	0	0.16	0	0	0	0.01	0	0	0	0	4.93
764	Mterf4	uc007cdo	6.3e-15	4.67	4.87	2.96	3.03	3.7	3.42	3.41	3.55	3.94	3.88	6.25
765	Mterf4	uc007cdp	6.4e-11	3.68	3.56	2.37	2.41	2.95	2.97	2.71	2.66	3.35	3.13	4.33
766	Hdlbp	uc007cdx	6.2e-07	104.85	93.45	108.83	97.3	101.28	109.82	118.18	93.49	116.25	108.79	41.02
767	Hdlbp	uc007cdy	6.2e-07	104.48	93.11	108.43	96.95	100.91	109.42	117.75	93.15	115.83	108.39	81.43
768	Farp2	uc007ceb	1.5e-08	2.2	1.81	1.86	3.39	2.15	2.44	2.23	2.18	2.41	2.09	20.68
769	Hdlbp	uc007cdz	1.8e-10	67.95	47.29	73.02	71.03	68.73	83.51	89.28	60.66	84.8	73.04	24.06
770	Farp2	uc007cec	5.9e-12	4.03	4.02	3.36	5.48	3.24	3.74	3.44	3.11	3.86	3.31	24.88
771	Stk25	uc007ced	1.4e-09	24.18	30.99	27.12	26.21	19.68	22.27	22.7	16.49	21.64	22.56	15.88
772	Thap4	uc007cef	1.4e-13	14.34	19.3	14.38	9.38	11.12	10.22	11.9	9.1	8.35	14.33	23.34
773	Thap4	uc007ceg	1.2e-13	14.87	20.09	14.9	9.76	11.61	10.6	12.37	9.5	8.69	14.95	18.6
774	Bok	uc007cee	8.8e-21	1.79	1.48	0.66	2.26	0.56	0.87	0.68	0.43	1.09	0.56	14.01
775	Thap4	uc007ceh	1.2e-08	5.93	5.95	6.19	4.65	3.11	4.46	4.92	2.19	3.89	4.58	3.48
776	Dtymk	uc007cek	1.8e-13	9.45	11.52	6.52	6.92	6.53	6.46	5.88	6.56	6.65	6.21	9.09
777	Dtymk	uc007cel	2e-09	6.12	8.22	3.79	3.66	3.43	4.74	3.2	3.42	4.55	3.33	8.85
778	Atg4b	uc007cej	5.1e-11	10.43	10.61	9.48	9.91	7.27	8.56	8.58	6.45	8.66	8.78	9.27
779	Ing5	uc007cen	7.5e-16	3.42	3.8	1.84	3.05	1.96	2.68	2.27	1.92	2.97	2.05	8.06
780	Ing5	uc011wpr	7.5e-16	3.41	3.79	1.83	3.03	1.95	2.67	2.26	1.91	2.96	2.05	4.01
781	D2hgdh	uc007cep	1.6e-25	6.85	7.1	6.54	3.16	6.32	5.82	5.19	6.49	4.51	6.37	5.2
782	D2hgdh	uc007ceq	5.7e-12	1.92	4.07	2.16	0.92	1.16	1.63	1.61	0.77	1.2	1.53	4.21
783	D2hgdh	uc007cer	4.7e-12	1.89	4.09	2.16	0.91	1.16	1.63	1.62	0.78	1.2	1.53	2.02
784	D2hgdh	uc007ceo	1.2e-25	6.42	6.65	6.19	2.97	5.9	5.45	4.88	6.05	4.22	5.95	4.02
785	Gal3st2	uc007ces	5.4e-09	0.01	0.44	0	0.01	0.01	0.09	0	0	0	0	4.4
786	Dtymk	uc007cem	1.3e-12	5.5	6.76	4.76	3.73	2.8	3.86	3.53	3.08	3.06	3.49	3.43
787	St8sia4	uc011wpu	9.7e-08	3.17	3.62	1.35	1.12	2.21	3.8	1.98	2.82	2.12	2.04	1.19
788	St8sia4	uc007cfa	1.6e-11	1.67	1.74	0.61	0.56	0.99	1.7	0.89	0.77	1.26	1.1	1.56
789	Slco4c1	uc007cfc	6.8e-11	0	0.61	0	0	0	0.02	0.01	0	0	0	9.32
790	D1Ertd622e	uc007cfg	7.2e-25	1.04	2.5	3.62	1.9	7.55	4.15	3.61	9.28	0.98	4.87	1.49
791	D1Ertd622e	uc007cfh	7.3e-25	1.32	3.19	4.61	2.43	9.64	5.29	4.61	11.85	1.25	6.21	3.39
792	D1Ertd622e	uc011wpw	9.5e-25	1.36	3.27	4.72	2.49	9.91	5.41	4.71	12.22	1.29	6.37	3.86
793	Ppip5k2	uc007cfi	4.4e-12	3.46	3.92	1.73	2.39	2.36	3.57	2.17	2.67	2.6	1.75	4.38
794	Ppip5k2	uc007cfk	2.6e-11	2.45	2.77	1.15	1.72	1.82	2.6	1.53	1.97	1.85	1.25	5.02
795	Gin1	uc007cfm	3e-07	2.17	2.32	1.42	1.65	2.34	3	1.82	2.12	1.76	1.93	1.16
796	Gin1	uc007cfn	5.5e-09	2.9	3.03	2.33	2.84	3.74	5.02	2.78	4.1	2.54	3.15	2.91
797	Ppip5k2	uc007cfl	2.2e-08	1.94	2.08	0.85	1.36	1.51	1.99	1.2	1.52	1.49	1.03	3.14
798	Pam	uc007cfo	6.9e-34	22.31	60.52	11.16	47.85	14.63	16.72	17.61	11.92	27.29	11.84	22.97
799	Pam	uc007cfp	6.9e-34	22.3	60.48	11.15	47.81	14.62	16.7	17.6	11.91	27.27	11.83	43.46
800	Pam	uc007cfq	8.9e-33	28.58	77.77	14.61	65.63	19.76	21.89	24.3	16.01	35.1	16.5	49.22
801	Pam	uc007cfr	9.8e-24	2.16	4.34	1.1	3.86	0.96	1.26	1.3	0.71	2.92	0.99	29.41
802	Gin1	uc011wpx	1.5e-08	3.15	3.25	2.48	3.06	3.98	5.23	3.03	4.34	2.67	3.38	3.96
803	Rnf152	uc011wpy	3.6e-14	0.44	0.82	0.22	0.39	0.4	0.32	0.3	0.37	0.49	0.28	1.04
804	Pign	uc007cgg	3.4e-07	0.7	0.45	0.48	0.73	0.81	0.86	0.7	1	0.8	0.65	2.17
805	2310035C23Rik	uc007cgm	1.6e-08	4.12	4.67	2.49	4.95	4.05	3.95	3.31	4.8	4.25	3.33	4.58
806	2310035C23Rik	uc007cgk	1.6e-08	4.09	4.62	2.46	4.9	4	3.92	3.27	4.74	4.21	3.3	6.98
807	2310035C23Rik	uc007cgl	1.3e-08	4.1	4.67	2.47	4.91	4	3.92	3.27	4.73	4.21	3.3	6.96
808	2310035C23Rik	uc007cgn	1.3e-08	5.14	5.94	3.08	5.99	5.03	4.82	4.05	5.98	5.15	4.15	7.98
809	Tnfrsf11a	uc007cgp	1.3e-10	0.61	0.67	0.18	1.07	0.36	0.51	0.31	0.38	0.36	0.23	0.53
810	Zcchc2	uc007cgq	4.7e-07	4.17	4.05	2.98	5.27	4.34	4.22	4.03	4.79	4.05	4.04	2.9
811	Zcchc2	uc007cgt	5.4e-07	4.38	4.32	3.15	5.53	4.53	4.44	4.31	4.99	4.35	4.23	5.05
812	Zcchc2	uc007cgr	3.8e-07	5.39	5.23	3.82	6.8	5.62	5.47	5.21	6.2	5.23	5.25	5.78
813	Pign	uc007cgh	4.4e-07	1.36	0.88	0.97	1.44	1.59	1.68	1.37	1.95	1.54	1.29	3.81
814	Zcchc2	uc007cgs	4.5e-07	5.32	5.15	3.77	6.7	5.54	5.36	5.13	6.12	5.16	5.15	3.75
815	Phlpp1	uc007cgv	3.5e-14	3.71	3.71	3.16	2.88	2.76	3.65	3.37	2.48	3.59	2.79	1.84
816	Bcl2	uc007cgw	8.4e-15	1.14	1.43	0.71	1.18	3.71	1.78	2.95	3.12	0.71	1.77	2.52
817	Kdsr	uc007cgy	4.5e-10	2.03	4.75	1.28	3.53	1.95	1.71	1.88	2.36	2.25	1.74	2.01
818	Serpinb5	uc007cha	2e-18	0.01	0.46	0	0.28	0.01	0.07	0	0	0	0	35.12
819	Serpinb5	uc011wqc	1.6e-18	0.01	0.44	0	0.27	0	0.07	0	0	0	0	68.57
820	Serpinb5	uc007chb	2.1e-18	0.01	0.46	0	0.28	0.01	0.07	0	0	0	0	69
821	Serpinb12	uc007chc	4.6e-20	0.02	0.01	0	0.4	0.01	0.26	0.09	0	0.01	0.01	319.36
822	Serpinb12	uc007chd	1.2e-16	0.02	0	0	0.17	0.01	0.07	0	0.01	0	0.01	186.28
823	Serpinb12	uc007che	2e-20	0.02	0.01	0	0.42	0.01	0.27	0.1	0	0.01	0.01	193.06
824	Serpinb13	uc007chf	1e-34	0	0	0	0	0	0	0	0	0	0	166.89
825	Serpinb3a	uc007chg	3.1e-24	0	0.01	0	0.03	0	0.33	0.03	0	0.02	0	128.04
826	Serpinb3d	uc007chh	5.1e-21	0.01	0	0	0.01	0	0.01	0	0	0	0	121.37
827	Serpinb3b	uc007chi	2.4e-22	0	0.01	0	0.05	0	0.01	0	0	0	0	9.3
828	Serpinb13	uc011wqd	1.3e-34	0	0	0	0	0	0	0	0	0	0	8.89
829	Serpinb11	uc007chl	1.7e-18	0	0.08	0	0.03	0	0.04	0	0	0.01	0	24.22
830	Serpinb7	uc007chm	6.6e-15	0.01	0.01	0	0.82	0.04	0.06	0	0.02	0.12	0.01	25.56
831	Serpinb2	uc007chn	6.7e-18	1.63	0.01	0	0.09	0.01	0.03	0	0	0.03	0	7.44
832	Serpinb2	uc007chp	5.7e-18	1.62	0.01	0	0.09	0.01	0.03	0	0	0.03	0	11.08
833	Serpinb2	uc011wqe	6.2e-18	1.6	0.01	0	0.09	0.01	0.03	0	0	0.03	0	11
834	Serpinb10	uc011wqg	5.8e-12	0.41	0.04	0.02	0.07	0.03	0.08	0.03	0.03	0.03	0.02	9.98
835	Serpinb10	uc011wqf	7.9e-12	0.42	0.04	0.02	0.07	0.03	0.08	0.03	0.03	0.03	0.02	8.99
836	Serpinb8	uc007chr	4.7e-23	1.68	1.31	0.36	5.44	0.93	0.75	1.05	0.72	3.56	0.44	7.54
837	Serpinb8	uc007chs	1.6e-27	1.85	1.76	0.45	4.84	0.97	0.84	1.02	0.82	3.34	0.44	7.24
838	Serpinb8	uc007cht	1.6e-27	1.85	1.77	0.45	4.85	0.97	0.84	1.02	0.82	3.34	0.44	8.4
839	Serpinb3c	uc007chk	6.8e-32	0	0	0	0	0	0.04	0	0	0	0	20.1
840	Cdh19	uc007chx	3.3e-20	0.98	6.83	0.74	2.64	1.09	1.22	0.68	0.83	0.76	0.64	20.79
841	Dsel	uc007chy	2.9e-09	1.88	2.55	0.89	3.39	1.77	1.48	1.39	1.99	1.57	1	1.34
842	Nifk	uc011wql	2.5e-12	11.67	11.7	11.22	21.96	24.44	13.76	17.07	25.42	16.49	17.93	7.78
843	Nifk	uc007cic	2.5e-12	12.59	13.75	10.7	20.07	22.36	13.85	16.94	22.37	15.79	17.37	18.15
844	Clasp1	uc007cid	7.7e-11	5.68	4.11	5.92	9.77	6.03	8.69	6.92	5.12	7.73	5.48	12.4
845	Clasp1	uc007cie	4.2e-11	3.78	2.79	3.82	6.39	4.19	5.78	4.53	3.59	5.25	3.72	3.27
846	Clasp1	uc011wqm	3.8e-10	7.72	5.91	7.45	11.85	7.09	10.31	8.28	5.88	10.05	6.7	4.07
847	Clasp1	uc011wqn	4.4e-10	8.12	6.23	7.84	12.46	7.47	10.84	8.72	6.2	10.57	7.06	5.73
848	Clasp1	uc007cij	8.3e-12	12.59	12.6	10.6	16.35	11.49	13.95	11.42	10.81	14.16	10.59	11.73
849	Clasp1	uc007cif	7.9e-12	12.22	12.24	10.3	15.89	11.15	13.55	11.1	10.5	13.76	10.28	11.54
850	Tsn	uc007cib	3e-10	20.32	26.02	21.63	34.27	28.47	23.64	25.28	30.95	25.96	25.57	17.01
851	Clasp1	uc007cii	8.5e-12	12.54	12.56	10.57	16.3	11.45	13.91	11.39	10.78	14.12	10.56	17.16
852	Tfcp2l1	uc007cil	2.3e-11	0.55	1.14	1.53	3.7	4.39	1.72	3.83	3.62	0.94	2.53	2.27
853	Inhbb	uc007cir	5.1e-19	0.64	0.72	0.21	1.07	0.22	0.21	0.31	0.31	0.29	0.13	0.56
854	Ralb	uc007cis	3.3e-27	12.94	7.19	4.01	5.38	4.15	4.07	4.93	3.4	9.57	5.04	6.52
855	Epb4.1l5	uc007cix	8e-15	1.36	1.82	1.37	1.35	1.93	2.08	1.44	2.46	0.81	1.49	2.1
856	Epb4.1l5	uc007ciy	6.7e-15	1.34	1.81	1.36	1.34	1.92	2.07	1.43	2.44	0.81	1.49	3.3
857	Ptpn4	uc011wqt	2.8e-15	2.39	1.12	1.23	3.3	5.01	5.17	2.55	6.17	4.02	4.36	2.65
858	Ptpn4	uc007ciz	3.7e-17	2.1	0.91	1.06	3.07	4.44	4.45	2.27	5.31	3.77	3.8	1.87
859	Tmem177	uc007cja	4.5e-26	10.18	6.53	6.63	2.62	6.73	7.41	6.49	6.35	6.86	8.28	4.61
860	Tmem185b	uc007ciu	6.7e-14	4.02	3.84	1.95	2.15	2.57	2.5	2.47	3	2.91	2.29	6.83
861	Sctr	uc007cjb	4.5e-15	1.26	0.5	1.31	1.09	1.65	0.93	2.04	1.61	2.08	2.04	2.82
862	Tmem37	uc007cjd	1.3e-08	11.36	12.97	10.7	3.24	7.77	7.97	9.41	6.44	7.92	13.79	5.39
863	Dbi	uc007cje	2.4e-17	247.01	224.3	95.41	79.16	143.07	104.89	136.88	150.11	214.54	150.29	155.07
864	Sctr	uc007cjc	3.7e-15	1.29	0.51	1.35	1.12	1.69	0.95	2.09	1.66	2.13	2.1	150.45
865	Dbi	uc007cjf	2.1e-17	250.58	227.09	96.94	80.08	144.76	106.21	138.57	151.85	217.47	151.99	152.45
866	Steap3	uc007cji	1.4e-16	17.4	14	13.45	5.41	8.85	15.47	8.68	9.41	7.29	10.28	157.78
867	Steap3	uc007cjj	1.4e-16	15.33	12.33	11.85	4.77	7.79	13.62	7.65	8.28	6.42	9.06	7.55
868	En1	uc007cjm	1.1e-23	1.48	0.12	0.15	2.71	2.14	0.13	1.93	1.71	2.8	0.28	0.06
869	Marco	uc007cjl	5.9e-08	0.48	0.01	0	0	0.02	12.98	0.01	0.01	0.01	0.01	0.01
870	Insig2	uc011wqv	8.5e-12	38.33	46.66	39.36	45.28	61.61	42.42	50.37	70.06	49.08	56.44	17.75
871	Insig2	uc007cjo	2.5e-12	35.62	42.2	36.66	43.15	55.85	39.6	47.53	62.52	45.6	52.05	34.21
872	Insig2	uc007cjp	2.5e-12	32.45	38.41	33.38	39.29	50.84	36.07	43.28	56.9	41.54	47.38	30.29
873	Ccdc93	uc007cju	1.1e-14	6.41	5.47	4.02	4.21	4.14	4.72	4.18	4.15	4.8	4.37	3.41
874	Insig2	uc007cjq	2.5e-12	35.55	42.09	36.58	43.05	55.71	39.52	47.43	62.35	45.51	51.92	19.12
875	Ccdc93	uc011wqw	1.1e-14	6.41	5.47	4.02	4.21	4.14	4.72	4.18	4.15	4.8	4.37	4.54
876	Actr3	uc029qta	2.9e-08	14.4	14.41	8.54	24.37	14.73	20.07	13.11	16.09	16.7	11.76	12.74
877	Actr3	uc007ckf	2.9e-08	14.41	14.43	8.55	24.4	14.75	20.09	13.12	16.1	16.72	11.77	25.49
878	Slc35f5	uc007ckg	9.5e-19	18.03	13.22	10.38	32.67	20.63	20.04	23.8	23.42	35.55	19.32	11.59
879	Actr3	uc007cke	2.9e-08	13.39	13.4	7.95	22.66	13.7	18.66	12.19	14.96	15.53	10.94	23.44
880	Mgat5	uc007ckq	6.9e-07	0.32	0.24	0.08	0.23	0.07	0.23	0.1	0.05	0.2	0.08	1.65
881	Mgat5	uc007ckr	9.6e-11	0.58	0.53	0.2	0.46	0.15	0.44	0.2	0.11	0.41	0.12	2.4
882	Mgat5	uc007cks	6.7e-11	0.67	0.6	0.23	0.53	0.17	0.5	0.23	0.13	0.46	0.13	3.46
883	Ccnt2	uc007ckz	1.5e-11	16.06	19.75	10.72	12.06	12.97	15.04	12.71	13.1	16.55	12.08	7.63
884	Ccnt2	uc007cla	3.2e-08	15.78	19.77	10.75	12.12	13.3	14.92	12.74	14.07	16.31	12.34	14.67
885	Ccnt2	uc007clb	6.7e-12	13.88	17.46	9.09	10.18	11.09	13.02	10.75	11.05	14.55	10.39	6.94
886	Zranb3	uc007cld	2e-19	2.31	2.05	2.44	1.65	3.68	2.79	3.92	3.79	2.32	2.89	1.32
887	Zranb3	uc007cle	2.1e-19	1.89	1.66	2.02	1.41	3.07	2.3	3.25	3.15	1.91	2.39	2.38
888	Zranb3	uc007clf	1.5e-19	2.37	2.1	2.48	1.67	3.74	2.84	4	3.84	2.33	2.95	2.42
889	Rab3gap1	uc007clc	1.3e-15	17.82	17.95	12.95	22.75	16.32	14.56	15.31	16.7	19.7	14.99	10.19
890	R3hdm1	uc007clh	1.2e-17	5.89	5.5	7.06	9.63	13.21	11.58	12.25	13.97	8.89	8.91	10.97
891	R3hdm1	uc007cli	3e-17	6.95	6.96	8.15	10.97	14.54	13.18	13.72	15.09	10.07	10.15	4.7
892	R3hdm1	uc007clj	5.4e-16	19.11	23.54	20.01	22.82	29.78	28.28	27.18	31.46	23.24	22.76	10.56
893	R3hdm1	uc011wrb	5.3e-16	20.17	24.84	21.08	24.15	31.56	29.89	28.76	33.36	24.57	24.1	16.41
894	Zranb3	uc007clg	1.9e-14	1.34	1.1	1.78	1.11	2.01	2.04	2.54	2.06	1.71	1.96	0.68
895	Mcm6	uc007cln	1.9e-13	2.97	3.12	1.16	3.55	1.52	3.27	1.96	1.2	3.32	1.31	2.51
896	Mcm6	uc007clo	3.7e-13	2.1	2.22	0.84	2.48	1.07	2.33	1.38	0.89	2.32	0.96	4.28
897	Dars	uc011wrd	9.7e-09	51.56	55.44	47.42	53.31	89.77	56.21	64.1	108.91	59.51	64.26	27.84
898	Dars	uc007clp	3.2e-10	43.18	43.71	40.98	44.19	66.88	45.75	52.84	78.17	49.04	51.76	47.1
899	Ubxn4	uc007cll	3.5e-15	25.53	26.57	21.08	40.56	29.86	23.82	29.58	32.88	34.89	26.27	13.68
900	Cd55	uc007cly	5.3e-24	9.12	14.35	25.24	34.31	70.7	57.22	55.45	60.91	11.22	35.64	12.13
901	Cd55	uc007clz	1.6e-21	3.66	5.28	7	12.17	18.28	17.45	15.55	15.01	4.36	10.5	16.81
902	Cd55	uc029qte	2.4e-28	4.5	6.18	12.35	18.5	32.28	27.62	28.21	24.94	5.74	17.67	10.43
903	Pfkfb2	uc007cmd	8.2e-34	14.9	40.06	5.04	5.08	4.83	6.2	6.2	4.09	11.03	6.45	7.34
904	Pfkfb2	uc011wrg	2.8e-38	18.9	61.32	7.07	7.08	5.81	7.15	7.58	5.42	13.39	7.67	15.39
905	Pfkfb2	uc007cme	1.2e-40	16.81	53.64	6.07	6.23	4.94	6.48	6.51	4.58	11.75	6.46	17.03
906	Pfkfb2	uc007cmf	3.4e-39	17.41	56.09	6.51	6.44	5.24	6.53	6.87	4.87	12.15	6.93	16.39
907	Pfkfb2	uc007cmg	6.6e-34	14.5	48.07	4.69	4.96	4.88	6.48	5.9	5.17	9.8	6.03	16.48
908	Pfkfb2	uc011wrh	6.6e-40	18.39	51.36	6.17	6.42	5.47	7.76	7.27	4.71	13.21	7.2	16.99
909	Pfkfb2	uc011wri	8.4e-40	18.01	50.19	6	6.3	5.29	7.53	7.02	4.54	12.76	7.01	17.41
910	Thsd7b	uc007clw	3.6e-11	0.01	0.39	0.07	0.28	0.01	0.08	0.05	0.03	0.07	0.01	8.66
911	AA986860	uc007cmi	9.4e-27	0.29	0.49	0.14	0.45	0.12	0.21	0.15	0.11	0.36	0.1	4.98
912	AA986860	uc007cmj	1.5e-25	0.26	0.44	0.14	0.42	0.11	0.2	0.14	0.1	0.35	0.11	7.53
913	Pigr	uc011wrk	2.6e-14	0.04	0.08	0	0	0.01	1.95	0.02	0	0.01	0.03	17.98
914	Pfkfb2	uc011wrj	5.8e-39	14.53	39.59	5.03	5.09	4.33	5.89	5.79	3.62	10.18	5.95	24.61
915	Il20	uc007cmr	2.1e-14	0	9.33	0	0	0	0.02	0	0	0.01	0	0
916	Il20	uc011wrm	2.4e-14	0	9.81	0	0	0	0.02	0	0	0.01	0	0
917	Mapkapk2	uc007cmv	3.6e-15	163.67	117.08	106.27	128.54	102.55	96.6	130.48	80.38	196	112.68	101.88
918	Eif2d	uc007cmy	8.8e-11	13.41	12.42	11.98	8.84	12.25	11.48	12.02	10.53	10.67	13.42	12.18
919	Eif2d	uc007cmz	3.9e-12	15.95	14.91	13.96	10.16	14.1	13.33	13.8	12.11	12.65	15.47	18.13
920	Eif2d	uc011wrn	4e-12	12.76	11.94	11.17	8.15	11.29	10.67	11.08	9.68	10.07	12.37	17.86
921	Eif2d	uc007cna	3.4e-12	11.55	10.86	10.1	7.41	10.23	9.65	10.02	8.77	9.21	11.22	15.15
922	Dyrk3	uc007cmw	5.1e-10	0.13	0.12	0.01	0.14	0.01	0.17	0.01	0.01	0.03	0	7.92
923	Rassf5	uc007cnc	2.8e-12	1.18	0.85	0.34	1.95	0.49	4	0.56	0.39	0.48	0.3	3.8
924	Rassf5	uc007cnd	2.6e-12	1.05	0.76	0.3	1.74	0.44	3.53	0.5	0.35	0.43	0.27	5.83
925	Rassf5	uc011wro	2e-12	1.06	0.78	0.3	1.77	0.44	3.56	0.52	0.35	0.44	0.28	5.56
926	Ikbke	uc007cne	5.6e-14	1.55	1.11	0.39	0.68	0.38	1.84	0.34	0.26	0.31	0.32	5.27
927	Ikbke	uc007cnf	6.1e-14	1.45	1.01	0.38	0.63	0.36	1.71	0.33	0.23	0.28	0.29	4.71
928	Srgap2	uc011wrp	5.3e-19	5.55	5.79	3.41	4.19	3.19	4.29	2.99	3.44	2.96	3.13	4.58
929	Srgap2	uc007cng	6.2e-17	5.32	5.7	3.52	4.59	3.5	4.82	3.31	3.73	3	3.28	4.4
930	Srgap2	uc007cni	1.9e-15	6.4	7.17	4.65	6.62	3.92	6.1	4.09	3.83	3.26	3.69	4.52
931	Srgap2	uc011wrq	1.8e-15	4.99	5.74	3.98	6.01	4.56	6.58	4.41	4.71	3.27	3.82	3.9
932	Eif2d	uc007cnb	8.1e-11	7.32	6.79	6.55	5.14	7.16	6.26	6.76	6.15	6	7.7	5.9
933	5430435G22Rik	uc007cnp	1.1e-23	3.97	3.35	1.53	7	2.1	2.23	2.06	2	1.63	1.34	4.57
934	5430435G22Rik	uc007cnq	1.1e-23	4.1	3.46	1.57	7.25	2.14	2.27	2.12	2.03	1.67	1.35	9.3
935	5430435G22Rik	uc007cnr	3e-23	2.37	2.01	0.89	3.98	1.22	1.3	1.16	1.16	0.98	0.73	7.49
936	Slc26a9	uc007cns	6.3e-17	0	0.02	0	0.01	0	0	0	0	0	0	3.5
937	Pm20d1	uc007cnt	3.5e-27	4.51	3.47	0.25	0.08	0.37	0.28	0.44	0.32	1.41	0.43	1.68
938	Slc41a1	uc007cnu	3.6e-33	54.9	139.51	29.8	17.47	16.02	21.77	21.25	12.4	42.8	25.91	26.1
939	Rab29	uc007cnv	7.5e-18	5.48	8.13	3.53	2.36	3.77	4.75	3.51	3.36	3.31	3.72	28.8
940	Rab29	uc007cnw	1.2e-17	6.11	8.96	3.92	2.63	4.23	5.23	3.9	3.79	3.62	4.15	8.21
941	Nucks1	uc007cnx	3.3e-07	16.57	23.84	17.01	30.87	27.47	23.78	23.46	31.89	20.03	21.1	14.8
942	Nucks1	uc007cny	3.3e-07	16.56	23.83	17	30.85	27.46	23.77	23.45	31.88	20.02	21.09	20.95
943	Slc45a3	uc007cnz	2.8e-16	2.33	2.37	0.72	0.93	0.65	0.48	0.48	0.54	0.97	0.64	11.97
944	Slc45a3	uc007coa	2.3e-16	2.28	2.32	0.71	0.91	0.64	0.47	0.47	0.52	0.95	0.63	2.97
945	Elk4	uc007cob	4.8e-11	4.91	3.4	4.28	6.55	4.35	6.15	4.79	3.56	5.42	4.54	3.3
946	Elk4	uc007coc	6.2e-15	6.94	4.89	5.35	8.99	6.57	9.02	6.66	6.46	7.55	6.3	4.29
947	Srgap2	uc007cnj	6.3e-12	1.16	1.24	1.08	1.37	0.88	1.46	1.02	0.82	0.66	0.87	2.78
948	Mfsd4	uc011wrr	3.8e-17	2.66	2.97	1.02	0.25	0.74	1.39	1.12	0.58	0.86	0.9	4.65
949	Mfsd4	uc007coe	7.3e-16	2.38	2.47	0.95	0.22	0.64	1.26	1.06	0.47	0.78	0.76	8.35
950	Mfsd4	uc007cof	2.7e-16	1.9	1.98	0.75	0.17	0.52	1	0.85	0.38	0.62	0.62	7.19
951	Mfsd4	uc011wrs	2.4e-16	1.96	2.02	0.76	0.18	0.54	1.03	0.88	0.4	0.65	0.65	6.36
952	Mfsd4	uc011wrt	4.4e-25	8.73	12.07	2.8	0.98	3.52	5.31	4.02	5.07	2.54	3.66	14.9
953	Mfsd4	uc011wru	1.3e-24	6.5	8.51	2.21	0.69	2.4	3.82	2.93	3.22	1.94	2.59	20.93
954	Mfsd4	uc007cog	7.6e-25	6.81	9.09	2.29	0.74	2.61	4.08	3.12	3.59	2.03	2.75	18.64
955	Elk4	uc007cod	2.2e-09	18.01	17.43	11.6	18.85	14.69	15.32	13.26	15.79	15.13	14.05	19.27
956	Lemd1	uc007coi	2.7e-09	0	0.04	0.01	0.01	0	0	0	0	0	0	9.87
957	Klhdc8a	uc007con	2e-15	0.9	2.11	0.12	0.13	0.06	0.11	0.1	0.03	0.14	0.04	0.61
958	Nuak2	uc007cop	9.9e-15	0.96	0.96	0.31	0.5	0.33	0.82	0.37	0.29	0.47	0.3	2.74
959	Nuak2	uc007coo	2e-14	0.95	0.95	0.31	0.5	0.33	0.82	0.37	0.29	0.46	0.3	4.29
960	Cdk18	uc007coh	5e-19	3.45	4.05	2.08	0.23	0.94	1.79	1.83	0.62	2.13	1.66	3.55
961	Tmcc2	uc007cor	4.3e-13	12.26	22.17	20.23	9.91	12.44	10.15	14.82	12.09	7.15	13.24	7.95
962	Tmcc2	uc007cos	1.3e-12	10.09	18.09	16.93	8.1	9.93	8.25	12.02	9.59	5.81	10.59	11.94
963	Dstyk	uc011wrw	1.2e-11	2.7	2.44	2.28	4.23	1.94	2.43	2.47	1.57	2.89	2.06	1.24
964	Dstyk	uc007cou	4.2e-18	7.42	8.15	5.33	10.63	5.83	5.74	5.94	6.33	7.79	6.31	4.74
965	Dstyk	uc007cov	9.6e-11	1.51	1.4	1.61	2.21	0.78	1.29	1.28	0.78	1.67	1.17	4.35
966	Rbbp5	uc007cow	1.6e-09	7.65	7.63	8.32	6.43	8.99	9.37	8.85	9.17	6.64	9.21	4.42
967	Rbbp5	uc007cox	1.3e-08	9.41	9.87	9.33	7.33	10.16	10.54	9.53	11.52	7.77	10.4	8.56
968	Rbbp5	uc007coy	1.4e-08	9.62	10.11	9.47	7.54	10.33	10.69	9.66	11.88	7.92	10.59	9.86
969	Tmem81	uc007coz	7.6e-09	1.52	1.85	1.5	2.12	1.45	1.43	1.29	1.58	0.9	1.55	6.18
970	Tmcc2	uc007cot	1.3e-12	11.14	19.7	18.74	9.22	11.49	9.41	13.82	11.11	6.57	12.31	7.1
971	Cntn2	uc007cpa	1.1e-14	0.06	0.24	0.02	0	0	0.01	0	0	0.03	0.01	5.99
972	Nfasc	uc011wrx	3.3e-28	0.33	2.28	0.33	0.77	0.09	0.24	0.21	0.05	0.2	0.09	0.33
973	Nfasc	uc007cpd	2.4e-28	0.32	2.22	0.32	0.75	0.09	0.23	0.2	0.05	0.2	0.08	0.54
974	Nfasc	uc007cpf	2.9e-28	0.32	2.22	0.32	0.75	0.09	0.23	0.2	0.05	0.2	0.08	0.53
975	Nfasc	uc007cpe	1.7e-28	0.31	2.15	0.3	0.72	0.08	0.22	0.19	0.05	0.19	0.08	0.53
976	Nfasc	uc007cpg	3.6e-13	0.3	1.91	0.32	0.59	0.06	0.19	0.18	0.02	0.15	0.06	0.48
977	Pik3c2b	uc007cpr	7.7e-10	2.07	1.98	2.2	1.62	0.79	2.17	1.28	0.57	1.43	1.24	1.44
978	Pik3c2b	uc011wry	5.2e-17	5.1	5.55	5.6	4.89	3.02	5.77	3.69	2.73	3.46	3.93	4.37
979	Ppp1r15b	uc007cpt	4.9e-10	9.06	10.32	6.04	10.4	9.32	9.5	8.3	9.91	8.58	8.23	9.75
980	Ppp1r15b	uc007cps	1.4e-09	10.85	12.84	6.64	12.49	12.01	11.22	9.81	13.39	10.09	10.18	14.78
981	Plekha6	uc007cpv	3.5e-24	4.7	3.38	2.5	4.77	1.74	2.63	2.62	1.44	2.06	1.98	12.22
982	Plekha6	uc007cpu	4.8e-24	4.59	3.26	2.44	4.6	1.68	2.55	2.54	1.4	2	1.93	3.91
983	Plekha6	uc007cpx	3.1e-24	4.97	3.6	2.65	4.96	1.85	2.75	2.76	1.56	2.2	2.12	8.22
984	Etnk2	uc007cqh	5.4e-11	0.16	0.96	0.11	0.12	0.04	0.05	0.04	0.03	0.15	0.06	1.4
985	Sox13	uc007cqj	4e-16	4.53	5.26	3.23	4.27	1.23	1.72	2.11	0.79	3.39	1.91	2.62
986	Sox13	uc007cqk	4.6e-16	3.83	4.48	2.76	3.6	1.03	1.45	1.79	0.65	2.86	1.6	4.76
987	Snrpe	uc007cql	6.8e-07	22.11	27.48	14.07	21.06	26.2	21.14	17.7	31.1	20.91	18.57	19.78
988	Zc3h11a	uc007cqo	4.3e-07	30.98	29.66	29.5	31.54	40.61	35.18	35.14	44.58	29.84	31.81	31.86
989	Zc3h11a	uc007cqn	5e-07	31.13	29.85	29.68	31.69	40.67	35.24	35.32	44.67	29.96	31.89	33.66
990	Zc3h11a	uc007cqp	6e-08	20.99	19.75	19.96	22.32	28.52	27.34	25.37	28.89	22.07	22.1	27.34
991	Zbed6	uc007cqr	1.2e-16	4.06	3.99	2.6	4.71	15.1	10.24	5.02	15.65	3.82	9.68	6.5
992	Atp2b4	uc007cqu	9e-29	6.24	9.61	4.01	7.4	3.73	3.8	3.9	4.07	5.33	3.77	7.52
993	Atp2b4	uc007cqv	8.8e-29	6.36	9.78	4.08	7.53	3.8	3.87	3.98	4.15	5.43	3.84	7.51
994	Atp2b4	uc011wsc	9e-29	6.23	9.6	4	7.39	3.72	3.8	3.9	4.06	5.32	3.76	7.51
995	Atp2b4	uc007cqw	4.7e-20	4.35	5.95	2.94	5.27	1.97	2.61	3.02	1.78	3.89	2.19	5.49
996	Atp2b4	uc007cqx	6.5e-13	4.01	5.07	2.58	4.95	2.42	2.54	3.1	2.22	3.58	2.5	2.69
997	Etnk2	uc007cqi	9e-11	0.18	1.05	0.12	0.13	0.04	0.06	0.04	0.03	0.16	0.07	1.16
998	Prelp	uc007crc	1.4e-17	22.1	18.27	11.9	53.43	11.4	15.78	17.92	11.5	8.28	8.45	11.35
999	Fmod	uc007crd	2.8e-16	17.04	25.41	29.99	318.78	62.95	121.5	87.3	37.84	16.17	28.02	13.99
1000	Chit1	uc011wsd	1.3e-15	0.02	0.07	0	0.11	0	0.02	0	0	0.02	0.01	30.05
1001	Chit1	uc007crf	1.5e-15	0.02	0.07	0	0.11	0	0.02	0	0	0.02	0.01	30.45
1002	Chil1	uc007crg	3.2e-07	0.33	1.5	0.08	0.89	0.12	0.28	0.15	0.09	0.43	0.06	15.71
1003	Mybph	uc007crh	7.2e-22	2.96	25.25	19.41	109.56	18.18	0.55	5.27	37.48	1.87	5.24	36.9
1004	Btg2	uc007cre	1.9e-07	17.71	10.9	6.51	25.92	8.59	11.37	8.87	9.6	19.09	10.15	44.76
1005	Mybph	uc007cri	8.1e-22	2.72	23.99	18.54	102.49	16.77	0.54	4.89	34.63	1.76	4.85	35.48
1006	Ppfia4	uc007crm	2.9e-18	0.91	1.88	0.55	3.57	0.65	0.74	0.44	0.38	0.47	0.41	1.21
1007	Ppfia4	uc007crn	2.8e-18	0.92	1.91	0.55	3.62	0.66	0.75	0.45	0.38	0.48	0.41	1.48
1008	Ppfia4	uc007cro	5.6e-18	0.96	1.98	0.57	3.79	0.69	0.77	0.47	0.4	0.5	0.43	1.53
1009	Ppfia4	uc011wse	4.5e-19	0.46	1.23	0.31	2.16	0.35	0.36	0.24	0.19	0.28	0.22	1.18
1010	Ppfia4	uc007crp	4.2e-19	0.47	1.27	0.32	2.23	0.37	0.37	0.24	0.19	0.29	0.23	0.81
1011	Tmem183a	uc007crr	1.6e-15	7.64	8.76	6.39	12.9	9.3	7.51	7.89	11.64	7.52	8.1	8.54
1012	Tmem183a	uc007crq	1.6e-15	7.63	8.75	6.38	12.89	9.29	7.51	7.88	11.63	7.51	8.09	16.24
1013	Myog	uc007crl	5.3e-21	3.69	14.2	1.88	4.88	2.56	1.34	1.82	1.56	3.86	1.29	12.99
1014	Cyb5r1	uc007cru	1.3e-19	49.97	85.05	53.36	83.55	65.43	58.4	62.9	62.72	55.39	65.4	29.38
1015	Cyb5r1	uc007crv	2.4e-19	37.91	64.16	40.11	62.75	48.82	43.9	47.09	46.64	41.74	48.96	51.86
1016	Cyb5r1	uc007crw	4.3e-15	13.54	20.73	15.16	25.32	17.23	15.68	18.15	15.57	15.35	17.92	30.51
1017	Adipor1	uc007crx	2.9e-15	109.39	118.33	154.23	126.94	157.57	141.45	146.33	142.54	108.4	153.72	59.03
1018	Adipor1	uc007cry	3e-15	103.72	112.18	146.24	120.35	149.39	134.09	138.72	135.13	102.77	145.73	99.38
1019	Klhl12	uc007csa	2.3e-10	18.61	16.7	13.57	19.01	19.87	16.55	17.26	22.62	20.62	20.08	8.06
1020	Klhl12	uc007csb	2.8e-10	18.44	16.59	13.48	18.88	19.72	16.41	17.13	22.44	20.47	19.89	15.15
1021	Tmem183a	uc007crs	5.1e-10	2.67	2.58	2.79	4.59	2.58	2.37	2.85	2.95	2.64	2.35	10.22
1022	Rabif	uc007csc	1.7e-08	9.34	10.53	7.63	9.18	10.42	10.32	8.48	11.18	8.52	8.94	6.57
1023	Kdm5b	uc007csg	8.6e-20	3.42	3.8	2.85	3.7	3.34	3.8	3.49	3.07	3.08	2.92	4.69
1024	Kdm5b	uc011wsg	3.4e-22	3.59	4.21	2.9	3.88	3.51	3.95	3.55	3.39	3.25	3.05	8.25
1025	Ppp1r12b	uc007csl	9.9e-15	62.4	30.41	52.12	105.46	43.96	51.99	68.75	32.15	111.68	47.38	24.12
1026	Ppp1r12b	uc007csm	4.5e-17	55.5	23.8	46.02	103.43	46.57	50.3	66.86	35.71	105.49	47.1	44.55
1027	Ppp1r12b	uc007csn	7.7e-18	50.24	18.15	42.65	103.04	46.64	50.04	66.41	35.93	100.04	45.88	38.35
1028	Ppp1r12b	uc007cso	3.6e-21	4.76	4.31	3.36	6.3	3.48	3.62	5.03	2.72	11.35	3.47	4.69
1029	Lgr6	uc007csq	2.7e-13	0.96	0.93	0.29	0.13	0.08	0.17	0.32	0.09	0.13	0.03	1.85
1030	Ube2t	uc007csp	2.3e-16	8.45	4.96	2.63	4.04	4.27	4.37	4.42	4.43	9.04	3.22	2.99
1031	Ptpn7	uc007css	4.2e-09	0.81	0.28	0.08	0.7	0.19	1.65	0.16	0.17	0.2	0.11	3.24
1032	Ptpn7	uc007cst	3.9e-09	0.8	0.28	0.08	0.69	0.19	1.62	0.16	0.17	0.2	0.11	0.62
1033	Ptpn7	uc011wsh	4.2e-09	0.83	0.28	0.08	0.72	0.2	1.69	0.16	0.18	0.21	0.12	0.63
1034	Gpr37l1	uc007csv	5.7e-22	0.61	4.44	0.54	1.02	0.28	0.29	0.23	0.16	0.48	0.27	0.72
1035	Elf3	uc007csx	1.8e-17	0.22	1.44	0.54	0.08	0.16	0.34	0.23	0.14	0.4	0.26	2.65
1036	Elf3	uc007csw	1.7e-17	0.22	1.49	0.56	0.09	0.17	0.35	0.24	0.14	0.41	0.26	4.05
1037	Rnpep	uc011wsi	2.7e-26	15.09	13.77	9.45	3.36	6.9	10.55	7.3	6.63	7.19	8.02	12.05
1038	Rnpep	uc007csy	1e-25	14.87	13.49	9.37	3.35	6.7	10.32	7.29	6.38	7.08	7.83	19.77
1039	Arl8a	uc007csu	1.3e-20	12.85	18.79	8.89	18.53	6.18	10.31	8.3	5.45	11.53	7.01	18.97
1040	Timm17a	uc007csz	1.1e-12	94.75	111.61	72.8	99.39	104.18	83.02	94.54	94.01	117.64	118.16	54.23
1041	Shisa4	uc007ctc	1e-07	55.57	54.28	82.22	63.98	46.46	79.88	76.11	33.99	74.99	62.44	42.35
1042	Ipo9	uc011wsj	5.1e-16	9.82	10.56	9.65	13.85	9.99	9.76	9.79	9.9	10.53	10.32	7.66
1043	Ipo9	uc011wsk	6.2e-16	10.13	10.85	9.94	14.24	10.29	10.05	10.08	10.19	10.86	10.64	9.15
1044	Ipo9	uc007cte	3.3e-17	9.54	10.05	9.46	13.48	9.63	9.58	9.59	9.33	10.38	10.08	8.94
1045	Ipo9	uc007ctf	1.9e-08	6.27	5.6	6.78	9.39	6.15	6.83	7.01	4.84	7.75	7.07	6.64
1046	Nav1	uc007cti	5e-25	6.86	7.75	3.36	9.89	3.04	3.9	3.02	3.03	4.23	2.7	4.63
1047	Nav1	uc007ctg	4.6e-27	5.69	6.38	2.86	8.03	2.37	3.22	2.43	2.32	3.49	2.14	4.16
1048	Nav1	uc007ctj	4.1e-27	5.69	6.37	2.86	8.02	2.36	3.2	2.43	2.31	3.49	2.14	3.76
1049	Nav1	uc007ctk	3.7e-18	2.32	2.41	1.41	2.63	0.39	1.3	0.77	0.23	1.32	0.48	0.77
1050	Nav1	uc007ctl	3.3e-16	2.85	2.95	1.69	3.42	0.47	1.58	0.91	0.28	1.61	0.6	1.64
1051	Lmod1	uc007cta	1.8e-17	2.75	6.16	3.12	1.35	1.12	5.15	2.94	0.97	1.57	1.38	1.88
1052	Nav1	uc011wsl	8.8e-17	2.16	2.16	1.3	2.42	0.34	1.12	0.67	0.2	1.22	0.44	1.65
1053	Csrp1	uc007cto	3.5e-25	29.92	66.31	16.95	28.58	15.23	17.05	15	10.63	25.68	18.25	37.36
1054	Phlda3	uc007ctq	1.4e-18	39.36	17.57	88.1	119.25	76.4	91.78	102.71	52.66	65.67	100.96	99.4
1055	Lad1	uc007ctt	1.4e-16	0.01	0.36	0.02	0.17	0.02	0.28	0.02	0	0.05	0.01	24.16
1056	Tnnt2	uc007ctu	1.6e-29	17.14	34.13	15.39	47.68	3.9	0.37	2.91	1.1	19.44	2.16	5.5
1057	Tnnt2	uc007ctv	1.6e-29	17.19	34.24	15.44	47.83	3.91	0.37	2.92	1.11	19.51	2.17	5.54
1058	Tnnt2	uc007cua	1.8e-29	17.31	34.47	15.54	48.04	3.92	0.37	2.93	1.1	19.64	2.18	5.56
1059	Tnnt2	uc007ctw	1.8e-29	17.37	34.59	15.59	48.19	3.94	0.37	2.94	1.11	19.7	2.19	5.59
1060	Tnnt2	uc007ctx	1.8e-29	17.44	34.69	15.65	48.39	3.95	0.37	2.95	1.11	19.79	2.2	5.6
1061	Tnnt2	uc011wso	1.6e-29	17.14	34.1	15.37	47.39	3.84	0.37	2.9	1.07	19.44	2.13	5.56
1062	Pkp1	uc007cub	7e-18	0.01	0.36	0	0.51	0.01	0.17	0.05	0.03	0.01	0	66.34
1063	Pkp1	uc011wss	9.2e-19	0	0.16	0	0.31	0	0.07	0.02	0.01	0	0	88.42
1064	Igfn1	uc007cud	1.2e-16	0.22	0.09	4.62	3.61	2.49	0.08	0.85	3.77	1.62	3.4	22.67
1065	Igfn1	uc007cuc	4.1e-17	0.22	0.08	4.14	3.2	2	0.08	0.73	2.95	1.43	2.76	0.04
1066	Igfn1	uc011wst	3.1e-22	0.22	0.1	3.62	4.01	2.72	0.08	0.9	4.62	1.64	3.34	0.04
1067	Tmem9	uc011wsv	3.3e-16	4.82	6.86	3.05	3.09	1.83	1.49	2.2	1.91	2.49	2.18	7.89
1068	Tmem9	uc007cue	2.5e-16	5.26	7.49	3.33	3.38	1.98	1.63	2.39	2.04	2.73	2.37	9.98
1069	Tmem9	uc011wsw	2.5e-16	5.15	7.34	3.26	3.31	1.94	1.59	2.34	2	2.67	2.32	10.27
1070	Tmem9	uc011wsx	1.2e-16	6.46	9.24	3.95	4.09	2.47	1.96	2.85	2.53	3.2	2.88	11.27
1071	Cacna1s	uc007cuf	2.8e-12	163.97	143.87	221.99	159.79	119.22	131.74	180.82	98.94	137.28	146.51	38.16
1072	Igfn1	uc011wsu	1.9e-18	0.19	0.09	3.51	3	1.58	0.06	0.64	2.28	1.34	2.23	38.17
1073	Cacna1s	uc007cug	2.8e-12	165.52	145.19	224.09	161.27	120.38	133.02	182.57	99.9	138.58	147.91	38.48
1074	Kif21b	uc007cul	1.6e-07	0.45	0.23	0.15	0.23	0.09	2.06	0.11	0.08	0.15	0.09	38.82
1075	5730559C18Rik	uc007cuo	4.2e-16	0	0.07	0	0.02	0.01	0.01	0.01	0	0.01	0	2.33
1076	5730559C18Rik	uc007cup	1.4e-16	0	0.01	0	0.01	0	0	0	0	0	0	2.03
1077	Camsap2	uc011wsz	9.5e-14	5.47	6.03	3.13	6.79	4.7	4.7	4.26	5.26	5.87	3.96	3.92
1078	Camsap2	uc007cuq	8.3e-14	4.47	4.87	2.54	5.53	3.78	3.83	3.43	4.19	4.8	3.18	7
1079	Camsap2	uc007cur	8.3e-14	4.5	4.9	2.56	5.57	3.8	3.86	3.46	4.22	4.83	3.2	6.2
1080	Camsap2	uc011wta	4.1e-14	2.88	2.81	1.66	3.74	2.31	2.5	2.23	2.05	3.32	2.11	4.47
1081	Kif21b	uc007cum	1.7e-07	0.44	0.22	0.14	0.23	0.09	2.02	0.1	0.08	0.14	0.09	1.69
1082	Ddx59	uc007cut	6.6e-08	3.84	2.69	4.1	4.19	4	3.74	4.51	3.18	4.91	4.6	1.98
1083	Ddx59	uc007cuu	9.8e-13	6.32	5.33	6.29	6.39	7.41	6.06	7.45	6.5	7.88	7.56	4.61
1084	Nek7	uc007cvn	7.5e-25	21.72	33.06	58.87	75	100.86	67.88	76.05	116.45	57.45	86.32	16.7
1085	Nek7	uc011wtb	1.5e-24	22.06	33.99	59.76	76.72	102.03	69.28	78	118.07	58.27	86.83	33.82
1086	Nek7	uc007cvo	7.8e-24	5.28	6.95	14.82	17.47	25.59	16.84	19.15	28.84	14.99	20.33	20.5
1087	Dennd1b	uc007cvy	8.5e-10	0.53	0.44	0.67	0.65	1.34	1.11	0.72	1.44	0.66	1.43	0.52
1088	Dennd1b	uc007cwb	6.6e-12	4.11	3.53	3.77	3.17	6.39	5.6	4.34	8.5	3.69	6	2.86
1089	Dennd1b	uc007cvz	6.6e-12	4.18	3.58	3.83	3.22	6.49	5.69	4.42	8.64	3.75	6.1	4.72
1090	Dennd1b	uc011wtc	2.4e-11	4.37	3.8	3.97	3.32	6.72	5.84	4.6	9.06	3.88	6.25	2.47
1091	Aspm	uc007cwh	1.3e-10	0.1	0.03	0.01	0.06	0.07	0.13	0.06	0.04	0.04	0.02	2.35
1092	Cfh	uc007cws	3e-19	21.23	21.59	2.86	15.48	7.5	9.6	6.26	7.48	4.1	3.44	13.21
1093	Cfh	uc007cwt	3e-19	22.1	22.47	2.97	16.12	7.8	10	6.51	7.78	4.27	3.58	26.85
1094	Cfh	uc011wtg	3e-19	21	21.36	2.83	15.32	7.42	9.5	6.19	7.39	4.06	3.4	26.71
1095	Cfh	uc007cwu	3.4e-17	3.48	1.95	0.4	2.89	0.93	1.5	1.14	0.77	0.61	0.52	1.39
1096	B3galt2	uc007cwy	5.3e-24	4.15	6.07	0.62	13.63	1.35	3.84	1.29	1.81	4.08	0.73	1.31
1097	Glrx2	uc007cwz	7.3e-09	11.76	13.78	12.35	10.07	17.53	13.74	13.23	20.18	11.26	16.06	8.25
1098	Glrx2	uc007cxa	7.3e-09	11.44	13.41	12.02	9.8	17.05	13.37	12.88	19.63	10.96	15.62	11.79
1099	Glrx2	uc011wtj	7.9e-09	11.32	13.29	11.9	9.7	16.86	13.23	12.74	19.41	10.85	15.45	11.57
1100	Glrx2	uc007cxb	7.3e-09	11.84	13.88	12.44	10.14	17.65	13.83	13.32	20.32	11.34	16.17	11.77
1101	Cdc73	uc007cwx	1.7e-10	8.39	8.23	6.87	13.72	14.06	11.76	11.01	14.53	11.66	10.46	10.62
1102	Glrx2	uc007cxc	7.6e-09	11.97	14.02	12.59	10.28	17.86	14	13.48	20.55	11.47	16.36	10.68
1103	Uchl5	uc007cxf	9.7e-10	14.11	13.92	16.33	16.13	29.83	21.64	19.08	36.02	15.38	19.84	14.13
1104	Trove2	uc007cxd	2.2e-07	1.87	3.23	1.22	3	1.88	2.18	1.46	2.41	2.02	1.42	9.87
1105	Rgs2	uc007cxg	4.4e-25	11.98	14.36	2.41	7.22	3.83	7.49	4.84	3.36	7.13	2.52	9.84
1106	Uchl5	uc007cxe	9.7e-10	14.08	13.9	16.3	16.1	29.79	21.6	19.05	35.96	15.35	19.81	8.13
1107	Rgs18	uc007cxl	8.8e-09	0.87	0.68	0.21	1.36	0.62	0.81	0.41	0.77	0.26	0.25	0.48
1108	Pla2g4a	uc007cxt	2.5e-16	1.6	1.68	0.59	2.59	1.21	1.38	1.06	0.89	0.83	0.4	3.04
1109	Tpr	uc007cyb	1.5e-09	23.09	18	17.23	25.81	25.37	23.71	23.42	24.73	25.85	22.94	8.96
1110	Tpr	uc007cyc	1.1e-12	10.66	6.14	8.33	13.25	14.77	13.72	11.3	14.29	13.6	11.68	11.89
1111	Tpr	uc007cyd	2.8e-13	13.72	8.4	10.86	17.14	19.03	16.96	14.89	18.75	17.55	15.61	7.11
1112	Tpr	uc007cye	2.9e-07	36.72	29.76	26.65	39.86	37.66	35.26	38.06	36.87	40.51	34.66	18.4
1113	Prg4	uc007cyh	5.7e-20	15.77	4.03	1.81	116.3	13.45	10.74	16.64	8.96	12.06	4.17	15.49
1114	Prg4	uc007cyg	3.6e-20	11.63	2.93	1.26	81.13	8.29	7.39	11.49	5.29	8.23	2.63	11.98
1115	Tpr	uc007cyf	4.3e-07	34.69	28.27	25.03	37.43	33.97	32.72	35.8	33.42	37.62	32.41	18.38
1116	Hmcn1	uc007cyj	7.7e-25	1.03	0.49	0.24	0.53	0.27	0.28	0.22	0.22	0.19	0.28	14.42
1117	Ivns1abp	uc007cym	4e-21	58.57	44.59	26.63	38.94	45.32	55.54	46.29	45.51	52.85	30.93	79.57
1118	Ivns1abp	uc007cyo	1.1e-20	151.76	120.69	69.18	93.21	129.72	146.65	122.74	134.88	133.93	90.73	294.81
1119	Ivns1abp	uc007cyn	1e-20	150.55	119.93	68.9	92.88	129.16	145.7	122.16	133.75	133.49	90.01	428.91
1120	Ivns1abp	uc007cyp	8.5e-21	122.5	99.95	54.8	75.89	102.35	116.08	96.73	105.93	107.9	71.37	174.1
1121	Trmt1l	uc007cyr	3e-10	2.64	1.73	2.12	1.23	1.65	2.12	1.95	1.52	1.95	1.69	173.35
1122	Trmt1l	uc007cys	4.5e-10	1.22	0.81	0.98	0.58	0.76	0.98	0.9	0.7	0.91	0.78	1.55
1123	Trmt1l	uc007cyt	2.1e-12	9.22	6.87	6.07	4	6.71	7.39	7.14	6.83	7.39	5.78	3.41
1124	Trmt1l	uc007cyu	7e-14	9.31	7.33	6.13	4.28	6.64	7.26	7.28	6.68	7.56	5.87	6.1
1125	Trmt1l	uc007cyv	1.8e-17	15.68	14.16	10.58	6.55	11.35	11.6	11.59	11.76	12.29	9.8	9.51
1126	Trmt1l	uc007cyw	1.8e-17	16.96	15.33	11.44	7.08	12.29	12.56	12.54	12.74	13.31	10.61	13.16
1127	Trmt1l	uc029qua	7.1e-17	19.61	18.25	12.94	8.05	14.38	14.37	14.47	15.04	15.46	12.22	14.76
1128	Rnf2	uc007cyx	3.6e-08	10.2	8.67	7.52	16.11	12.98	14.06	11.72	15.49	16.49	9.98	8.42
1129	Fam129a	uc011wtn	1.2e-23	1.94	2.27	1.47	7.94	1.71	1.61	2.03	0.91	9.1	1.34	1.28
1130	Fam129a	uc007cyz	6.2e-33	7.37	5.98	3.65	22.58	4.46	4.11	5.68	2.84	31.79	3.34	5.35
1131	Fam129a	uc011wto	5.9e-33	7.1	5.75	3.51	21.74	4.3	3.96	5.47	2.73	30.6	3.21	8.41
1132	Fam129a	uc007cza	2.2e-33	8.45	6.6	3.98	25.2	4.84	4.49	6.3	3.12	36.34	3.62	9.03
1133	Edem3	uc007czb	1.2e-07	0.7	0.52	1	1.33	0.99	0.93	1.15	0.89	1.05	0.93	5.34
1134	Edem3	uc007czc	3.9e-14	8.23	7.95	9.31	15.6	16.49	10.9	12.35	19.24	11.75	13.13	5.52
1135	Edem3	uc011wtp	4.2e-14	8.28	8	9.36	15.68	16.58	10.97	12.42	19.34	11.82	13.2	10.19
1136	Rnf2	uc007cyy	3.6e-08	9.62	8.18	7.09	15.19	12.24	13.26	11.06	14.61	15.55	9.41	11.34
1137	1700025G04Rik	uc007czd	8.7e-32	9.04	1.25	5.45	16.71	12.32	8.3	11.94	11.31	8.89	8.99	9.01
1138	1700025G04Rik	uc007cze	4.9e-36	15.36	2.65	11.81	24.33	21.58	14.57	20.69	20.19	13.77	18.97	7.13
1139	Edem3	uc011wtq	4.2e-14	8.3	8.02	9.38	15.71	16.61	10.99	12.44	19.38	11.84	13.22	9.47
1140	Colgalt2	uc007czg	1.9e-13	2.99	3.45	1.91	1.78	2.03	1.84	1.85	1.86	2.42	1.74	6.33
1141	Tsen15	uc007czf	1.4e-07	7.21	6.8	4.97	4.38	5.59	4.95	5.3	5.83	5.35	5.34	4.27
1142	Colgalt2	uc011wtr	2.5e-13	2.9	3.34	1.86	1.73	1.97	1.79	1.8	1.81	2.37	1.69	4.24
1143	Arpc5	uc007czj	2.1e-14	17.64	21.9	7.81	22.73	13.37	20.47	10.87	14.74	13.28	9.73	21.05
1144	Rgl1	uc007czh	1.3e-14	6.75	7.72	3.84	6.8	3.7	5.04	3.97	3.29	4.3	3.81	24.07
1145	Arpc5	uc007czk	2.5e-14	22.87	28.38	10.06	29.35	17.5	26.62	14.06	19.38	17.12	12.63	30.55
1146	Ncf2	uc007czm	4.2e-09	1.01	0.49	0.21	1	0.38	0.99	0.27	0.3	0.33	0.23	27.99
1147	Smg7	uc007czn	6.9e-08	15.48	16.14	16.33	19.13	18.36	17.97	18	18.65	17.03	18.57	7.56
1148	Smg7	uc007czo	6.1e-08	15.46	16.12	16.27	19.18	18.36	18.01	17.99	18.69	17.03	18.51	15.04
1149	Smg7	uc007czp	7.7e-08	15.44	16.1	16.29	19.08	18.31	17.93	17.96	18.61	16.99	18.52	7.6
1150	Lamc2	uc007czr	5.8e-25	0.52	0.85	0.28	1.68	0.43	0.46	0.85	0.39	1.72	0.28	10.4
1151	Lamc1	uc007czu	9.7e-20	18.39	20.49	18.03	48.44	15.41	17.26	20.09	14.36	17.87	13.05	8.38
1152	Dhx9	uc007czz	3.4e-08	21.02	18.54	15.11	30.54	23.03	25.64	21.2	22.83	24.28	18.5	17.17
1153	Dhx9	uc007daa	4.5e-08	20.02	17.61	14.68	29.76	22.8	24.72	20.7	22.37	23.37	18.4	15.09
1154	Dhx9	uc007dab	2e-10	4.34	3.65	3.21	6.91	4.51	5.36	4.58	3.88	5.21	3.87	8.88
1155	Npl	uc007dac	7.7e-09	1.21	1.47	1.98	1.36	1.82	1.88	1.41	1.82	0.83	1.86	0.62
1156	Rgs16	uc007dae	3.3e-13	0.89	1.82	0.3	0.71	0.28	0.47	0.38	0.16	0.9	0.27	0.41
1157	Rnasel	uc007daf	1.5e-07	2.24	1.09	0.55	1.55	0.86	1.41	0.75	0.74	0.64	0.68	0.91
1158	Rnasel	uc007dag	3.8e-08	2.1	1.22	0.61	1.65	0.97	1.51	0.73	1.06	0.6	0.73	1.13
1159	Rnasel	uc011wtu	7.8e-08	2.37	1.12	0.56	1.6	0.88	1.48	0.77	0.77	0.67	0.71	1.15
1160	Rnasel	uc007dah	7e-08	1.38	0.64	0.34	0.97	0.5	0.86	0.45	0.45	0.4	0.4	0.87
1161	Rnasel	uc007daj	7.1e-08	2.25	1.52	0.74	1.97	1.28	1.78	0.85	1.51	0.64	0.93	0.82
1162	Glul	uc007daq	8.4e-26	80.27	219.53	113.45	72.13	49.17	81.21	70.38	63.26	48.88	41.43	31.12
1163	Mr1	uc007day	1.5e-21	10.74	16.09	15.3	26.31	27.8	14.92	27.67	26.16	18.03	23.39	7.89
1164	Mr1	uc007daz	3.6e-21	11.31	17.12	16.07	27.65	29.64	15.82	29.34	28.03	19.13	24.81	9.57
1165	Mr1	uc011wtv	1.5e-21	11.03	16.58	15.69	27.09	28.69	15.38	28.52	27	18.57	24.1	9.7
1166	Stx6	uc007dbb	1.6e-18	5.97	7.74	4.68	6.07	4.44	4.86	4.46	3.7	4.77	4.1	4.69
1167	Stx6	uc007dbc	1.7e-10	6.51	7.05	5.04	6.16	4.41	4.73	4.5	3.84	5.32	3.81	8.3
1168	Mr1	uc007dba	4.2e-20	2.76	3.37	4.18	6.76	5.23	3.67	7.14	4.16	4.81	5.11	4.75
1169	Xpr1	uc007dbf	1.9e-31	8.74	8.23	28.12	27.84	36.5	25.47	37.26	42.83	11.08	30.33	4.48
1170	Xpr1	uc007dbg	2.5e-32	3.28	2.71	12.52	13.88	15.73	11.22	17.08	15.64	5.04	13.12	5.67
1171	Xpr1	uc007dbh	4.6e-30	4.78	3.66	18.04	19.76	22.78	16.19	25.11	22.96	7.37	18.63	3.74
1172	Stx6	uc007dbd	3.6e-11	1.69	1.93	1.47	1.45	0.81	1.12	1.04	0.73	1.04	0.78	3.33
1173	Qsox1	uc007dbp	1.2e-19	4.83	6.45	4.43	13.37	3.24	3.18	6.02	2.03	7.62	3.46	11.01
1174	Qsox1	uc007dbo	9.1e-20	5.66	7.52	5.28	16.14	3.97	3.73	7.36	2.46	9.21	4.24	24.83
1175	Qsox1	uc011wtx	1.3e-19	5.41	7.12	4.98	15.14	3.72	3.5	6.88	2.29	8.63	3.95	26.51
1176	Qsox1	uc007dbq	6.8e-11	0.29	0.27	0.28	0.96	0.19	0.16	0.36	0.09	0.37	0.18	13.09
1177	Cep350	uc007dbs	3.1e-07	7.04	7.86	6.85	7.63	9.12	8.96	8.21	9.85	8.34	8.31	8.9
1178	Tor1aip1	uc011wtz	8e-14	48.87	42.16	51.73	57.65	62.47	51.31	56.27	66.26	53.36	58.86	19.22
1179	Tor1aip1	uc007dbw	4.3e-14	42.87	36.97	46.12	50.59	54.21	44.78	49.17	57.31	46.65	51.14	35.94
1180	Tor1aip1	uc007dbu	1.5e-13	42.93	37.17	46.08	49.88	53.75	44.55	48.71	57.23	46.45	50.72	33.81
1181	Tor1aip1	uc007dbv	4.4e-14	42.33	36.5	45.53	49.94	53.52	44.22	48.55	56.58	46.06	50.49	33.6
1182	Acbd6	uc011wtw	1.1e-09	8.51	9.45	7.15	7.39	7.56	5.66	6.74	7.67	7.73	6.89	21.27
1183	Tor1aip2	uc011wub	5.7e-09	27.41	25.9	26.39	28.37	39.81	28.05	31.93	47.05	31.92	34.8	17.54
1184	Tor1aip2	uc007dbx	6.5e-23	8.15	7.94	6.85	12.01	8.87	8.97	9.33	8.1	12.13	7.68	17.93
1185	Tor1aip2	uc007dby	5.7e-09	29.95	28.31	28.83	31.01	43.51	30.66	34.89	51.43	34.88	38.03	19.13
1186	Tor1aip2	uc007dcb	5.7e-09	30.62	28.9	29.44	31.68	44.38	31.3	35.62	52.46	35.62	38.79	29.25
1187	Tor1aip2	uc007dca	6.2e-09	31.25	29.53	30.02	32.23	45.29	31.94	36.34	53.59	36.32	39.55	29.21
1188	Tor1aip2	uc007dcc	1.8e-20	6.43	6.65	4.7	10.28	7.4	7.25	7.27	7.08	10.48	5.74	19.13
1189	Tor1aip1	uc011wua	4.6e-14	40.37	34.85	43.4	47.62	51.02	42.17	46.28	53.94	43.93	48.14	20.27
1190	Soat1	uc007dcj	1.1e-12	1.33	1.38	0.45	1.19	1.01	2.01	0.74	0.97	0.88	0.64	3.3
1191	Abl2	uc011wuf	1.9e-16	5.17	3.76	4.78	7.47	5.22	5.7	5.67	5.7	7.31	5.87	2.47
1192	Abl2	uc007dcl	1.9e-16	5.04	3.66	4.68	7.31	5.09	5.57	5.54	5.55	7.15	5.73	4.85
1193	Soat1	uc007dck	2.2e-08	0.68	0.48	0.24	0.53	0.5	1.17	0.45	0.36	0.47	0.36	3.75
1194	Tor3a	uc007dcn	3.1e-23	4.94	5.4	3.04	6.66	3.13	4.94	3.56	2.73	4.48	3.35	5.47
1195	Tor3a	uc007dco	5.7e-17	3.8	3.9	2.37	5.25	1.65	3.57	2.44	1.29	3.04	2.22	7.19
1196	Fam20b	uc007dcp	5.4e-21	34.1	29.13	25.48	19.81	39.97	27.14	36.82	40.14	32.79	42.82	15.64
1197	Fam20b	uc007dcq	5.5e-21	33.39	28.53	24.96	19.39	39.13	26.58	36.05	39.3	32.11	41.92	24.7
1198	Fam20b	uc007dcr	4.9e-10	3.07	2	2.73	2.01	3.27	2.81	3.99	2.78	3.52	4.02	13.3
1199	Ralgps2	uc007dcs	7e-10	0.79	1.43	0.35	0.62	0.43	2.85	0.28	0.31	0.36	0.23	2.44
1200	Ralgps2	uc011wui	8.2e-10	0.73	1.29	0.32	0.6	0.39	2.82	0.27	0.28	0.35	0.21	2.58
1201	Ralgps2	uc007dcw	8.2e-10	0.72	1.27	0.32	0.59	0.38	2.78	0.27	0.27	0.35	0.21	2.42
1202	Ralgps2	uc007dcx	8.4e-10	0.73	1.28	0.32	0.6	0.39	2.81	0.27	0.28	0.35	0.21	2.41
1203	Ralgps2	uc011wuj	7.8e-10	0.72	1.28	0.32	0.6	0.39	2.8	0.27	0.28	0.35	0.21	2.43
1204	Ralgps2	uc007dcu	8.1e-10	0.73	1.28	0.32	0.6	0.39	2.8	0.27	0.28	0.35	0.21	2.43
1205	Ralgps2	uc007dcv	8.5e-10	0.72	1.26	0.31	0.59	0.38	2.77	0.27	0.27	0.35	0.21	2.41
1206	Ralgps2	uc007dcy	2.7e-07	0.49	0.7	0.21	0.49	0.23	2.54	0.2	0.16	0.28	0.15	1.94
1207	Ralgps2	uc007dda	4.8e-07	0.34	0.54	0.13	0.36	0.15	1.81	0.15	0.12	0.2	0.1	0.95
1208	Abl2	uc011wug	1.9e-16	5.17	3.76	4.78	7.47	5.22	5.7	5.67	5.7	7.31	5.87	2.94
1209	Angptl1	uc007ddc	3.7e-18	10.57	7.17	3.78	7.53	6.15	6.42	5.13	4.48	4.33	2.94	21.25
1210	Ralgps2	uc007ddb	5.1e-07	0.33	0.53	0.13	0.36	0.15	1.8	0.15	0.11	0.19	0.1	19.26
1211	Rasal2	uc007ddg	7.3e-19	3.23	5.5	1.95	3.19	2.35	2.66	2.37	2.16	3.42	2.37	1.28
1212	Angptl1	uc007ddd	4.6e-19	15.45	10.78	5.19	9.91	9.28	9.16	7	7.68	5.68	4.03	31.02
1213	2810025M15Rik	uc007ddi	3.5e-19	6.5	8.4	3.79	5.07	3.76	4.1	3.63	3.09	5.67	4.57	33.81
1214	BC026585	uc007ddj	1.1e-09	0.81	0.95	0.32	0.34	0.33	0.65	0.31	0.32	0.3	0.29	4.96
1215	BC026585	uc007ddk	2.3e-09	1.07	1.19	0.36	0.4	0.48	0.89	0.4	0.45	0.43	0.4	1.89
1216	Sec16b	uc007ddm	1.7e-19	1.4	1.62	0.78	3.72	0.92	1.05	0.96	0.74	0.66	0.63	2.53
1217	Sec16b	uc007ddl	2.4e-19	1.44	1.67	0.81	3.83	0.95	1.08	0.99	0.76	0.68	0.66	3.07
1218	Sec16b	uc007ddn	2e-19	1.47	1.7	0.82	3.88	0.97	1.09	1	0.78	0.68	0.66	3.13
1219	Sec16b	uc007ddo	2.3e-15	0.88	1.13	0.53	2.6	0.49	0.68	0.7	0.39	0.41	0.41	1.09
1220	Rfwd2	uc007ddz	1.3e-12	4.45	4.99	4.57	3.35	7.43	5.8	5.33	9.34	3.95	6.85	2.19
1221	4930523C07Rik	uc007dec	1.5e-09	5.54	5.31	2.19	3.01	2.26	4.05	2.3	2.51	3.99	2.33	2.26
1222	Tnn	uc007dee	1e-13	0	0	0	0	0.36	2.58	0.23	0	0	0.36	3.01
1223	Cacybp	uc007deg	1.2e-09	32.85	29.45	22.82	23	46.86	36.5	32.75	67.28	27.24	33.66	15.84
1224	Rabgap1l	uc007deh	5.1e-13	2.1	2.29	0.79	3.62	1.21	2.22	0.93	1.41	1.22	0.9	17.6
1225	Rabgap1l	uc007dej	7.3e-07	3.84	4.47	2.39	5.26	3.59	3.42	2.99	3.75	3.94	2.63	2.45
1226	Rabgap1l	uc007dek	7.8e-09	2.97	3.38	2.03	4.92	2.72	2.77	2.6	2.73	3.43	2.3	4.04
1227	Zbtb37	uc007deo	1.8e-08	1.04	1.06	0.46	0.99	0.98	1.19	0.75	1.05	1.18	0.78	1.59
1228	Zbtb37	uc007dep	8.6e-08	1.06	1.07	0.46	0.99	0.96	1.16	0.77	1	1.19	0.76	1.06
1229	Zbtb37	uc007des	6.6e-07	0.54	0.43	0.18	0.44	0.41	0.6	0.36	0.46	0.58	0.33	38.89
1230	Dars2	uc007dey	4.5e-20	9.21	7.23	6.22	3.94	8.2	6.97	7.35	8.01	7.45	8.84	4.49
1231	Cenpl	uc007dfe	6.9e-07	0.4	0.47	0.23	0.37	0.46	0.56	0.31	0.44	0.34	0.28	1.65
1232	Dars2	uc007dez	2.7e-18	9.9	7.44	6.78	4.52	9.08	7.85	8.37	8.61	8.46	10.04	5.51
1233	Klhl20	uc007dfh	6.1e-07	2.06	1.77	2.03	2.36	1.58	2.1	1.92	1.54	1.85	1.71	3.64
1234	Prdx6	uc007dfl	5.4e-36	89.48	72.75	42.89	60.26	46.25	36.95	48.52	45.58	87.99	51.97	57.93
1235	Prdx6	uc007dfm	2.3e-36	89.81	73.7	42.59	60.43	47.1	37.72	48.87	46.98	88.95	52.34	117.13
1236	Suco	uc007dft	1.2e-07	3.4	5.37	2.94	4.98	5.14	4.45	3.58	6.02	3.41	3.97	2.73
1237	Pigc	uc007dfy	2.4e-10	6.94	7.71	6.75	6.27	9.37	6.83	7.04	10.08	6.89	8.96	3.03
1238	Pigc	uc007dfx	2.6e-10	6.91	7.7	6.74	6.28	9.34	6.81	7.02	10.04	6.88	8.95	6.06
1239	Dnm3	uc007dfz	5e-08	1.23	1.48	1.2	0.67	1.32	1.09	1.18	1.13	0.83	1.17	0.29
1240	Dnm3	uc007dga	4.8e-13	0.74	0.96	0.67	0.37	1	0.67	0.7	1.18	0.53	0.7	0.41
1241	Dnm3	uc007dgb	4.8e-13	0.74	0.96	0.68	0.37	1	0.67	0.71	1.18	0.53	0.7	0.41
1242	Dnm3	uc007dgd	1.1e-08	1.19	1.43	1.1	0.67	1.18	1.02	1	1.03	0.76	1.01	0.44
1243	Mettl13	uc007dgh	7.5e-08	2.48	2.58	3.48	2.87	2.14	2.63	2.56	1.64	2.22	2.46	2.02
1244	Mettl13	uc011wuq	1.6e-07	2.89	3.02	4.04	3.41	2.57	3.13	3.06	1.98	2.65	2.97	4.25
1245	Mettl13	uc007dgi	9.3e-08	0.58	0.59	0.84	0.68	0.43	0.53	0.54	0.29	0.55	0.42	2.71
1246	Vamp4	uc007dgl	3.4e-11	6.21	11.64	5.41	10.93	8.13	7.35	7.69	8.88	6.32	6.37	13.12
1247	Prrc2c	uc007dgo	8.7e-09	15.21	16.96	9.78	18.06	11.9	13.13	11.85	13.48	14.93	9.89	9.2
1248	Prrc2c	uc007dgp	5.8e-13	13.12	13.5	8.99	14.66	9.33	11.55	10.07	9.36	13.33	8.2	15.71
1249	Prrc2c	uc007dgq	1.8e-12	13.53	13.77	9.3	15.2	9.76	12	10.53	9.83	13.88	8.58	13.24
1250	Prrc2c	uc007dgr	8.4e-14	11.1	10.62	7.8	13.76	8.28	10.79	9.4	7.91	12.33	7.27	11.33
1251	Prrc2c	uc007dgs	7.3e-14	9.01	7.85	6.51	12.76	7.21	9.91	8.67	6.48	11.16	6.36	7.33
1252	Prrc2c	uc007dgt	1.7e-13	7.43	6.22	5.45	10.61	5.3	8.3	7.12	4.67	9.39	5.1	4.79
1253	Prrc2c	uc007dgu	2.5e-11	3.14	2.52	2.36	4.53	2.19	3.22	3.11	1.87	4.1	2.27	2.99
1254	Fmo1	uc007dgx	5.7e-25	26.53	28.9	10.17	9.13	12.94	15.41	14.16	13.56	17.93	13.91	11.28
1255	Fmo1	uc007dgy	1.4e-25	24.79	27.44	9.78	8.71	11.62	14.68	13.82	11.12	17.01	12.86	20.67
1256	Fmo2	uc007dgz	1.8e-27	41.44	15.38	5.75	19.98	7.68	8	9.15	7.35	9.85	7.81	19.79
1257	Fmo2	uc007dha	5.2e-29	39.39	14.66	5.53	19.02	7.21	7.65	8.79	6.73	9.42	7.42	19.81
1258	Fmo2	uc007dhb	5.3e-29	39.78	14.79	5.58	19.19	7.28	7.72	8.88	6.8	9.51	7.5	19.05
1259	Prrx1	uc007dhi	2.4e-11	25.43	31.33	22.36	43.89	28.19	16.84	28.07	30.18	50.74	25.84	11.26
1260	Prrx1	uc007dhh	2.3e-11	25.09	30.9	22.07	43.32	27.82	16.63	27.7	29.75	50.12	25.5	22.37
1261	Prrx1	uc007dhk	1.2e-14	4.43	5	4.98	7.46	4.54	3.3	5.21	3.94	8.99	5.02	2.66
1262	Mettl11b	uc011wus	1.3e-27	1.55	23.91	11.93	0.08	27.83	0.33	12.18	18.86	18.73	35.59	2.31
1263	Myoc	uc007dgm	2.8e-28	26.99	26.85	26.76	216.42	17.96	17.81	38.29	17.36	13.62	13.4	7.22
1264	Kifap3	uc007dho	4.9e-10	12.71	13.91	14.77	13.58	21.08	14.62	17.66	24.32	14.22	17.62	12.55
1265	Kifap3	uc007dhp	3.7e-09	14.9	16.79	16.95	15.32	24.23	16.57	19.79	28.4	16.2	20.11	13.32
1266	Scyl3	uc011wuu	2.4e-11	3.23	3.59	2.51	4.27	2.86	3.42	2.83	2.97	2.88	2.59	9.55
1267	Scyl3	uc007dhr	1.9e-11	3.06	3.38	2.37	4.03	2.69	3.23	2.66	2.79	2.72	2.44	4.43
1268	Mettl11b	uc011wut	1.7e-27	1.58	24.38	12.14	0.08	28.38	0.34	12.48	19.29	19.17	36.45	2.89
1269	Scyl3	uc007dhq	2.1e-11	3.08	3.41	2.39	4.05	2.72	3.25	2.68	2.82	2.74	2.46	2.9
1270	Scyl3	uc007dht	4.1e-08	3.08	3.58	2.29	4.17	2.95	3.25	2.71	3.24	2.68	2.46	2.53
1271	Mettl18	uc007dhv	9.2e-17	3.34	4.1	3.64	1.97	5.32	4.38	4.3	6.14	3.25	4.38	4.19
1272	Mettl18	uc007dhw	9.6e-17	3.25	3.95	3.49	1.89	5.1	4.23	4.12	5.88	3.14	4.21	3.86
1273	Sele	uc007dhx	2.4e-09	0.02	0.09	0.01	0.67	0.07	0.09	0.05	0.03	0.07	0.05	2.22
1274	Sell	uc011wuv	2.3e-07	1.32	0.24	0.05	0.04	0.17	15.3	0.14	0.2	0.21	0.18	0.21
1275	Sell	uc007dhy	2.7e-07	1.27	0.23	0.05	0.04	0.16	15.01	0.14	0.19	0.22	0.17	0.29
1276	Sell	uc011wuw	2.8e-07	1.28	0.23	0.06	0.04	0.16	15.13	0.14	0.19	0.22	0.17	0.29
1277	F5	uc007dic	3.1e-15	1.4	0.22	0.01	0.02	0.02	0.18	0.02	0.01	0.02	0.02	1.33
1278	Slc19a2	uc007die	1.6e-19	4.24	6.31	4.28	1.76	3.41	3.54	3.32	4.08	3.09	4.63	3.63
1279	Slc19a2	uc007did	1.3e-19	4.15	6.15	4.21	1.74	3.37	3.47	3.28	4	3.03	4.55	5.22
1280	Blzf1	uc007dih	8.9e-08	9.32	8.94	8.42	9.71	13.48	11.32	11.86	14.45	11.08	11.66	5.37
1281	Blzf1	uc007dii	9.1e-08	9.12	8.75	8.24	9.5	13.19	11.08	11.61	14.14	10.84	11.41	10.57
1282	Ccdc181	uc007dif	1.3e-12	8.9	9.19	6.97	6.25	13.43	7.17	9.21	13.1	8.85	9.17	9.28
1283	Nme7	uc007dik	1.4e-11	0.57	0.71	0.31	0.41	0.62	0.44	0.4	0.61	0.28	0.46	4.61
1284	Nme7	uc007dil	1e-11	0.92	1.15	0.51	0.72	1.05	0.74	0.67	0.97	0.42	0.8	1.54
1285	Nme7	uc007dim	1.3e-13	1.18	1.47	0.63	0.91	1.3	0.93	0.82	1.22	0.59	0.93	2.4
1286	Nme7	uc007din	1.3e-13	1.23	1.53	0.65	0.94	1.35	0.97	0.85	1.27	0.62	0.96	2.89
1287	Blzf1	uc007dig	9.9e-08	9.27	8.9	8.39	9.69	13.41	11.27	11.81	14.38	11.04	11.6	7.1
1288	Nme7	uc007dio	1.1e-13	1.57	1.94	0.82	1.2	1.73	1.24	1.08	1.61	0.78	1.22	7.19
1289	Dpt	uc007diq	1.1e-20	69.73	71.17	30.55	73.35	53.3	37.25	39.58	73.03	27.43	26.86	80.79
1290	Atp1b1	uc007dip	4.6e-31	285.4	346.7	115.1	303.78	78.91	85.7	163.83	67.55	382.41	124.77	164.33
1291	Sft2d2	uc007dix	6.5e-22	10.15	10.3	7.89	11.42	9.26	11.14	8.46	9.57	6.03	8.37	7.83
1292	Sft2d2	uc007diy	6.7e-22	10.28	10.44	7.97	11.57	9.39	11.26	8.57	9.71	6.11	8.47	15.75
1293	Tiprl	uc007diz	1.2e-07	8.12	8.53	5.31	7.46	7.87	8.51	6.4	9.68	7.63	6.52	4.54
1294	Gpr161	uc011wuy	1.2e-13	0.38	0.34	0.23	0.63	0.1	0.3	0.16	0.04	0.17	0.08	4.53
1295	Mpc2	uc007djd	1.3e-12	315.98	326.12	207.58	181.16	351.35	217.03	269.03	395.23	303.25	378.18	107.25
1296	Dcaf6	uc007djb	1e-26	61.02	56.91	84.66	89.44	118.04	83.19	104.32	127.15	89.59	105.77	22.2
1297	Mpzl1	uc007djg	3.8e-22	7.59	12.37	4.49	7.06	4.79	4.29	4.26	3.88	6.77	5.11	28.4
1298	Mpzl1	uc007dji	2.9e-22	6.22	10.08	3.73	5.82	3.76	3.54	3.62	3.14	5.59	4.13	11.26
1299	Mpzl1	uc007djh	2.6e-22	6.01	9.79	3.64	5.67	3.61	3.41	3.5	3.03	5.4	3.99	4.91
1300	Rcsd1	uc007djk	2.1e-19	44.39	40.14	56.56	70.14	50.74	66.6	59.69	48.2	28.42	58.95	21.01
1301	Rcsd1	uc007djj	4.1e-19	43.18	39.12	55.26	68.16	49.11	64.98	58.04	46.61	27.62	57.09	41.53
1302	Creg1	uc007djm	1.9e-19	41.96	47.03	41.52	25.61	36.27	37.62	37.47	47.27	26.36	36.82	16.09
1303	Creg1	uc011wvb	1.9e-19	39.13	43.85	38.72	23.88	33.82	35.08	34.94	44.07	24.58	34.33	31.11
1304	Cd247	uc007djn	1.4e-08	1.07	1.07	1.68	0.29	1.13	3.66	1.05	0.88	0.6	2.04	15.34
1305	Dusp27	uc007dkh	1.7e-15	19.65	17.73	21.15	46.24	19.04	19.03	24.7	15.82	33.55	19.68	6.29
1306	Dusp27	uc007dki	1.7e-15	19.67	17.75	21.17	46.29	19.05	19.05	24.73	15.83	33.58	19.7	6.36
1307	Gpa33	uc007dkj	2.4e-34	0	0	0	0	0	0	0	0	0	0	6.32
1308	Ildr2	uc011wvd	3.3e-16	2.32	1.74	0.38	1.92	0.72	0.61	0.58	0.53	0.46	0.32	0.71
1309	Ildr2	uc011wve	3.3e-16	2.36	1.77	0.38	1.96	0.74	0.62	0.6	0.54	0.47	0.32	1.31
1310	Ildr2	uc011wvf	3.3e-16	2.34	1.75	0.38	1.94	0.73	0.61	0.59	0.53	0.46	0.32	1.31
1311	Ildr2	uc011wvg	3.3e-16	2.53	1.9	0.41	2.1	0.79	0.67	0.64	0.58	0.5	0.35	1.35
1312	Ildr2	uc011wvh	3.4e-16	2.4	1.81	0.39	2	0.75	0.63	0.61	0.55	0.47	0.33	1.37
1313	Ildr2	uc011wvi	3.5e-16	2.42	1.81	0.39	2.01	0.75	0.64	0.61	0.55	0.48	0.33	1.34
1314	Ildr2	uc011wvj	3.1e-16	2.69	2.05	0.43	2.25	0.86	0.7	0.68	0.63	0.53	0.37	1.43
1315	Tada1	uc007dkl	1e-19	1.03	2.93	1.22	0.77	0.52	1.18	0.9	0.49	1	0.63	1.46
1316	Pogk	uc011wvk	7.9e-14	4.36	5.45	4.63	3.63	6.12	4.89	4.89	6.42	3.59	5.47	2.6
1317	Pogk	uc007dkp	4.4e-14	4.21	5.26	4.47	3.51	5.87	4.72	4.72	6.15	3.46	5.26	5.11
1318	Pogk	uc007dko	1.3e-10	4.82	5.89	5.32	3.83	5.7	5.23	5.36	5.41	3.96	5.38	5.36
1319	Gm4846	uc011wvl	4.8e-14	0	0	0	0	0	0	0	0	0	0	2.88
1320	Tada1	uc007dkm	5.1e-13	5.68	9.63	4.47	4	4.8	5.72	4.33	5.41	4.82	4.33	4.88
1321	Fam78b	uc007dkt	6.9e-19	1.18	1.82	1.12	0.57	1.63	1.96	1.19	1.7	0.78	0.77	5.13
1322	Fam78b	uc011wvo	8.4e-19	1.13	1.76	1.08	0.58	1.57	1.88	1.16	1.64	0.75	0.74	0.96
1323	Fam78b	uc007dks	6.9e-19	1.18	1.82	1.12	0.58	1.63	1.96	1.19	1.7	0.78	0.77	0.57
1324	Uck2	uc007dku	2.1e-12	7.24	6.64	5.19	18.29	7.36	12.46	9.1	5.4	9.94	5.25	5.26
1325	Tmco1	uc007dkv	4.3e-09	11.52	13.79	9.04	7.16	12.33	11.04	10.14	15.59	9.02	9.6	11.3
1326	Mgst3	uc007dky	3.9e-13	261.35	227.6	199.88	113.4	93.99	219	156.16	60.91	196.68	146.67	148.65
1327	Aldh9a1	uc007dkx	2e-25	10.93	10.68	2.44	2.72	3.48	9.95	4.62	3.22	6.71	2.43	154.87
1328	Rxrg	uc007dla	6.9e-23	15.85	14.95	29.82	6	23.67	24.81	22.09	18.4	10.02	23.29	12.55
1329	Rxrg	uc007dlb	6.2e-22	20.96	18.97	37.7	7.64	29.31	30.41	27.82	22.99	13.06	29.26	14.62
1330	Lrrc52	uc007dkz	2.6e-27	9.82	26.78	1	1.19	2.82	1.87	5.48	0.62	28.29	0.88	10.74
1331	Pbx1	uc007dld	1.5e-13	3.36	3.05	2.04	2.67	2.12	2.27	2.63	2.59	3.91	2.2	2.95
1332	Pbx1	uc007dle	3.6e-17	9.34	11.18	5.57	7.99	6.23	6.14	6.19	6.58	10.05	6.16	10.94
1333	Pbx1	uc007dlf	2.3e-17	9.36	11.27	5.56	8.05	6.24	6.13	6.21	6.62	10.07	6.16	10.76
1334	Pbx1	uc011wvp	2.3e-17	9.42	11.4	5.56	8.03	6.26	6.17	6.19	6.63	10.06	6.19	10.86
1335	Pbx1	uc007dlg	1.2e-12	1.6	1.51	1.07	1.88	0.86	1.13	1.27	0.83	2.24	0.97	6.15
1336	Lmx1a	uc007dlc	7.6e-28	0.06	19.52	0.14	0.21	0.12	0.17	0.1	0.11	0.11	0.08	0.08
1337	Nuf2	uc007dlj	3.7e-08	0.26	0.07	0.05	0.1	0.32	0.44	0.24	0.24	0.15	0.11	1.06
1338	Nuf2	uc007dlk	3.7e-08	0.26	0.08	0.05	0.1	0.31	0.44	0.24	0.23	0.15	0.11	1.59
1339	Rgs5	uc007dlm	2e-14	155.11	103.63	108.14	68.4	87.69	100.82	110.5	84.5	165.56	116.83	36.22
1340	Rgs4	uc007dln	2.1e-23	16.39	20.41	6.66	5.83	6.33	6.59	7.09	5.48	16.16	7.05	3.54
1341	Hsd17b7	uc007dlp	1.1e-22	1.15	1.94	2.28	4.2	3.61	2.66	4.06	3.46	1.05	2.24	5.19
1342	3110045C21Rik	uc007dls	3.3e-10	0.73	1.35	0.75	0.65	1.54	1.04	1.31	1.97	0.38	1.11	0.45
1343	Hsd17b7	uc007dlq	9.7e-15	0.64	0.99	1.42	2.55	1.66	1.57	2.59	1.28	0.68	1.17	1.07
1344	Ddr2	uc011wvr	8.3e-14	8.16	14.77	4.93	16.46	8.76	8.72	8.08	9.32	5.58	5.47	4.7
1345	Ddr2	uc007dlu	7.8e-14	7.89	14.28	4.77	15.91	8.46	8.43	7.82	9.01	5.39	5.29	7.94
1346	Uap1	uc007dlw	4.2e-10	35.26	32.93	28.16	45.52	38.17	37.29	37.53	37.58	37.37	34.28	20.3
1347	Uap1	uc007dlx	4.2e-10	35.22	32.89	28.12	45.46	38.12	37.24	37.48	37.53	37.33	34.24	39.23
1348	Uap1	uc007dly	4.4e-10	35.96	33.58	28.73	46.41	38.94	38.07	38.29	38.36	38.14	35	39.62
1349	Uap1	uc007dlz	5.9e-09	22.2	18.44	18.03	28.73	24.24	24.37	24.66	23.27	24.15	21.75	31.2
1350	3110045C21Rik	uc007dlr	3.3e-10	0.74	1.37	0.76	0.66	1.57	1.05	1.33	2.01	0.38	1.13	11.59
1351	Uhmk1	uc007dma	1e-07	3.63	2.68	2.67	2.69	4.06	4.44	3.41	4.4	4.96	3.62	1.26
1352	Atf6	uc007dmj	1.1e-18	13.57	13.09	8.4	17.11	10.5	10.4	11.93	10.58	15.19	9.52	6.4
1353	Dusp12	uc007dmk	4.7e-08	7.63	9	5.22	5.72	7.83	6.8	6.96	9.15	5.74	6.74	11.72
1354	Dusp12	uc007dml	2.7e-08	5.22	6.17	3.62	3.92	5.4	4.57	4.78	6.26	4.03	4.72	8.99
1355	Dusp12	uc007dmm	5.7e-08	5.24	6.19	3.62	3.95	5.39	4.64	4.81	6.31	3.94	4.64	7.33
1356	Dusp12	uc007dmn	5.1e-08	5.19	6.13	3.58	3.91	5.34	4.59	4.77	6.24	3.9	4.6	7.31
1357	Fcgr2b	uc011wvv	1.4e-08	6.36	6.63	1.87	8.73	5.21	6.63	3.29	5.46	3	2.19	4.29
1358	Fcgr2b	uc007dms	1.4e-08	5.98	6.23	1.74	8.17	4.86	6.27	3.07	5.09	2.8	2.05	8.26
1359	Fcgr2b	uc007dmt	1.1e-08	6.43	6.74	1.89	8.86	5.3	6.64	3.31	5.54	3.06	2.21	8.32
1360	Olfml2b	uc007dmi	3.6e-14	4.29	5.48	2.26	8.09	2.69	3.11	2.83	1.72	2.86	1.75	8.42
1361	Fcgr2b	uc007dmv	1.6e-08	2.11	1.69	0.57	2.5	1.05	2.12	0.88	1.01	0.8	0.52	5.27
1362	Fcgr3	uc007dmy	1.5e-12	10.5	6.6	2.56	10.91	4.89	4.31	4.22	4.77	3.75	2.71	5.64
1363	Fcgr3	uc011wvw	1.5e-12	10.11	6.35	2.46	10.52	4.71	4.14	4.07	4.59	3.6	2.61	11.06
1364	Fcgr3	uc007dmz	1.5e-12	10.13	6.36	2.47	10.55	4.72	4.15	4.08	4.6	3.61	2.61	10.86
1365	Mpz	uc007dnc	3.2e-19	23.54	185.39	33.34	60.61	17.9	21.48	19.14	7.36	21.87	13.28	19.12
1366	Sdhc	uc007dnb	6e-21	481.95	414.83	302.6	156.82	201.32	303.7	248.56	161.27	434.69	292.78	198.92
1367	Pcp4l1	uc009uzy	5.8e-32	58.76	77.14	17.96	11.49	26.46	35.49	22.99	12.88	204.34	13.3	21.74
1368	Mpz	uc007dnd	3.1e-19	24.84	195.63	35.18	63.95	18.89	22.66	20.19	7.77	23.07	14.01	30.36
1369	Pcp4l1	uc007dne	5.8e-32	58.32	76.56	17.83	11.4	26.26	35.23	22.82	12.78	202.81	13.2	10.73
1370	Tomm40l	uc007dni	1.6e-17	29.22	28.9	19.6	10.23	14.49	18.08	17.15	12.21	25.2	21.55	24.67
1371	Tomm40l	uc007dnj	1.6e-17	28.15	27.83	18.88	9.85	13.96	17.41	16.52	11.77	24.27	20.75	13.45
1372	Fcer1g	uc007dnl	9.7e-08	14.62	13.93	4.64	14.56	9.04	12.82	6.52	9.03	6.94	5.65	21
1373	Ndufs2	uc007dnm	2.2e-16	682.48	664.14	530.2	225.8	358.81	452.59	428.19	278.46	454.28	491.79	258.18
1374	B4galt3	uc007dnp	2.7e-15	5.78	6.23	5.16	3.06	2.75	3.91	3.57	2.64	3.68	3.34	4.36
1375	B4galt3	uc007dnq	2.6e-15	5.58	6.05	4.99	3	2.71	3.79	3.48	2.55	3.56	3.28	8.34
1376	Ndufs2	uc011wvz	2.3e-16	614.8	598.45	477.55	204.17	323.13	407.72	385.82	250.96	409.29	443.01	229.99
1377	Ppox	uc007dns	4.2e-15	9.63	12.08	7.81	8.28	3.58	6.92	5.32	2.98	6.19	5.25	232.67
1378	Usp21	uc011wwa	6.1e-13	8.31	9.64	7.42	4.98	4.63	6.31	5.58	3.84	5.25	5.15	11.34
1379	Usp21	uc011wwb	9.7e-14	7.62	8.67	6.79	4.42	3.72	5.33	4.86	3.08	4.67	4.25	8.8
1380	Usp21	uc007dnu	6e-10	10.24	12.27	9.82	6.36	5.58	8.55	6.99	4.04	6.53	6.26	9.71
1381	Usp21	uc007dnv	4.5e-11	2.57	2.72	2.4	1.53	1	1.73	1.49	0.79	1.48	1.3	5.68
1382	B4galt3	uc007dnr	2.7e-14	5.83	6.37	5.21	3.2	2.91	3.93	3.66	2.73	3.77	3.44	5.79
1383	Ufc1	uc007dnw	4.2e-18	60.13	71.83	72.17	66.63	88.48	54.16	74.32	86.96	62.05	86.7	41.64
1384	Nit1	uc007dob	2.7e-10	24.2	24.87	19.43	14.93	18.05	16.18	19.65	16.05	20.47	19.02	46.3
1385	Nit1	uc007doa	3.7e-10	24.34	25.11	19.67	15.07	18.36	16.36	19.96	16.35	20.69	19.38	18.95
1386	Pfdn2	uc007doc	5.3e-14	53.62	60.44	47.15	61.95	31.3	39.5	46.43	27.71	57.96	36.12	41
1387	Pvrl4	uc011wwc	5.1e-14	0.08	0.27	0.03	0.21	0.05	0.14	0.05	0.03	0.04	0.03	38.36
1388	Pvrl4	uc007dof	4.7e-14	0.08	0.26	0.03	0.21	0.05	0.14	0.05	0.03	0.04	0.03	17.38
1389	Arhgap30	uc007doh	4.3e-07	1.99	1.04	0.34	2.36	0.81	5.95	0.61	0.8	0.62	0.46	9.56
1390	Arhgap30	uc007doi	4.3e-07	1.92	1.01	0.33	2.29	0.78	5.76	0.59	0.78	0.6	0.45	1.85
1391	Usf1	uc007doj	7.1e-11	6.45	6.71	5.74	4.46	2.32	4.7	4.13	1.61	4.23	3.42	5.25
1392	Usf1	uc007dok	7.3e-11	5.89	6.1	5.21	4.04	2.11	4.28	3.75	1.46	3.83	3.11	8.29
1393	Usf1	uc007dol	7.5e-11	6.14	6.43	5.45	4.28	2.21	4.47	3.95	1.54	4.03	3.27	8.11
1394	Usf1	uc007dom	1.4e-10	6.96	7.18	6.12	4.79	2.46	4.93	4.37	1.76	4.5	3.69	8.85
1395	F11r	uc007doo	9.7e-32	18.45	13.04	6.95	4.78	5.83	6.38	5.71	5.28	10.04	8.12	13.14
1396	Alyref2	uc007dop	3.7e-15	1.21	1.53	0.98	0.87	0.5	1.15	0.66	0.47	0.76	0.6	13.57
1397	Cd84	uc007dpf	4.9e-07	1.05	0.63	0.15	1.02	0.88	1.94	0.57	0.67	0.26	0.37	0.65
1398	Cd84	uc007dpe	4.9e-07	1.05	0.63	0.15	1.02	0.88	1.94	0.57	0.67	0.26	0.37	1.17
1399	Vangl2	uc007dpi	4.5e-13	0.17	0.17	0.1	0.2	0.03	0.08	0.08	0.02	0.13	0.04	1.56
1400	Vangl2	uc011wwi	4.2e-13	0.17	0.18	0.1	0.19	0.03	0.08	0.08	0.02	0.13	0.04	1.32
1401	Slamf6	uc007dph	1.9e-07	0.13	0.03	0	0.02	0.01	1.34	0.01	0.01	0.02	0.01	0.01
1402	Copa	uc007dpl	3.5e-13	5.3	4.92	6.01	10.35	6.62	7.01	8.11	6.13	7.6	6.13	2.33
1403	Copa	uc007dpn	1.1e-07	52.94	57.92	51.71	66.31	53.97	54.82	58.09	49.88	63.97	52.09	28.8
1404	Copa	uc007dpo	3.5e-09	18.98	19.98	18.66	26.68	21.75	20.4	23.07	19.47	23.73	20.13	35.57
1405	Copa	uc007dpp	3.9e-07	57.77	68.63	52.03	60.69	55.95	53.39	54.72	53.32	63.22	54.14	40.28
1406	Pex19	uc011wwj	8.2e-15	55.26	54.24	43.79	38.57	43	39.74	42.08	39.96	51.87	54.55	52.16
1407	Pex19	uc007dpq	1e-12	54.91	53.21	44.1	39.67	42.06	39.42	42.84	38.45	51.67	54.18	42.06
1408	Dcaf8	uc007dpr	3.1e-07	22.43	20.91	44.64	42.16	22.73	27.65	34.44	16.69	27.86	27.46	32.96
1409	Dcaf8	uc007dps	1.6e-19	29.18	27.93	51.29	56.01	46.4	37.64	48.15	40.34	38.52	45.56	26.09
1410	Dcaf8	uc007dpt	6.9e-21	35.36	33.05	62.08	67.14	57.19	45.5	58.6	50.87	47.83	55.76	30.89
1411	Dcaf8	uc007dpu	3.1e-24	62.79	64.51	98.35	96.89	90.29	72.34	90.19	85.68	77.17	94.66	45.27
1412	Dcaf8	uc007dpv	5.1e-24	59.82	61.41	93.56	91.91	85.66	68.66	85.54	81.24	73.34	89.91	55.78
1413	Dcaf8	uc007dpw	3.3e-24	62.09	63.82	97.31	95.81	89.26	71.53	89.19	84.71	76.3	93.59	55.48
1414	Ncstn	uc007dpk	7.3e-15	21.02	21.67	17.55	19.59	11.6	14.85	14.46	9.51	18.29	15	39.18
1415	Pea15a	uc007dpy	8.7e-28	44.52	55.08	20.69	24.52	21.85	20.57	20.35	18.44	30.07	21.91	31.37
1416	Casq1	uc007dpz	1.6e-37	628.65	1036.82	2391.46	1129.02	2442.57	1625.13	1820.89	2525.1	708.24	2499.64	170.97
1417	Casq1	uc007dqa	6.8e-38	601.14	930.97	2375.43	1143.74	2342.88	1625.79	1846.58	2401.52	701.28	2381.33	292.57
1418	Dcaf8	uc007dpx	3.3e-24	50.56	51.98	79.17	78.08	72.67	58.22	72.63	68.94	62.07	76.19	165.12
1419	Atp1a4	uc011wwk	7.6e-13	0.03	1.13	0.34	0.13	0.26	0.17	0.16	0.27	0.04	0.26	23.06
1420	Atp1a2	uc007dqc	4.2e-25	547.58	719.02	424.32	617.42	211.11	231.56	329.7	182.62	591.49	292.59	167.22
1421	Atp1a2	uc011wwl	4.2e-25	550.5	722.84	426.58	620.71	212.24	232.8	331.45	183.59	594.63	294.15	335.28
1422	Igsf8	uc007dqb	1.1e-20	6.34	9.32	3.07	2.11	0.67	2	1.32	0.64	2.83	1.15	171.31
1423	Igsf8	uc007dqe	2e-20	7.53	11.67	3.37	1.98	0.79	2	1.54	0.78	3.26	1.33	6.94
1424	Atp1a2	uc007dqd	1.1e-14	461.79	428.26	416.18	501.41	139.61	208.4	294.93	95.99	478.63	224.18	162.4
1425	Kcnj10	uc007dqj	8.1e-15	0.06	0.58	0.05	0.18	0.03	0.13	0.03	0.02	0.04	0.02	12.93
1426	Slamf9	uc007dql	7.3e-16	2.43	1.7	0.63	5.19	1.2	1.56	1.04	1.14	1.11	0.86	3.94
1427	Igsf9	uc007dqm	2.5e-08	0.15	0.15	0.01	0.07	0.01	0.05	0.03	0.01	0.02	0.01	2.47
1428	Igsf9	uc007dqn	4.1e-14	0.32	0.33	0.09	0.17	0.02	0.17	0.06	0.02	0.1	0.03	1.94
1429	Igsf9	uc011wwm	6.3e-14	0.33	0.34	0.09	0.17	0.03	0.18	0.05	0.02	0.09	0.03	3.1
1430	Igsf9	uc011wwn	3.8e-14	0.32	0.33	0.09	0.17	0.02	0.17	0.06	0.02	0.09	0.03	3.08
1431	Tagln2	uc007dqp	1.7e-24	56.08	52.47	18.79	38.35	12.67	23.94	17.08	10.73	33.22	13.08	64.35
1432	Vsig8	uc007dqs	1.4e-20	0.01	0.03	0	0.01	0	0.03	0	0	0	0	7.71
1433	Vsig8	uc007dqt	7.1e-20	0.01	0.03	0.01	0.01	0	0.03	0	0	0	0	8.26
1434	Dusp23	uc007dqw	3.3e-27	15.6	18.83	28.71	2.86	14.84	13.58	16.21	16.67	7.73	19.86	16.29
1435	Ackr1	uc007drg	7.9e-17	1.49	4.22	2.33	6.99	2.33	2.33	2.58	1.83	2.36	1.67	1.75
1436	Cadm3	uc007drh	5.5e-26	2.02	6.79	2.78	7.59	1.78	2.28	2.2	1.46	1.9	1.14	3.82
1437	Cadm3	uc007dri	3e-26	1.91	6.52	2.64	7.21	1.66	2.2	2.1	1.34	1.8	1.08	4.03
1438	Cadm3	uc007drj	3.4e-20	0.68	2.73	0.94	3.14	0.61	0.93	0.85	0.51	0.79	0.4	2.65
1439	Cadm3	uc007drk	2.4e-18	0.86	3.47	1.31	3.76	0.74	1.09	1.06	0.56	0.9	0.56	1.3
1440	AI607873	uc007dru	2.8e-09	2.89	3.34	1.58	5.58	3.03	2.67	1.98	4.1	1.65	1.52	1.45
1441	AI607873	uc011www	8.8e-10	2.46	2.62	1.31	4.64	2.14	2.3	1.76	2.61	1.41	1.16	2.51
1442	Ifi204	uc007drv	3.3e-09	3.41	3.25	1.87	4.72	4.34	2.73	2.58	5.68	1.66	2.01	3.04
1443	Ifi204	uc029qut	6.2e-09	4.57	4.45	2.66	6.35	5.86	3.69	3.48	7.65	2.21	2.76	4.62
1444	Mndal	uc007dry	9.2e-09	12.28	9.98	3.81	2.83	5.91	13.18	4.81	7.07	6.34	5.16	3.45
1445	Mndal	uc007drz	1.1e-08	14.09	11.49	4.29	3.37	6.78	14.2	5.63	7.6	7.91	5.8	6.86
1446	Ifi203	uc007dsc	2.3e-09	8.94	7.89	2.91	2.1	4.32	7.93	3.38	5.56	5.3	3.5	4.45
1447	Ifi203	uc007dsd	1.8e-09	8.77	7.71	2.83	2.06	4.2	7.77	3.3	5.42	5.18	3.44	4.36
1448	Ifi203	uc007dse	2e-09	9.32	8.24	3.03	2.14	4.54	8.31	3.54	5.88	5.59	3.73	4.5
1449	Ifi203	uc007dsf	1.8e-09	9.08	7.98	2.93	2.13	4.35	8.04	3.42	5.61	5.37	3.56	4.58
1450	Ifi203	uc007dsg	8.3e-11	8.36	7.14	2.59	1.72	3.77	7.29	3.05	4.7	4.75	3.12	4.17
1451	Ifi203	uc007dsh	2.3e-09	9.26	8.18	3.01	2.18	4.48	8.22	3.5	5.77	5.5	3.63	4.22
1452	Ifi203	uc007dsi	3.3e-12	6.08	5.02	1.72	1.07	2.37	5.39	2.2	2.56	3.27	1.97	3.38
1453	Ifi203	uc007dsj	1.2e-10	2.47	2.03	0.69	0.66	1.02	2.44	0.89	1.27	1.4	0.9	1.45
1454	Ifi202b	uc011wwx	4.2e-18	0	0.93	0.01	0.01	0	0	0	0	0	0	2.69
1455	Ifi202b	uc007dsk	4.3e-18	0	0.93	0.01	0.01	0	0	0	0	0	0	4.68
1456	Pydc3	uc007drt	1.5e-10	0.79	0.77	0.43	0.07	0.4	1.82	0.33	0.42	0.42	0.48	2.7
1457	Ifi205	uc007dsm	1.4e-07	3	1.27	1.96	3.69	3.95	3.17	2.14	6.17	1.44	1.81	0.94
1458	Fmn2	uc007dtd	1.2e-24	0.08	8.66	0.09	0.17	0.1	0.1	0.08	0.05	0.11	0.03	0.08
1459	Fmn2	uc011wxb	1.1e-22	0.11	13.35	0.12	0.25	0.15	0.14	0.12	0.08	0.16	0.05	0.15
1460	Grem2	uc007dtf	3.6e-28	0.2	2.06	3.53	0.48	9.6	4.07	3.74	8.2	0.09	2.41	0.58
1461	Rgs7	uc007dtg	1.4e-08	0.53	7.72	0.05	0.21	0.08	0.2	0.06	0.27	0.19	0.06	0.48
1462	Rgs7	uc007dth	1.1e-10	0.47	7.26	0.04	0.2	0.09	0.2	0.05	0.28	0.17	0.06	0.43
1463	Rgs7	uc007dti	9.8e-11	0.49	7.44	0.04	0.21	0.08	0.2	0.06	0.28	0.18	0.06	0.42
1464	Rgs7	uc007dtj	1.1e-10	0.44	6.98	0.04	0.18	0.08	0.19	0.05	0.27	0.17	0.05	0.41
1465	Rgs7	uc007dtl	5.2e-13	0.34	4.75	0.03	0.12	0.06	0.16	0.04	0.2	0.12	0.03	0.34
1466	Rgs7	uc007dtk	6.7e-13	0.35	4.84	0.03	0.12	0.06	0.16	0.04	0.2	0.12	0.03	0.2
1467	Fh1	uc007dtn	4e-29	343.24	282.39	199.76	102.24	202.62	203.21	208.5	186.93	257.52	267.01	117.98
1468	Opn3	uc007dtq	4.5e-12	0.5	0.79	0.11	0.38	0.42	0.29	0.35	0.59	0.66	0.14	118.02
1469	Chml	uc007dtr	5.9e-12	1.51	1.8	0.59	2.4	1.13	1.14	0.88	1.42	1.87	0.75	0.84
1470	Pld5	uc007dtv	1.9e-17	0.17	0.34	0.62	0.6	2.39	0.6	1.54	1.92	0.03	1.05	0.86
1471	Pld5	uc007dtw	1.1e-17	0.15	0.31	0.56	0.55	2.18	0.55	1.41	1.75	0.03	0.96	0.05
1472	Pld5	uc007dtx	7e-17	0.16	0.31	0.54	0.55	2.17	0.53	1.39	1.78	0.03	0.94	0.05
1473	Cep170	uc007dub	6.6e-08	4.61	5.31	3.55	8.14	5.9	5.01	4.99	6.89	3.51	3.66	2.35
1474	Cep170	uc007duc	1.2e-09	4.65	5.11	3.62	8.35	5.95	5.22	5.43	6.64	3.82	3.81	4.48
1475	Cep170	uc007dud	1.4e-09	4.7	5.17	3.66	8.45	6.04	5.29	5.49	6.75	3.87	3.86	4.29
1476	Cep170	uc007duf	1.5e-09	4.06	4.46	3.16	7.26	5.2	4.56	4.72	5.82	3.33	3.32	3.55
1477	Sdccag8	uc007duh	9.6e-17	2.23	1.98	2.69	4.01	4.1	3.49	3.45	4.53	1.97	3.27	0.86
1478	Sdccag8	uc007dui	1.7e-18	2.12	2.07	2.73	4.07	4.18	3.44	3.46	4.56	2.03	3.46	1.78
1479	Sdccag8	uc011wxh	8.4e-24	2.62	2.42	3.32	5.24	5.22	4.4	4.65	5.87	2.29	4.05	2.07
1480	Cep170	uc007dug	9.1e-09	0.29	0.37	0.33	0.81	0.52	0.54	0.54	0.47	0.32	0.33	1.3
1481	Sdccag8	uc007duj	7.2e-26	2.79	2.56	3.55	5.56	5.85	4.87	4.95	6.34	2.23	4.14	1.81
1482	Zbtb18	uc007dul	7.9e-17	27.6	20.54	42.72	41.5	48.67	41.73	47.12	58.04	33.03	46.55	13.01
1483	Zbtb18	uc007dum	8.4e-17	28.63	21.41	44.2	43.11	50.52	43.33	48.89	60.39	34.28	48.29	23.87
1484	Zbtb18	uc007dun	7e-17	27.96	20.85	43.18	42.02	49.23	42.23	47.7	58.74	33.45	47.14	24.01
1485	Zbtb18	uc011wxi	1.5e-16	21.98	16.55	33.56	32.69	38.35	32.99	37.05	45.67	26.11	36.68	21.2
1486	Akt3	uc007duk	2.3e-16	7.25	8.91	3.54	8.76	4.94	6.62	4.66	4.95	5.52	4.15	2.38
1487	Adss	uc007dus	4.5e-08	11.05	10.96	8.39	11.61	13.51	14.19	11.16	16.16	9.61	11.39	12.06
1488	Adss	uc007dut	4.4e-08	10.27	9.7	7.88	11.03	13.64	13.45	11.02	14.97	9.31	11.53	18.47
1489	1700016C15Rik	uc007dur	2.7e-22	1.08	1.22	0.42	0.72	0.56	6.56	1.07	0.59	1.88	0.61	10.37
1490	Desi2	uc007dux	8.7e-16	14.58	15.84	19.26	20.48	32.99	22.56	24.06	42.97	17.41	27.98	7.44
1491	Adss	uc007duu	4e-07	3.5	3.17	3.02	4.48	5.38	5.08	4.05	5.15	3.66	4.76	9.49
1492	Desi2	uc011wxk	8.7e-16	14.34	15.57	18.93	20.13	32.43	22.17	23.66	42.24	17.11	27.51	9.36
1493	Hnrnpu	uc007dvb	2.3e-07	63.21	58.14	37.89	76.45	61.34	57.76	53.58	63.82	73.58	49.34	41.39
1494	Cox20	uc007duz	1.1e-11	72.99	68.56	36.41	31.83	69.76	41.86	46.98	87.31	49.13	62.24	38.14
1495	Efcab2	uc007dve	1.4e-13	9.58	10	8.85	18.24	15.39	11.24	12.44	14.77	14.06	12.67	32.9
1496	Hnrnpu	uc011wxl	7.5e-08	76.33	72.28	44.11	92.76	71.53	66.6	62.06	74.58	88.12	56.44	37.47
1497	Smyd3	uc007dvj	8.5e-18	1.49	2.55	2.04	1.21	1.59	1.59	1.52	1.75	0.96	1.69	38.28
1498	Tfb2m	uc011wxm	5.3e-09	6.13	6.07	5.36	3.88	6.63	6.54	5.85	9.89	5.17	5.92	3.07
1499	Cnst	uc007dvm	1.7e-12	1.69	1.81	1.66	2.02	0.97	1.53	1.44	0.54	2.22	1.01	1.13
1500	Cnst	uc007dvn	3.8e-13	5.26	6.12	5.38	6.55	3.03	4.77	4.52	1.67	6.67	3.07	3.15
1501	Cnst	uc007dvo	3.2e-21	22.44	33.78	18.27	24.5	19.25	20.04	18.76	17.27	25.33	17.03	11.69
1502	Sccpdh	uc007dvp	1.3e-08	35.34	40.76	25.12	38.86	41.32	42.87	30.22	56.07	35.48	37.69	28.01
1503	Tfb2m	uc007dvl	3.7e-10	4.64	4.43	4.17	2.84	4.7	4.66	4.34	6.81	3.9	4.31	20.63
1504	Ahctf1	uc011wxn	1.1e-17	5.74	6.6	5.81	8.94	11.72	9.69	8.12	12.56	6.1	9.57	5.11
1505	Cdc42bpa	uc007dvs	5.5e-12	5.98	6.87	3.94	9.18	8.28	5.45	6.11	8.21	7.05	6.55	26.52
1506	Cdc42bpa	uc007dvw	1.8e-18	7.55	9.59	5.39	11.26	7.94	5.89	6.91	7.68	7.47	7.17	4.86
1507	Cdc42bpa	uc007dvu	1.8e-18	7.59	9.63	5.42	11.31	7.98	5.91	6.94	7.71	7.5	7.2	6.08
1508	Ahctf1	uc007dvq	1.5e-15	7.57	9.11	7.35	12.32	13.96	11.37	10.6	14.46	7.9	11.39	7.72
1509	Adck3	uc007dvx	1.8e-22	514.24	386.89	211.18	169.17	111.44	136.11	199.86	82.91	528.97	181.13	176.28
1510	Adck3	uc007dvy	1.8e-22	501.49	377.26	206	165	108.7	132.74	194.93	80.87	515.85	176.67	339.01
1511	Adck3	uc007dvz	5.3e-16	393.49	237.53	192.12	121.55	62.86	103.88	143.84	37.45	393.77	114.29	310.89
1512	Adck3	uc011wxo	3.9e-19	81.58	57.07	43.22	18.6	6.11	14.57	22.22	3.35	74.86	9.58	174.83
1513	Psen2	uc007dwa	8.3e-10	4.97	6.59	4.3	4.2	2.19	4.25	2.76	1.79	2.57	2.86	33.86
1514	Psen2	uc007dwb	1.6e-10	4.65	5.73	4.28	3.95	1.96	3.98	2.69	1.6	2.38	2.58	4.77
1515	Psen2	uc007dwc	1.7e-10	4.44	5.48	4.09	3.77	1.87	3.8	2.57	1.53	2.28	2.46	4.4
1516	Psen2	uc007dwd	1.6e-10	4.46	5.5	4.11	3.79	1.88	3.81	2.58	1.53	2.29	2.47	4.3
1517	Psen2	uc007dwe	1.5e-09	1.83	1.93	1.76	1.7	0.74	1.66	1.19	0.56	0.95	0.96	2.97
1518	Cdc42bpa	uc007dvv	1e-11	1.36	1.45	0.79	1.85	1.57	1.08	1.33	1.42	1.51	1.28	1.29
1519	Itpkb	uc007dwg	2.2e-23	15.31	15.06	7.62	3.74	3.84	6.58	5.42	2.95	10.45	5.59	4.86
1520	Parp1	uc007dwi	3.5e-09	15.16	15.12	22.79	12.78	16.47	19.91	19.46	14.39	12.74	18.29	11.63
1521	Lin9	uc007dwj	8.8e-17	1.35	0.83	1.9	1.97	3.85	3.47	3.3	4.03	1.11	3.4	1.46
1522	Lin9	uc007dwk	9.3e-17	0.75	0.47	1.05	1.09	2.13	1.92	1.83	2.23	0.61	1.88	0.98
1523	Lin9	uc007dwl	3.8e-18	1.03	0.63	1.46	1.45	2.74	2.57	2.39	2.84	0.8	2.46	0.84
1524	Lin9	uc007dwm	2.6e-19	1.28	1.12	2.12	1.94	3.07	3.03	2.91	3.49	0.96	2.9	1.37
1525	Lin9	uc011wxp	2.6e-19	1.28	1.12	2.12	1.94	3.07	3.03	2.91	3.49	0.96	2.91	1.76
1526	Lin9	uc007dwn	1.1e-09	0.27	0.18	0.39	0.34	0.41	0.52	0.53	0.39	0.17	0.47	1.06
1527	6330403A02Rik	uc007dwh	1.7e-28	0.33	4.57	0.42	0.4	0.18	0.12	0.23	0.09	0.29	0.25	0.87
1528	Lin9	uc007dwo	1.4e-15	0.72	0.73	1.25	1.08	1.45	1.56	1.49	1.75	0.48	1.45	1.28
1529	Acbd3	uc007dwq	3.6e-10	9.12	9.35	6.29	12.41	8.82	8.76	8.48	9.5	9.62	7.21	12.49
1530	Sde2	uc007dwt	3e-15	6.58	7.51	4.76	8.21	5.05	5.95	5.28	5.43	7.27	4.64	10.37
1531	Pycr2	uc007dwv	1e-15	5.09	8.75	5.79	4.67	3.08	3.24	3.82	2.28	3.9	4.3	5.48
1532	Tmem63a	uc007dwx	6.8e-11	9.22	9.62	11.39	10.3	6.9	7.9	9.24	5.99	7.06	7.5	9.03
1533	H3f3a	uc007dws	2.2e-12	3.18	2.89	2.24	1.28	1.17	2.63	1.29	0.98	2.79	1.71	9.49
1534	Ephx1	uc007dwz	8.7e-27	26.74	37.25	11.08	25.61	10.2	16.31	13.12	7.92	28.78	10	20.15
1535	Tmem63a	uc007dwy	6.9e-11	9.3	9.71	11.48	10.38	6.96	7.97	9.32	6.04	7.12	7.57	27.35
1536	Ephx1	uc011wxq	8.8e-27	27.42	38.2	11.37	26.27	10.46	16.74	13.45	8.12	29.52	10.23	27.83
1537	Nvl	uc007dxb	7.4e-18	8.15	6.76	5.4	9.6	5.91	6.84	7.03	5.38	10.61	6.22	23.2
1538	Cnih4	uc007dxe	2.6e-09	17.37	18.4	16.23	16.15	20.96	17.04	18.36	25.76	14.81	21.14	8.66
1539	Nvl	uc007dxd	1.6e-11	6.51	5.23	4.43	9.07	5.86	5.96	6.74	5.44	9.92	5.56	11.18
1540	Wdr26	uc007dxf	1.3e-12	33.31	25.24	27.88	56.5	46.72	41.47	39.82	52.22	45.65	37.49	19.47
1541	Cnih4	uc011wxr	9.2e-10	16	17.04	15.31	14.8	19.21	15.93	17.08	23.95	13.58	19.68	24.78
1542	Wdr26	uc007dxg	2.3e-14	9.22	5.02	8.72	14.82	8.22	10	8.81	6.03	13.53	8.39	4.02
1543	Enah	uc007dxr	4.3e-18	8.1	5.55	3.64	16.95	5.67	4.81	8.11	6.18	18.89	5.84	10.37
1544	Enah	uc007dxs	1.4e-17	8.35	5.79	3.79	17.48	5.96	5.06	8.47	6.53	19.24	6.13	7.47
1545	Enah	uc007dxp	4.3e-18	8.09	5.55	3.63	16.94	5.66	4.81	8.1	6.17	18.87	5.84	7.46
1546	Enah	uc007dxq	4.4e-18	8.06	5.53	3.62	16.88	5.64	4.79	8.07	6.15	18.8	5.82	7.27
1547	Srp9	uc007dxu	1.2e-12	17.96	19.79	16.63	25.65	30.64	17.76	20.3	31.76	20.27	23.87	12.01
1548	Enah	uc007dxt	1.6e-15	3.51	1.58	1.62	5.47	2.96	2.33	3.64	2.71	6.35	3.27	13.24
1549	Degs1	uc007dxw	4.6e-21	24.64	26.6	12.95	25.08	17.15	16.52	15.78	17.75	25.44	14	21.53
1550	Srp9	uc007dxv	1.1e-12	18.89	20.81	17.47	26.94	32.23	18.66	21.34	33.38	21.3	25.1	34.15
1551	Degs1	uc007dxx	1.2e-14	17.29	15.9	9.54	18.01	12.51	11.93	12.03	11.91	19.28	10.34	10.3
1552	Trp53bp2	uc007dyc	3.5e-20	4.1	4.06	2.88	4.59	2.79	3.67	2.76	2.56	2.78	2.83	3.31
1553	Fbxo28	uc007dyb	6.8e-07	7.23	7.26	7.25	8.78	9.08	7.96	7.98	10.17	8.57	8.56	7.63
1554	Capn2	uc007dye	4e-23	38.56	40.85	25.86	54.39	29.31	32.51	32.38	29.99	34.08	27.14	21.74
1555	Trp53bp2	uc007dyd	2e-21	4.65	4.77	3.22	4.93	3.13	4.06	2.98	2.85	3.06	3.16	20.73
1556	Capn2	uc007dyf	4.9e-12	13.19	12.92	9.84	20.29	7.43	11.12	11.89	5.9	11.96	9.36	5.5
1557	Disp1	uc008ick	2.9e-19	1.89	2.27	1.06	1.42	0.57	1	0.75	0.47	0.73	0.55	0.97
1558	Disp1	uc008icm	1e-19	1.84	2.21	1.03	1.4	0.56	0.98	0.74	0.47	0.7	0.54	1.93
1559	Disp1	uc008icn	9.9e-20	1.84	2.22	1.03	1.4	0.56	0.98	0.74	0.46	0.71	0.54	1.91
1560	Disp1	uc008icl	1.1e-19	1.81	2.18	1.01	1.37	0.55	0.97	0.73	0.46	0.69	0.53	1.89
1561	Disp1	uc008ico	4.8e-11	2.08	2.16	1	1.55	0.72	1.21	0.83	0.61	0.72	0.72	1.91
1562	Brox	uc008icq	1.9e-10	6.67	8.14	4.91	8.82	5.81	6.5	5.71	7.18	6.83	5.92	5.37
1563	Brox	uc008icr	1.9e-10	6.9	8.43	5.08	9.12	6.01	6.73	5.92	7.42	7.07	6.13	8.97
1564	Tlr5	uc007dyl	7.3e-08	0.86	0.73	0.32	0.62	1.16	0.63	1	0.84	0.23	0.48	4.91
1565	Aida	uc008ict	8.7e-15	6.24	8.79	3.62	7.84	4.25	5.1	4.13	4.55	6.99	3.04	3.26
1566	Aida	uc012bom	1.8e-14	6.36	8.93	3.68	7.68	4.11	5.05	4.06	4.3	6.88	2.9	5.79
1567	Aida	uc008icu	5.7e-16	8.36	11.99	4.73	10.74	5.93	6.92	5.53	6.47	9.2	4.73	6.87
1568	Aida	uc029quz	7.8e-16	9.84	14.1	5.56	12.66	6.99	8.15	6.51	7.63	10.84	5.57	8.7
1569	Brox	uc008ics	2.1e-10	6.74	8.23	4.98	8.93	5.88	6.58	5.79	7.24	6.9	5.99	9.16
1570	Mia3	uc012bon	1.8e-10	21.88	26.25	30.5	22.52	26.81	25.63	25.76	30.42	19.62	26.37	18.48
1571	Mia3	uc008icw	1.2e-18	17.42	17.58	30.09	27.55	34.71	25.56	33.74	34.98	21.07	33.86	20.89
1572	Mia3	uc008icx	2.8e-16	19.38	18.25	30.74	34.89	45.5	30.44	42.5	56.01	23.61	38.34	20.24
1573	Mia3	uc008icy	5.3e-11	8.04	7.09	15.21	11.19	13.91	10.17	14.54	11.92	9.37	16.04	7.67
1574	Dusp10	uc007dym	6.6e-16	12.03	13.68	14.31	28.57	22.17	36.32	30.19	23.54	13.27	21.85	11.15
1575	Hlx	uc007dyn	3.7e-09	1.9	1	0.74	1.14	0.66	2.32	0.71	0.4	0.78	0.62	0.71
1576	2018-03-01	uc007dyo	2.8e-09	1.16	0.2	0.04	0.08	0.16	0.2	0.11	0.2	0.27	0.09	0.41
1577	2018-03-02	uc007dyq	8.7e-11	25.58	28.83	24.73	30.11	31.46	32.04	30.25	29.62	21.25	29.25	17.94
1578	2018-03-02	uc007dyr	5.9e-14	4.49	5.05	4.83	5.86	6.69	6.75	6.15	6.38	4.21	6.01	2.94
1579	C130074G19Rik	uc007dys	8.8e-10	10.32	14.01	9.01	7.08	8.24	8.51	7.92	7.01	8.8	10.23	6.75
1580	Mark1	uc007dyt	4.4e-31	3.38	2.56	0.85	1.62	0.84	0.83	0.83	0.7	3.88	0.74	5.13
1581	Rab3gap2	uc007dyu	2.2e-20	6.06	5.52	5	9.43	5.49	5.68	5.76	5.52	6.66	4.96	3.23
1582	Rab3gap2	uc007dyv	1.4e-19	6.3	5.85	5.15	9.48	5.54	5.74	5.84	5.62	6.79	5.01	3.56
1583	Rab3gap2	uc007dyw	8.6e-20	6.29	5.85	5.11	9.42	5.43	5.74	5.82	5.46	6.74	4.97	6.89
1584	Mark1	uc011wxy	4.4e-31	3.37	2.56	0.85	1.62	0.84	0.83	0.82	0.7	3.87	0.74	4.58
1585	Iars2	uc007dyy	1.9e-15	43.12	35.13	27.11	28.59	26.27	25.43	25.97	23.84	31.54	29.07	20.26
1586	Iars2	uc007dyz	1.5e-16	43.3	28.74	28.87	33.84	30.29	29	30.97	27.63	35.95	33.31	35.08
1587	Rab3gap2	uc007dyx	8.9e-19	8.03	7.98	6.32	10.6	5.27	5.96	6.35	4.89	7.39	4.96	21.44
1588	Iars2	uc007dza	2.4e-13	36.75	22	24.96	29.08	24.9	25.99	26.78	21.87	31.35	28.35	12.59
1589	Bpnt1	uc007dzc	7.4e-17	12.53	14.08	9.42	7.02	8.07	8.47	7.33	10.04	8.36	8.49	6.16
1590	Bpnt1	uc007dzd	1e-16	12.93	14.69	9.67	7.31	8.46	8.8	7.59	10.59	8.71	8.82	12.54
1591	Eprs	uc007dze	6.2e-29	60.08	24.54	69.23	74.14	87.17	60.6	88.74	91.46	88.6	87.7	20.9
1592	Eprs	uc007dzf	5.3e-29	39.21	16.53	44.14	48.54	54.58	37.68	56.06	57.59	55.91	55.25	24.26
1593	Eprs	uc007dzg	4.7e-29	76.12	37.95	81.09	81.12	95.78	65.87	95.55	101.31	98.39	99.56	31.93
1594	Iars2	uc007dzb	1.2e-13	11.91	6.49	8.24	10.66	9.28	9.16	9.83	8.37	11.12	10.05	26.12
1595	Eprs	uc007dzh	5.4e-22	40.11	14.39	47.58	46.28	47.44	40.43	56.06	45.13	56.96	52.88	9.67
1596	Lyplal1	uc007dzm	1.1e-13	1.22	1.89	0.51	0.82	1.08	0.84	0.81	1.19	1.21	0.67	1.03
1597	Tgfb2	uc007dzo	1.9e-21	5.15	5.5	6.41	15.36	8.59	4.12	7.04	9.21	4.28	7.31	2.33
1598	Tgfb2	uc007dzp	2e-21	5.07	5.4	6.3	15.09	8.44	4.06	6.92	9.05	4.21	7.18	4.62
1599	Esrrg	uc007eaa	2.3e-21	17.61	14.49	4.59	10.05	9.96	9.49	13.75	6.62	46.96	8.54	8.86
1600	Esrrg	uc007eab	2.4e-21	17.76	14.63	4.63	10.14	10.05	9.55	13.85	6.68	47.44	8.61	14.23
1601	Esrrg	uc011wyg	2.4e-21	17.36	14.3	4.53	9.91	9.83	9.34	13.54	6.53	46.37	8.42	7.04
1602	Kctd3	uc029qve	2.8e-11	5.44	6.8	5.29	7.19	5.27	4.99	4.67	5.2	5.42	5.51	3.83
1603	Kctd3	uc007eai	2.6e-14	4.4	4.99	4.53	5.95	4	4.04	4.1	3.88	4.47	4.19	6.69
1604	Kcnk2	uc007eak	2.2e-12	0.96	0.97	0.76	0.77	0.58	0.46	0.82	0.79	0.87	0.68	4.75
1605	Kcnk2	uc011wyj	2.2e-12	0.93	0.94	0.74	0.74	0.56	0.44	0.8	0.76	0.84	0.66	1.76
1606	Kcnk2	uc007eam	2.6e-12	0.98	1	0.77	0.79	0.6	0.47	0.85	0.81	0.89	0.7	1.79
1607	Kcnk2	uc007ean	5.9e-12	1.01	1.02	0.8	0.82	0.61	0.5	0.88	0.84	0.94	0.71	1.85
1608	Cenpf	uc007eao	1.9e-13	0.08	0.04	0.02	0.05	0.08	0.14	0.06	0.05	0.07	0.02	1.63
1609	Ptpn14	uc007eas	4.3e-12	3.01	1.36	1.57	1.1	1.64	1.46	1.93	0.97	3.15	1.65	0.75
1610	Ptpn14	uc007eat	4e-12	2.53	1.15	1.33	0.86	1.07	1.11	1.41	0.63	2.34	1.13	1.55
1611	Ptpn14	uc007eau	1.6e-29	6.08	3.44	2.57	2.11	2.91	2.69	3.27	2.44	4.96	2.97	3.27
1612	Ptpn14	uc007eav	1.6e-29	6.23	3.52	2.64	2.16	2.98	2.75	3.35	2.5	5.08	3.04	4.98
1613	Ptpn14	uc011wyk	3.1e-30	6.72	3.84	2.81	2.34	3.29	2.98	3.65	2.77	5.52	3.35	5.25
1614	Ptpn14	uc011wyl	7e-30	7.36	4.3	2.97	2.57	3.65	3.23	3.92	3.22	5.89	3.68	5.8
1615	Cenpf	uc007eaq	5.8e-07	0.01	0.01	0	0.02	0.04	0.09	0.01	0.02	0	0	3.2
1616	Smyd2	uc007eax	1.1e-36	28.3	5.84	66.01	61.38	139.14	83.52	93.17	87.14	33.2	187.69	11.53
1617	Smyd2	uc007eay	9.2e-36	33.89	7.57	82.57	79.53	183.95	106.6	124.41	115.99	41.28	246.33	24.4
1618	Smyd2	uc007eaz	8.5e-38	30.03	5.46	79.3	82.31	225.6	108.95	132.32	140.9	44.37	288.51	23.85
1619	Ptpn14	uc007eaw	7.9e-12	1.66	0.75	0.81	0.52	0.51	0.64	0.76	0.31	1.31	0.57	0.79
1620	Prox1	uc007ebc	8.4e-12	0.96	0.53	0.14	1	0.18	0.3	0.18	0.1	2.8	0.1	0.74
1621	Rps6kc1	uc007ebf	2.4e-09	5.35	5.96	9.16	5.23	5.48	4.24	5.65	5.47	4.91	5.15	2.9
1622	Rps6kc1	uc007ebi	3.7e-08	4.65	4.86	7.63	4.77	4.77	3.7	5.03	4.61	4.41	4.58	5.31
1623	Rps6kc1	uc007ebg	1.2e-07	1.93	2.06	3.44	1.98	1.98	1.56	2.23	1.88	1.97	1.89	3.38
1624	Angel2	uc007ebj	1.8e-12	15.4	16.02	14.86	19.16	19.69	16.74	17.22	19.02	17.07	18.89	7.99
1625	Angel2	uc007ebl	2.6e-15	5.41	4.97	5.61	7.89	9.71	7.17	7.57	8.93	7.01	8.12	10.25
1626	Angel2	uc007ebm	1.8e-12	14.75	15.35	14.24	18.36	18.86	16.04	16.5	18.23	16.35	18.1	9.92
1627	Angel2	uc007ebk	1.8e-12	14.94	15.55	14.43	18.59	19.1	16.25	16.71	18.46	16.56	18.33	15.33
1628	Angel2	uc007ebn	2.1e-12	15.18	16.05	14.57	19.12	19.63	16.51	16.96	19.07	16.82	18.73	15.66
1629	Angel2	uc007ebo	3.4e-12	15.2	16.12	14.61	19.14	19.35	16.48	16.9	18.84	16.79	18.5	15.98
1630	Angel2	uc007ebp	2.8e-15	5.43	4.99	5.64	7.93	9.75	7.2	7.6	8.97	7.04	8.15	10.35
1631	Rps6kc1	uc007ebh	1.9e-07	3.79	3.6	6.59	4.2	4.02	3.09	4.58	3.65	3.98	4.01	4.15
1632	Vash2	uc007ebr	6.3e-25	0.11	0.97	0.15	0.78	0.64	7.06	0.51	0.43	0.45	0.48	1.98
1633	Vash2	uc007ebs	4.4e-25	0.12	1	0.16	0.81	0.66	7.3	0.53	0.44	0.47	0.5	0.3
1634	Angel2	uc007ebq	3.1e-12	15.56	16.45	14.9	19.55	19.98	16.87	17.33	19.39	17.17	19.09	18.88
1635	Tatdn3	uc007ebx	9.3e-13	15.38	19.76	12.92	9.91	11.89	11.62	11.4	12.24	12.32	13.54	18.22
1636	Tatdn3	uc011wyp	5.8e-12	12.57	16.07	10.64	8.52	10.6	9.66	9.89	10.84	10.28	11.93	13.01
1637	Tatdn3	uc007ebz	4.4e-11	13.33	16.73	11.09	8.95	11.4	9.9	10.6	11.75	10.95	12.77	11.98
1638	Tatdn3	uc007eby	5.9e-12	12.73	16.27	10.78	8.63	10.74	9.78	10.02	10.98	10.41	12.08	6.08
1639	Fam71a	uc011wyr	1.5e-08	0	0	0	0.03	0	0	0	0	0	0	5.91
1640	Atf3	uc007ece	7.7e-18	6.32	8.51	2.14	108.49	2.99	2.11	11.03	3.3	21.75	2.87	2.59
1641	Atf3	uc011wys	6.2e-18	6.59	8.95	2.24	111.23	3.13	2.2	11.33	3.47	22.73	2.97	5.29
1642	Atf3	uc011wyt	7.7e-18	6.55	8.83	2.21	112.59	3.1	2.19	11.45	3.42	22.56	2.97	2.94
1643	Nenf	uc007ecg	1.2e-11	52.29	80.97	47.21	48.41	26.52	31.76	37.99	17.33	45.39	33.06	40.86
1644	Ppp2r5a	uc007eci	5.7e-10	33.52	37.79	24.39	27.52	28.68	30.6	27.15	36.23	30.29	28.14	55.11
1645	Dtl	uc007ecj	2.6e-18	0.26	0.17	0.08	6.09	0.18	1.14	0.22	0.21	0.24	0.14	16.53
1646	Dtl	uc007eck	4.6e-18	0.2	0.12	0.06	4.13	0.15	0.84	0.17	0.16	0.17	0.1	0.84
1647	Dtl	uc011wyu	4.4e-18	0.17	0.1	0.05	3.52	0.12	0.72	0.15	0.13	0.15	0.09	0.66
1648	Tmem206	uc007ech	1.7e-14	1.07	1.22	0.66	0.59	0.5	0.81	0.57	0.49	0.54	0.52	0.66
1649	Ints7	uc007eco	1.7e-15	2.99	3.5	1.99	2.16	1.68	2.64	2.24	1.9	2.78	1.71	2.08
1650	Ints7	uc007ecp	3.8e-18	4.68	5.19	3.16	3.28	2.29	3.91	3.29	2.41	4.47	2.34	4.39
1651	Ints7	uc007ecq	3.1e-18	4.81	5.32	3.22	3.37	2.36	4.02	3.37	2.49	4.59	2.42	5.97
1652	Ints7	uc007ecr	2.1e-18	4.75	5.33	3.17	3.32	2.32	3.95	3.31	2.48	4.5	2.37	6.07
1653	Lpgat1	uc007ecs	4.3e-17	22	19.6	9.11	10.54	12.63	11.99	13.17	14.08	23	12.75	10.71
1654	Lpgat1	uc007ecu	4.3e-17	21.93	19.55	9.08	10.51	12.59	11.95	13.13	14.04	22.93	12.71	15.29
1655	Lpgat1	uc007ect	4.3e-17	21.95	19.56	9.09	10.52	12.6	11.96	13.14	14.05	22.94	12.72	15.27
1656	Nek2	uc007ecx	1.6e-08	0.11	0.06	0.09	0.07	0.16	0.46	0.15	0.18	0.09	0.11	1.02
1657	Slc30a1	uc007edc	3.2e-12	4.36	4.44	2.19	4.2	3.08	3.59	3.25	3.86	3.63	3.07	4.17
1658	Traf5	uc029qvg	4.7e-16	2.17	3.95	1.11	1.87	0.81	3.12	0.92	0.84	1.25	1.22	2.96
1659	Traf5	uc007edg	1.7e-13	0.69	1.01	0.38	0.71	0.27	0.92	0.25	0.27	0.29	0.31	0.39
1660	Rcor3	uc007edh	3.5e-10	7.73	6.62	7.92	10.7	7.81	8.4	9.83	7.23	10.88	7.15	8.57
1661	Kcnh1	uc007edn	3.3e-14	0.01	0.12	0.01	0.03	0.02	0.03	0.01	0.01	0.02	0.01	2.29
1662	Kcnh1	uc007edo	3e-14	0.01	0.12	0.01	0.03	0.02	0.03	0.01	0.01	0.02	0.01	1.3
1663	Sertad4	uc011wyx	1.9e-13	2.96	3.24	1.73	6.42	2.37	1.67	2.06	1.95	2.02	1.2	2.55
1664	Sertad4	uc007eds	1.8e-13	2.73	2.99	1.6	5.92	2.19	1.54	1.91	1.8	1.86	1.11	2.28
1665	Irf6	uc007edx	1.2e-07	0.22	0.29	0.09	0.14	0.06	0.15	0.07	0.02	0.13	0.05	1.66
1666	Irf6	uc007edy	1.5e-30	0.82	1.39	0.21	0.48	0.28	0.52	0.19	0.26	0.52	0.31	11.93
1667	Irf6	uc007edz	1.9e-07	0.16	0.21	0.06	0.1	0.05	0.06	0.03	0.02	0.08	0.04	11.32
1668	A130010J15Rik	uc007eea	1.4e-12	3.61	2.59	2.46	2.5	3.33	2.62	2.76	4.01	3.7	3.03	3.02
1669	A130010J15Rik	uc011wza	5.9e-11	3.72	2.65	2.56	2.59	3.47	2.73	2.87	4.18	3.85	3.16	4.05
1670	A130010J15Rik	uc011wzb	6e-11	3.57	2.55	2.46	2.49	3.33	2.62	2.76	4.02	3.7	3.03	3.83
1671	A130010J15Rik	uc007eeb	6e-11	3.56	2.54	2.46	2.49	3.32	2.61	2.75	4.01	3.69	3.03	3.75
1672	Traf3ip3	uc007eec	3.3e-07	1.2	1.82	0.38	0.34	0.29	4.14	0.3	0.24	0.48	0.35	0.44
1673	Hsd11b1	uc007eef	2.4e-11	11.91	12.59	6.48	9.67	9.92	4.95	7.57	10.71	7.48	8.15	3.27
1674	Hsd11b1	uc007eeg	3.9e-11	12.06	12.63	6.46	9.65	9.74	5.01	7.55	10.54	7.69	8.03	5.84
1675	Hsd11b1	uc007eeh	3.8e-11	11.83	12.38	6.34	9.47	9.56	4.91	7.41	10.34	7.55	7.88	5.84
1676	G0s2	uc007eei	3.1e-17	42.5	31.02	12.08	3.18	4.51	3.3	4.72	3.65	24.63	9.94	12.84
1677	Lamb3	uc007eee	7.2e-30	2.75	1.79	1.04	0.37	0.69	0.57	0.95	0.73	2.3	0.9	13.21
1678	Lamb3	uc007eek	2.2e-20	0.64	0.31	0.08	0.07	0.09	0.15	0.13	0.05	1.07	0.07	7.42
1679	Camk1g	uc007eel	1.4e-09	0.42	0.09	0.08	0.1	0.04	0.04	0.13	0.02	1.12	0.02	0.02
1680	Plxna2	uc007een	2.3e-17	5.89	5.28	2.7	5.25	2.35	2.97	2.57	2.17	4.3	2.58	6.4
1681	Plxna2	uc007eeo	3.2e-13	7.45	6.89	3.34	6.75	3.46	3.85	3.47	3.37	5.51	3.63	6.45
1682	Cd34	uc007eep	2.8e-18	63.85	84.1	34.51	85.85	46.21	44.25	41.64	46.54	44.97	35.76	48.19
1683	Cd34	uc007eeq	4.2e-18	66.76	88.03	36.16	90.51	48.71	46.31	43.78	49.14	47.16	37.6	46.38
1684	Cr1l	uc007eeu	1.7e-10	16.73	12.52	12.69	11.37	19.49	15.82	15.4	21.31	14.48	18.64	6.5
1685	Cr1l	uc007eev	6.7e-10	16.1	12.12	12.12	11.13	18.35	15.12	14.67	20.11	13.97	17.67	12
1686	Cr2	uc007eey	6.6e-08	0.19	0.03	0	0	0.02	5.89	0.01	0.01	0.02	0.02	0.64
1687	Cr2	uc007eez	6.3e-08	0.19	0.03	0	0	0.02	5.78	0.01	0.01	0.02	0.02	0.01
1688	Cr2	uc007efa	6.3e-08	0.19	0.03	0	0	0.02	5.78	0.01	0.01	0.02	0.02	0.01
1689	Fam171a1	uc008idm	1.2e-23	4.27	5.46	1.77	4.7	2.2	2.17	2.12	2.16	3.76	1.93	10.7
1690	Fam171a1	uc008idn	1.2e-23	4.04	5.16	1.68	4.45	2.08	2.06	2	2.04	3.56	1.83	4.22
1691	Fam171a1	uc008ido	1.9e-23	4.14	5.29	1.72	4.54	2.13	2.11	2.05	2.1	3.63	1.87	4.14
1692	Nmt2	uc008idp	1.5e-11	0.58	0.84	0.42	1.43	0.99	0.87	0.7	1.14	0.32	0.64	4.21
1693	Nmt2	uc008idq	1.6e-19	4.44	6.92	4.7	12.37	7.98	6.78	7.82	10.08	3.08	5	3.42
1694	Nmt2	uc008idr	1.6e-19	4.55	7.09	4.83	12.67	8.17	6.96	8.02	10.33	3.16	5.14	6.34
1695	Rpp38	uc008ids	2.3e-07	4.53	6.45	4.65	4.72	6.12	5.93	5.77	6.5	5.15	4.82	4.22
1696	Nmt2	uc012boq	1.6e-19	4.51	7.04	4.78	12.58	8.11	6.9	7.96	10.24	3.13	5.09	7.39
1697	Acbd7	uc008idt	1.1e-10	1.27	2.11	0.99	0.25	0.9	1.28	0.84	1	0.8	0.58	0.85
1698	Dclre1c	uc008idy	4.1e-10	0.88	0.87	0.38	1.08	0.55	0.96	0.57	0.55	0.71	0.48	1.32
1699	Dclre1c	uc008idz	2.4e-07	1.87	2.22	1.01	2.12	1.64	2.09	1.47	1.86	1.47	1.23	2.62
1700	Dclre1c	uc012bos	2.7e-07	0.9	0.99	0.48	1.01	0.75	1.18	0.68	0.8	0.77	0.58	1.9
1701	Dclre1c	uc008ieb	7.2e-08	1.03	1.22	0.58	1.19	0.83	1.32	0.84	0.91	0.86	0.67	1.33
1702	Dclre1c	uc008iea	1.7e-07	1.01	1.18	0.58	1.17	0.82	1.3	0.81	0.89	0.86	0.68	1.44
1703	Hspa14	uc008ief	3.4e-14	12.67	13.06	8.55	13.21	8.85	9.9	8.63	9.26	10.97	9.72	7.11
1704	Hspa14	uc008ieg	2.7e-14	9.76	10.16	6.5	10.01	6.86	7.62	6.6	7.18	8.33	7.35	11.97
1705	Hspa14	uc008ieh	1.5e-10	0.69	0.83	0.5	1	0.61	0.61	0.5	0.65	0.73	0.62	5.67
1706	Cdnf	uc008iej	3.6e-21	24.41	24.09	33.7	21.27	37.52	28.55	34.05	41.09	25.97	38.16	8.76
1707	Fam107b	uc008iek	1.9e-09	4.93	4.33	1.62	4.16	2.31	7.35	2.29	2.4	3.07	1.89	5.88
1708	Hspa14	uc008iei	1.2e-10	0.7	0.84	0.5	1.01	0.62	0.62	0.5	0.65	0.73	0.63	6.32
1709	Frmd4a	uc008ieo	5.2e-17	2.22	2.99	1.2	2.28	1.27	1.38	1.23	1.19	1.8	1.14	1.06
1710	Frmd4a	uc008ies	5.4e-17	2.08	2.81	1.12	2.14	1.19	1.29	1.15	1.11	1.69	1.06	1.05
1711	Frmd4a	uc008iet	2.8e-07	0.41	0.46	0.2	0.48	0.16	0.19	0.28	0.15	0.38	0.16	1.13
1712	Frmd4a	uc008ieu	7.6e-11	0.95	1.19	0.47	1.25	0.38	0.49	0.65	0.32	0.94	0.41	0.49
1713	Frmd4a	uc008iev	4.2e-17	2.39	3.16	1.27	2.4	1.33	1.43	1.3	1.27	1.95	1.22	1.21
1714	Bend7	uc008iey	5e-09	0.65	0.73	0.55	1.36	0.52	0.81	0.73	0.46	0.98	0.65	1.38
1715	Bend7	uc008ifa	5.1e-11	1.38	1.42	0.96	1.84	0.77	1.38	1.02	0.83	1.51	0.98	0.73
1716	Bend7	uc008iez	5.4e-11	1.38	1.41	0.96	1.84	0.77	1.38	1.02	0.83	1.51	0.98	0.99
1717	Bend7	uc012bou	5e-10	1.65	1.7	1.16	2.09	0.92	1.59	1.18	0.98	1.75	1.16	1.09
1718	Sephs1	uc008ifb	5.4e-19	4.97	5.11	6.77	7.56	8.21	7.43	7.14	8.76	4.99	7.69	3.76
1719	Sephs1	uc008ifc	5.4e-19	4.93	5.07	6.73	7.51	8.16	7.38	7.09	8.71	4.96	7.64	6.3
1720	Phyh	uc008ifd	1.6e-29	530.26	594.68	197.56	104.26	245.42	257.78	260.91	254.25	366.53	277.02	167
1721	Prpf18	uc008iex	2.8e-08	21.65	20.63	20.76	31.32	25.34	21.98	22.8	27.53	23.73	23.31	10.34
1722	Optn	uc008ifl	7.2e-22	31.17	33.31	33.96	51.34	34.49	18.78	41.26	28.73	53.03	38.15	9.36
1723	Optn	uc008ifm	4e-24	44.03	43.56	48.11	75.2	47.21	27.14	59.2	37.68	76.6	54.09	11.79
1724	Optn	uc008ifn	1.1e-22	44.02	41.04	48.64	75.92	44.23	27.11	58.66	33.39	77.01	51.86	12.16
1725	Camk1d	uc008ifp	3e-17	0.8	1.06	0.74	2.24	0.87	1.25	0.89	1.1	0.45	0.68	5.17
1726	Camk1d	uc008ifq	3.1e-17	0.81	1.06	0.74	2.26	0.87	1.26	0.9	1.11	0.45	0.69	5.04
1727	Camk1d	uc012box	2.9e-17	0.82	1.08	0.75	2.27	0.88	1.27	0.9	1.12	0.46	0.69	5.08
1728	Ccdc3	uc008ifo	2.8e-15	1.92	6.28	2.51	17.29	7.64	6.91	7.55	5.85	2.53	3.48	8.33
1729	Camk1d	uc008ifr	2.6e-08	0.17	0.13	0.19	0.4	0.13	0.29	0.19	0.14	0.07	0.15	6.03
1730	Cdc123	uc008ift	4.2e-08	31.95	39.76	34.39	40.83	40.08	32.5	37.22	42.33	36.42	38.46	18.9
1731	Cdc123	uc008ifu	5.3e-09	24.82	28.54	25.99	32.62	29.4	26.27	30.86	26.72	30.51	31.6	15.91
1732	Sec61a2	uc008ifx	3.8e-21	20.18	29.63	27.65	15.27	30.62	25.17	27.83	35.88	16.8	32.57	9.75
1733	Sec61a2	uc012boy	1.7e-20	20.3	29.88	27.4	15.06	30.7	24.46	27.35	36.58	16.57	32.73	18.43
1734	Sec61a2	uc008ify	8.9e-16	6	7.54	8.57	5.3	12.63	8.63	10.03	14.3	5.86	11.75	11.67
1735	Sec61a2	uc008ifz	7.4e-13	10.42	12.13	14.93	9.3	21.63	14.71	18.13	25.63	9.61	20.35	6.72
1736	Dhtkd1	uc008iga	2.9e-25	2.29	2.5	1.2	1.02	0.83	1.15	1.18	0.82	1.52	0.96	5.12
1737	Upf2	uc008igc	2.5e-13	12.93	10.95	12.69	14.28	19.41	14.27	15.78	22.76	14.92	18.28	8.35
1738	Dhtkd1	uc008igb	7.2e-17	1.11	1.18	0.53	0.42	0.29	0.49	0.51	0.24	0.72	0.38	5.37
1739	Proser2	uc008igf	8e-21	0.16	0.64	0.17	0.18	0.17	0.11	0.14	0.11	0.07	0.09	1.42
1740	Proser2	uc008ige	8e-21	0.17	0.66	0.18	0.19	0.17	0.12	0.14	0.11	0.07	0.09	2.13
1741	Upf2	uc008igd	8.6e-11	15.96	14.69	14.89	17.18	23.69	16.26	18.11	28.46	17.27	21.79	7.81
1742	Usp6nl	uc008igk	2.2e-28	1.64	3.19	1.41	7.49	1.65	1.95	1.86	1.37	1.69	1.32	2.11
1743	Usp6nl	uc008igl	3.2e-28	1.69	3.3	1.45	7.7	1.68	2.01	1.9	1.41	1.75	1.35	4.29
1744	Echdc3	uc008igi	1.1e-22	7.81	1.26	2.48	1.12	2.72	1.58	2.38	2.49	2.59	3.12	5.52
1745	Celf2	uc008ign	1.7e-07	8.59	10.38	10.08	9.88	12.53	12.58	10.15	16.63	6.85	9.16	7.27
1746	Celf2	uc008igq	4.8e-08	10.58	12.12	12.7	12.15	15.4	15.5	12.77	20.14	8.62	11.38	8.68
1747	Celf2	uc008igr	3.8e-08	10.3	11.78	12.41	11.81	15	15.1	12.42	19.56	8.39	11.09	9.36
1748	Celf2	uc012bpa	4.3e-08	9.11	10.52	10.91	10.48	13.23	13.38	10.93	17.2	7.37	9.75	8.71
1749	Celf2	uc008igo	4.9e-08	8.95	10.43	10.65	10.31	12.97	13.15	10.72	16.9	7.22	9.52	8.12
1750	Celf2	uc008igt	3.8e-08	10.18	11.63	12.25	11.66	14.81	14.91	12.26	19.31	8.28	10.95	8.58
1751	Celf2	uc008igs	3.8e-08	10.19	11.65	12.27	11.68	14.83	14.93	12.28	19.34	8.3	10.97	9.12
1752	Celf2	uc008igu	4.8e-08	10.28	11.77	12.33	11.8	14.95	15.05	12.4	19.56	8.37	11.05	9.18
1753	Celf2	uc008igv	3.8e-08	10.21	11.67	12.29	11.7	14.85	14.96	12.3	19.38	8.31	10.99	9.18
1754	Celf2	uc008igp	3.9e-08	8.83	10.26	10.53	10.14	12.78	12.96	10.55	16.61	7.12	9.4	8.53
1755	Celf2	uc008igw	4.1e-09	14.28	11.18	19.92	16.57	19.9	20.91	18.87	21.76	12.29	14.65	9.43
1756	Celf2	uc008igx	8.4e-12	0.8	0.55	1.06	0.94	1.11	1.26	1.07	1.07	0.76	0.87	5.75
1757	Taf3	uc008ihk	2.1e-13	3.29	3.06	2.83	2.34	2.16	2.72	2.11	2.34	2.91	1.95	1.31
1758	Taf3	uc008ihl	1e-08	3.75	3.3	3.45	3.59	3.21	3.58	3.35	3.26	4	3.04	2.71
1759	Atp5c1	uc008ihn	2.6e-17	506.06	481.16	324.98	234.91	408.33	335.93	362.19	385.69	467.37	480.06	179.56
1760	Kin	uc008iho	7.1e-12	5.41	6.42	3.14	7.72	4.41	4.27	4.28	4.26	5.34	3.91	2.79
1761	Kin	uc008ihp	4.7e-11	8.77	10.15	5.18	12.54	7.52	7.08	7.29	7.37	9	6.68	7.32
1762	Atp5c1	uc008ihm	2.7e-17	781.13	742.85	501.35	362.54	630.54	518.69	559.16	595.66	721.7	741.03	279.48
1763	Kin	uc012bpd	1.8e-11	8.17	9.57	4.82	11.81	7	6.59	6.78	6.85	8.36	6.23	279.21
1764	Itih2	uc008ihq	4e-12	0.29	0.85	0.26	1.9	0.46	0.31	0.43	0.27	0.2	0.31	4.41
1765	Itih5	uc008ihr	3.4e-11	6.4	13.61	5.48	11.1	9.2	9.8	7.18	12.73	5.05	6.15	3.11
1766	Prkcq	uc008iia	3e-21	20.23	21.54	19.78	35.66	16.28	29.48	22.23	14.4	19.7	18.01	9.56
1767	Prkcq	uc008iib	5.7e-19	35.88	39.19	34.04	61.2	32.01	51.94	38.77	30.5	34.57	33.47	26.15
1768	Prkcq	uc008iic	5.1e-17	49.28	64.48	43.62	74.86	46.02	67.56	49.67	45.83	44.92	46.2	22.49
1769	Pfkfb3	uc008iim	1e-40	5.35	8.28	93.13	26.07	124.7	138.39	88.57	141.02	4.13	85.32	4.69
1770	Pfkfb3	uc008iik	1.2e-40	5.14	7.94	89.87	24.97	118.69	133	84.9	133.88	3.95	81.33	9.23
1771	Pfkfb3	uc008iil	1e-40	5.23	8.1	91.68	25.46	121.26	135.72	86.65	136.75	4.03	83.15	9.17
1772	Pfkfb3	uc008iif	1.2e-40	5.19	8.02	90.59	25.17	119.85	134.2	85.71	135.15	3.99	82.19	9.22
1773	Pfkfb3	uc008iij	1.2e-40	5.17	7.99	90.29	25.07	119.45	133.65	85.37	134.65	3.97	81.89	9.16
1774	Pfkfb3	uc008iig	1e-40	5.2	8.05	91.24	25.35	120.47	135.03	86.16	135.94	4.01	82.56	9.17
1775	Pfkfb3	uc008iie	1e-40	5.26	8.13	92	25.56	121.68	136.28	87	137.28	4.05	83.46	9.25
1776	Pfkfb3	uc008iih	9.5e-41	5.61	8.7	97.49	27.35	130.89	145.9	93.22	147.8	4.33	89.65	9.59
1777	Pfkfb3	uc008iii	2.8e-39	4.51	6.88	92.69	27.25	103.45	137.28	90.66	106.31	3.74	72.24	9.42
1778	Pfkfb3	uc008iin	1e-37	3	4.54	65.34	18.34	64.56	97.21	61.93	63.75	2.68	47.19	7.48
1779	Il2ra	uc008iiq	1.2e-10	0.66	0.53	0.54	0.21	0.48	1.09	0.38	0.59	0.42	0.7	0.31
1780	Il15ra	uc008iit	2.6e-26	20.63	23.8	14.69	9.15	9.77	13.35	10.82	9.49	14.56	11.9	8.97
1781	Il15ra	uc008iis	2.2e-27	19.62	22.7	13.96	8.72	9.3	12.6	10.28	9.03	13.8	11.39	16.95
1782	Il15ra	uc008iir	6.7e-27	20.06	22.95	14.22	8.8	9.43	12.97	10.44	9.15	14.11	11.57	16.68
1783	Il15ra	uc008iiu	8.7e-26	19.97	23.01	13.93	9.11	9.81	12.81	10.62	9.54	14.29	11.99	16.88
1784	Il15ra	uc008iiv	2e-25	19.71	23.07	13.93	9.21	9.89	12.55	10.58	9.63	14.24	12.05	17.07
1785	Il15ra	uc008iiw	4.5e-19	6.05	7.28	4.25	3	2.72	4.48	3.39	2.9	4.57	3.69	10.75
1786	Il15ra	uc008iiy	8.8e-26	19.69	22.77	14.01	8.64	9.44	12.58	10.19	9.27	13.84	11.45	10.51
1787	Il15ra	uc008iiz	4.3e-25	19.5	22.76	13.65	8.75	9.56	12.62	10.26	9.39	13.9	11.61	16.66
1788	Il15ra	uc008ija	1.3e-24	19.2	22.81	13.63	8.82	9.64	12.34	10.2	9.47	13.82	11.65	16.73
1789	Il15ra	uc008iix	1.9e-26	19.66	22.73	13.98	8.47	9.2	12.81	10.12	9	13.76	11.22	16.64
1790	Il15ra	uc012bqt	1.6e-26	22	25.41	15.59	9.49	10.3	14.32	11.35	10.07	15.41	12.55	17.44
1791	Rbm17	uc008iio	1.3e-08	17.16	19.36	13.05	19.79	20.45	15.18	16.5	21.01	17.4	17.66	18.9
1792	Fbxo18	uc008ijc	2.1e-29	19.25	18.28	9.85	8.77	12.49	9.36	10.03	13.17	12.18	10.55	19.19
1793	Fbxo18	uc008ijd	2.1e-29	18.98	18.02	9.71	8.65	12.31	9.23	9.89	12.99	12.01	10.4	18.85
1794	Fbxo18	uc008ije	7.6e-27	13.03	12.16	6.74	5.99	8.58	6.39	6.9	9.14	8.58	7.3	15.48
1795	Il15ra	uc008ijb	1.2e-22	20.28	24.38	14.44	9.23	9.94	13.04	10.68	10.19	14.1	11.82	14.89
1796	Ankrd16	uc008ijg	1.2e-07	1.73	2.34	2.37	2.6	1.77	1.71	1.96	1.6	1.5	1.88	9.8
1797	Ankrd16	uc012bqv	2e-13	4.46	5.79	6.08	6.21	4.69	4.21	4.67	4.87	3.43	5.24	4.45
1798	Ankrd16	uc008ijh	2.5e-13	4.38	5.67	5.94	6.1	4.54	4.01	4.55	4.72	3.3	5.13	6.81
1799	Ankrd16	uc008iji	1.9e-14	7.39	9.7	8.79	10.29	7.63	6.64	7.06	8	5.61	8.4	9.56
1800	Fbxo18	uc008ijf	4e-13	11.18	9.62	7.33	5.09	5.53	5.36	5.9	5.17	6.86	5.59	12.03
1801	Itga8	uc008ijk	1.7e-18	0.71	4.9	0.71	1.95	0.98	0.72	0.59	0.72	1.15	0.62	6.26
1802	Itga8	uc012bqw	1.7e-18	0.71	4.89	0.7	1.95	0.98	0.72	0.59	0.71	1.15	0.62	0.79
1803	Ankrd16	uc008ijj	4.4e-14	7.63	10.3	9.92	10.34	8.37	6.72	7.55	8.71	5.94	9.14	6.93
1804	Fam188a	uc008ijn	1.6e-07	5	7.04	4.86	8.04	7.39	5.2	5.53	8.29	5.68	5.69	4.86
1805	Fam188a	uc008ijo	1.6e-07	5.01	7.05	4.86	8.05	7.4	5.2	5.53	8.3	5.68	5.69	9.55
1806	Fam188a	uc008ijp	1.5e-07	5.1	7.2	4.97	8.22	7.56	5.29	5.65	8.47	5.8	5.8	9.65
1807	Fam188a	uc008ijq	7.8e-07	5.41	7.63	5.28	8.58	7.81	5.65	5.93	8.85	6.24	6.06	10.02
1808	E030013I19Rik	uc008ijm	4.2e-10	0.12	1.02	0.07	0.07	0.1	0.03	0.05	0.1	0.11	0.07	5.19
1809	Pter	uc008ijt	2.3e-17	7.6	4.54	7.53	7	9.97	7.27	11.22	10.03	10.81	11.23	3.25
1810	Pter	uc008iju	2.6e-21	6.05	3.86	5.77	4.93	10.04	6.3	9.06	12.26	7.91	10.01	5.92
1811	C1ql3	uc008ijv	9e-16	0.29	1.16	0.25	2.46	0.92	0.53	0.67	0.64	0.32	0.2	1.43
1812	Rsu1	uc008ijw	1.1e-07	23.87	28.64	21.61	20.39	24.83	21.46	20.07	22.12	20.64	24.65	21.22
1813	Cubn	uc008ijz	2.6e-08	0.02	0.07	0.01	0.09	0.03	0.05	0.03	0.01	0.02	0.02	4.99
1814	Pter	uc012bqx	2.7e-21	6.1	3.91	5.8	4.97	10.13	6.35	9.12	12.32	8.01	10.08	2.71
1815	Trdmt1	uc008ika	9.7e-07	4.63	4.72	2.81	3.59	3.48	3.63	3.28	3.7	5.12	3.15	4.72
1816	St8sia6	uc008ikc	1.6e-08	0.77	1.81	0.24	0.3	0.42	0.78	0.36	0.45	0.59	0.32	2.25
1817	Ptpla	uc012bqy	9.9e-32	11.77	5.54	12.98	10.3	24.82	9.15	14.2	29.83	8.15	21.71	2.64
1818	Ptpla	uc008ike	6.6e-32	25.93	12.16	28.31	23.2	56.62	20.41	32.34	68.67	17.99	49.33	5.47
1819	Ptpla	uc008ikd	6.6e-32	32.37	15	36.41	27.46	68.5	28.75	41.69	83.16	22.82	60.47	12.17
1820	Vim	uc008ikb	1.4e-22	106.81	129.07	43.87	263.54	65.93	65.1	61.01	54.13	76.25	38.64	77.96
1821	Stam	uc008iki	3.9e-08	7.5	6.58	5.27	10.45	10.72	6.85	8.19	10.72	8.6	7.86	6.63
1822	Tmem236	uc008ikj	9.4e-08	0.27	0.12	0.09	0.22	0.2	0.14	0.14	0.28	0.21	0.08	3.2
1823	Mrc1	uc008ikk	2.9e-10	5.33	4.99	2.57	12.23	6.89	4.53	4.14	8.76	3.09	2.95	3.47
1824	Nsun6	uc008ikt	7.4e-08	1.88	2	0.98	1.62	1.43	1.68	1.38	1.56	1.57	1.18	0.99
1825	Nsun6	uc008ikv	6.6e-08	1.81	1.93	0.95	1.57	1.37	1.62	1.33	1.5	1.51	1.14	1.94
1826	Nsun6	uc008iku	1.5e-07	1.88	2.01	0.95	1.62	1.46	1.64	1.33	1.61	1.57	1.22	1.93
1827	Cacnb2	uc008iks	5.9e-09	0.43	0.37	0.28	0.46	0.22	0.19	0.22	0.2	0.33	0.22	1.06
1828	Arl5b	uc008ikx	1.4e-07	2.92	2.09	2.26	3.17	5.2	3.42	3.15	5.76	3.79	4.39	1.47
1829	Plxdc2	uc008ikz	7.2e-20	11.16	8.2	5.13	18.33	7.75	6.55	7.15	7.96	5.69	5.48	8.21
1830	Mllt10	uc008ilm	4.3e-16	6.28	6.71	5.62	9.39	5.33	6.1	5.33	5.22	6.53	5.36	3.58
1831	Mllt10	uc008iln	7.6e-09	2.96	2.93	2.99	5.56	3.61	3.51	3.54	3.33	4.17	3.56	4.9
1832	Mllt10	uc008ilq	4.2e-16	6.1	6.51	5.46	9.12	5.18	5.92	5.18	5.07	6.35	5.21	4.59
1833	Mllt10	uc008ilp	4.3e-16	6.05	6.45	5.41	9.04	5.14	5.87	5.14	5.02	6.28	5.17	6.81
1834	Mllt10	uc008ils	4.2e-16	6.14	6.55	5.48	9.17	5.21	5.95	5.21	5.1	6.38	5.24	6.82
1835	Skida1	uc008ill	6.4e-12	0.32	0.52	0.12	0.17	0.14	0.16	0.12	0.12	0.22	0.11	3.69
1836	Dnajc1	uc008ilt	1e-09	3.01	2.35	1.81	2.74	2.49	2.88	2.61	2.58	2.99	1.89	1.71
1837	Dnajc1	uc008ilu	5.8e-07	6.58	5.74	4.47	5.25	5.36	6.09	5.56	5.66	6.15	4.91	4.44
1838	Dnajc1	uc008ilv	5.9e-07	6.63	5.84	4.52	5.23	5.41	6.11	5.6	5.63	6.22	5.01	6.04
1839	Dnajc1	uc012brd	1e-07	6.7	5.92	4.55	5.07	5.24	6.07	5.48	5.52	6.05	4.89	6.06
1840	Mllt10	uc008ilr	4.2e-16	5.87	6.26	5.26	8.77	4.99	5.7	4.99	4.87	6.11	5.02	4.27
1841	Commd3	uc008ilx	3.4e-10	93.27	89.72	69.35	72.7	118.49	88.39	87.23	131.78	96.72	100.63	44.57
1842	Pip4k2a	uc008imb	9e-07	4.25	4.57	2.14	5.75	3.28	5.63	2.67	3.46	2.39	2.24	2.06
1843	Msrb2	uc008imf	2.2e-35	39.34	30.3	17.71	3.58	17.1	17.56	18.22	16.39	19.77	25.65	14.74
1844	Otud1	uc008imj	2.3e-12	14.76	7.38	5.92	79.1	13.39	4.7	11.43	23.73	30.82	10.63	4.29
1845	Etl4	uc008imk	2.4e-17	8.6	5.83	5.39	9.02	3.52	7.38	5.91	2.36	8.46	3.75	7.84
1846	Etl4	uc008imm	3.9e-25	36.57	27.63	17.74	35.16	18.16	27.31	22.78	16.81	31.93	16.42	17.83
1847	Etl4	uc008imo	4.2e-24	32.24	25.43	15.85	28.31	14.03	22.9	18.38	13.83	25.95	13.05	33.38
1848	Etl4	uc008imn	4.2e-24	32.06	25.29	15.77	28.16	13.95	22.77	18.28	13.75	25.8	12.98	31.09
1849	Etl4	uc008imp	9.9e-15	1.67	1.33	1.28	1.02	0.46	0.98	0.86	0.31	1.25	0.62	16.07
1850	Etl4	uc012brk	6e-24	33.03	26.1	16.28	28.9	14.42	23.52	18.84	14.22	26.52	13.39	16.55
1851	Etl4	uc008imq	4e-25	36.66	27.68	17.79	35.28	18.21	27.38	22.84	16.86	31.99	16.47	33.79
1852	Etl4	uc008imr	9.5e-17	11.5	7.49	6.89	13.03	5.04	10.48	8.34	3.38	11.93	5.18	22.72
1853	Etl4	uc008ims	1.8e-19	22.39	14.56	13.06	25.32	9.09	18.68	15.66	6.36	21.85	9.71	15.35
1854	Etl4	uc008imt	1.6e-23	18.53	12.83	9.93	19.42	7.22	14.42	12.08	5.16	17.14	7.61	18.78
1855	Etl4	uc008imu	4.7e-17	21.81	14.09	13.11	24.5	9.04	19.36	15.39	5.93	22.07	9.32	17.94
1856	Arhgap21	uc008imx	1.3e-22	7.17	6.83	4.83	10.41	5.25	6	5.76	5.4	5.54	5.02	3.49
1857	Arhgap21	uc008imz	1.5e-22	7.03	6.56	4.73	10.38	5.16	5.94	5.75	5.3	5.49	5	6.66
1858	Etl4	uc008imw	2.1e-13	49.38	43.41	20.61	38.9	23.45	32.4	25	26.66	35.95	19.7	28.1
1859	Arhgap21	uc012brl	1.4e-22	7	6.54	4.71	10.34	5.14	5.92	5.72	5.28	5.46	4.98	28.09
1860	Thnsl1	uc008inc	9.9e-11	2.96	2.67	2.14	2.58	4.25	2.54	3.65	4.84	2.33	3.02	1.88
1861	Thnsl1	uc008inb	1.9e-11	3.41	2.79	2.69	3.64	5.34	3.23	4.78	5.87	2.85	3.8	2.46
1862	Thnsl1	uc008ind	5.7e-11	2.87	2.58	2.07	2.5	4.12	2.48	3.55	4.68	2.25	2.93	2.42
1863	Apbb1ip	uc008inl	9.7e-08	0.64	0.29	0.18	1.03	0.34	1	0.28	0.27	0.21	0.17	0.26
1864	Apbb1ip	uc008inm	2.3e-08	2.04	1.06	0.58	3.81	1.17	3.48	1.08	0.97	0.81	0.61	1.21
1865	Apbb1ip	uc008inn	7.7e-09	0.76	0.45	0.23	1.48	0.51	1.31	0.42	0.41	0.3	0.22	1.31
1866	Apbb1ip	uc008ino	8.6e-10	2.3	1.8	0.78	4.7	1.45	3.95	1.34	1.42	0.95	0.66	1.78
1867	Pdss1	uc008inp	1.3e-08	6.16	4.76	2.93	3.09	4.88	3.87	3.89	5	6.2	5.01	3.77
1868	Enkur	uc008ina	3.3e-15	0.74	1.59	0.33	5.42	0.94	0.71	1.04	0.49	1.07	0.35	2.91
1869	Abi1	uc008inr	4.3e-13	12.63	15.14	7.87	26.95	11.29	12.56	9.56	13.88	11.79	8.51	12.11
1870	Abi1	uc008ins	1.8e-13	11.65	13.71	7.3	24.54	10.26	11.5	8.91	12.28	10.91	7.86	21.78
1871	Abi1	uc008inv	2.6e-13	11.88	13.99	7.42	24.83	10.47	11.73	9.07	12.6	11.11	8.01	20.67
1872	Abi1	uc008inw	3.9e-13	12.11	14.31	7.5	25.68	10.83	12.08	9.3	13.07	11.29	8.18	21.24
1873	Abi1	uc008inu	1.8e-13	11.7	13.77	7.34	24.66	10.31	11.56	8.96	12.35	10.96	7.9	21.05
1874	Pdss1	uc008inq	3.4e-11	12.97	11.12	6.19	6.1	9.01	8.05	7.79	8.88	12.42	9.92	15.29
1875	Abi1	uc008int	1.8e-13	11.69	13.76	7.34	24.63	10.3	11.55	8.95	12.34	10.95	7.89	17.17
1876	Mastl	uc008iob	9.2e-10	0.11	0.1	0.19	0.18	0.31	0.21	0.15	0.34	0.1	0.16	10.58
1877	Yme1l1	uc008iod	4.9e-07	9.52	8.14	8.59	14.13	13.34	11.77	12.48	16.32	10.76	10.77	11.36
1878	Spopl	uc008ioi	5.9e-13	4.61	3.46	3.98	4.23	8.9	5.92	5.25	10.49	5.23	6.73	2.23
1879	Spopl	uc008ioj	6.1e-13	4.81	3.62	4.16	4.41	9.32	6.18	5.48	10.97	5.47	7.03	4.21
1880	Spopl	uc008ioh	8.9e-13	4.74	3.56	4.08	4.37	9.15	6.09	5.37	10.81	5.38	6.91	4.26
1881	Hnmt	uc008iok	5.7e-18	6.58	5.72	3.39	1.05	5.46	5.89	2.57	8.96	3.53	4.64	4.5
1882	Il1f8	uc008ion	2.6e-26	0	0	0	0.04	0	0	0	0	0	0	2.57
1883	Il1f9	uc008ioo	2.3e-10	0.01	0.01	0.01	0.05	0	0.1	0.02	0	0.03	0	6.91
1884	Il1f6	uc008ioq	7e-23	0	0	0	0.07	0	0.03	0	0	0	0	18.82
1885	Il1f6	uc008ior	2.1e-22	0	0	0	0.08	0	0.03	0	0	0	0	30.65
1886	Il1f5	uc008ios	2.2e-20	0	0	0	0.08	0	0.04	0	0	0	0	21.05
1887	Il1f5	uc012brp	2.4e-20	0	0.01	0	0.08	0	0.04	0	0	0	0	10.09
1888	Il1f5	uc008iot	2.8e-20	0	0.01	0	0.09	0	0.04	0	0	0	0	10.35
1889	Il1f10	uc008iou	1.7e-59	0	0	0	0	0	0	0	0	0	0	5.78
1890	Il1rn	uc008iov	5.6e-08	0.07	0.09	0	0.08	0.07	0.34	0.04	0.02	0.03	0.04	3.91
1891	Il1rn	uc008iow	6.1e-08	0.08	0.1	0	0.08	0.07	0.35	0.05	0.02	0.03	0.04	6.6
1892	Il1rn	uc008iox	5.5e-08	0.07	0.09	0	0.08	0.07	0.34	0.04	0.02	0.03	0.04	6.58
1893	Psd4	uc008ioy	6.7e-11	0.57	0.38	0.09	0.33	0.12	2.6	0.12	0.09	0.12	0.08	4.63
1894	Psd4	uc008ioz	6.7e-11	0.61	0.4	0.1	0.35	0.13	2.77	0.13	0.09	0.13	0.08	2.85
1895	Psd4	uc008ipa	7e-11	0.6	0.39	0.1	0.34	0.13	2.76	0.13	0.09	0.12	0.08	1.46
1896	Ehmt1	uc008ipg	9.2e-19	10.05	9.05	7.85	7.54	5.42	7.11	5.99	5.37	6.86	5.86	5.52
1897	Ehmt1	uc008ipi	2.1e-16	7.71	6.53	6.54	6.18	4.48	5.99	5.39	4.19	5.92	5	9.21
1898	Ehmt1	uc012brr	9e-17	7.88	6.68	6.67	6.3	4.57	6.12	5.49	4.27	6.04	5.09	7.57
1899	Ehmt1	uc008iph	1.7e-16	7.89	6.68	6.67	6.32	4.6	6.12	5.51	4.3	6.07	5.11	7.66
1900	Ehmt1	uc008ipj	2.1e-16	7.74	6.56	6.57	6.2	4.5	6.01	5.41	4.2	5.95	5.02	7.59
1901	Ehmt1	uc008ipk	1.5e-07	3.79	2.85	3.52	3.23	2.52	3.37	3.3	2.18	3.4	2.92	5.2
1902	Arrdc1	uc008ipn	3.6e-14	3.27	3.1	1.89	3.28	1.08	3.62	1.41	0.76	1.36	1.37	6.4
1903	Arrdc1	uc008ipm	3.6e-14	3.28	3.11	1.89	3.28	1.08	3.62	1.41	0.76	1.36	1.37	8.51
1904	Dph7	uc008ipq	4e-14	2.39	3.79	2	2.33	1.66	2.04	1.87	1.67	1.67	1.8	4.69
1905	Dph7	uc008ipr	4e-14	2.39	3.79	2	2.32	1.65	2.03	1.87	1.66	1.66	1.79	3.12
1906	Dph7	uc008ips	1.6e-14	2.44	3.84	2.01	2.34	1.64	2.07	1.9	1.67	1.69	1.79	3.14
1907	Mrpl41	uc008ipu	6.1e-28	12.14	14.95	6.06	6.83	5.3	6.02	6.42	4.75	9.5	6.44	10.88
1908	Dph7	uc008ipt	4.8e-14	2.16	3.32	1.76	2.07	1.46	1.81	1.65	1.46	1.49	1.59	8.03
1909	Pnpla7	uc008ipv	3.2e-09	6.6	6.73	12.49	6.58	7.02	7.05	8.71	5.68	6.02	8.09	4.31
1910	Pnpla7	uc008ipw	4e-09	9.03	10.43	16.09	8.01	8.18	9.04	10.18	6.44	7.37	10.3	7.44
1911	Pnpla7	uc008ipx	5e-09	8.92	10.33	15.85	7.88	7.98	8.9	9.98	6.29	7.23	10.09	8.91
1912	Pnpla7	uc008ipy	4.3e-09	9.5	11.06	16.93	8.35	8.42	9.45	10.57	6.58	7.68	10.71	9.18
1913	Pnpla7	uc012brs	4.3e-09	9.36	10.9	16.7	8.22	8.3	9.32	10.43	6.49	7.58	10.56	9.44
1914	Pnpla7	uc008ipz	2.4e-09	10.45	13.48	17.52	8.16	7.85	9.81	9.78	5.92	7.56	10.99	10.38
1915	Nsmf	uc008iqa	9.6e-14	0.75	1.27	0.55	0.58	0.19	0.48	0.35	0.17	0.46	0.28	6.27
1916	Nsmf	uc008iqb	2.3e-19	5.15	8.66	3.6	5.18	1.58	2.78	2.36	1.12	3.27	2.07	4.86
1917	Nsmf	uc008iqc	1.9e-19	5.11	8.58	3.56	5.15	1.58	2.74	2.32	1.1	3.23	2.05	8.52
1918	Nsmf	uc012brt	1.9e-19	5.13	8.61	3.57	5.16	1.59	2.75	2.33	1.11	3.24	2.05	8.49
1919	Nsmf	uc008iqe	2e-19	5.26	8.82	3.66	5.31	1.63	2.82	2.39	1.14	3.33	2.11	8.61
1920	Nsmf	uc008iqd	1.6e-19	5.19	8.72	3.61	5.2	1.61	2.78	2.37	1.12	3.26	2.08	8.57
1921	Noxa1	uc008iqi	6.9e-08	0.02	0.01	0.01	0	0	0.02	0	0	0	0	28.84
1922	Tor4a	uc008iql	1.3e-13	2.55	1.5	0.9	0.7	0.54	1.86	0.57	0.4	0.91	0.72	1.71
1923	Nelfb	uc008iqn	2e-17	15.61	16.08	11.22	10.23	6.18	10.58	8.18	5.17	10.82	8.04	10.37
1924	Nelfb	uc008iqm	2.1e-17	16.3	16.79	11.72	10.69	6.46	11.05	8.55	5.41	11.31	8.4	19.55
1925	Nrarp	uc008iqk	1.1e-21	4.54	3.85	2.46	0.77	3.39	2.5	2.3	3.36	2.96	3.74	5.02
1926	Tubb4b	uc008iqs	1.3e-19	53.58	53.37	41.92	32.94	27.9	63.83	40.87	23.77	41.2	25.66	35.7
1927	Slc34a3	uc008iqt	3.7e-11	0	0	0	0	0	0	0	0	0	0	35.72
1928	Cysrt1	uc008iqv	1.3e-16	0	0.05	0	0.08	0	0.05	0.01	0	0.03	0	28.92
1929	Rnf208	uc012bru	2.5e-11	0.43	1.04	0.05	0.09	0.01	0.07	0.02	0.02	0.07	0.01	2.96
1930	Ndor1	uc008iqw	3.1e-19	4.05	4.6	3.27	4.15	1.66	3.29	2.42	1.29	2.92	2.12	30.5
1931	Ndor1	uc012brw	2e-19	4.16	4.73	3.33	4.26	1.71	3.39	2.48	1.34	2.98	2.17	9.28
1932	Ndor1	uc008iqx	1.4e-19	3.9	4.46	3.23	3.91	1.55	3.16	2.32	1.25	2.78	2.03	9.44
1933	Ssna1	uc008irb	6.2e-14	23.69	24.31	16.24	16.48	11.47	12.81	14.36	9.17	18.41	14.73	20.59
1934	Tprn	uc008ira	2.2e-20	1.45	1.29	0.7	1.18	0.52	0.63	0.63	0.34	1.31	0.55	21.21
1935	Anapc2	uc008ird	2e-12	14.56	15.68	12.67	12.82	7.67	11.19	9.82	5.93	10.93	9.72	11.67
1936	Anapc2	uc008ire	2e-12	13.7	14.74	11.92	12.06	7.21	10.53	9.23	5.58	10.28	9.14	18.76
1937	Ssna1	uc008irc	6.2e-14	22.68	23.27	15.55	15.78	10.98	12.26	13.74	8.78	17.62	14.1	18.43
1938	Lrrc26	uc008irg	3.3e-15	0	0.2	0	0	0	0.32	0.01	0	0.01	0	3.79
1939	Dpp7	uc008irq	7.5e-18	9.17	12.24	6.3	3.07	4.14	5.81	5.98	3.55	4.62	4.71	5.84
1940	Uap1l1	uc008irr	3.7e-18	5.26	7.57	1.68	3.36	1.06	2.16	1.75	0.6	2.87	1.18	9.33
1941	Man1b1	uc008irp	5.4e-12	10.39	11.2	8.1	8.77	7.5	7.84	8.06	6.4	7.81	8.3	10.26
1942	Entpd2	uc008irw	2.9e-18	6.33	9.37	4.73	7.96	2.02	2.99	2.82	1.75	2.9	2.16	5.56
1943	Npdc1	uc008irx	1e-16	7.69	10.32	4.37	5.64	2.09	3.02	2.83	1.73	3.21	2.3	13.92
1944	Npdc1	uc008iry	2.3e-19	9.59	12.25	4.84	6.67	2.63	3.64	3.32	2.13	4.03	2.8	17.75
1945	Abca2	uc008isc	2.2e-13	5.53	9.02	4.51	3.07	1.66	3.41	3.04	1.16	3.29	2.54	2.86
1946	Uap1l1	uc008irs	3.8e-18	5.41	7.71	1.74	3.37	1.07	2.21	1.79	0.59	2.88	1.18	3.67
1947	BC029214	uc008ise	2.9e-14	7.19	10.38	4.95	7.34	3.35	4.51	3.88	2.56	5.23	3.84	7.89
1948	Ptgds	uc008isf	1.8e-08	0.62	3.63	0.17	0.09	0.04	0.15	0.04	0	0.18	0.03	4.36
1949	C8g	uc008isi	4.5e-18	2.71	1.83	1.68	0.21	1.3	1.09	1.09	0.89	0.83	1.74	1
1950	Clic3	uc008isd	3e-10	1.05	0.38	0.05	0.09	0.05	0.13	0.05	0.02	0.1	0.09	12.76
1951	Fbxw5	uc008isj	1.4e-07	27.83	27.31	37.36	16.09	15.37	26.03	22.94	11.44	22.41	21.62	25.01
1952	Traf2	uc008isl	1.8e-07	6.11	4.75	6.25	2.87	4.21	6.91	5.79	3.5	5.46	4.75	3.96
1953	Traf2	uc008ism	1.9e-07	6.03	4.69	6.16	2.83	4.15	6.81	5.71	3.46	5.38	4.69	6.32
1954	Fbxw5	uc008isk	6.4e-08	21.45	21.22	27.43	12.18	11.3	19.35	16.96	8.4	16.94	15.89	13.27
1955	Mamdc4	uc008iso	2.3e-18	1.3	1.02	0.61	0.15	0.2	0.41	0.37	0.17	0.61	0.32	3.6
1956	Phpt1	uc008isp	1e-09	91.93	112.53	82.56	42.74	50.88	55.89	66.73	34.37	92.1	73.34	37.75
1957	Rabl6	uc008isr	6.1e-09	35.71	26.15	37.9	20.71	37.06	32.98	37.36	33.08	33.7	41.38	15.74
1958	Rabl6	uc008iss	1.9e-08	17.29	13.15	17.65	10.44	18.28	15.91	18.29	15.63	16.29	21.58	23.28
1959	Rabl6	uc008ist	2e-12	41.04	29.1	42.5	25.75	47.25	39.68	46.26	42.49	40.85	52.58	24.59
1960	Rabl6	uc008isu	8.6e-22	9.05	5.88	8.77	6.16	11.77	9.35	10.88	11.87	9.85	11.62	20.31
1961	Ccdc183	uc012bsc	8.9e-10	0	0	0	0	0	0	0	0	0	0	3.34
1962	Edf1	uc008isn	8.5e-08	37.14	42.43	34.74	23.18	13.63	21.02	22.94	8.94	24.56	18.78	26.11
1963	Ccdc183	uc008isv	5.6e-12	0	0	0	0	0	0	0	0	0	0	26.1
1964	Tmem141	uc008isy	5.3e-16	8.68	13.11	8.03	3.9	6.54	5.98	5.2	5.72	4.13	6.85	6.89
1965	Tmem141	uc008isx	1.9e-15	7.11	10.41	6.54	3.15	5.2	4.76	4.24	4.52	3.39	5.4	12.35
1966	Fcna	uc008isz	5.3e-12	4.36	3.36	1.01	2.16	1.35	1.38	1.35	1.35	1.35	0.35	7.15
1967	Fcna	uc012bsd	5.6e-12	4.43	3.41	1.03	2.19	1.37	1.4	1.38	1.37	1.37	0.36	1.7
1968	Bmyc	uc008itg	3.3e-11	2	3.36	1.42	1.06	1.25	1.32	1	1.41	1.05	1.15	0.97
1969	Camsap1	uc008itt	4.4e-16	5.28	4.17	5.76	6.81	5.94	5.08	6.4	6.06	6.22	5.48	2.25
1970	Camsap1	uc008itu	1.1e-16	4.69	3.59	5.21	6.19	5.29	4.61	5.82	5.25	5.6	4.91	3.85
1971	Camsap1	uc008itw	2.2e-13	4.75	3.26	5.76	6.75	5.25	5.06	6.49	4.58	6.06	5.21	3.71
1972	Ubac1	uc008ity	3.2e-12	43.99	40.16	56.42	31.11	50.51	48.29	47.54	45.46	36.1	55.76	20.67
1973	Ubac1	uc008itz	3.5e-11	45.17	39.35	58.86	33.38	50.4	50.49	50.34	44.98	38.02	55.18	40.39
1974	Ubac1	uc008iua	6.4e-07	53.81	43.85	69.83	35.71	44.91	58.64	53	37.47	42.26	55.58	43.31
1975	Nacc2	uc008iub	1e-28	7.97	7.4	6.78	2.61	6.06	6.94	5.65	6.99	6.05	6.26	25.79
1976	Nacc2	uc008iuc	1.2e-28	8.61	8	7.33	2.82	6.56	7.5	6.11	7.55	6.54	6.77	5.71
1977	C330006A16Rik	uc008iue	7.6e-27	21.14	24.98	7.93	9.36	5.04	7.78	6.82	3.91	16.71	6.57	10.09
1978	C330006A16Rik	uc029twd	1.1e-26	19.52	23.1	7.32	8.58	4.64	7.16	6.29	3.62	15.46	6.04	8.77
1979	Qsox2	uc008iuj	2.6e-24	2.71	3.42	2.15	2.74	1.75	1.81	2.13	1.68	2.13	1.57	5.57
1980	Qsox2	uc008iuk	7.1e-25	2.95	3.63	2.15	2.74	1.71	1.95	2.3	1.78	2.45	1.68	5.4
1981	Qsox2	uc008iul	6.6e-25	2.58	3.17	1.87	2.39	1.5	1.7	2.02	1.55	2.14	1.47	4.92
1982	Gpsm1	uc008iuo	2.9e-18	1.44	2.76	1.03	1.72	0.46	0.79	0.62	0.4	1	0.59	1.83
1983	Gpsm1	uc008iun	4e-18	1.45	2.71	1.01	1.68	0.44	0.77	0.63	0.39	0.98	0.58	3.56
1984	Gpsm1	uc008iup	4e-18	1.42	2.66	0.99	1.65	0.43	0.76	0.61	0.38	0.96	0.57	3.45
1985	Gpsm1	uc012bsj	4e-18	1.72	3.21	1.2	1.99	0.53	0.91	0.74	0.46	1.17	0.69	3.78
1986	4932418E24Rik	uc008ium	4.3e-13	0.08	0.02	0	0	0	0	0	0	0.01	0	2.11
1987	Dnlz	uc008ius	2.1e-09	11.27	10.94	9.76	6.84	6.33	6.66	7.78	4.6	10.12	9.09	6.36
1988	Dnlz	uc012bsk	1.8e-09	11.28	10.96	9.7	6.68	6.22	6.66	7.75	4.46	10.02	8.93	12.63
1989	Dnlz	uc008iur	1.8e-09	11.29	10.97	9.71	6.69	6.23	6.67	7.76	4.47	10.04	8.94	12.65
1990	Card9	uc008iut	3.1e-07	0.73	0.19	0.19	0.43	0.11	0.2	0.17	0.07	0.41	0.12	6.81
1991	Snapc4	uc008iuu	1.6e-17	3.16	3.62	2.39	2.46	0.7	1.9	1.23	0.35	2	1.14	2.8
1992	Snapc4	uc008iuw	2.7e-19	3.41	3.83	2.31	3.13	1.07	2.03	1.61	0.73	2.41	1.51	4.4
1993	Snapc4	uc008iuv	1.8e-19	3.48	3.91	2.36	3.19	1.08	2.07	1.64	0.74	2.47	1.52	4.2
1994	Sdccag3	uc008iux	4.6e-23	21.21	23.92	13.27	12.96	8.5	13.33	11.28	8.04	15.17	10.43	14.37
1995	Sdccag3	uc008iuz	6.2e-22	20.36	22.18	12.81	12.53	8.41	12.65	11.25	7.63	14.83	10.31	23.42
1996	Sdccag3	uc008iva	5.8e-22	21.02	22.88	13.22	12.96	8.69	13.07	11.63	7.89	15.34	10.65	22.71
1997	Sdccag3	uc008iuy	6.2e-22	18.97	20.69	11.95	11.68	7.83	11.8	10.48	7.11	13.82	9.61	21.95
1998	Sdccag3	uc008ivb	1.8e-14	10.17	10.11	6.23	6.3	4.27	5.83	6.01	3.62	7.33	5.07	14.98
1999	Gpsm1	uc008iuq	1.2e-18	1.92	3.9	1.38	2.48	0.71	1.08	0.88	0.63	1.4	0.89	7.32
[truncated: 26,892 more rows]
