# Supplementary material for: Transcriptional profiling reveals extraordinary diversity among skeletal muscle tissues
Source: eLife journal article supplement (doi:10.7554/elife.34613), 2018-05-29
Supplement: supp [file elife-34613-supp-v1.zip › elife_poa_e34613_Supplementary_file_3.xlsx]

## Sheet: Sheet1
Rank	Gene Symbol
1	Tnnt3
2	Pvalb
3	Mylpf
4	Tnnc2
5	NA
6	Myl1
7	Tpm1
8	Atp2a1
9	Myh4
10	Acta1
11	Myl2
12	Nppa
13	Ckm
14	Aldoa
15	Actc1
16	Ttn
17	Tnnt2
18	Acta2
19	Eno3
20	Atp2a2
21	Casq1
22	Mb
23	Tmsb4x
24	Myh6
25	Tnni3
26	Mgp
27	Neb
28	Myoz1
29	Pygm
30	Myl7
31	Tagln
32	Pln
33	Actn3
34	Myl9
35	Tpm2
36	Bgn
37	Pam
38	Myl4
39	Myh1
40	Mybpc2
41	Mybpc1
42	Pfkm
43	Tnnc1
44	Myl3
45	Slc25a4
46	Car3
47	Fabp4
48	Vim
49	Lipf
50	Myot
51	Pgam2
52	Bpifa2
53	Ampd1
54	Sln
55	Ndrg2
56	Sparc
57	Igfbp7
58	Ldha
59	Flna
60	Dstn
61	Srl
62	Lpl
63	Gsn
64	Ankrd23
65	Vdac1
66	Scd1
67	Myh11
68	Clu
69	Pgm2
70	Dcn
71	Csrp3
72	Trdn
73	Ugp2
74	Tpi1
75	Rtn4
76	Fhl2
77	Tmem38a
78	Mylk4
79	Ckmt2
80	Sar1b
81	Xirp2
82	Tcap
83	Ech1
84	Cst3
85	Ctgf
86	Sepw1
87	Cpe
88	Cox4i1
89	Ybx3
90	Csrp2
91	Sh3bgr
92	Csrp1
93	Eln
94	Cryab
95	Tmod4
96	Hspb6
97	Postn
98	Mlf1
99	Idh2
100	Eef1a1
