# Supplementary material for: Transcriptional profiling reveals extraordinary diversity among skeletal muscle tissues
Source: eLife journal article supplement (doi:10.7554/elife.34613), 2018-05-29
Supplement: supp [file elife-34613-supp-v1.zip › elife_poa_e34613_Supplementary_file_4.xlsx]

## Sheet: Sheet1
Skeletal 1	Skeletal 2	Cardiac	Smooth
Ppp2r3d	Coq8a	Myl2	Ear3
Tnnt3	Vamp5	Actc1	Mfrp
Tpm1	Scnm1	Tnnt2	Mgp
Pvalb	Akt2	Atp2a2	Tmsb4x
Mylpf	Flcn	Myh6	Dcn
Tnnc2	Aldh1l1	Tnni3	Dstn
Myl1	Crhr2	Pln	Cpe
Myh4	Art5	Myl3	Rgs5
Tpm2	Nol3	Tpm2	Fn1
Pygm	Znrf1	Lpl	Postn
Casq1	Tpcn1	Fhl2	Col3a1
Myoz1	Ablim2	Ech1	Ctgf
Actn3	Bace1	Fabp3	Itga8
Mybpc2	Rapsn	Idh2	Col1a2
Myot	Tmem25	Cd36	Pls3
Ldha	Cstf1	S100a1	B2m
Ampd1	Mn1	Acadl	Serpine2
Rtn4	Lrp4	Bsg	Mir3064
Tpi1	Pola2	Aco2	Ogn
Ccng1	Pfas	Acaa2	Itgb1
Trdn	Prr29	Cs	Serping1
Tmem38a	Fam179a	Ivns1abp	Cald1
Sar1b	Chrdl2	Oxct1	Sepp1
Sh3bgr	Mtcl1	Acadvl	Itm2b
Mylk4	Fgfr4	Acadm	Timp3
Pgm2	Lzts1	Casq2	Rpl4
Mlf1	D630033O11Rik	Hadha	Nov
Pkia	Pde6g	Ndufa10	Hspa5
Serpinb6a	Adck3	Crip2	Npnt
Ube2b	Hmcn2	Ogdh	Cav1
Cnbp	Dync1li1	Idh3g	Serpinf1
Xirp2	2310007L24Rik	Etfdh	Timp2
Psap	Soga2	Hadh	C7
Capza2	Pole	Etfa	Hsp90b1
Cd24a		Ptgds	Myom2
Tmod4		Dlst	Tgfbi
Ptp4a2		Pdhb	Col1a1
Cmya5		Gja1	Tm4sf1
Phka1		Echs1	Cd200
Mylk2		Adprhl1	Calu
Cfl2		Cpt1b	Pdia3
Csde1		Myzap	Ccdc3
Nrep		Ctnna1	Laptm4a
Ppp1r3c		Pygb	Ctsl
Calm1		Acat1	Fmo2
Fxr1		Tecr	Cyr61
Mef2c		Fndc5	Sh3bgrl
Cul3		Ryr2	Dpt
Smyd1		Hopx	Rps11
Park7		Eci1	Msn
Ywhae		Decr1	Nedd4
Mettl21c		Ephx2	Lum
Ttn		Hibadh	Susd5
Zfp106		Dsp	App
Phkb		Fkbp4	Cytl1
Synm		Ivd	Itgbl1
Ddit4l		Reep5	Anxa1
Psmb7		Atf4	Nptn
Rab10		Acss1	Ctnnb1
Ube2d1		Pmpcb	Mir546
Phkg1		Lrtm1	Filip1l
Tbx15		Hadhb	Cfh
Psma6		Fam174b	Serinc3
Ryr1		Hsdl2	Rcan2
Asb5		Vegfb	Cped1
Rab12		C130080G10Rik	Fkbp9
Agl		Mcee	Oat
Scn4b		Saraf	Ddx5
Slc25a12		Cpt2	Ly6a
Naa50		Hsd17b10	Sparcl1
Pfn2		Sptbn1	Rnase4
Prkab2		Ppif	F3
St3gal6		Prkaca	Mbnl1
Skp1a		Inpp5a	Arpc2
Rnf11		Rrad	Vcl
Ppp3cb		Eci2	Sfrp2
Anapc5		Car14	Lhfp
Cacna1s		Adk	Itga9
Ppp3r1		Ptgr2	Fgl2
Tcea3		Cox20	Serpine1
Asph		Tango2	Clec3b
Atl2		Herpud1	E030013I19Rik
Psmd6		Clasp1	Dhrs7c
Psme4		Gstk1	Nox4
Gpcpd1		Mtx2	Cnn3
Prkar1a		Sorbs2	Msrb3
Cacna2d1		Kcnip2	S100a10
Smim10l1		Gm10336	Fos
Hnrnpa2b1		Mhrt	2018-09-15
Ssr3		Lmo7	Pcolce
Usp47		Ly6c1	Dnajb4
Smyd2		Chchd7	Gdf10
2310040G24Rik		Entpd5	Rpl7
Cacng1		Il10rb	Pi16
Dnaja2		Ifngr2	Cd34
Stac3		Sdpr	Crispld2
Strn3		BC004004	Smoc2
Fundc2		Slc44a2	Cdc42
Myoz3		Prkag1	Calm2
Vapa		Psme1	Gpi1
Sypl2		Pkig	Gpx8
Cyb5a		Clybl	Ppp1r12a
Ppp1r3a		Fitm2	Ctsh
Rab2a		Creg1	Tmem59
Smtnl2		LOC102636514
Kif1b		Sspn	Cpq
Klhl31		Shisa4	Eif4g1
Psmd8		Poldip2	Fbln5
Itm2a		Slc35f5	Fkbp7
Rhoq		Kdr	Rpn2
Camk2a		Alas1	Picalm
Arpc5l		Cdh5	Ecm2
Cops5		Smpd1	Twsg1
Hdgf		Acad11	Rps4x
Psmc6		Fuca2	Tuba8
4833439L19Rik		Slc16a1	Eif1
Fbxo32		Rbm20	Ephx1
Cap2		Fhod3	2018-09-07
Rragd		Chmp4b	Atp6ap1
Lrrc30		Tcp11l2	Id2
Kpna1		Emcn	Hnrnph1
Kcmf1		Gpihbp1	Clk1
Vdac3		Jam2	Pla2g16
Ppp2r3a		Mrps35	Dpep1
Kpna3		Epas1	9530068E07Rik
1700020I14Rik		Lgals4	Lrrfip1
Tfrc		Dhrs11	Ywhab
Spop		Nceh1	Phlda3
Gpt2		Ptpn11	Gucy1b3
Prkrir		Cdh2	3110039I08Rik
Pigp		Afg3l2	Txn1
Thoc7		Tnni3k	Canx
Aldh1a1		Maob	Tspan2
Nrd1		1810011O10Rik	Ankrd40
Zfp91		Slc25a13	Plpp3
Jph1		Anp32a	Capn2
Pfkfb3		Msrb2	Arf4
Cib2		Mccc1	Hexa
Aamdc		Pkp2	Tmem147
Zfand6		Tesc	Prss23
Rps27l		Dhrs4	Entpd1
Klhdc2		Ppip5k2	Anxa3
Setd7		Plin3	Rab1a
Ghr		Auh	Fibin
Mat2a		Prepl	Fbxo40
Aimp2		Apip	Degs1
Tmem258		Vwa8	Map3k7cl
AI314180		Dtnbp1	Malat1
Hipk3		Parp3	Fam129a
Psmd12		Flot1	Atp1b3
Ubxn2a		Timm10	Wls
2310065F04Rik		R3hdm2	Ace
Zcrb1		Hk1	Prdx4
Scn4a		Slc12a7	Rexo2
Htatsf1		Podxl	Tpm4
Ddx1		Cyfip2	Mmp2
Commd3		Ogdhl	Lpin1
Tsc22d3		Mut	Kcnab1
Dcaf6		Nqo1	Cltc
Tceb1		Mir3962	Mmp3
Ndufb4		Nrp1	Pcolce2
Smox		Pfkfb2	Sulf1
Hspa8		Hmox2	Il6st
Mff		Bckdhb	Sdcbp
Cct8		Lrrc10	Ahnak
Cbfb		Stk39	Lpp
Eif5		Gata4	Rac1
Wwp1		Tsc22d4	Smim14
Cab39		Iars2	Rgs4
Arl8b		Palld	Dcaf11
Schip1		Efcab2	Gdi2
Ppm1a		Nebl	Pgrmc1
Sgk1		Caprin1	Cxcl12
Rdx		Lclat1	Lrrc17
Stradb		Plin5	C1s1
Tob1		Il15	Plcb4
Slc38a4		Cd300lg	Rnd3
Nek7		Gcdh	Mtfr1l
Tspan8		Alpk2	Tm9sf2
Psmd1		Zmynd11	Gucy1a3
Dazap2		Cish	Slc43a3
D17Wsu92e		Pla2g5	Cygb
Dcun1d5		Mettl9	Ndrg1
		Atp5g1	Fam198b
Lrrc20		Frmd5	Col6a3
Atp1b2		Gstm7	Wbp5
Pla2g7		Oxnad1	Pgm5
Rab28		Afap1l1	Hnrnpu
Ei24		Nf2	2018-09-02
Rbfox1		Adhfe1	Gpc3
Clec2d		Arhgap29	Scara5
Strap		Slc4a3	Kcnmb1
Riok3		Mrpl39	Rtn3
Ube2g1		Ccdc141	Stt3a
Dnase1l1		Osbp	Olfml3
Prkaa2		Trmt5	Hexb
Spag9		Mccc2	Fmo3
Jtb		Tecrl	Scarb2
Cops3		Anapc16	Slit3
Nmrk2		Igf2r	Colec12
Pnpla8		Mdp1	Esyt2
Kpna4		Efnb3	Ik
Clic5		Huwe1	H3f3b
Rmnd5a		Akap2	Ppt1
Sypl		Scn5a	BC005537
Kcna7		Dbt	Cetn3
Eprs		Ppm1k	Dynlt3
Phtf2		Slfn5	Gabra3
Dcaf8		Ppp2r5c	Tmem123
Prr33		Rras2	Trap1
Srpr		Cd93	Emb
Tmem64		43161	Asah1
Mllt11		Slc8a1	Bmpr1a
Dpp8		Dtna	Ostc
Plcd4		Gna12	Cdc42ep3
Ano5		S1pr1	Fam213b
Prkar2a		C330006A16Rik	Pdlim5
Jak1		Mapre2	Rps3a1
Aimp1		Suclg2	P2rx1
Nek9		Ank2	Pdgfrl
Ky		Iigp1	Ssb
Cops2		Gpsm1	Hnrnpab
Tab2		Tomm5	Asph
Ap4s1		Sel1l3	Ccpg1
Rfk		Rit1	Cav2
Adi1		Gmnn	Col14a1
Rassf3		Pde2a	Uba2
Tmem233		Acot7	Endod1
Tef		Trmt2b	Lox
Vbp1		Strip2	Smarca2
Eif3e		43347	Egr1
Cops4		Bicd2	Rock1
4930453N24Rik		Lman1	Fbxo30
Fbxo3		Blcap	Tgfb3
Psma4		9030617O03Rik	Pcdh7
Ufc1		Irak1	Polr1d
Slc37a4		Atf6	Fxyd5
Tnks2		Apbb1	Pdia4
Ube2e1		Bfar	Tax1bp1
Ccdc43		Ryk	Ncam1
Mcts1		Ets1	Raf1
Pcmt1		Cpeb3	Ddr2
Snx5		Lpgat1	Plpp1
Cul1		Daam1	Rap1b
Sugt1		Aplnr	Hmgn1
Slc16a3		Rab3ip	Klf6
Etf1		Cacnb2	Adamts1
Snrnp27		Kcng2	Chmp3
Tmed9		Kitl	Pdgfd
Mtdh		Ociad1	Tgoln1
Hacd1		Sync	Antxr1
Ehbp1l1		Slc35f6	Hnrnpdl
Capn3		Rab5b	Fam114a1
Smco1		Hfe	Dnajc10
Fgf1		Fbxw7	Serp1
Bccip		Tjp1	Map1b
Clcn1		Ttll1	Ctsk
Eif2s2		Xdh	Cfdp1
H1f0		Lace1	Fbn1
Mpp6		Dapk2	Mir704
Cd55		Mrpl49	Ppic
Mstn		Naa35	Pi15
Dnajc21		Pitrm1	Sec11a
Cript		Ptprm	Arcn1
Prkag3		Alkbh7	Tm9sf3
Mir5116		Mrps27	Pawr
Abcb4		Lamb1	Fas
Snapin		Tmem141	Bnip2
Gm21949		Abhd18	Sf3b1
Fus		Arfrp1	Selk
Hif1an		Mgat4b	Amfr
Mapk14		Ptprb	Srsf6
Zfand5		Fam101b	Dst
Polb		Hspa4l	Hspa4
Dars		Ints4	Sdc2
Pdf		Lsm14b	Sgce
Pacsin2		Hdhd2	Glg1
Sec23a		Ccnd1	Tnc
Dram2		Tcf4	Tbca
Paip2b		1010001N08Rik	Emc7
Map2k4		Nsmce1	Cops8
Usp25		Tmem204	Ccni
Stom		Rap1gap2	Zfp36
Hdac2		Cobll1	Abi3bp
Ccdc91		Acad12	Gng12
Rnf7		Gatb	Atl3
Pno1		Pcsk6	Hmgcs2
Oxr1		Smap2	Sfrp4
Psmd14		Tmem246	Rpl35a
Rsl1d1		Tars	Sema3c
C2cd2		Cyp4b1	Srsf2
Golph3		4930402H24Rik	Epb41l2
Ulk2		Ndufaf2	Tmem47
Rcsd1		Gpd1l	Enah
Bpgm		Gpr146	Nfe2l2
Foxo4		Dap3	Mir8108
Rad23b		Itga6	Hmgn3
Dtna		Ezr	Dek
Shisa2		Ralgapa2	Arglu1
Fyttd1		Lamtor3	Leprot
2018-03-06		Mir1903	Ccnd2
Chordc1		Ppil1	Fat1
Hrasls		Plekha6	Gnb4
Cacybp		Gab1	Mrps28
Trim35		Lzic	Gm561
Ackr3		Azi2	Adamts2
Fez2		Mllt4	C1qtnf2
Tor1aip1		Arel1	Entpd2
Cog6		Rnf34	Mbd2
Maf		Acot2	Gpsm2
Atp6v1g1		Prkab1	Pnrc2
Padi2		Rasl10b	Hprt
Gpbp1		Agtr1a	Naca
Tarsl2		Phactr2	Mtpn
Cse1l		Supv3l1	Tuba1a
B230118H07Rik		Tmem201	Iqgap1
Arih1		Ablim3	Nucb2
Nol7		Dcakd	Chmp5
Nr1d2		Atxn2	Nid1
Six1		1600014C10Rik	Copb1
Hoxc10		Abhd17c	Zfp36l1
Smad3		Ddit4	Vps29
Tigar		Dcaf12	2900026A02Rik
Insig2		Dip2c	Snhg1
Pdp1		Aig1	Magoh
Eps15		Pip5k1b	Mcfd2
Rdh14		Arhgef15	Ppp2cb
Cpeb1		3110002H16Rik	Aaed1
Man2a2		Tmem144	Ppp1r12b
Fem1a		1190002N15Rik	Rpl23
Sesn1		1700040L02Rik	Dync1i2
Srp19		Krt222	C2
Cyp27a1		Zfp672	Fam13c
Serbp1		8430408G22Rik	Mxra7
Araf		Scgb1c1	Cpxm2
Pcyt1a		Gnb5	Maged2
Gid4		Rai2	Anxa4
Cnep1r1		Ctnnal1	Enpp5
Scrn3		Gramd4	Atp6v1a
Tmed4		Ecscr	Rbbp7
Arfgef1		Sbk1	Abca8a
Cnot7		Pvr	Luc7l3
Capn7		Kank3	Itpr1
5031439G07Rik		Mitf	Gas1
Narf		Atf7ip	Asb10
Ubac1		Mov10l1	4930523C07Rik
Alkbh5		Cars	Ucp3
Hbp1		Slc7a1	Plod2
Zbtb18		Car4	Art4
Uso1		Paqr9	Prkacb
Eif4ebp2		Dnajc30	Ifngr1
Ccnk		Tbc1d16	Rin2
Ibtk		Tmem218	Pnisr
Rabgef1		Kifc3	Eid1
Mapk1		Rbp7	Rrbp1
Ppp6c		Emilin2	Plekha1
Rbx1		Med4	Casp12
Malsu1		Fyn	Klhl21
Tsnax		Slc28a2	Npm1
Pde4b		Kcnd2	Matn2
Plekhb1		Vps13d	Actr2
Snhg6		Mrm1	Son
Sf3b2		Bcl6b	Ptprz1
Exoc6		Gpr22	Smc1a
Mllt3		Btnl9	Dnajc3
Reep1		Rftn1	Matr3
Metap1		Trmt1l	Pltp
Wdr26		Fastkd1	Glt8d1
Fam174a		Plscr2	Zc3h11a
2310001H17Rik		Mpped2	Ywhaz
Bcap29		Adgrg1	Rcn1
Abcf2		Stard8	Npy1r
Impad1		2810025M15Rik	Tgfbr2
Farsb		Lyrm9	Vegfd
Eif2a		Gck	B230219D22Rik
Crot		Mmaa	Abracl
Tmem126b		Fv1	Fam26e
Eepd1		Naa40	Srsf7
Tra2a		Aldh5a1	Neo1
Stat5b		Rdh13	Ntan1
2700060E02Rik		Airn	Dhx15
Dupd1		Igsf1	Pde5a
Tomm70a		Sdc3	Trpc4ap
Rbm5		Smarcd1	Glipr1
1810026J23Rik		Camta1	Actr3
Nrbp1		Mcat	Zfp207
Gm44505		Cog5	Errfi1
Ppm1l		Ctnna3	Gnai3
Tor1aip2		Kat8	Sec62
Ccny		Mrpl41	Asap2
Cgrrf1		Hmbs	Srsf11
Ccz1		1110034G24Rik	Napepld
0610009B22Rik		Tmem245	Ubl7
Lsm3		Elk3	Yipf4
Smim13		Robo4	Ubqln4
Homer1		Armc2	Vcan
Zfyve9		Usp46	Pros1
Abce1		Colec11	Atp6ap2
Ola1		Arhgef7	Snord123
Ak6		Coprs	Clec11a
Mrpl32		Cmtm8	Ano1
Tmem9b		Arhgap26	Tmem167b
Ppid		Rbmx	Mir703
Ttll7		Myh7b	Hnrnpul2
Hdac3		Mrrf	Sft2d2
Tceal7		Trib2	Tgfbr1
Dpm1		Tmem186	Ids
Ttc33		Dock9	Rsrc2
Tmem5		Myct1	Kidins220
Snw1		Fam126a	Cdip1
E030003E18Rik		Pde1c	Lbp
Ccdc50		Arhgap18	Samd4
Trip12		Rsad2	Tmx1
Calcoco1		Cxadr	Rabl6
Ttc1		Higd1b	Dnajb11
Tapt1		Slf1	Arl4a
Ociad2		Ak4	Hnrnpc
Vps4a		Gm13375	Zeb1
Sav1		Gm3646	Gjc1
Asb12		Gbp9	Clk4
Mrps18c		Aldob	Gpc6
Pstpip2		Sema7a	Krcc1
Yap1		Desi1	Ist1
1500011K16Rik		Paqr4	Mertk
Zc3h15		Adra1b	Serpini1
Oxsr1		Pdgfb	Fuca1
Csnk2a1		Ttc17	Mmp14
Pcmtd1		Nrp2	Mir6903
Mkln1		Heatr5b	Stx12
Vezf1		Ubfd1	Tmed7
Rap1gds1		Calr3	Pdgfra
Ngly1		Gbp4	Akt3
Cul2		Lnpep	Stx7
5730455P16Rik		Hspa12a	Stk24
Eif4g3		Hand2	Rragc
Cul5		Map3k4	Hey2
Denr		Cobl	Fam3c
Prps1		Brwd1	Stk38l
Qser1		Fnbp1l	Klhl30
Neurl1a		Ybx2	Chmp2b
Desi2		Trim25	Hif1a
Snx13		Hspa12b	Pkd2
Kcnc4		Ptprg	Syne1
Abcb7		Tada2a	Gnai1
Paip1		Mnat1	Stk17b
Eef1g		Eya3	Pid1
Mmgt1		Tec	Nudt9
Arfgap2		Arhgef19	Syap1
Tnmd		Erc1	Srsf1
Cdc123		Sox7	Rad21
Vmp1		Rab20	Ccdc68
Rchy1		Abhd10	Wsb1
Tatdn1		Trim68	Arpc5
Usp24		Meox1	2210013O21Rik
Ets2		Tnks	Gas5
Ccl11		B4galt6	Txndc15
Phf10		Zmynd8	Sorl1
Enpp4		Mir7657	Vcp
Setd3		Lyrm4	Mob1a
Arl6ip1		Med1	Top2b
Deptor		Irx4	Suds3
Cdnf		S1pr3	Bzw1
Ankrd28		Lysmd4	Fgfr2
Gatc		Zfp970	Rraga
Pdcd6		Bbs4	Akap12
Faf1		Cox4i2	Gem
Naa15		Gfod1	Timp1
Sppl2a		Lrrc8c	Atp6v1h
Sub1		Parp14	Papola
Vps37a		Cd38	Large
Uckl1os		D2hgdh	Tmem165
Pex2		Myo5b	Itih2
Snrpd2		Alox5	Medag
Epm2a		Kctd12b	C1ra
Prune		Gm16793	Impa1
Gtpbp4		Usp40	Mocs2
Hsf2		Gbp3	Sf3b6
Immp1l		Mcf2l	2210407C18Rik
Herc3		Pcdh12	Zfr
Rbm18		Smim3	Mark1
Sox6		D3Ertd751e	Slc25a17
Ergic2		Tmem88	Macf1
AI464131		Lrrc1	Kpnb1
Eif2ak1		Cenpf	Cog4
Usp16		Apln	Chrdl1
Gspt1		Nlrp10	Dab2
Dyrk1a		Haus7	Ccnl1
Acsl4		2810006K23Rik	Sfpq
Dnajc27		Yae1d1	Nsmce4a
Fundc1		E330011O21Rik	Ddx50
Rnf139		Nipal3	Tmem106b
Fbxl5		Coa4	Pla2g4a
Map2k6		Strn	Tbl1x
Spns2		Dnajc16	Skap2
Abcg2		Entpd6	Cpxm1
Abcd2		D830005E20Rik	Snx18
Srrm1		Pla1a	Osbpl3
Atp8a1		Plxna2	Gm2a
Zfp639		Zfp629	Serpina3n
Gdap1		Vps13c	Wwtr1
Slc12a2		Usp53	Fbln7
Sec61a2		Hsd17b7	Snx6
Pde7a		Vash1	Vcam1
Uchl5		Secisbp2	Dusp22
Zyg11b		Fgf16	Cyp1b1
Svip		Prkch	Lias
Znrd1as		Lmtk2	Mir8097
Mettl11b		Fam43a	Nfib
Col4a3bp		Pm20d1	Phldb2
Spast		Car8	Ddx6
Ppp2r2d		Agpat9	Eif2b5
Akap8		Dtx3l	Ikbip
Ino80c		Gca	Opa3
Pgk1		Garem	Boc
Nipa2		Atxn1	Wdr61
BC023829		Oas2	Snx9
Exoc4		Ppp1r9a	Dhx9
Ttc19		Pgpep1	AW549877
Lrrc38		Prkce	C1qtnf1
Pstk		Rapgef5	Crk
Zscan26		Aasdh	Reck
Fam69a		Intu	Gng10
Jak2		Pigg	Ywhaq
Rpa1		Bri3bp	Susd2
Rps6ka2		Rassf9	Cdc16
Otud6b		Phyhip	Ggnbp2
Vps36		Wdr33	Pa2g4
Mir133a-1		Dnaaf3	Adss
2018-03-05		Zfp655	Rbm7
Acsl3		Rtp4	Sel1l
Bbip1		Pgpep1l	Zfp146
Ppp2r2a		Phlpp1	Hnrnph3
Gm20300		Cdk18	Rbbp4
Clcn3		Kcna5	Rbbp9
Zfp24		Gbp5	Pnn
Pak1		E330017L17Rik	Thrb
Rpp14		Il18bp	Zc2hc1a
Glrx3		Acot1	Hipk1
Pias2		Nhlrc2	Fndc3b
Mir1a-1hg		Ttc30b	Bmp4
Srp9		Ceacam1	Utrn
Atg12		Dip2b	Myof
Map3k7		Ogfrl1	Lgals8
Pdcd5		Nostrin	Tusc3
P4ha2		Vegfc	Mir6950
Znrd1		Dmxl2	Unc50
Sos2		Nlk	Cxcl14
R3hdm1		Gm19522	Hsp90aa1
Tmed2		Sco1	Snx2
Crbn		D4Ertd617e	Eapp
Rb1cc1		Adap2	Trim44
Plcl2		Grm1	Ccl6
Zfp943		Llph	Pik3r1
Slc9a2		Spta1	Sumf1
4933434E20Rik		Polr1e	Coq10b
Tmem56		Klhdc8a	Gpnmb
Iars		Prelid2	Ywhah
Prpf18		Cep112	Tspan11
Elp3		Ngf	Cggbp1
Mapk9		Cdkl1	Lmo4
Ccdc25		Pkd2l2	Smim15
Exosc9		Fam175a	St6gal1
Prkca		Zfpm2	Ilf2
Tnfaip8		H2-T24	Mgat4a
Heatr3		Flt4	Arrdc3
Gm15179		Sybu	Prpf38b
Gtf3c6		E230013L22Rik	Ppp2r5c
Ppm1g		Adamts7	Cnot2
Tspan9		Shroom4	Lima1
Adamtsl5		Rreb1	Esd
Ube3c		E130307A14Rik	Api5
Eya4		Mettl15	Fam118a
Dnajc5		Map7	Scfd1
Brcc3		C4bp-ps1	Mcm6
Fam49b		Gm826	Pak2
Ddx23		Slc19a2	C1qtnf7
Ppp1r2		Ubxn10	Clmp
Lnpk1		She	Nap1l1
Tma7		E130311K13Rik	Lxn
Ift81		Fam84b	Xpo1
Fbxl4		Prex2	Gprasp1
Ppp1r11		Kcnv2	Bace2
Aqp4		Cadm4	Sec63
Ccdc6		Prn	Cfb
Ston2		Tlr3	Zfp809
9330159F19Rik		Mars2	Suox
Tpbgl		Gnpda1	Ang
Kcng4		Gm6416	Pdcd6ip
Irs1		Cox7c	Sf3b3
Cutc		Rffl	Cd47
Gm16062		Wdr92	Ugdh
Ptdss1		Aph1a	Csf1
Gphn		Cep95	Ssr1
Ube2q2		Iba57	Abi1
Exd2		Fut10	Vit
L2hgdh		Zfp956	Srsf3
Ubap1		Bcl2l11	Sacm1l
Eif3j1		Plekhg1	Uba5
Rora		Pak6	Glt8d2
Parp6		Dct	Atxn7l3b
Mlxip		Rbm4	Cd248
Tceb3		BC068281	Wdr82
Mark3		Tmem71	Rbms3
Mir7091		Acsm5	Fkbp14
Tfam		Cmpk2	2810403A07Rik
Cox11		Whrn	Tardbp
Acvr2a		Adrb1	Olfml1
Ebag9		Zfp507	Mapre1
Uri1		Gnb3	Mir7010
Ltv1		Nars2	Cnpy4
Cbwd1		Gm19461	Kdelc2
Vps50		Clec1a	Tmem11
Kbtbd12		Dnajc24	Lsm8
Ccnh		Rsad1	Efr3a
Slc25a16		St8sia4	Arf2
Armc8		Helz	P3h2
Zcchc17		Srrm4	Srpx
Mpp5		Depdc5	Adamts8
Mapk6		Slc35e2	Sfrp1
Il13ra1		Xaf1	Reep3
Coa6		Rfwd3	Cmpk1
Taf13		Nos2	Ptma
Ubap2		Stc2	Chsy1
Npc1		Timeless	Gkn3
2900097C17Rik		Gpr4	Nktr
Snap29		Zfand1	Cyp20a1
Ttc4		Fam161b	Map2k7
Zkscan3		Cryba4	Hnrnpa0
Tmem159		Wnt9a	Tcf12
Atp2b1		Plscr1	Trp53inp1
Satb1		Rhd	Tbx18
Kcnj8		Zfp366	Ube2j1
Ttc32		Nr0b2	Dctn4
Ireb2		Inadl	Cdh11
Tmem179b		2310039L15Rik	Cr1l
Tmcc1		Gm10635	Gbp2
Uspl1		Ifi44	Penk
Lcmt1		Vwa3a	Zmpste24
Kansl1l		D830032E09Rik	Adnp
Lsm12		Hcn2	Mars
Rab35		Mcc	Eif2b1
Tox4		Ifit1	Tmod3
1700025G04Rik		Ctla4	Leprotl1
Ppp2r5d		Ddc	Cdc42bpa
Samd8		Ramp3	Plrg1
Gm7120		Prnd	Msmo1
Gprc5c		Ifih1	Tmem18
Nup153		Itpripl1	Bclaf1
Trim24		Polq	Efnb2
Odc1		Sema6a	Aff4
Rwdd1		Ppp1r16b	Prpf39
Fam175b		Lcmt2	Angpt2
Zfp664		Zfp697	Rnf19a
LOC106740		Cep128	Ddx42
Cdkn2aipnl		Bend5	Zfp36l2
Hook3		Ripply3	Nfat5
Mybbp1a		Zbtb20	Bicc1
Cacul1		C230035I16Rik	Larp1
Fbxo22		Sgol2a	Rpl27a
Dnajc2		Olfr1396	Tm7sf3
Cdc42se2		Car7	Armc1
Tsr1		Lonrf2	Mfsd14a
Polk		B3gnt3	Ctps
Ube4a		Irx3	Ntn4
Hpf1		Zfp30	Higd1a
Ube2k		Stard4	Mgat2
Mtmr1		Gch1	Rbms1
Socs7		Gchfr	Seh1l
Kbtbd13		Sox12	Stard3nl
Rps6kb1		Upp1	Crim1
Bhlhe41		Papln	Itgav
Itpkb		Gm28979	Tusc2
Kera		Rsph3b	Bcl2l13
Sumo1		Ccdc189	Snrpb2
Eif2b3		Rwdd2b	Itpripl2
Mycbp		Nudt17	Tial1
Klhdc10		Dpysl4	Camk2n1
Cnksr1		Ggt5	Smurf2
Ube2n		Lrrc48	Vwa5a
Dirc2		Tal1	Mpp1
Pex11b		A630072M18Rik	2018-09-06
Pcbd2		Phf24	Kcne4
Rtca		Slfn3	Rpl18a
Ralb		C130046K22Rik	Gtf2b
Arih2		Ccnj	Foxc1
Rrm1		Ush1c	Yipf5
Ran		Meig1	Arf6
Prps1l3		5430416O09Rik	Casc4
Ethe1		Map10	Usp8
Ap1ar		Rest	Nop58
Lifr		Wscd1	Gtf2e2
Cwf19l2		Pdzd3	Il1r1
Haus1		Hecw2	Sema3d
Luc7l		Tgtp2	Nr2f2
2610044O15Rik8		Zfp428	Tmem87b
Ldah		Fgf18	Hmgn5
0610009L18Rik		Ssu2	Dpp7
Kcnq5		Thsd1	Spg20
Lgr4		Spc24	Igsf9b
Rnf150		Dhtkd1	Fchsd2
Snx12		Lilra5	Nab1
Pfkfb4		A330009N23Rik	Cbx5
Rpp30		2310069G16Rik	Tgfbr3
Naa25		Cnga3	Gab2
Apoo		Pde4b	Me3
Usp34		Pkdrej	Ppef1
Tmem117		St6galnac3	Mier1
Kdm7a		Kcne1	Rbm17
Orc3		Tmem74b	Ddx26b
Usp38		6430562O15Rik	Praf2
Rad17		Bambi-ps1	Pcsk5
Amigo1		Mycn	Dusp11
Actr8		Ptar1	Wasl
Snora28		Rtn4r	Cfap36
Cdkal1		Rhox5	C1galt1c1
Cyb5r4		Bend3	Anln
H2-T23		4921504A21Rik	Cdkn1b
Rhobtb3		Akr1c19	Stx16
Eif2s1		Dcaf12l1	Vps4b
Eya1		Pfn4	2510009E07Rik
Polr3k		A930004D18Rik	Plekha3
Usf3		Lrrc4b	Ptpn2
Rab40b		Arhgap28	Snrpd1
Ccdc117		Mir99ahg	Acbd3
Slc16a10		9330102E08Rik	Ms4a4d
Vamp1		Ifnlr1	Acp2
Mfsd8		C530005A16Rik	Adamtsl3
Mir1966		Mfsd7c	Serpinb9
Snx27		6030408B16Rik	Ythdc1
Ubr1		Cux2	Celf2
Rfesd		Angptl3	Snx4
Ado		Tac1	Impact
Mapk8		Prlr	N6amt1
Vps33a		Mapk4	Xrn2
Ppp2r3c		Abca12	Cryzl1
Otud7b		Rpgr	Cpne1
6030458C11Rik		D330041H03Rik	Svep1
Wdr45b		Gabrr2	Foxp1
Agpat5		Ces2e	Parp1
Litaf		Kpna2	Rab31
Hivep2		Sez6l2	Tvp23b
Trappc2		Ahrr	Ldlrad4
Foxj2		4930486L24Rik	Cmklr1
Cirh1a		Cngb3	Parp8
Lrrc57		Nckap5	Pias1
Tiparp		Nova2	Bnip3l
Parp2		Zfp133-ps	Ncald
8430426J06Rik		Fam124b	Alcam
Trim23		Lect1	Omd
Hars2		Tmem266	Fkrp
Zfp386		Gm6086	Igip
Hook1		Hcn4	B3gnt2
0610010F05Rik		Cntn5	Tmem119
Gm15417		Plag1	Slc30a5
Cdc5l		Opn3	Pde3a
Ercc6l2		D7Ertd443e	Abcf3
Nutf2		4930480K23Rik	Gmfb
Dkc1		Pcdh17	Thbs2
Hmga2-ps1		Zfp783	Maml2
Fam104a		Neurl1b	Morf4l1
Tnfrsf21		Gm14207	Kirrel
Pum1		4930452B06Rik	Sp3
Tmem230		9330159M07Rik	Prps2
Ppat		Mtl5	Rab9
Fbxo45		Gm14057	Foxo1
Acvr1b		Tgtp1	Med6
Sema4d		Gm15328	Fam45a
Tmem199		Gm4956	Meis1
Stim2		Rps6kl1	Apopt1
Chac1		Tnfaip8l1	Twf1
Prkra		Amph	Ctcf
Mpp3		Gm17745	Adamts15
Orc2		Samd12	Pafah1b2
Dhdds		Ptprn	Elf1
Xpo6		Myrfl	Pfdn4
Hcfc2		Ppm1h	Snx14
Rnmt		Rasl10a	Jkamp
Rev1		Srgap1	Lats2
Dcaf5		Mas1	Cttnbp2nl
Chm		Sertm1	Mfsd1
Aven		D830046C22Rik	Atp8b1
Erlin2		Rapgef4	Chst3
Fbxl17		A630077J23Rik	Kmt2e
Pwp1		Zkscan8	Prpf4b
Ier3		Casc1	4833420G17Rik
Gk		Mybpc3	Ggta1
Ipp		Ldhb	Golt1b
Dcun1d1		Acsl1	Tmem45a
Bms1		Popdc2	1110059E24Rik
Klhl8		Gm44502	Gcnt2
Ammecr1l		Hdlbp	Srek1
Armt1		Nnt	Ptbp2
Tmem170b		Atpif1	3632451O06Rik
Sike1		Lgals6	Gfpt2
Btbd6		Aifm1	Ddx46
Napb		Mpv17	Lmbrd1
Zw10		Sh3kbp1	Kif1bp
Mios		Camk2d	Mrpl48
Zfp3		Pgap2	Eif4enif1
Zfp654		Cacna1c	Adam10
Arhgef3		Fdx1	Atp2c1
Znhit3		Tek	Manba
Zdhhc6		Sirt5	Ptpn9
Rfc4		Kyat3	Sh3d19
Gtpbp1		Cenpa	Pabpc4
Dnajc9		Gid8	Sp1
Akirin1		Nadk2	Tmem57
1700123M08Rik		Tmx2	Pole3
Akap7		Med8	Rnf103
Synj2		Map4k3	Kdm1a
Cox16		Tti1	Ccdc59
Cep83		Cyyr1	Tmem136
Egf		Prox1	Dio2
Snupn		Ifi203	Uimc1
Ganc		Slc26a10	Dcaf13
Trim13		Foxk2	Tipin
Usp22		Fgd5	Pip4k2a
A930005H10Rik		Ncoa2	Hacd3
Gtf2h2		Fli1	Epha3
Asf1a		Vti1a	Sult5a1
Neto2		Dgke	Rabif
Abca8b		Ccnt1	Psen1
Stx17		Hmgb3	Lin7c
Psma3		Mir1195	Ppil4
Larp7		Gm21992	Tmem128
Rgp1		Klf12	Id4
Akap9		5830417I10Rik	Glb1
Lyrm1		Gzmm	Scamp1
Ppp4r1		Kcnd3	Itga1
Rpf2		Pik3r6	Prkd3
Kif3c		Klhl4	Sash1
Wdyhv1		Rtp3	Efna5
Appbp2		Ralgps1	Cpne3
Nsd1		Gm15972	Fam188a
Tigd2		Zfand4	Tbc1d7
Yrdc		Cdk6	Nfia
Zbtb44		Med12l	Purb
Gpbp1l1		Mcm8	Rian
Gfer		Ddx60	Rbmx
Mkl2		Anxa13	Yy1
Atg4a		Esr1	Qpct
Bcl10		Thsd7a	Tnrc6a
Ric1		Gm15543	Tspan6
Prmt3		A530058N18Rik	Luzp1
Ilf3		Ndufab1	Kit
Zfp51		Jup	Wipf1
Cdc14a		Sod2	Fam46a
Sap30		Tmbim4	Gnaq
Stxbp4		Slc25a3	Mettl20
Elavl1		Iqsec2	Man2a1
Fam212b		Gtf2i	Ccar1
Sobp		Cct3	Tank
Cep19		Dysf	Wif1
Ormdl1		3110057O12Rik	Mgl2
Rbm45		Atp6v0a1	Mex3c
Pus10		Macf1	Golph3l
Snrpc		Akap6	Tug1
Prdm4		Shank3	Supt16
Dmap1		Pet112	Fam8a1
Trappc12		Sik3	Sema5a
Zdhhc3		Plekhm2	Trappc5
Fam204a		Dnm1l	Mir29b-2
Pter		Stxbp3a	Cdc23
Zfp825		Sec14l1	Xk
Socs6		Igtp	Pqlc3
Asb4		Slc25a34	Smc3
Klhl5		Gpr56	Armcx1
Rabgap1		Ascc1	Rab11b
Ap3s2		Rbms1	Foxp2
Odf2		Vps52	A330023F24Rik
Tmem189		Cep68	Fam76a
Otub2		Nphp1	1110004E09Rik
Prpf4		Ddo	Ube2d-ps
Neu2		Gm14290	Phax
Ppfia1		Cars2	Arsb
Pgm2l1		Tars2	Lrp6
Irf9		Ankrd17	Zfp869
Pskh1		Insr	Zcchc7
Gtf2e1		Slc12a6	Snord47
Nup210		Coq2	H13
Pcna		Gtf3c1	Clec16a
Slc15a5		Rnf213	Hbegf
Zfp120		BC034090	Jag1
Atmin		Myo10	Tmeff2
Pyroxd1		2810055G20Rik	Khdrbs1
Rom1		Wbp11	Rnf20
Twistnb		Cisd2	Ptk2
Parp9		Zkscan3	Itch
Ttl		Arhgef12	Tmem183a
2018-09-10		Mterfd1	Slc12a6
Wdr7		Marf1	Frmd6
Rnf217		Nfib	Tdrd3
Glmn		Gm20619	Bche
Pacs1		Dnajc11	Pdcl
Dusp7		Abhd17b	Ggps1
Zmym6		Sp1	3830406C13Rik
Umad1		Aak1	Man1a2
Gadl1		Il15ra	Ctso
Rev3l		Oxa1l	Tmx3
Spa17		Htatip2	Ncbp1
Mtmr4		Bphl	Lamc3
Spopl		Wdr60	Tyw5
Kmt2a		Gm12002	Uhrf2
Sos1		4930430F08Rik	Usp33
Best3		Cpox	Edem1
Lrp2bp		Ube2e3	Wdfy1
Gpr155		Braf	Mmab
Ndnl2		Baz2b	Atf2
Mbtps2		Ccar1	Akr1c14
Phf7		Fam222b	Ptges3
Unc119b		Plce1	Aff1
Tirap		Kmt2a	B3galt1
Slc30a2		Ttc39b	Tbc1d23
C2cd5		Ankrd32	Shisa3
Parp4		Atg16l1	Snx7
Cog1		2810004N23Rik	Ptpn12
Ccdc32		Cbr4	Crebl2
E2f3		Cmss1	Kcnj15
Wdr70		Eno1	Loxl2
Dpcd		Grb10	Galnt15
Ptx3		Dennd5b	B3gnt9
Ascc2		Gm15800	Enpep
Gcc2		Tnrc6b	Pcnp
Ankrd10		Sgol2	Prrc1
Tulp4		B230369F24Rik	Nmnat1
2310016D03Rik		Tmem116	Lrch3
Pex12		Ankrd10	Hspb11
Rfx7		Csnk2a1	Rbm6
Gm10033		Gm20459	Erap1
3110056K07Rik		Pi4ka	Fcrls
Ctns		Gm12357	Snora70
Znhit6		Zzef1	Hhip
Rfxap		Bcl7c	Vopp1
Rnf170		Bend7	Enpp1
Rfwd2		Pvt1	Ube2w
Leng1		N28178	Chuk
Itga4		Mapk10	Yeats4
Vwa9		Phc3	Agfg1
Rabl3		Rapgef2	Isy1
Lmbr1		Akap13	Mfsd14b
Sec24a		Gm10644	Fam91a1
Lrrc28		Ccdc77	Smndc1
Ifnar1		B230110C06Rik	Gpatch4
Polh		Htt	Dmtf1
Tnrc6c		Frs2	Rgs10
Ing2		Ntmt1	Fam13b
Tada1		Gm11730	Ell2
Zfp612		Gm13594	Tra2b
Wdr12		Osbpl8	1810030O07Rik
Csnk1e		Tmem181b-ps	Peli2
Dennd1b		Dach1	Prrc2c
Slc43a1		Cdh23	Slc37a3
B4galt4		Prkx	Mfsd6
Ttc39b		Zfp235	Mettl10
Nipsnap3b		Nubpl	1600012H06Rik
Sdad1		Gm16046	Lppos
Mlh3		Mphosph9	Bmp6
D17H6S53E		Adam22	Adam17
Gm13490		Prdm10	Eif1a
Daglb		Gm9917	Dse
Rnf113a2		Pou2f1	Smek1
Med31		Prdm1	Fnbp4
Alkbh8		Ttc30a1	Suv420h1
Epg5		Lix1	Cd2ap
Mtrr		Zfp608	Zdhhc20
Rpap2		Gm16181	Stag1
Faim		Usp43	Sin3a
Hmgxb3		Palm2	Brix1
Inpp1		4930458D05Rik	Exoc6b
Etv3		Tnip3	Etnk1
Phlda1		Gm17566	Marf1
Maff		Etnk1	Hspa1b
Mib1			Ccdc82
Map3k1			Ecd
Zfp280b			Papss2
Cyp39a1			Gm19705
2810001G20Rik			Stk3
Tstd2			Wtap
Amer1			Calml4
Gm14325			Smek2
Taf4			Thoc1
Zfp422			Dnajc1
Pik3cb			Zfp110
Gm10560			Zcchc9
Nbas			Kras
Galnt10			Cand1
Rap2a			Snord12
Met			Irf2
1700001O22Rik			Xiap
Fam35a			Atp11b
Pold3			Slc25a24
Lipt2			Tnfrsf11b
Synj1			Epc1
Emid1			Lgi2
Klf7			Ubtd2
Lrtm2			Cluap1
Frat2			Fbxl20
Six2			Gulp1
Gm5860			Gtf2h1
Taf7			Topors
Sec22a			Rhbdd1
1110008L16Rik			Gclc
Pgm1			Plekha2
Ccne2			Cep120
Airn			Cd109
Fnip2			Gnpda2
Irf2bpl			Anapc1
Cep76			Mcts2
Gpatch1			Pbrm1
Ccdc86			9530077C05Rik
Efcab6			Hdac9
Ccl25			Zfp715
Adamts9			Commd10
Zfp961			Skil
Slc2a3			Dync2li1
Cd28			Maoa
Hs3st5			Zmym5
Hoxa11			Kctd12
Fam19a3			Samd9l
L3mbtl2			Dcbld2
Zfp14			Fubp1
Pigw			Ust
Setmar			Myo10
Mre11a			Rfc1
Zfp839			Ptbp3
Hnrnpf			Fam160b1
Zfp142			Cdc40
Lnx1			BC030336
Wdr20			Fndc3a
Lrrc27			Pan3
Ofd1			Slc33a1
Ar			Rgs7bp
A830010M20Rik			Mfap3
Rps25			Spin1
Edrf1			Nfx1
Ccdc159			Golga7
Spice1			Tmem263
Slc36a1			Wac
A830052D11Rik			Angpt4
Vav2			Nmi
Grasp			Prpf38a
Gdf11			Gt
Lnx2			Scaf11
Zfp827			Tmtc2
Cadm1			C1qtnf5
Nsg1			Tnfrsf11a
1190003K10Rik			Hspa13
Ovgp1			Mphosph6
Pdzd7			Rbm8a
Spry4			Map3k5
Megf9			Sap30l
Yeats2			Zfp9
Hoxc9			Btbd10
Tnfrsf23			Rab33b
A930003A15Rik			Ppp1r7
Ifit3b			B3glct
Tfcp2l1			Gas7
Stx3			Zfp358
Exoc8			Ripk1
Zfp759			Caml
Rbm4b			Dusp28
Ube2v1			Mettl21a
Nrbf2			Prkci
Zfp236			Cmip
Ocel1			Casp1
Igfn1			Slc38a11
Asap3			Xpa
Styx			Snord22
Timm23			Tmem168
Fan1			Whsc1l1
Katnal1			Ints8
Hist1h2be			Pigk
Carnmt1			Ocrl
Gm15408			Tsc1
Ikzf2			Atrx
Pwwp2a			Gigyf2
Zranb3			Spata6
Zbtb46			Zrsr1
Slc35g2			Vps26b
Ccdc146			Fam172a
Xntrpc			Dact1
Gm14326			Tbk1
Tti2			Slco2b1
Mc5r			Armc10
Ucn2			Slc7a6os
Ntf5			Ube2d2a
Hoxc11			Pten
Zfhx4			Btc
Dtwd2			Rab2b
Pars2			Bhlhb9
Sp3os			Ero1l
Cabp1			Ipo8
A830082N09Rik			Napg
Kcnf1			Evi5
Mis18a			Rnf38
Tmem132b			Gabpb2
Dixdc1			Btg1
Zfp112			Siae
Tekt1			1110037F02Rik
Psmc3ip			Mrps10
Dchs1			Leo1
Fam19a5			Osmr
Donson			Scaf8
Mesdc1			Paxbp1
Ccdc122			Frs2
Plekha8			Zfp263
Gm5091			Snord99
Nog			Tceal1
8430429K09Rik			Gopc
Kbtbd8			Hdgfrp3
Atp13a5			Socs5
Casr			Adgrd1
Mdn1			Ptprj
Rbm12b1			Clock
Crem			Setd2
Zfp28			Enpp3
Agk			Phf3
Trmo			Taf1b
4933401D09Rik			Ankra2
D430041D05Rik			Mtmr9
Mdm1			2018-09-10
Pld5			Cyp51
4930581F22Rik			Kdm3a
Sft2d1			2810474O19Rik
Cuzd1			Srsf10
Tyw3			Xrcc4
Ube2cbp			Trappc11
5430425K12Rik			Pdgfc
Ss18l1			Ptprd
Gm14295			Dusp12
4931414P19Rik			Nup98
Stab2			Ercc5
C030034I22Rik			Sap18
Zbed4			Pank2
Rmi2			Epc2
Il17d			D6Wsu163e
Gm19299			Tia1
Gm9958			Itsn2
Btbd8			Exoc1
1700008J07Rik			Zfp768
1700113H08Rik			B3galnt1
Eva1a			Asap1
6330410L21Rik			Cd163
Themis3			Fam102b
Gm5111			Rbbp6
Lekr1			Lats1
Zfp558			Ugcg
Gm2176			Gxylt2
Clec2e			Fam81a
4930577N17Rik			Peli1
Zfat			Peak1
Cflar			Cnksr3
Gm12216			Rbpj
Zyg11a			Slc23a2
4930538K18Rik			Zfp281
F2rl3			Bcl2
Prmt6			Rasa1
Ppil6			Triqk
Gdpgp1			Hacd4
Rpusd2			Bptf
Arnt2			Clec14a
Hspa14			Snrnp48
Gen1			Vgll3
Gm10814			Pik3c3
Pifo			Tmem33
Mab21l1			Tbpl1
Map3k15			Gipc2
Apoh			Aida
Fam19a4			Cul4b
Hbs1l			Edn1
Macrod2			Mettl14
Tmie			Hivep1
Tnni2			Dock1
Ugp2			Prpf3
Gyg			Jmjd1c
Sqstm1			Morc3
Asnsd1			Rpl31
Ubr3			Zfp326
Cct6a			U2surp
Clip1			Casp8
Ppp3ca			Chfr
Ide			Trim12a
l7Rn6			Fam124a
Mospd1			Gapvd1
Sms			Smarce1
Zranb1			Heatr5a
G3bp2			Acap2
Metap2			Dock10
Pde4d			Rnf24
Pfkfb1			Magohb
Chtop			S100pbp
Ap1s2			Nasp
Amot			Zfp317
Khdrbs3			Bmpr1b
Polr3gl			Pld1
Tmem87a			Fut11
Cpeb4			Prickle1
Usp15			Iqcb1
Msl3			Meis2
Rps6ka3			Ttc23
Mia3			Tmem29
Rabep1			Ick
Adal			Adamts5
Eif3j2			Luc7l
Tm2d1			Crebzf
Osbpl6			Kdm4c
Tlk2			Col16a1
Polr2d			Nr2c2
3300002P13Rik			Zfc3h1
Nphp1			Kat6a
Pus3			Ctps2
Gtdc1			Ppig
Zfp652			Adgre1
Gm12669			Zfp410
Cnot11			Yipf6
Adcy9			Gnptab
Lig3			Layn
Dido1			Arid4b
Sema4c			Casp4
Xpo7			Rab3gap2
Msh3			Nsrp1
Aurka			Dsel
Ccnyl1			Tmem68
Apex2			Atxn1l
AI506816			Zeb2
Il12a			Egfr
Atp2b3			Olfr1033
Zscan29			Tshz2
Tma16			Ap3m1
Mtcp1			Snord19
Prkcg			Aldh1a3
Coil			Tspyl4
Nrde2			Zfp948
Cstf2			Rrp8
Lin9			Tmpo
Hist1h1e			Vamp4
4930556M19Rik			Rcor1
Cep135			Abcb6
Eqtn			Slc39a6
Zfp879			Bmt2
Eef2			Cep57
Neb			Arl13b
Ipo7			Zfp426
Lsm14a			Rpa3
Srsf2			Dnajc25
Mkks			Fer
Csnk1a1			Dstyk
Rabl6			Slc35a5
Fam96a			Rab23
Arhgef6			Vhl
Trpc4ap			Nipal2
Ndel1			Zfp810
Msl1			Ufm1
Ist1			Nipbl
Nisch			Spty2d1
Maea			Fmo5
Gm26740			Stam2
Zfp191			Zfp60
Rmnd1			Sde2
Micall1			Bdh2
Lnp			2610301B20Rik
Gm21967			Cnrip1
Wbp11			Zfp354c
2510003E04Rik			Smchd1
Zdhhc16			Cc2d2a
Kctd9			Pspc1
2700029M09Rik			Hmgxb4
1110057K04Rik			Chic2
Tmem131			Pde1a
Lypla1			Mbip
Pcnx			Fat4
Jhdm1d			Gm17066
Strip1			Krit1
Tm9sf4			Fbxo25
Gm608			Jazf1
Rbm6			Pphln1
Setx			Bbs5
Pkn2			Zfp704
Nmd3			E2f5
Fra10ac1			Emsy
Gpd2			Recql
D19Ertd737e			Zfp280d
Fastkd3			Zfp266
Dnajc14			Nom1
Ccnl2			1500015O10Rik
St13			Cpsf6
1700052N19Rik			Pcf11
Gga3			Hnrnpa1
Rbm33			Ror1
Mrps15			Zzz3
Slc25a27			Coa7
D230025D16Rik			Zfp938
Ccdc41			S1pr2
Xpo5			Zc3h13
Med17			Tbp
Cpsf3			Mis12
B3galnt2			Tiprl
Brd1			Ttc8
Dicer1			Abhd13
Pds5b			Tmem209
Ccdc132			Senp5
Nfatc3			Hnrnpa3
Lyar			Rrp15
Mink1			Fam76b
Hira			Eif2ak3
Gm16039			Cpz
Map2k5			Smad1
Rprd2			Pik3r3
Taf4a			Zfp365
Gm15756			Fgf2
Tmem33			Phc3
Cnot1			Tbl1xr1
Gm15510			Wnt5a
Thumpd3			Kdm5b
Wwp2			Suco
Jmjd6			Gm20257
Abcd1			Slc16a7
Dtymk			Mitd1
Ubn1			Ylpm1
Parg			Stam
Mettl3			Zmat1
Ogfod1			Tsr2
Angel2			Nipa1
9130011E15Rik			Snord72
Mkrn1			Snapc1
Cog2			Dennd6a
Acox3			Arl14ep
Cpsf6			Prim1
Msh2			Crebrf
Afg3l1			Qtrtd1
Hnrnpk			Setbp1
Rnf31			Rlim
Csnk2a2			Dgcr8
Ascc1			Magee1
Ccdc73			Spred1
Phf11d			Dpy19l1
Gripap1			Mettl6
Dennd4c			Mpp7
Eef1d			Mecom
Vps13d			Snora33
Vipas39			Manea
2810055G20Rik			Hoxb2
Srbd1			Cdkn2aip
Atg2b			Scn7a
Fgfr1op			Ddx58
C030046E11Rik			Rsbn1l
Ggact			Braf
Cdc16			Klhl20
Ccdc88c			Mdfic
Alg9			Mpv17l
Nup188			Zfp866
Sun1			Gpkow
Usp45			Smc4
Dctn4			Riok1
Rbm3			Fam120b
B3gat3			Atrn
Kptn			Creb1
Ap5m1			Zdhhc13
BC042782			Snx12
Cradd			Diaph2
I830012O16Rik			Vipr2
Gm11458			Dnaja1
2410127L17Rik			Lrrcc1
Htt			Pigh
Rttn			Smarcc1
Gm20517			Lysmd3
Atg16l1			Ifit2
Exoc5			Fam208a
Wdr60			D10Wsu102e
Ap4e1			Tubgcp5
Zfyve26			Pgf
1700028K03Rik			Slc11a2
9330159M07Rik			Ift57
5830415F09Rik			Fam107a
Hectd2			Plscr4
Aph1a			Cstf3
Vps53			1300002E11Rik
Rangap1			Dock11
Zfp622			Erlin1
Shprh			Clec10a
Zc3h12a			Camsap2
Minpp1			Zfp322a
Mief1			Hoxb7
4921513D11Rik			Fpgt
Ikbkb			Orc6
Zfp446			Pdzd8
Bcl7a			Rab7b
Scaf4			Wdr3
Micall2			Apobec1
Mtmr10			Sirt1
Gm9949			Isg20l2
Rft1			Chmp4c
Gm7008			Foxf1
Coro7			Gdap2
Whsc1l1			Nfkbiz
1700112E06Rik			Dnal1
Rictor			Pard3
Gm10767			Uxs1
Zfp783			Rnf168
BC053749			Ythdf2
Gm16529			Zbtb1
C330018A13Rik			Mirlet7d
Cep152			Gldn
Gm4665			Prkx
Btf3l4			Zfp160
Amd-ps3			Uhrf1bp1
			Lipo3
			Smim10l1
			Xpot
			Cpb1
			Brox
			Papd5
			Gmcl1
			Smc5
			Tmem237
			Rspry1
			Zfp871
			Myef2
			Ncoa7
			Usp32
			Taf2
			Rpl10
			Thoc2
			Rlf
			Utp18
			Kdsr
			Med23
			Slc35b3
			Ssbp2
			Pdcd10
			Hnrnpr
			Sec16b
			Dtx4
			Ankrd44
			Ripk2
			Nt5dc1
			Gja6
			A230046K03Rik
			Rbm27
			Nalcn
			Cdk13
			Wdr47
			Rapgef6
			Ric3
			Trip4
			Cenpc1
			Rab8b
			Npm3
			Arid4a
			Cd209f
			Hoxa2
			Inpp5f
			Gorab
			Mir7079
			Lrrc58
			AU022252
			Igsf10
			Hltf
			Zfp568
			D030056L22Rik
			U2af1
			Hps3
			Sgms2
			Mapk1ip1l
			Csgalnact1
			Katnbl1
			Dleu2
			Gria4
			Klf11
			Mettl2
			Dennd4a
			Ppm1d
			Plcb1
			Gm10046
			Col4a3
			Gprasp2
			Ccdc174
			Btbd7
			Folh1
			Arsk
			Zc4h2
			Rnf111
			Atxn3
			Rab32
			Tbc1d12
			Ddx28
			Twist1
			Tbc1d8b
			Fmnl2
			Pipox
			Slbp
			Nip7
			Ubxn7
			Mynn
			Fbxo33
			Trmt10b
			Aknad1
			Dancr
			Bbs9
			Zmym4
			Trdmt1
			Gabpb1
			Chd1
			Fam19a1
			Cdk7
			Rasal2
			Lrrc61
			Selp
			Fam46c
			Elk1
			Snai2
			Lztfl1
			Csnk1g3
			Pcnx4
			Klhl42
			Creb5
			Smarcad1
			Nectin3
			Rngtt
			Nup205
			Myo9a
			Zfp623
			Casp3
			Dbr1
			Tmed8
			Ubxn8
			Ing3
			Zfp449
			Pcp4
			Scyl3
			Ly96
			Ldb2
			Serpinb8
			Fam133b
			Tmtc3
			Map3k8
			Sema3a
			Akap10
			Slc4a7
			Hmbox1
			Nup54
			Pik3c2a
			Ankib1
			Arid2
			Vwc2
			Med17
			Adamtsl2
			Hoxb3
			Snord69
			Mir1839
			Cdk8
			Kalrn
			Mier3
			Rbm12
			Zfp148
			Rasa2
			Fam84a
			Mcm4
			Slc36a4
			Slc30a1
			Chd9
			Chp2
			Msh6
			Dgkg
			R3hcc1l
			Eif2ak2
			Kcnip4
			Glcci1
			Rprd2
			Pi4k2b
			N4bp2l2
			Ncbp3
			Pramef8
			Zkscan1
			Zfp58
			Efl1
			Zfp952
			Mfap1a
			Lrp12
			Zfx
			Zfyve16
			Trmt61b
			9230112J17Rik
			Tagap1
			4930417O22Rik
			Slc35d1
			Avpr1a
			Lepr
			Pacrgl
			Mir7-1
			Zfp74
			Dph6
			Swt1
			Trim21
			Snx25
			Tmem62
			Mir7026
			Tenm3
			4930503L19Rik
			2310035C23Rik
			A830080D01Rik
			Senp7
			Irak3
			Wdr5b
			6330416G13Rik
			Jrkl
			Dubr
			Dtwd1
			Ccdc71l
			Zfp87
			Map3k2
			Scaper
			Phf8
			Myo5c
			1500009L16Rik
			Ccdc93
			Gtf2a1
			Cdyl
			Phip
			Pigf
			Zfp868
			Pard3b
			Arhgap6
			Col6a6
			Zfp420
			Zbtb33
			Terf1
			Cask
			Hs3st1
			Zfp790
			Slc35a3
			Ccdc127
			Fam126b
			Bbx
			Zfp932
			Slc25a40
			Smad9
			Nr2c1
			Slc10a7
			Rnu73b
			Bivm
			Rps6
			Zfhx3
			Ifit3
			Snord73a
			Slc30a7
			Mysm1
			Nhsl2
			Zfp954
			Kdm5a
			Ptgs2
			2810002D19Rik
			Cd300ld
			Tcea1
			Irak1bp1
			Crispld1
			Faxc
			Pbdc1
			Noc3l
			Alg11
			Agtr1b
			Eid2
			Cntln
			Ift88
			Gcnt1
			Kctd18
			Rad50
			Cep41
			Asb18
			Slc41a2
			Tmem260
			Papolg
			Ahi1
			Ppm1e
			Slc2a13
			Naf1
			Plekhh2
			Ankrd29
			Tmem158
			Pex5l
			Fam206a
			Tnfsf13b
			Zfp719
			P2rx7
			Poc5
			Dnph1
			Invs
			Mbtd1
			Rsbn1
			Trim37
			Fgd6
			Cspp1
			Prim2
			Kdm5d
			Lancl3
			Arap2
			Trim33
			Rdh10
			Aph1b
			Dopey1
			Papd4
			Wdpcp
			Zfp935
			Rbak
			1110059G10Rik
			Ttf1
			Lrig2
			Tlr2
			Lsm1
			Dnm3os
			Cdk12
			Hace1
			Fam149a
			B130024G19Rik
			Map7d2
			Trim12c
			Slc4a10
			Polr2l
			Hoxc8
			Atp11c
			Srbd1
			Nf1
			Gnpnat1
			Fam117b
			Topbp1
			Ikzf5
			Zfp760
			Prickle2
			Rsf1
			Ubxn2b
			Cdkl2
			Tifa
			Dennd5b
			Kbtbd7
			A230072C01Rik
			Ppwd1
			Rnf219
			Wrn
			Shprh
			Trub1
			Ccdc34
			Csnk1g1
			Trove2
			Sntb2
			Acan
			Spata7
			Zmat3
			Fam208b
			Zfp472
			Akap17b
			Ddx18
			Taf3
			Adra2a
			4632415L05Rik
			Trim2
			Snord57
			Capza1
			Chsy3
			1700094D03Rik
			D16Ertd472e
			Avl9
			Ice2
			Lrrk2
			Ccdc126
			Zfp867
			Snora75
			Rpf1
			Socs4
			Dock5
			Arl15
			Ankrd12
			Mplkip
			Heatr1
			Trmt13
			Rgs1
			Asb7
			Rap2b
			Ly75
			Pcdhb17
			Zfp105
			AA414768
			Zfp292
			Ints6
			Rbbp8
			Adamts6
			Zfp84
			Slc29a3
			Snora41
			Ccdc88a
			Spidr
			Zfp945
			Trpc1
			Phf11d
			Zfp40
			Zfp182
			Pot1b
			Nup160
			Fbxl14
			Mir6992
			Dgkb
			Ccbe1
			Chn2
			Zfp846
			Zfp772
			Tusc1
			Wee1
			Ftx
			Cdkl5
			Fkbp1b
			Gspt2
			Cep57l1
			Armcx3
			Bbs12
			Tanc2
			Tshz3
			Zfp983
			Slc9a9
			Sp140
			Stxbp5
			Eif5a2
			Rhebl1
			Npat
			Zrsr2
			Gm16973
			Fam103a1
			Vtcn1
			Ereg
			Rpl17
			Ccdc112
			Rbm12b2
			Ino80d
			Uvssa
			Gbgt1
			D3Ertd254e
			Tle1
			Rufy2
			Zfp53
			Pigm
			Pde6h
			Adamts14
			Fam151b
			Shc2
			Zfp800
			Ndp
			Adamtsl1
			Nat2
			Slc35d2
			Cdk5rap2
			Tpmt
			Ism1
			Cpne8
			Ints2
			Ttc26
			Rarres1
			Thap1
			Mthfs
			Zfp729b
			Ttbk2
			Zfp157
			Nepro
			Zfp597
			Mmp9
			Zfp329
			Uggt2
			Arntl2
			Rpl9
			Primpol
			Pola1
			Nbeal1
			2610524H06Rik
			Zfp287
			Ppp1r36
			Zbtb10
			DQ267102
			Aass
			Gramd1c
			Anapc10
			Kantr
			Gprc5a
			Gxylt1
			Zfp763
			Caap1
			Vps13b
			Cep70
			Sec22c
			Slc25a43
			Msl3l2
			Zfp65
			Slc9b2
			Uba6
			Zfp39
			3110056K07Rik
			Zfp955a
			Nkrf
			Etaa1
			Whsc1
			Trim36
			Lrrc16a
			Gpr39
			Zkscan8
			Lsamp
			Slc38a9
			Zfp677
			Ankrd45
			Tspyl5
			Frk
			Slc38a6
			Htr2a
			Lyst
			Runx1t1
			AW554918
			Utp23
			Zfp248
			Atr
			Lrch2
			Ccdc109b
			Gm6634
			Ccdc60
			Zc3hav1l
			Dclre1c
			Eri1
			Zfp318
			Cdh6
			Fam198a
			Eri2
			Gm15663
			Sgip1
			Tmem221
			Snord87
			Gm10509
			Mir7061
			Hoxb9
			Smpdl3b
			Ear2
			Ccp110
			Mad2l1
			Cep78
			Dnajb6
			Col19a1
			4933421O10Rik
			Dzip3
			Gm24148
			Uevld
			Cachd1
			Mettl25
			Dcaf17
			Zfp518b
			Pign
			Zfp438
			Mir196a-1
			Cst6
			Tasp1
			Egr3
			Snora81
			Il17rd
			Apaf1
			Simc1
			Tmem170
			Bex4
			Gcfc2
			Tmem194
			Cdh18
			9130008F23Rik
			Bmp2
			Hoxd4
			Agbl3
			Chml
			9130023H24Rik
			Zbtb24
			Zfp334
			Nptx2
			Ercc6
			Zfp81
			Pdik1l
			Cd209g
			Col8a2
			Rnf145
			A430033K04Rik
			Pcdh18
			Zfp748
			Bicd1
			Mthfd2l
			Prr5l
			Btf3l4
			D630003M21Rik
			Wdr19
			Zfp111
			Pikfyve
			Zfp113
			Mblac2
			Aplf
			G2e3
			Pcdhb14
			Taf5
			Phex
			Cep112
			Gpr21
			Gpr137b
			Nxph1
[truncated: 690 more rows]
