# Supplementary material for: Transcriptional profiling reveals extraordinary diversity among skeletal muscle tissues
Source: eLife journal article supplement (doi:10.7554/elife.34613), 2018-05-29
Supplement: supp [file elife-34613-supp-v1.zip › elife_poa_e34613_Supplementary_file_5.xlsx]

## Sheet: Sheet1
Diaphragm	FDB	EYE	Gastrocnemius	Masseter	Soleus	Tongue
Pax3	Fhl1	BC030499	Amd1	1700016C15Rik	Tnnt1	Ltf
Gm5420	Car3	Rufy3	Pitpna	Lrrc8b	Myh7	Capg
Foxg1	Neat1	Ache	F830016B08Rik	F8	Tpm3	Klk10
Serpinb1c	Pdlim3	Plp1	Cdk19	Foxl2os	Ppp1r27	Rps8
Sv2c	Lmod2	Nsg2	Gm4841	Dmp1	Ankrd2	Aqp3
1700108F19Rik	S100a4	Shroom2	Enox2	Hsd17b14	Rcan1	Qars
Lgals2	Myl6b	Nnat	Rasd2	Mir6409	Pla2g12a	Krt23
Mchr1	Mustn1	Gdnf	Nek6	Trpm1	3425401B19Rik	Blmh
Hoxc5	Fmod	Tspan33	Hoxd9	Arx	Lmod3	Ckmt1
Upk1b	Uaca	Adamtsl4	Hoxd10	Tle4	Amotl1	Mrpl52
2410137M14Rik	Ctxn3	Abca4	Cdh4	B3gat1	Bnip3	Serpinb11
Dpp4	Myom3	Alx4	Slx4ip	Lhx2	Alpk3	Klk14
Lrrn4	Atcayos	Epyc	Tmem232	Ccdc162	Bdh1	Rab24
Shox2	Lmcd1	Edn3	Amd2	Tmem132b	St3gal5	Eif6
Ddah1	Myoc	Gabrd	Hoxd8	Gm216	Tead1	Adh7
Mpdz	Psmb4	Kcna2	Amd-ps4		Ipo5	Capns2
Rspo1	Emp1	Kcnu1			Apol6	Pdzk1ip1
Cda	Thbs4	Ascl1			Dusp18	Rpl37
Abcb1b	Aspn	Mpz			Cdv3	2300002M23Rik
Mmrn1	Anxa7	Myf5			Ppm1b	Sprr1b
Rgs9bp	Angptl7	Nefm			Dffa	Pinlyp
Bnc1	Net1	Map2k1			Ppp1r1a	Col17a1
Star	Slc38a2	Rab4a			Mreg	Tacstd2
Gpm6a	Prg4	Stim1			Homer2	Gjb2
Adgrg3	Xirp1	Th			Klhl34	Rbp2
Rhou	Cilp	Tpd52l1			Esrrg	Crnn
Olfr1372-ps1	Cct2	Abcg1			Ttc7b	Serpinb3c
BB123696	Coch	Colq			Fzd9	Ces2g
Col6a5	Limch1	Cryz			Fnip1	Nhp2
3110039M20Rik	Lrrn1	Drp2			Dhx32	Avpi1
Gpr97	Tnfrsf12a	Lgr5			Zfp770	Crabp2
Pcnxl2	Uchl1	Gart			Gzf1	Barx2
	Cirbp	Gngt1			Mtfr1	Lad1
	Angptl2	Igfbp5			Slco5a1	Mgst2
	Utp11l	Inha			Hspa1l	Pkp3
	Mybph	Kcna1			Ric8b	Alox12b
	Atf3	Mag			Pde8a	Rpl36al
	Acsl6	Cma1			6430548M08Rik	Lce1d
	Ufd1l	Tpsb2			Tnik	Chit1
	Psmd13	Nppc			Slc43a2	Snrpe
	Chrnb1	Pou3f1			Xpo4	Cdpf1
	Chrne	Ptpre			Nlrc3	Cdsn
	Chrna1	Reln			Pdcd7	Sdc1
	Slc6a6	Rgs16			Dkk2	Tgm1
	Ttc9	Frzb			D630024D03Rik	Lce1a1
	Enpp2	Sox10			Smcr8	Krtap3-3
	Atxn10	Sox9			Ipmk	Dsc3
	Snhg3	Ugt8a			Lgi1	Rpl13
	Sh3rf2	Wfs1			Six4	Lce1a2
	Filip1	Ybx1			Gbp6	Lce1b
	Nes	Zim1			Ctf1	Fgfbp1
	Mir22hg	Adam23			4933415F23Rik	Cd44
	Rsc1a1	Spry1			1110020A21Rik	Cdh1
	Trafd1	Ubl3			Cth	Arg1
	Ppfibp1	Ahr			Gm20735	2610528A11Rik
	Mir22	Epb41l4a			Zfp462	G3bp1
	Cdk11b	Kcna6			4930556G01Rik	Elovl4
	Eda2r	St8sia5			A730036I17Rik	Dynap
	Otulin	Zfp385a			4930511M06Rik	Zfp703
	Ddi2	Chrna4			A330074K22Rik	Ppl
	Chad	Crym			Dach2	Slurp1
	Ssu72	Cldn1			Zp2	Gadd45g
	Srxn1	Srcin1			Cxcl11	Klf4
	Lama2	Prx			Slc9a7	Mir7014
	Gnl2	Fmn2			En1	Rdh12
	Fam214a	Tspan7			Mir208b	Klk8
	Cry2	Arl3			Slc9a4	Hpgd
	Fndc1	Vapb			Ttc41	Cbr3
	Lyve1	Fabp7			A230009B12Rik	Pycard
	Arnt	Nova1			Catsper4	Pir
	Nt5c2	Tslp			Emx2	Clic3
	Acot9	Pcbp4			Tecta	Dsg1a
	Map1a	Chrnd			Spink11	Mapk13
	Snhg5	Fxyd6			4921536K21Rik	Tmprss11a
	Agrp	Esm1			F2	Ralbp1
	Spp1	Col26a1			Tnni1	Psat1
	Acvr1	Gng11			Vgll2	Crabp1
	Thbs1	Serpinb1a			Zdhhc23	Plekhn1
	Fam214b	Susd3			Csn1s2b	2410006H16Rik
	Musk	Grtp1			Actn2	Gadd45a
	Comp	Gatm			Ube2g2	Il1f6
	Riok2	Cmtm5			2310016D23Rik	Rpl6
	Fam168a	Polr2g			Itgb6	Htatip2
	Chodl	Tmem86a			Pde7b	Sytl1
	Rab3gap1	Tmem178			Tsnax	Trp63
	Fam21	2310002L09Rik			Gm17546	Aox4
	Ftsj3	Enho			2310014F06Rik	Sppl3
	Tmem131	Ufsp1			Gbp10	Lce1k
	Pop4	Cpm			Nob1	Fam57a
	Evi2a	3830403N18Rik			Tmc7	Endou
	Uhrf1bp1l	Rasgef1a			6230400D17Rik	Ces1b
	Zfp52	Amtn			Alox12	Limk2
	Gna13	Arhgap42			BC030307	Car12
	Ptpn21	2700097O09Rik				Serpina9
	Gsr	Col20a1				Ppfibp2
	1700011I03Rik	Rasgef1c				Ebp
	Smad5	Lvrn				Zfp692
	Mycbp2	Tdrd9				Prom2
	Nop56	Prdm8				Tmem54
	2310015A10Rik	Dhx58				Sptssb
	Ccdc136	Atf5				Dusp14
	Psma5	Tmprss5				Lce1c
	Dusp6	Myog				Spink5
	Sv2b	Snurf				Prr32
	Srfbp1	Cnnm4				Wnt4
	Lrrn4cl	Lmx1a				Aloxe3
	Ciao1	Osr2				Teddm3
	Kcne1l	Gjc3				Sdr16c5
	Lpar1	Kcnn2				Ppp1r14b
	5031425E22Rik	Ces1e				4833423E24Rik
	Arrdc4	Gpr37l1				Eps8l2
	Ankra2	Syt17				Kprp
	Utp14a	Smim11				Rpl37a
	Rps6ka5	Cabp7				2310034C09Rik
	Tet2	Slc6a13				Fgf7
	Rpia	Stxbp6				Rangap1
	B3galt2	Lgi4				Krt10
	Snhg4	Spsb4				2310050C09Rik
	Lysmd2	Ggact				Vav3
	Fxyd7	Cnst				Nectin4
	Tomm20	Dync1li1				Lce1i
	Traf3	Plekha4				Irf6
	Bbox1	Egfl8				Klk13
	Nrip1	Gjd4				Lce1f
	Etv5	Hist1h4h				Gclm
	Nr3c2	Col23a1				Car13
	Trib1	Igsf11				Aldh3b2
	Bmp5	Ppp2r2c				Bnipl
	Kcnn3	Fam132b				Snrnp25
	Spry2	Dleu7				Sh2d4a
	Pthlh	Cfap100				1110038B12Rik
	Cntnap2	Helt				Pla2g4f
	Gpalpp1	Slc41a1				Thop1
	Nup98	Cdh22				Lce3d
	Airn	Dnaic1				Sult2b1
	Sestd1	Fzd10				Tmem40
	Farp1	Fam228b				Grhl3
	Trmt6	Snhg11				Rcc2
	Mir27a	D830030K20Rik				Ndufa4l2
	Siah1a	Itgb8				Nccrp1
	Slc22a4	Gm4861				Katna1
	Flrt2	Cfap74				Pax9
	Pus7	Lhfpl4				Tubb2a
	Zxdc	Zfp385c				Mall
	Mb21d2	Fa2h				Slurp2
	Armcx5	Rgmb				Grhl1
	Tiam2	Slc35f1				Vsig8
	Ino80	Prrg4				Spint1
	Nasp	Agbl2				Acsbg1
	Ccl9	Hs3st3a1				Hebp2
	Scg3	Plekhh1				Slc25a37
	Col24a1	Plk5				Mal2
	Nav3	Morn4				Ptprf
	Polr3e	Shc4				Fam46b
	1110046J04Rik	Eif4ebp3				Rapgefl1
	Usp6nl	Gm5643				Rps15a
	Col9a1	Snhg14				Serpinb3b
	Cadm3	5930412G12Rik				Cpsf3l
	Spata24	Map2k3os				Kctd1
	Zc3h6	Rmst				Lce1l
	Clec3a	AI450353				Zfp185
	Zc3h10	B230206H07Rik				Pof1b
	Hoxa11os	Mkln1os				Krtap13-1
	Ackr1	4930598F16Rik				Bglap3
	Efhc2	1700027J07Rik				Scel
	Pmaip1	Gm2115				Slc9a3r1
	Mir1a-1	6030407O03Rik				Apcdd1
	Epc1	Gm14827				Moxd1
	Zic1	2310002D06Rik				Tmprss13
	2810032G03Rik	Gm20757				Iffo2
	Cdkl3	C130021I20Rik				Porcn
	Cdhr3	Mir6923				Gsdma
	1500012K07Rik	Gm7788				Evpl
	Tmod2	Atp8a2				Dst
	Fam171b	Stard9				Krtap3-1
	Fbxo36	Ccnt2				Baiap2
	Katnal2	Cacna2d4				Defb14
	Mir23a	Epb4.1l4a				2310079G19Rik
	Platr14	Gm16201				Ovol1
	Impdh2	Vwa3b				Reep4
	Runx1	Prex1				Krt80
	Hottip	Gm2897				S100a7a
	S100a5	Ccdc37				AI413582
	C3ar1	Gm3636				Rassf7
	5930430L01Rik	Tada1				Rab26os
	Clca4a	Cyp2j9				Lipm
	Srrm4os	Gm17484				Metrnl
	Ssc5d	Gm3468				Ap1m2
	Gas2	2010015L04Rik				Defa-ps12
	Gm14005	2610034M16Rik				Tgif1
	Adamts20	F730043M19Rik				Epb41l4b
	Cd33	4833403I15Rik				Acer1
	Suv39h1	Pde11a				Lce1g
	BC020402	F630040K05Rik				Mocos
	4930539J05Rik	Gm8206				Lce1j
	Scn3b					Fam83g
	6720468P15Rik					Cyp2s1
	Opn1mw					Zfp750
	Helb					Wfdc5
	Snhg10					Tbc1d14
	Dpy19l3					Rell1
	Pmp2					Cnot9
	Iqgap2					Slc7a5
	P2ry12					Krtap13
	1500015A07Rik					Dbil5
	Dtl					Cldn4
	Gmeb1					Anxa9
	Osbpl10					Trex2
	Med9os					2310061N02Rik
	Itga11					Fgfr3
	Gm38407					Mtmr10
	Nkd2					Lce1e
	Scx					Tmprss11d
	Ptx4					Plek2
	Lair1					Krt32
	Tal2					Polr3g
	B4galnt3					Cers3
	Slc6a18					Itgb4
	Ccr1					Kctd5
	Klhl29					Tns4
	Gm2694					Ly6g6e
	C1ql3					Nmu
	Ttll11					Tmprss4
	1500011B03Rik					Sp6
	C920009B18Rik					Rnf149
	Ppfia4					Ajuba
	F2rl1					Gjb6
	Orai2					Pard6g
	Clec5a					Serpinb2
	Akain1					Klf5
	Has2					Ace2
	Fbxl13					Prss8
	Larp6					Nrarp
	St8sia2					Il1f5
	Nrip3					Dnase1l2
	Particl					Defb6
	Cntnap4					Rab38
	Lmln					Bpifc
	Mir24-2					Defb3
	Nkain2					Sh3bgrl2
	Hoxd13					Cpa4
	Nxpe3					Bok
	Col28a1					Tiam1
	2610016A17Rik					Dlx3
	Edar					H2afj
	Hoga1					Esrp2
	Mfsd2b					Wnk4
	Acoxl					Csta1
	Olfr920					Epb41l4aos
	Gm14634					Crip3
	Gm4792					Ube2c
	Nudt10					Lce1h
	Mctp1					Ormdl2
	Maml3					Gdpd3
	Ispd					Snord52
	Serpine3					Klk12
	4933406C10Rik					Prss27
	Prph					Cdca7
	Tmem202					Urah
	Areg					St14
	Serpina3m					Tprg
	Gnal					Gar1
	BC031361					Aim1
	Nol4					C77080
	Islr2					Rps6ka1
	Apod					Tbc1d8
	Cast					Efna3
	Aebp2					Sdcbp2
	Cdon					Tcaf2
	Rab13					Pafah1b3
	Cd68					Dedd2
	Rbm3					Rcc1
	Dido1					Epha1
	Card14					Ankrd35
	Fst					Cdca3
	Hoxa13					Klk7
	Gpr34					Otop3
	Nrn1l					Gsdmc
	Lilr4b					AA986860
	Dnm1					Sox15
	Hs6st2					Ptrh1
	Tppp2					Serpinb10
	Adgrg2					Rpp38
	Dfna5					Tmem154
	Dpep2					Itpkc
	Kcnq2					Rnase1
						Ephx3
						Sox2
						Lsr
						Defb1
						Nectin1
						Il1f9
						Klc3
						Cptp
						Duox1
						Elovl7
						Gsta2
						BC064078
						Eya2
						Nipal4
						Il20rb
						Krt35
						Birc5
						2310007B03Rik
						Foxa1
						Fam167a
						Scnn1a
						Lypd6b
						Lmnb1
						Fam110a
						Rhov
						Dennd2d
						Rnf208
						Atp6v1c2
						Nkpd1
						Afap1l2
						Chil4
						Pla2g4b
						Tmem125
						Prr9
						Ephb6
						Chl1
						Il1rn
						Top2a
						Pitx1
						Dsg3
						Sptbn2
						Fam83h
						AI661453
						Ccdc64b
						Ankrd22
						Dennd2c
						Ttc39c
						Fabp6
						Insl6
						Ano9
						Hook2
						Cdc42bpg
						Bspry
						Ccna2
						Lpcat2
						Grhl2
						Gdpd2
						Samd10
						Ccnb2
						Tgm5
						Snord83b
						Fut2
						Ripk4
						1810019D21Rik
						Krtcap3
						Mdfi
						Sdr42e1
						Ptpn13
						Ltb4r1
						Sostdc1
						Slc5a1
						Tubb3
						Rhbg
						Epn3
						Tmem184a
						Il1r2
						Lamc2
						Acp7
						Tfap2c
						Cln8
						Foxq1
						Zbtb7c
						Camsap3
						Mki67
						2010109I03Rik
						Wnt7b
						Gm38426
						Vcpkmt
						Arhgef4
						Ggt6
						Rpl19
						Gjb4
						Cxcl17
						2610528J11Rik
						Celsr2
						Otop2
						Slc10a6
						Pak4
						Ptges
						Dsg1b
						Gm1110
						Plk3
						Psca
						Rpl11
						E2f8
						Rnf225
						Ckap2l
						Ezh2
						Snhg15
						Epgn
						Sdr16c6
						Pla2g4d
						Fam83f
						Clca2
						Crisp3
						Cldn17
						Rnf39
						Slc6a19
						Ptk7
						Mir147
						Nuak2
						Col7a1
						Ttc22
						Ackr4
						Ifi202b
						Hrnr
						Ephx4
						Itpr3
						Il1f8
						Cblc
						Il34
						Grb7
						Prc1
						Has3
						Xpnpep2
						Padi1
						Stx19
						Rassf10
						Tacc3
						Elf3
						Ptn
						Foxf2
						Pla2g2f
						Cdca8
						Gjb3
						Klk9
						Sdr9c7
						Slc46a2
						Aim1l
						Bmp7
						Entpd3
						Trps1
						Cldn8
						Hsd17b2
						Sprr2k
						Tk1
						Cdc20
						Cdkn3
						1810032O08Rik
						Tprn
						Efna4
						Paqr5
						Slc16a13
						Wnt10a
						Btbd19
						Adgrf4
						Chd3os
						Gm3776
						Mfsd2a
						Tmem30b
						Lhfpl1
						H60c
						L1cam
						Il1rl2
						Gna15
						Stfa3
						Sh3yl1
						Smpd3
						5730559C18Rik
						Slc52a3
						Ccdc120
						C130079G13Rik
						Btbd11
						Idi2
						Arg2
						Lockd
						Cdk1
						9930012K11Rik
						Cacna1a
						Map2
						Gjb5
						Elmod1
						Lypd5
						Rpsa
						Psors1c2
						Vsnl1
						Rab11fip1
						Slc22a18
						Crb3
						Fhdc1
						Pla2g3
						Plekhg6
						Klrg2
						Epb41l5
						Tmprss2
						Racgap1
						Serpinb7
						Rnase2b
						Capsl
						Cwh43
						Krt34
						Ckap2
						Phgdh
						Trpv4
						Nusap1
						Knstrn
						Hpdl
						Spc25
						Cgn
						Fndc9
						Zfp503
						Srd5a1
						Tmem45a2
						Bcl11b
						Mroh6
						Gm14137
						Cpn1
						Gsta1
						Arhgap40
						Zfp282
						Fam83c
						Kif23
						Foxn1
						Celsr1
						Dkkl1
						2310034O05Rik
						Msx2
						Krt83
						Tchhl1
						Tgm7
						Ly6k
						Fat2
						Kazn
						AW551984
						Xkrx
						S1pr5
						Spink7
						Tnk1
						2810417H13Rik
						Gm11938
						Vip
						Kcnk7
						Tmprss11b
						Mpzl3
						Runx2
						Esyt3
						2310057N15Rik
						Aadacl2
						Kif11
						Dbf4
						Nkx2-3
						Cbx2
						Kdf1
						Ppfia3
						Ass1
						Bub1b
						Wdr62
						Psrc1
						Spag1
						Lrrc8e
						Mst1
						Macc1
						Exph5
						Tubb2b
						Adam8
						Kif20a
						Sgpp2
						Dlk2
						Ppih
						Vstm5
						Serpina12
						Krt87
						Ap1s3
						Cyp2c65
						Rec8
						Micalcl
						Notum
						Ect2
						Sema4g
						Rnf222
						Kif22
						Kdm2b
						Tjp3
						Cyp2a5
						Armcx6
						Krt31
						Fermt1
						Dynlt1f
						Tmem238
						Syt8
						Tgfa
						Arhgef26
						Phldb3
						Lama3
						Pbk
						Rnf223
						Dctd
						Cyp3a13
						Hoxc13
						Dact2
						Slc5a9
						Krt81
						Pglyrp3
						Pnpla1
						Cep55
						Rnf43
						Slc6a4
						C330027C09Rik
						Aurkb
						Fam221a
						Tbx2
						Etnk2
						Nipal1
						Rasal1
						Marveld2
						D730001G18Rik
						Hmgb2
						Cryba2
						Krtap3-2
						Klk5
						Abcc3
						Tex40
						Mir5134
						Ovol2
						Ccnf
						Fam110c
						Gm11992
						Ccnb1
						S100g
						AA467197
						Klk1b11
						Mbnl3
						Melk
						Acox2
						Ivl
						Slc35f2
						Duoxa2
						Pappa
						Duox2
						Ocln
						Cd164l2
						Slc15a1
						Pglyrp4
						Dlx5
						4933439K11Rik
						Slitrk6
						Mir412
						Fam64a
						Cxcl5
						Zfp296
						Stmn1
						Gzmn
						Map3k9
						Robo1
						Tdh
						Tmem102
						Fut1
						Ceacam19
						Nuf2
						Cldn23
						Ush1g
						Lipk
						Dlx4os
						2210409D07Rik
						Shcbp1
						BC100530
						9330162012Rik
						Kif2c
						Nxph3
						Rad51
						Dyrk3
						Slc26a9
						Sh3gl2
						Ces1g
						Pou2f3
						Nek2
						Casp14
						Fgf10
						Hmmr
						Gm11562
						Lhx8
						Vwa2
						Tbx3os2
						Serpinb3d
						Uhrf1
						Clec2g
						Cyp7b1
						Adora2b
						Hs3st3b1
						Plcxd1
						BC016579
						Il1f10
						Dlgap5
						Fam171a2
						Lmntd2
						Ccdc129
						S100a3
						Cemip
						Frmd7
						Krt75
						Scnn1b
						Tfap2e
						Cdca5
						Lpar3
						Celf4
						Ttpa
						Rundc3a
						4930427A07Rik
						Qprt
						Nfe2l3
						1810041L15Rik
						Kif4
						Akr1c18
						9130227L01Rik
						Mxd3
						Dio3os
						Cenpe
						Kctd4
						Ltb4r2
						Dnajc6
						Bean1
						Hs3st6
						Tmem95
						Rhbdl2
						Fam187b
						Tlx1
						Krtap2-4
						Serpinb13
						Gal3st1
						Gpr35
						Ccdc113
						Traip
						Srms
						Lrrc55
						Kif15
						E130114P18Rik
						Ascl2
						Neil3
						Ncapg
						Upk3bl
						Gm15772
						Mir5121
						Dsc1
						Fam63a
						Esrp1
						Egfbp2
						Klk1b26
						Atp1b4
						Gm20219
						Gpr87
						Tuft1
						Il18
						Gss
						Plpp2
						Eps8l1
						Vsig10l
						Atg9b
						Tmem265
						Tfap2a
						Krt85
						Gyltl1b
						Mycl
						Plch2
						Tmigd1
						Fxyd4
						Eppk1
						Ces2f
						Gm5424
						Dynlt1c
						Chaf1a
						5730408K05Rik
						Muc15
						Prdm1
						Kcnh1
						Fam83b
						Vangl2
						Aldoc
						Cdc25c
						3300005D01Rik
						Rps6ka6
						Gnb2l1
						Ces1h
						Snord33
						Nras
						Epb4.1l4b
						Masp1
						Crlf1
						Duoxa1
						Pfas
						4930512H18Rik
						2310043M15Rik
						Dnaaf2
						Gm15832
						Lpcat4
						Ppap2c
						Rian
						5430421N21Rik
						Ephb3
						Mettl21d
						Def6
						Cdcp1
						Gm11974
						Atp13a4
						2310005G13Rik
						4631405K08Rik
						Pdlim2
						9930013L23Rik
						1810019J16Rik
						Rbbp8nl
						Clca5
						4933424L21Rik
						Jakmip2
						Ctnnd2
						Trip13
						Ncaph
						1600016N20Rik
						Robo2
						Mroh3
						Pif1
						Sprr2h
						Il1a
