# Supplementary material for: Transcriptional profiling reveals extraordinary diversity among skeletal muscle tissues
Source: eLife journal article supplement (doi:10.7554/elife.34613), 2018-05-29
Supplement: supp [file elife-34613-supp-v1.zip › elife_poa_e34613_Supplementary_file_6.xlsx]

## Sheet: Sheet1
Tissue	Gene	UCSC Transcript ID	Specificity Index	Notes
Diaphragm	Upk1b	uc007zfm	0.954392
Diaphragm	Upk3b	uc008zzq	0.950647
EDL	Dkk3	uc009jgk	0.433923
Extraocular Eye	Bpifa6	uc008nir	0.995879	Other uncharacterized transcripts have modestly higher specificity indexes
FDB	Bbox1	uc008lmu	0.913872
Gastrocnemius	Hoxd8	uc008keb	0.47424
Gastrocnemius	Hoxd9	uc008kdz	0.467389
Masseter	Smr3a	uc012dxy	0.999077
Plantaris	Odf3l2	uc007fze	0.459157
Quadriceps	Smarca1	uc009tbn	0.311809	Other uncharacterized transcripts have modestly higher specificity indexes
Soleus	Myl3	uc009rur	0.801052
Soleus	Myh7	uc007txv	0.648037	Confirmed by literature (Burkholder et al. (1994))
Tongue	Etv2	uc009gfm	1	Several dozen other transcripts show similarly high specificity indexes
Tibialis Anterior	Lrtm2	uc009dmc	0.379283
