# Supplementary material for: Transcriptional profiling reveals extraordinary diversity among skeletal muscle tissues
Source: eLife journal article supplement (doi:10.7554/elife.34613), 2018-05-29
Supplement: supp [file elife-34613-supp-v1.zip › elife_poa_e34613_Supplementary_file_7.xlsx]

## Sheet: Sheet1
Coordinates(Chromosome:Start-Stop)	Tissues
chr10:100076906-100079973	GAS,MAS,PLA,QUAD
chr10:100080131-100080856	GAS,MAS,PLA,QUAD
chr10:100080941-100087346	MAS
chr10:100088221-100089195	GAS,PLA
chr10:100575887-100577160	GAS,MAS,PLA
chr10:100577359-100578314	GAS,MAS,QUAD
chr10:100578432-100583913	GAS,MAS,PLA,QUAD
chr10:10546452-10550678	MAS
chr10:105763462-105765219	MAS
chr10:105765292-105765963	MAS
chr10:105766039-105779587	GAS,PLA
chr10:105797320-105823159	GAS
chr10:105823311-105825997	QUAD
chr10:105845450-105847016	GAS,MAS,PLA,QUAD
chr10:106936233-106937143	GAS
chr10:106948779-106951973	MAS,QUAD
chr10:106963026-106966947	GAS
chr10:106967044-106988805	GAS
chr10:107049499-107053327	GAS
chr10:107493473-107493810	GAS,MAS,PLA,QUAD
chr10:107493902-107494185	GAS,MAS,PLA,QUAD
chr10:107582465-107584205	TON
chr10:107597432-107618348	MAS
chr10:107618541-107659301	DIA,EYE,MAS,TON
chr10:107650205-107651259	MAS
chr10:107657185-107659301	EYE,MAS
chr10:108214507-108230436	GAS,MAS,PLA,QUAD
chr10:108234144-108240104	GAS,MAS
chr10:108240180-108240778	GAS,MAS,QUAD
chr10:108240868-108241120	GAS,MAS
chr10:108243131-108249434	GAS
chr10:108249070-108249434	FDB,SOL,TON
chr10:108249651-108250913	GAS
chr10:108251009-108251839	GAS
chr10:108251945-108252756	GAS,MAS,QUAD
chr10:108259847-108260835	GAS,MAS
chr10:108261037-108261244	GAS,QUAD
chr10:108261417-108262309	GAS,MAS,PLA,QUAD
chr10:108262432-108264702	GAS,MAS,PLA
chr10:108264769-108267403	MAS,PLA
chr10:108267421-108268571	PLA
chr10:108269359-108271721	GAS,MAS,PLA,QUAD
chr10:108271770-108274137	GAS,MAS,PLA,QUAD
chr10:108274189-108277206	GAS,MAS,PLA,QUAD
chr10:108444590-108444698	AA,AOR,TA
chr10:110934694-110935147	AA,AOR,TA
chr10:110937867-110938636	GAS,PLA
chr10:110938731-110939210	GAS
chr10:110944532-110945468	GAS,MAS,PLA,QUAD
chr10:110945564-110946166	GAS,MAS,PLA,QUAD
chr10:110946325-110947298	GAS,MAS,PLA,QUAD
chr10:110947383-110948190	GAS,MAS,QUAD
chr10:110948285-110949620	GAS,MAS,PLA,QUAD
chr10:110949684-110950560	GAS,MAS,PLA,QUAD
chr10:110955167-110956285	GAS,MAS
chr10:110956429-110961011	GAS,MAS,PLA,QUAD
chr10:110961138-110967683	MAS
chr10:110967847-110968428	GAS,MAS,QUAD
chr10:110968494-110973747	GAS,MAS,PLA,QUAD
chr10:110973893-110974343	MAS,QUAD
chr10:110974422-110981995	GAS,MAS,PLA,QUAD
chr10:110982119-110985939	GAS,MAS,PLA,QUAD
chr10:111276559-111277246	MAS
chr10:111277344-111280289	GAS
chr10:111280389-111282126	GAS,MAS,QUAD
chr10:111282225-111284329	GAS,MAS,QUAD
chr10:111284420-111286115	GAS,MAS,QUAD
chr10:111286253-111287826	GAS,MAS,PLA,QUAD
chr10:111288013-111288692	GAS,MAS,PLA,QUAD
chr10:111288781-111289788	MAS,QUAD
chr10:111289895-111291490	GAS,MAS,QUAD
chr10:111291594-111293091	GAS,MAS,QUAD
chr10:111494294-111494794	GAS,MAS,PLA,QUAD
chr10:111494825-111495324	GAS,MAS,PLA,QUAD
chr10:111495376-111496039	GAS,MAS,PLA,QUAD
chr10:111496106-111496753	MAS
chr10:11152269-11154658	MAS
chr10:11157239-11159517	MAS
chr10:11162228-11162808	GAS
chr10:11163063-11164344	GAS
chr10:11170143-11170246	GAS,MAS
chr10:11178823-11181511	GAS
chr10:11185463-11186380	GAS
chr10:11188166-11189630	GAS
chr10:11189775-11190985	GAS,QUAD
chr10:11191088-11192485	GAS,MAS
chr10:111975658-111976741	GAS,MAS,PLA
chr10:111976877-111977111	GAS,MAS,PLA,QUAD
chr10:111977238-111977314	GAS,MAS,PLA,QUAD
chr10:111979148-111979886	PLA
chr10:111980058-111982800	GAS,MAS,PLA,QUAD
chr10:111982879-111982963	GAS,MAS,PLA,QUAD
chr10:111983058-111984538	GAS,MAS,PLA,QUAD
chr10:111985683-111985777	MAS
chr10:111993681-111996857	MAS
chr10:11205274-11206268	MAS
chr10:11291573-11295216	GAS,PLA,QUAD
chr10:11390986-11448641	GAS,MAS,PLA,QUAD
chr10:11448884-11457139	GAS,MAS,PLA,QUAD
chr10:115199765-115202503	GAS,MAS,PLA,QUAD
chr10:115202591-115203117	MAS
chr10:115203235-115208896	GAS,MAS,QUAD
chr10:115208995-115209556	GAS,MAS,PLA,QUAD
chr10:115209657-115210195	GAS,MAS,PLA,QUAD
chr10:115212808-115217561	GAS,MAS,PLA,QUAD
chr10:115217657-115218550	GAS,MAS,PLA,QUAD
chr10:115218655-115219151	GAS,MAS,PLA,QUAD
chr10:115219281-115220210	GAS,MAS,PLA,QUAD
chr10:115220409-115220687	AOR,GAS,MAS,QUAD,TAN,TON
chr10:115221686-115229124	GAS,MAS,PLA,QUAD
chr10:115229336-115233119	GAS,MAS,PLA,QUAD
chr10:115233259-115239271	GAS,MAS,PLA,QUAD
chr10:115239347-115240848	GAS,MAS,PLA,QUAD
chr10:115290912-115294870	GAS,MAS,PLA,QUAD
chr10:115294960-115295428	GAS,MAS,PLA,QUAD
chr10:115295484-115298827	GAS,MAS,PLA,QUAD
chr10:115298892-115301522	GAS,MAS,PLA,QUAD
chr10:115301631-115302731	GAS,MAS,PLA,QUAD
chr10:115342670-115343697	PLA
chr10:115343908-115347031	PLA
chr10:115347287-115347645	GAS,MAS,PLA,QUAD
chr10:115347784-115359653	MAS
chr10:115359768-115361808	GAS,MAS,PLA,QUAD
chr10:115372947-115376351	GAS
chr10:115398070-115400714	GAS
chr10:115403321-115404199	MAS
chr10:115404298-115406352	MAS,PLA
chr10:115406563-115406733	MAS
chr10:115412263-115412356	GAS,PLA
chr10:115412467-115413961	GAS,MAS,QUAD
chr10:115414094-115414195	GAS,MAS,QUAD
chr10:115414318-115415238	GAS,QUAD
chr10:115415740-115416738	GAS,MAS,QUAD
chr10:115418829-115419771	GAS
chr10:115419961-115420641	QUAD
chr10:115420880-115423204	GAS,MAS,QUAD
chr10:115423311-115423383	GAS,MAS,PLA,QUAD
chr10:115424653-115427035	GAS,MAS,PLA
chr10:115427147-115427397	GAS,MAS,PLA,QUAD
chr10:115428962-115430652	GAS,PLA
chr10:115430755-115431402	GAS,QUAD
chr10:115431443-115431702	GAS,MAS,QUAD
chr10:115817387-115817492	GAS,MAS,PLA,QUAD
chr10:115817661-115827820	GAS,MAS,PLA,QUAD
chr10:115827884-115833184	GAS,MAS,PLA,QUAD
chr10:115833323-115835091	GAS,MAS,PLA,QUAD
chr10:115835167-115835275	GAS,MAS,PLA,QUAD
chr10:115835384-115839874	GAS,MAS,PLA,QUAD
chr10:115840001-115844051	GAS,MAS,PLA,QUAD
chr10:115844136-115849342	GAS,MAS,PLA,QUAD
chr10:116302382-116313813	QUAD
chr10:116314093-116315041	GAS,MAS
chr10:116317630-116319332	GAS,PLA
chr10:116322686-116327949	GAS,MAS,QUAD
chr10:116338880-116339417	GAS
chr10:116341155-116341379	MAS
chr10:116341650-116343792	GAS,MAS,PLA
chr10:116347063-116347926	GAS,MAS
chr10:116348209-116349965	GAS,MAS,QUAD
chr10:116354035-116357191	GAS,MAS,PLA,QUAD
chr10:116357299-116361207	GAS,MAS,PLA,QUAD
chr10:116361308-116362343	PLA
chr10:116362428-116362523	MAS,PLA
chr10:116362726-116363278	GAS,MAS,PLA,QUAD
chr10:116363370-116363974	GAS,MAS,PLA,QUAD
chr10:116364052-116367480	GAS,MAS,PLA,QUAD
chr10:116367616-116368692	MAS,PLA
chr10:116368816-116369295	GAS,MAS,PLA,QUAD
chr10:116380953-116383852	GAS,MAS,PLA,QUAD
chr10:116486287-116492291	GAS,MAS,PLA,QUAD
chr10:116492437-116493692	GAS,MAS,PLA,QUAD
chr10:116493794-116494822	GAS,MAS,PLA,QUAD
chr10:116494873-116494959	GAS,MAS,PLA,QUAD
chr10:116495022-116498085	GAS,MAS,PLA,QUAD
chr10:116498243-116498337	GAS,MAS,PLA,QUAD
chr10:116498459-116499341	GAS,MAS,PLA,QUAD
chr10:116499467-116501191	GAS,MAS,PLA,QUAD
chr10:116501318-116504034	GAS,MAS,PLA,QUAD
chr10:116504115-116506228	GAS,MAS,PLA,QUAD
chr10:116506412-116507040	MAS
chr10:116507189-116517316	GAS,MAS,PLA,QUAD
chr10:116517384-116527826	GAS,MAS,PLA,QUAD
chr10:116527950-116549032	MAS
chr10:116537279-116549032	QUAD
chr10:116746931-116749923	AOR
chr10:116907119-116910124	GAS,MAS,PLA,QUAD
chr10:116910382-116914096	MAS
chr10:116914210-116915843	GAS,PLA,QUAD
chr10:116915973-116918761	MAS
chr10:116918966-116919573	GAS,MAS
chr10:116919652-116928188	GAS,MAS,PLA,QUAD
chr10:116928285-116937396	GAS,PLA,QUAD
chr10:116937656-116939200	GAS,MAS,PLA,QUAD
chr10:116986813-116988614	GAS,MAS,PLA
chr10:116988783-116992507	MAS,QUAD
chr10:116992603-116993063	QUAD
chr10:117002675-117003884	GAS,MAS,PLA,QUAD
chr10:117003963-117004380	MAS
chr10:117004534-117007587	MAS,PLA,QUAD
chr10:117007669-117008889	GAS,MAS,PLA,QUAD
chr10:117051277-117053015	GAS,MAS,PLA,QUAD
chr10:117053158-117054039	GAS,MAS,PLA,QUAD
chr10:117054140-117054876	GAS,MAS,PLA,QUAD
chr10:117054981-117055106	GAS,MAS,PLA,QUAD
chr10:117055236-117056039	GAS,MAS,PLA,QUAD
chr10:117056160-117057173	GAS,MAS,PLA
chr10:117057278-117057790	GAS,MAS,PLA,QUAD
chr10:117057919-117058097	GAS,MAS,PLA,QUAD
chr10:117058199-117060647	GAS,MAS,PLA,QUAD
chr10:117060851-117061297	GAS,MAS,PLA,QUAD
chr10:117061411-117061504	GAS,MAS,PLA,QUAD
chr10:117061582-117062024	GAS,MAS,PLA,QUAD
chr10:117062137-117062816	GAS,MAS,PLA,QUAD
chr10:117062883-117062975	GAS,MAS,PLA,QUAD
chr10:117063051-117063705	MAS,PLA
chr10:117077671-117078759	GAS,MAS,QUAD
chr10:117078947-117081021	GAS
chr10:117215837-117217211	GAS,MAS,PLA,QUAD
chr10:117217300-117217428	GAS,MAS,PLA,QUAD
chr10:117217522-117220332	GAS,MAS,PLA,QUAD
chr10:117220428-117220531	GAS,MAS,PLA,QUAD
chr10:117220599-117222173	GAS,MAS,PLA,QUAD
chr10:117278188-117278642	GAS,MAS,PLA,QUAD
chr10:117278722-117280640	GAS,MAS,PLA,QUAD
chr10:117280806-117282106	GAS,MAS,PLA,QUAD
chr10:117288650-117289118	GAS,MAS
chr10:117349468-117355934	MAS
chr10:117356125-117358992	GAS,MAS,PLA,QUAD
chr10:117356128-117358992	MAS
chr10:117359147-117360439	GAS,MAS,PLA,QUAD
chr10:117360556-117360855	GAS,MAS,PLA
chr10:117361361-117362013	MAS
chr10:117362188-117362974	GAS,MAS,PLA,QUAD
chr10:117363121-117366080	GAS,MAS,PLA,QUAD
chr10:117366185-117367778	GAS,MAS,PLA,QUAD
chr10:117690786-117691144	GAS,MAS,PLA,QUAD
chr10:117691223-117692581	GAS,MAS,PLA,QUAD
chr10:117695069-117695952	GAS,MAS,PLA,QUAD
chr10:117696050-117696380	GAS,MAS,PLA,QUAD
chr10:117696440-117701564	GAS,MAS,PLA,QUAD
chr10:117701615-117702201	GAS,MAS,PLA,QUAD
chr10:117702336-117705154	GAS,MAS,PLA,QUAD
chr10:117757381-117757895	QUAD
chr10:117762136-117763730	MAS
chr10:117766030-117766333	MAS
chr10:117766404-117770187	GAS,MAS
chr10:117776290-117777128	GAS
chr10:117781449-117781956	MAS,QUAD
chr10:117787912-117789973	MAS
chr10:117815781-117817343	GAS,MAS,PLA,QUAD
chr10:117817461-117818465	GAS,MAS,PLA,QUAD
chr10:117818610-117820461	GAS,MAS,PLA,QUAD
chr10:117820603-117821589	GAS,MAS,PLA,QUAD
chr10:117821647-117822800	GAS,MAS,PLA,QUAD
chr10:117822870-117824593	MAS
chr10:119203206-119206715	GAS
chr10:119206824-119208026	MAS,QUAD
chr10:119208192-119208272	GAS,MAS,PLA,QUAD
chr10:119208443-119209973	GAS,MAS,PLA
chr10:119210070-119210654	GAS
chr10:119212149-119212439	MAS
chr10:119215348-119216142	GAS
chr10:119216249-119216450	GAS,MAS,PLA
chr10:119216708-119217940	MAS
chr10:120095192-120098181	GAS,PLA,QUAD
chr10:120098337-120101397	GAS,QUAD
chr10:120215650-120217503	GAS,MAS,PLA,QUAD
chr10:120217610-120220750	GAS,MAS,PLA,QUAD
chr10:120220785-120222005	GAS,MAS,PLA,QUAD
chr10:120222124-120223836	GAS,MAS,PLA,QUAD
chr10:120223883-120224619	GAS,MAS,PLA,QUAD
chr10:12058671-12061517	DIA
chr10:120784239-120791401	GAS,MAS,PLA,QUAD
chr10:120791500-120825107	GAS,MAS,PLA,QUAD
chr10:120825137-120849975	GAS,MAS,PLA,QUAD
chr10:120850054-120851983	GAS,MAS,PLA,QUAD
chr10:120852093-120871034	PLA
chr10:120925557-120925766	GAS,QUAD
chr10:120925846-120925934	MAS,PLA,QUAD
chr10:120926041-120927945	GAS,MAS,PLA,QUAD
chr10:120928028-120931041	MAS,PLA,QUAD
chr10:120931221-120931720	GAS,MAS,PLA,QUAD
chr10:120931824-120931927	GAS,PLA
chr10:120933541-120933629	GAS,MAS,PLA,QUAD
chr10:120933710-120947203	GAS,QUAD
chr10:120947272-120949296	GAS,QUAD
chr10:120949364-120952217	MAS
chr10:120952256-120977783	PLA
chr10:121374565-121376207	GAS,MAS,PLA
chr10:121376274-121376635	MAS
chr10:121378190-121380117	GAS,MAS,PLA,QUAD
chr10:121380201-121381172	GAS,MAS,PLA
chr10:121381292-121383339	GAS,MAS,PLA,QUAD
chr10:121383444-121388100	GAS,MAS,PLA,QUAD
chr10:121388203-121390623	GAS,MAS,PLA,QUAD
chr10:121390732-121391370	GAS,MAS,PLA,QUAD
chr10:121391482-121392680	GAS,MAS,PLA,QUAD
chr10:121392842-121395047	MAS,PLA
chr10:121413086-121414357	GAS,MAS,PLA
chr10:121414468-121416065	GAS,MAS,PLA,QUAD
chr10:121416289-121417084	GAS,MAS,PLA,QUAD
chr10:121547189-121551250	GAS,PLA
chr10:121551594-121552199	GAS,MAS,PLA,QUAD
chr10:121552510-121553028	GAS,MAS,PLA,QUAD
chr10:121553069-121553744	MAS,PLA,QUAD
chr10:121553822-121553902	PLA
chr10:121554025-121555986	GAS,MAS,PLA,QUAD
chr10:121557304-121559846	PLA
chr10:121560300-121561576	GAS,MAS,PLA
chr10:121561774-121563925	GAS,MAS,PLA
chr10:121568140-121570630	GAS
chr10:121570792-121571842	MAS
chr10:121572025-121576273	MAS
chr10:121576404-121578579	PLA,QUAD
chr10:121609187-121609696	GAS,MAS,PLA,QUAD
chr10:121615224-121616614	GAS,MAS,PLA
chr10:122081690-122088878	GAS,MAS,PLA,QUAD
chr10:122089050-122090459	GAS,MAS,PLA,QUAD
chr10:122090775-122094589	GAS,MAS,PLA,QUAD
chr10:122094693-122095938	GAS,MAS,PLA,QUAD
chr10:122995834-122999658	GAS,MAS,PLA,QUAD
chr10:122999742-123002695	GAS,MAS,PLA,QUAD
chr10:123002904-123006011	GAS,PLA,QUAD
chr10:123006136-123006971	GAS,MAS,PLA,QUAD
chr10:123007033-123008135	GAS,MAS,PLA,QUAD
chr10:123008327-123009502	GAS,MAS,PLA,QUAD
chr10:123009632-123009912	GAS,MAS,PLA,QUAD
chr10:123009931-123010493	GAS,MAS,PLA,QUAD
chr10:123010638-123013367	GAS,MAS,PLA,QUAD
chr10:123013991-123014940	GAS
chr10:123016557-123018074	GAS,MAS,PLA,QUAD
chr10:123018238-123020303	GAS,MAS,QUAD
chr10:123020480-123022833	GAS,MAS,PLA,QUAD
chr10:123022945-123023909	GAS,MAS,QUAD
chr10:123024012-123026079	GAS,MAS,PLA,QUAD
chr10:123026171-123026253	GAS,MAS,PLA,QUAD
chr10:123026328-123026406	MAS,PLA
chr10:123029246-123030109	GAS,PLA
chr10:123032750-123034304	MAS
chr10:123035605-123036011	GAS,MAS,PLA,QUAD
chr10:123036137-123038460	GAS,MAS,PLA,QUAD
chr10:123038656-123042230	GAS
chr10:123043070-123046297	GAS,MAS,PLA,QUAD
chr10:123046428-123051636	GAS,MAS,PLA,QUAD
chr10:123051769-123052184	MAS
chr10:123052313-123059187	GAS,PLA
chr10:123113688-123119108	GAS,MAS,PLA,QUAD
chr10:123119198-123121571	GAS,MAS,PLA,QUAD
chr10:123121676-123123935	GAS,MAS,PLA,QUAD
chr10:123124086-123124513	GAS,MAS,PLA,QUAD
chr10:123124630-123124963	GAS,MAS,PLA,QUAD
chr10:123125035-123125412	GAS,MAS,PLA,QUAD
chr10:123125686-123125811	GAS,MAS,PLA,QUAD
chr10:123125928-123127677	GAS,MAS,PLA,QUAD
chr10:123127870-123127963	GAS,MAS,PLA,QUAD
chr10:123128059-123128148	GAS,MAS,PLA,QUAD
chr10:123128233-123130940	GAS,MAS,PLA,QUAD
chr10:123131166-123131251	GAS,MAS,PLA,QUAD
chr10:123131411-123132955	GAS,MAS,PLA,QUAD
chr10:123133130-123146793	GAS,MAS,PLA,QUAD
chr10:123146939-123153040	GAS,MAS,PLA,QUAD
chr10:123146939-123163592	GAS,MAS,PLA,QUAD
chr10:123153128-123163592	GAS,MAS,PLA,QUAD
chr10:123163655-123168226	GAS,MAS,PLA,QUAD
chr10:123168373-123171099	GAS,MAS,PLA,QUAD
chr10:123171227-123175842	GAS,MAS,PLA,QUAD
chr10:123175974-123181672	GAS,MAS,PLA,QUAD
chr10:12384197-12385517	MAS
chr10:12406595-12413935	MAS
chr10:12415247-12415450	GAS,MAS
chr10:12415490-12421596	GAS
chr10:12421734-12436280	GAS,MAS,PLA,QUAD
chr10:12439794-12441935	MAS,PLA
chr10:12442094-12448006	MAS,PLA
chr10:12448093-12455362	PLA
chr10:12455565-12463285	GAS,MAS,PLA,QUAD
chr10:12463361-12465180	GAS,MAS,PLA,QUAD
chr10:12465243-12475270	MAS
chr10:12478492-12481223	QUAD
chr10:12481371-12486385	MAS
chr10:12486655-12501377	GAS,MAS
chr10:12636802-12640926	GAS,MAS,QUAD
chr10:12641045-12643402	GAS,MAS,PLA
chr10:12649219-12652710	GAS,MAS,PLA
chr10:12652861-12654698	MAS
chr10:12665139-12666698	MAS,QUAD
chr10:12671931-12678579	GAS,MAS
chr10:126993909-126995854	MAS,PLA
chr10:127022927-127024935	GAS,PLA
chr10:127025024-127028364	GAS,MAS,PLA,QUAD
chr10:127029683-127030462	MAS
chr10:127043224-127044466	GAS
chr10:127044652-127044755	MAS,PLA
chr10:127044870-127045025	PLA
chr10:127045128-127045278	MAS,PLA
chr10:127064721-127064834	GAS,MAS,PLA,QUAD
chr10:127065003-127065154	GAS,MAS,PLA,QUAD
chr10:127065265-127065952	GAS,MAS,PLA,QUAD
chr10:127066004-127066100	GAS,MAS,PLA,QUAD
chr10:127066237-127066928	GAS,MAS,PLA
chr10:127068191-127068268	GAS,MAS,PLA,QUAD
chr10:127068383-127068479	GAS,MAS,PLA,QUAD
chr10:127068612-127068907	GAS,MAS,PLA,QUAD
chr10:127068989-127069345	PLA
chr10:127069514-127070114	GAS,MAS,PLA
chr10:127070625-127070916	GAS
chr10:127085661-127086926	MAS
chr10:127096373-127096629	GAS,MAS
chr10:127096743-127097931	GAS,MAS,PLA
chr10:127098638-127098830	MAS
chr10:127099708-127099889	MAS
chr10:127099992-127100084	MAS
chr10:127100296-127119098	MAS
chr10:127119198-127119402	MAS
chr10:127119480-127119603	GAS,MAS
chr10:127119668-127120368	MAS,PLA
chr10:127169843-127169977	MAS
chr10:127170169-127170590	MAS
chr10:127172577-127173274	MAS
chr10:127176686-127176806	MAS
chr10:127182944-127183197	MAS
chr10:127183410-127183648	GAS,MAS
chr10:127184213-127184391	GAS,PLA,QUAD
chr10:127184470-127184662	GAS,MAS,QUAD
chr10:127184714-127184886	GAS
chr10:127184980-127185082	MAS
chr10:127185173-127185286	PLA
chr10:127185357-127185574	GAS,MAS,PLA
chr10:127185679-127185859	GAS,PLA
chr10:127185927-127186082	PLA
chr10:127186160-127186878	GAS,MAS,PLA
chr10:127186975-127187107	GAS
chr10:127193358-127193729	GAS,MAS,PLA,QUAD
chr10:127193804-127194409	GAS,MAS,PLA,QUAD
chr10:127195758-127196324	AA
chr10:127199857-127200183	GAS,MAS,PLA,QUAD
chr10:127200298-127200839	GAS,MAS,PLA,QUAD
chr10:127200879-127201038	GAS,MAS,PLA
chr10:127201186-127205674	GAS,MAS,PLA,QUAD
chr10:127205819-127206613	GAS,MAS,PLA,QUAD
chr10:127206711-127208869	MAS,PLA
chr10:12726381-12727732	GAS
chr10:127267646-127274713	GAS,MAS,PLA,QUAD
chr10:127274811-127274993	GAS,MAS,PLA,QUAD
chr10:127275056-127275823	GAS,MAS,PLA,QUAD
chr10:127275923-127276383	GAS,MAS,PLA,QUAD
chr10:127276545-127276701	MAS,PLA
chr10:127276850-127277254	GAS,MAS,PLA
chr10:127277321-127277486	GAS,MAS,PLA,QUAD
chr10:127277526-127277694	GAS,MAS,PLA,QUAD
chr10:127277773-127277866	GAS,MAS,PLA,QUAD
chr10:127277939-127278119	GAS,MAS,PLA,QUAD
chr10:127278223-127278316	GAS,MAS,PLA,QUAD
chr10:127278409-127281400	GAS,MAS,PLA,QUAD
chr10:12727913-12728710	GAS
chr10:127282310-127282414	AOR,TA
chr10:127290892-127293711	MAS,PLA
chr10:127293760-127295320	GAS,MAS,PLA,QUAD
chr10:127295479-127295722	MAS,PLA
chr10:127296441-127296540	MAS,PLA
chr10:127296634-127296716	GAS,PLA,QUAD
chr10:127296741-127296872	GAS,PLA,QUAD
chr10:127297653-127297734	GAS,MAS,PLA,QUAD
chr10:127297840-127297921	GAS,MAS,PLA,QUAD
chr10:127298054-127299247	GAS,MAS,PLA,QUAD
chr10:127299462-127299948	GAS,MAS,PLA,QUAD
chr10:127300067-127300177	GAS,MAS,PLA,QUAD
chr10:127300274-127300409	GAS,PLA
chr10:127300581-127302811	MAS,PLA,QUAD
chr10:127302887-127304184	MAS,PLA
chr10:127304387-127305421	GAS,MAS,PLA,QUAD
chr10:127305626-127305740	GAS,MAS,PLA,QUAD
chr10:127305858-127308257	PLA
chr10:127308365-127308500	MAS,PLA
chr10:127308680-127308907	GAS,MAS,PLA,QUAD
chr10:127308984-127310003	GAS,MAS,PLA,QUAD
chr10:127310299-127310443	GAS,MAS,PLA,QUAD
chr10:127325631-127325843	MAS
chr10:127327737-127327898	MAS
chr10:127327977-127328093	MAS
chr10:127328148-127328389	MAS
chr10:127328525-127328877	MAS
chr10:127328984-127329498	MAS
chr10:127390428-127400125	GAS,MAS,PLA,QUAD
chr10:127400194-127444275	GAS,MAS,PLA,QUAD
chr10:127452034-127452691	GAS,MAS,PLA,QUAD
chr10:127452779-127454629	GAS,MAS,PLA,QUAD
chr10:127454757-127457649	GAS,MAS,PLA,QUAD
chr10:127458199-127458809	GAS,MAS,PLA,QUAD
chr10:127458951-127459466	GAS,MAS,PLA,QUAD
chr10:127459576-127462187	GAS,MAS,PLA,QUAD
chr10:127462284-127464981	GAS,MAS,PLA,QUAD
chr10:127465014-127465130	GAS,MAS,PLA,QUAD
chr10:127465014-127471767	GAS,PLA,QUAD
chr10:127465185-127471767	GAS,MAS,PLA,QUAD
chr10:127476699-127481692	GAS,MAS,PLA
chr10:127481795-127483975	MAS,PLA,QUAD
chr10:127484219-127484505	GAS,MAS,PLA,QUAD
chr10:127484633-127484861	MAS,PLA
chr10:127487876-127492568	GAS,MAS,PLA
chr10:127492739-127495020	MAS,PLA
chr10:127495169-127497161	PLA
chr10:127497260-127497540	GAS,MAS,PLA,QUAD
chr10:127497626-127498368	GAS,MAS,PLA,QUAD
chr10:127501910-127502681	DIA,EDL,EYE,FDB,GAS,MAS,PLA,QUAD,SOL,TAN,TON
chr10:127501985-127502681	GAS,MAS,PLA,QUAD
chr10:127502850-127503089	GAS,MAS,PLA,QUAD
chr10:127503355-127503567	GAS,MAS,PLA,QUAD
chr10:127503666-127503855	GAS,MAS,PLA,QUAD
chr10:127503917-127504857	GAS,MAS,PLA,QUAD
chr10:127504956-127507225	GAS,MAS,PLA,QUAD
chr10:127507293-127507460	GAS,MAS,PLA,QUAD
chr10:127507514-127507698	GAS,MAS,PLA,QUAD
chr10:127507785-127507945	GAS,MAS,PLA,QUAD
chr10:127507998-127508080	GAS,MAS,PLA,QUAD
chr10:127508219-127508379	GAS,MAS,PLA,QUAD
chr10:127515488-127516264	MAS
chr10:127516326-127516442	MAS,PLA
chr10:127517917-127518024	MAS,PLA
chr10:127519512-127519629	GAS,MAS,PLA,QUAD
chr10:127520172-127520337	MAS,PLA
chr10:127539091-127539232	GAS,MAS,PLA,QUAD
chr10:127539563-127539666	MAS,PLA
chr10:127539732-127539857	GAS,MAS,PLA
chr10:127539960-127540152	MAS,PLA
chr10:127541124-127541233	PLA
chr10:127541375-127541638	GAS,MAS,PLA,QUAD
chr10:127541816-127542184	MAS,PLA
chr10:127542302-127542566	MAS,PLA
chr10:127549434-127549907	MAS
chr10:127550727-127550944	MAS
chr10:127552310-127552710	MAS
chr10:127556132-127556209	MAS,PLA
chr10:127556737-127556883	MAS
chr10:127569034-127569283	GAS
chr10:127643250-127646890	MAS
chr10:127647824-127648105	MAS,PLA
chr10:127648190-127650695	MAS
chr10:127650835-127650952	GAS,MAS,PLA,QUAD
chr10:127652082-127652190	MAS,PLA
chr10:127652380-127652984	MAS,PLA
chr10:127653073-127653206	PLA
chr10:127653330-127654925	MAS
chr10:127655019-127655296	MAS
chr10:127655504-127656923	MAS
chr10:127657245-127657555	MAS,PLA
chr10:127657703-127658196	GAS,MAS,PLA,QUAD
chr10:127658261-127658356	MAS,PLA
chr10:127658462-127658628	GAS,MAS,PLA,QUAD
chr10:127658701-127659432	GAS,MAS,PLA,QUAD
chr10:127659499-127659588	MAS
chr10:127659718-127659794	MAS
chr10:127663265-127663349	GAS,QUAD
chr10:128026588-128027052	MAS
chr10:128036561-128039170	PLA
chr10:128045087-128046167	MAS,PLA,QUAD
chr10:128084075-128084296	GAS,MAS,PLA,QUAD
chr10:128084472-128085090	GAS,PLA,QUAD
chr10:128085213-128085441	GAS,MAS,PLA,QUAD
chr10:128085627-128086037	GAS,MAS,PLA,QUAD
chr10:128086197-128086297	GAS,MAS,PLA,QUAD
chr10:128086421-128088320	GAS,MAS,PLA,QUAD
chr10:128088534-128088956	GAS,MAS,PLA,QUAD
chr10:128089159-128090018	GAS,MAS,PLA,QUAD
chr10:128111349-128112581	MAS
chr10:128112768-128113462	GAS
chr10:128116758-128118554	GAS,MAS,PLA,QUAD
chr10:128118656-128118954	GAS,MAS
chr10:128119021-128119269	GAS,PLA
chr10:128119501-128119623	MAS
chr10:128121666-128121799	GAS,MAS
chr10:128122451-128123023	GAS,MAS,QUAD
chr10:128123656-128123765	MAS
chr10:128125183-128125268	MAS
chr10:128125646-128126017	GAS,PLA
chr10:128126242-128126325	MAS
chr10:128126470-128126587	QUAD
chr10:128133368-128133640	GAS,MAS,PLA
chr10:128134209-128134996	MAS,PLA
chr10:128135108-128137473	GAS,MAS,PLA
chr10:128137568-128137660	MAS,PLA
chr10:128137708-128137919	MAS,PLA
chr10:128146661-128151182	MAS,PLA
chr10:128276624-128276747	MAS
chr10:128282120-128282711	MAS
chr10:128283583-128283683	MAS
chr10:128283980-128284097	MAS
chr10:128309305-128310170	MAS
chr10:128314555-128314725	GAS,MAS
chr10:128314559-128314725	TON
chr10:128314825-128314922	GAS,MAS,PLA
chr10:128314994-128315097	GAS,MAS,QUAD
chr10:128316522-128317633	MAS
chr10:128319039-128320247	MAS
chr10:128323443-128323583	GAS,MAS,PLA
chr10:128323700-128326063	GAS,MAS,PLA,QUAD
chr10:128326268-128326576	GAS,MAS,PLA,QUAD
chr10:128326674-128327017	GAS,MAS,PLA,QUAD
chr10:128337960-128349752	GAS,MAS,PLA
chr10:128349804-128350432	GAS,MAS,PLA,QUAD
chr10:128350541-128351198	PLA
chr10:128352806-128353022	GAS,MAS,PLA,QUAD
chr10:128353212-128358333	GAS,MAS,PLA,QUAD
chr10:128359536-128359943	GAS,MAS,PLA,QUAD
chr10:128360154-128360967	GAS,MAS,PLA,QUAD
chr10:128363792-128364404	GAS,MAS,PLA,QUAD
chr10:128364507-128365022	GAS,MAS,PLA,QUAD
chr10:128365216-128368006	AOR,ATR,DIA,EDL,EYE,FDB,GAS,LV,MAS,PLA,QUAD,RV,SOL,TAN,TON
chr10:128378167-128378352	MAS
chr10:128378424-128379380	MAS
chr10:128381071-128381845	PLA
chr10:128382059-128382334	GAS,MAS,PLA
chr10:128382414-128382631	GAS,MAS,PLA,QUAD
chr10:128382747-128382900	MAS,PLA
chr10:128382984-128383059	GAS,MAS,PLA
chr10:128383178-128383354	GAS,MAS,PLA
chr10:128383424-128383568	MAS,QUAD
chr10:128383710-128383791	MAS,PLA
chr10:128383873-128386100	GAS,MAS,PLA,QUAD
chr10:128386481-128386958	GAS,MAS,PLA,QUAD
chr10:128387161-128387369	MAS
chr10:128387458-128387586	MAS
chr10:128388759-128388900	MAS
chr10:128388989-128389086	GAS,MAS,PLA,QUAD
chr10:128389171-128389247	MAS,PLA
chr10:128389394-128389480	MAS
chr10:128389564-128389769	MAS
chr10:128389853-128390032	GAS,MAS,PLA,QUAD
chr10:128401924-128408153	MAS,PLA
chr10:128408221-128408315	GAS,MAS,PLA,QUAD
chr10:128408398-128408534	GAS,MAS,PLA,QUAD
chr10:128408607-128408697	GAS,MAS,PLA,QUAD
chr10:128408837-128409246	GAS,MAS,PLA,QUAD
chr10:128461472-128462980	GAS,MAS,PLA
chr10:128463067-128463691	GAS,MAS,PLA,QUAD
chr10:128463774-128463866	GAS,MAS,PLA,QUAD
chr10:128463960-128465156	GAS,MAS,PLA,QUAD
chr10:128465227-128465436	GAS,MAS,PLA,QUAD
chr10:128465507-128468794	GAS,MAS,PLA,QUAD
chr10:128468871-128469005	GAS,MAS,PLA
chr10:128469138-128469241	GAS,MAS,PLA,QUAD
chr10:128469358-128469664	GAS,MAS,PLA,QUAD
chr10:128469790-128474200	GAS,MAS,PLA,QUAD
chr10:128474261-128474371	MAS,PLA
chr10:128474410-128474682	MAS,PLA
chr10:128475065-128480349	MAS,PLA,QUAD
chr10:128480464-128480850	GAS,MAS,PLA,QUAD
chr10:128482203-128482290	MAS,PLA
chr10:128482354-128482683	GAS,MAS,PLA,QUAD
chr10:128482943-128483174	MAS
chr10:128484215-128484296	GAS,MAS,PLA,QUAD
chr10:128491034-128491289	AA,AOR,TA,TON
chr10:128491034-128491719	GAS,MAS,PLA,QUAD
chr10:128491348-128492058	AA,AOR,TA
chr10:128491765-128492058	GAS,MAS,PLA,QUAD
chr10:128492503-128492601	AA,AOR,TA
chr10:128492746-128492938	AA,AOR,TA
chr10:128492746-128493333	ATR,EDL,FDB,LV,SOL
chr10:128493354-128493538	ATR,EDL,FDB
chr10:128493567-128493999	AA,AOR,ATR,FDB,LV,TA,TAN
chr10:128499527-128501634	GAS,MAS,PLA,QUAD
chr10:128501690-128502408	GAS,MAS,PLA,QUAD
chr10:128502942-128508736	SOL,TAN
chr10:128508869-128513103	TAN
chr10:128510660-128510979	GAS,MAS,PLA,QUAD
chr10:128511030-128511465	GAS,MAS,PLA,QUAD
chr10:128511572-128511654	GAS,MAS,PLA,QUAD
chr10:128511787-128511868	MAS
chr10:128512219-128512326	MAS
chr10:128512465-128515685	MAS,PLA
chr10:128513440-128513533	AOR,DIA,FDB,PLA,SOL,TAN,TON
chr10:128515773-128515864	MAS,PLA
chr10:128515937-128516144	MAS
chr10:128516449-128516532	GAS,MAS,PLA
chr10:128516582-128516675	GAS,MAS,PLA,QUAD
chr10:128516759-128516953	PLA,QUAD
chr10:128517131-128517248	MAS
chr10:128517765-128518927	MAS,PLA
chr10:128519015-128519141	MAS
chr10:128519214-128519427	MAS,PLA
chr10:128519521-128519598	GAS,MAS,PLA
chr10:128519686-128519788	GAS,MAS,PLA,QUAD
chr10:128519838-128520272	GAS,MAS,PLA,QUAD
chr10:128520356-128520643	PLA
chr10:128521031-128521613	GAS,MAS,PLA
chr10:128521670-128521826	MAS,PLA
chr10:128521917-128522054	GAS
chr10:128522128-128522248	GAS,MAS,PLA,QUAD
chr10:128522323-128522420	PLA
chr10:128559358-128559437	GAS,MAS,PLA,QUAD
chr10:128560295-128560658	GAS,MAS,PLA,QUAD
chr10:128560738-128560918	GAS,MAS,PLA,QUAD
chr10:128563706-128565739	MAS
chr10:128626241-128626475	GAS,PLA
chr10:128671927-128672103	GAS,MAS,PLA,QUAD
chr10:128672282-128672538	MAS
chr10:128699211-128699471	MAS
chr10:128702584-128703706	MAS
chr10:128720507-128720716	GAS,MAS
chr10:128720778-128720951	MAS
chr10:128721073-128721177	MAS,PLA
chr10:128721377-128722453	GAS,MAS,PLA,QUAD
chr10:128722545-128723184	GAS,MAS,PLA,QUAD
chr10:128723250-128723518	GAS,MAS
chr10:128723680-128728067	MAS
chr10:128728158-128728255	MAS
chr10:128728342-128729598	MAS
chr10:128729671-128729874	MAS
chr10:128729949-128730190	MAS,PLA
chr10:128730260-128730604	MAS
chr10:128731188-128731323	MAS
chr10:128733098-128733264	MAS
chr10:128733385-128733564	GAS,MAS,QUAD
chr10:128733640-128734087	GAS,MAS,PLA
chr10:128734138-128735830	GAS,MAS,PLA
chr10:128735909-128736140	GAS,MAS,PLA,QUAD
chr10:128736277-128736644	MAS,PLA
chr10:128736719-128737008	MAS
chr10:128807621-128814037	GAS,PLA,QUAD
chr10:128814145-128814565	GAS,MAS,PLA,QUAD
chr10:128814686-128816711	GAS,MAS,PLA,QUAD
chr10:128817061-128817200	MAS
chr10:128833412-128838446	GAS,MAS,PLA,QUAD
chr10:128922727-128923374	GAS,MAS,PLA
chr10:128939168-128939267	GAS,PLA
chr10:128939348-128940681	GAS,PLA,QUAD
chr10:128940938-128941821	GAS
chr10:128941942-128942807	GAS,PLA,QUAD
chr10:128943016-128943117	PLA
chr10:128943642-128943750	GAS,MAS,PLA
chr10:128943879-128944004	PLA
chr10:128944101-128944240	GAS,PLA,QUAD
chr10:128944303-128944403	GAS,MAS,PLA,QUAD
chr10:128944574-128945404	GAS,MAS,PLA
chr10:128945555-128946286	PLA
chr10:128946403-128946798	GAS,PLA,QUAD
chr10:128946992-128948816	GAS,MAS,PLA
chr10:128948898-128948982	GAS,PLA
chr10:128949063-128949160	GAS,PLA,QUAD
chr10:128949236-128949373	GAS,MAS,PLA,QUAD
chr10:128949477-128949962	GAS,PLA
chr10:128950140-128950303	MAS,PLA
chr10:128953557-128953759	PLA
chr10:128953859-128953945	GAS,MAS,PLA,QUAD
chr10:128954072-128956610	PLA
chr10:128954072-128957620	PLA
chr10:130356355-130356803	MAS
chr10:13178997-13179122	GAS,MAS,PLA,QUAD
chr10:13179324-13179654	MAS,QUAD
chr10:13179708-13179994	GAS,MAS,PLA,QUAD
chr10:13180135-13180889	GAS,PLA,QUAD
chr10:13181018-13182278	GAS,MAS,PLA,QUAD
chr10:13182529-13182860	GAS,MAS,PLA,QUAD
chr10:13182997-13185423	GAS,MAS,PLA,QUAD
chr10:13185512-13190574	GAS,PLA
chr10:13190746-13192107	GAS,MAS,PLA,QUAD
chr10:13224861-13232538	GAS,PLA
chr10:13234212-13239909	GAS,MAS,PLA,QUAD
chr10:13239966-13245410	GAS,MAS,PLA,QUAD
chr10:13245568-13247001	GAS,MAS,PLA,QUAD
chr10:13247196-13253341	GAS,MAS,PLA,QUAD
chr10:13261925-13266972	GAS,MAS,PLA,QUAD
chr10:13267054-13291794	GAS,MAS,PLA,QUAD
chr10:13503259-13505738	GAS,MAS,PLA,QUAD
chr10:13506079-13506705	GAS,MAS,PLA,QUAD
chr10:13506917-13507234	GAS,MAS,PLA,QUAD
chr10:13507426-13512617	GAS,MAS,PLA,QUAD
chr10:13512727-13514706	GAS,PLA,QUAD
chr10:13514864-13515116	LV
chr10:13524969-13527740	GAS,PLA
chr10:13527838-13531257	GAS,MAS,PLA,QUAD
chr10:13531381-13532339	MAS,QUAD
chr10:13532411-13534671	GAS,MAS,PLA,QUAD
chr10:13535610-13535708	GAS,MAS,PLA,QUAD
chr10:13535776-13535942	GAS,MAS,PLA,QUAD
chr10:13537475-13542623	GAS,MAS,PLA,QUAD
chr10:13542706-13546349	GAS
chr10:13546482-13552825	GAS,MAS,PLA
chr10:13647707-13653585	GAS,MAS,PLA,QUAD
chr10:13653750-13690523	GAS,MAS
chr10:13690640-13801847	GAS,MAS
chr10:13801950-13829242	MAS
chr10:13829399-13868617	MAS
chr10:14004276-14066582	GAS
chr10:14066685-14126451	GAS,MAS,PLA,QUAD
chr10:14117601-14126451	MAS
chr10:14126497-14127292	GAS
chr10:14132799-14133739	MAS,QUAD
chr10:14133895-14139384	GAS,MAS,PLA,QUAD
chr10:14139561-14142240	GAS,MAS,PLA,QUAD
chr10:14142343-14143058	GAS,MAS,PLA,QUAD
chr10:14143955-14148911	GAS,PLA,QUAD
chr10:14655846-14661065	GAS,MAS,PLA
chr10:14661153-14667931	GAS,MAS,PLA,QUAD
chr10:14668109-14675933	GAS,MAS,PLA,QUAD
chr10:14676043-14684063	GAS,MAS,PLA,QUAD
chr10:14684140-14684880	GAS,MAS,PLA,QUAD
chr10:14685009-14687613	GAS,MAS,PLA,QUAD
chr10:17796422-17799087	GAS,MAS,PLA,QUAD
chr10:17799534-17806764	GAS,MAS,PLA,QUAD
chr10:17806857-17815228	GAS,MAS,PLA,QUAD
chr10:17815400-17827791	GAS,MAS,PLA,QUAD
chr10:17827987-17830235	GAS,MAS,PLA,QUAD
chr10:17830356-17833277	GAS,MAS,PLA,QUAD
chr10:17833353-17838907	GAS,MAS,PLA,QUAD
chr10:17839001-17841425	GAS,MAS,PLA,QUAD
chr10:17841522-17842697	GAS,MAS,PLA,QUAD
chr10:17902378-17908033	MAS
chr10:18089572-18092844	GAS,MAS,PLA,QUAD
chr10:18093904-18094409	QUAD
chr10:18094573-18094844	GAS,MAS,PLA,QUAD
chr10:18094909-18096181	GAS,MAS,PLA,QUAD
chr10:18096337-18104153	GAS,PLA,QUAD
chr10:18104276-18114398	MAS
chr10:18114487-18115715	GAS,MAS,PLA,QUAD
chr10:18115818-18117664	GAS,MAS,PLA,QUAD
chr10:18117735-18118926	GAS,QUAD
chr10:18119046-18120164	MAS,PLA,QUAD
chr10:18121219-18122434	GAS,MAS,PLA,QUAD
chr10:18122531-18123024	GAS,MAS,PLA,QUAD
chr10:18123174-18123598	GAS,MAS,PLA,QUAD
chr10:18123705-18124879	GAS,PLA,QUAD
chr10:18225061-18230418	GAS,MAS,PLA,QUAD
chr10:19005332-19005550	MAS
chr10:19007330-19008144	GAS,MAS
chr10:19592198-19597415	MAS
chr10:19597531-19601319	GAS,MAS,PLA,QUAD
chr10:19601484-19603753	GAS,MAS,PLA,QUAD
chr10:19603933-19606233	GAS,MAS,PLA,QUAD
chr10:19606421-19607256	GAS,MAS,PLA,QUAD
chr10:19607382-19609136	GAS,MAS,QUAD
chr10:19626808-19631613	MAS
chr10:19631784-19632768	MAS
chr10:19860995-19869293	GAS,MAS,PLA,QUAD
chr10:19869394-19884777	GAS,MAS,PLA,QUAD
chr10:19884834-19887059	GAS,MAS,PLA,QUAD
chr10:19887174-19888655	GAS,MAS,PLA,QUAD
chr10:19888763-19894249	GAS,MAS,PLA,QUAD
chr10:19894359-19894724	GAS,MAS,PLA,QUAD
chr10:19894803-19904562	GAS,MAS,PLA,QUAD
chr10:20029204-20046371	GAS,QUAD
chr10:20059091-20067828	MAS
chr10:20067937-20076481	GAS
chr10:20104266-20108148	MAS
chr10:20118323-20118414	GAS
chr10:20127758-20131964	PLA
chr10:20137007-20138262	MAS,QUAD
chr10:20138376-20140648	MAS
chr10:20140726-20141522	MAS
chr10:20276276-20278124	MAS
chr10:20278346-20279995	MAS,PLA
chr10:20318112-20322002	MAS
chr10:20322117-20322962	GAS,MAS,PLA
chr10:20323869-20325139	GAS,MAS,PLA,QUAD
chr10:20325806-20325929	GAS,MAS,PLA,QUAD
chr10:20326100-20327163	TA
chr10:20326100-20328101	GAS,MAS,PLA,QUAD
chr10:20328208-20329309	GAS,MAS,PLA,QUAD
chr10:20329395-20332085	GAS,MAS,PLA,QUAD
chr10:20332262-20332395	TON
chr10:20332262-20333391	GAS,MAS,PLA,QUAD
chr10:20333573-20334498	GAS,MAS,PLA,QUAD
chr10:20333573-20339708	GAS,MAS,PLA,QUAD
chr10:20334646-20339708	GAS,MAS,PLA,QUAD
chr10:20339922-20340051	GAS,MAS,PLA,QUAD
chr10:20400633-20407127	GAS,PLA,QUAD
chr10:20407209-20410342	GAS,MAS,PLA,QUAD
chr10:20410440-20412995	GAS,MAS,PLA,QUAD
chr10:20413141-20418731	GAS,MAS,PLA,QUAD
chr10:20418824-20434464	GAS,MAS,QUAD
chr10:20434597-20436195	GAS,MAS,PLA
chr10:20436297-20438724	GAS,MAS,PLA,QUAD
chr10:20438821-20440764	MAS,PLA,QUAD
chr10:20440829-20443217	GAS,MAS,PLA,QUAD
chr10:20443370-20479674	GAS,MAS,PLA,QUAD
chr10:20479759-20619129	GAS,MAS,PLA,QUAD
chr10:20619191-20724675	GAS,MAS,PLA,QUAD
chr10:21307780-21336966	GAS,MAS,PLA,QUAD
chr10:21337076-21341713	GAS,MAS,PLA,QUAD
chr10:21341980-21342398	GAS,MAS,PLA,QUAD
chr10:21342565-21345076	GAS,MAS,PLA,QUAD
chr10:21345195-21347261	GAS,MAS,PLA,QUAD
chr10:21347409-21349311	GAS,MAS,PLA,QUAD
chr10:21349387-21351926	GAS,MAS,PLA,QUAD
chr10:21352045-21352541	GAS,MAS,PLA,QUAD
chr10:21352611-21354638	GAS,MAS,PLA,QUAD
chr10:21354744-21358312	GAS,MAS,PLA,QUAD
chr10:21358404-21358731	GAS,MAS,PLA,QUAD
chr10:21358841-21364674	GAS,MAS,PLA,QUAD
chr10:21364776-21367641	GAS,MAS,PLA,QUAD
chr10:21367787-21368288	GAS,MAS,PLA,QUAD
chr10:21686504-21691581	DIA
chr10:21994826-21994965	GAS,MAS,PLA,QUAD
chr10:21995042-21995473	GAS,MAS,PLA,QUAD
chr10:21995550-21995793	GAS,MAS,PLA,QUAD
chr10:21995899-21996025	GAS,MAS,PLA,QUAD
chr10:21996110-21996222	GAS,MAS,PLA,QUAD
chr10:21996355-21996558	GAS,MAS,PLA,QUAD
chr10:21996672-21996978	GAS,MAS,PLA,QUAD
chr10:21997103-21997341	GAS,MAS,PLA,QUAD
chr10:21997438-21997897	GAS,MAS,PLA,QUAD
chr10:21998054-21998159	GAS,PLA,QUAD
chr10:21998250-21998659	GAS,MAS,PLA,QUAD
chr10:22186487-22186758	FDB
chr10:22187144-22199384	GAS
chr10:22265351-22302412	GAS,MAS,PLA,QUAD
chr10:22665707-22692134	MAS
chr10:22705896-22707588	GAS,MAS,PLA,QUAD
chr10:22707684-22707770	GAS,MAS,PLA,QUAD
chr10:22707875-22709145	GAS,MAS,PLA,QUAD
chr10:22709210-22709356	GAS,MAS,PLA,QUAD
chr10:22709440-22711913	GAS,MAS,PLA,QUAD
chr10:23106289-23109831	GAS,MAS,PLA,QUAD
chr10:23109933-23111559	GAS,MAS,PLA,QUAD
chr10:23111682-23113909	GAS,MAS,PLA,QUAD
chr10:23114025-23116552	GAS,MAS,PLA,QUAD
chr10:23116714-23116819	GAS
chr10:23116879-23123851	GAS,MAS,PLA,QUAD
chr10:23123942-23138190	GAS,MAS,PLA,QUAD
chr10:23138275-23139960	GAS,MAS,PLA,QUAD
chr10:23140098-23151931	GAS,MAS,PLA,QUAD
chr10:23152098-23155919	GAS,MAS,PLA,QUAD
chr10:23156000-23157251	MAS,PLA
chr10:23157655-23159087	GAS,MAS,PLA,QUAD
chr10:23159155-23163393	GAS,MAS,PLA
chr10:23163487-23171625	GAS,MAS
chr10:23173124-23226801	GAS,MAS,PLA,QUAD
chr10:23226852-23323047	GAS,MAS,PLA,QUAD
chr10:23323147-23349761	GAS,MAS,PLA,QUAD
chr10:23786005-23786624	AOR
chr10:23803854-23804187	QUAD
chr10:24155385-24177165	GAS,MAS,PLA,QUAD
chr10:24177236-24179116	GAS,MAS,PLA,QUAD
chr10:24179211-24179925	GAS,MAS,PLA,QUAD
chr10:24180064-24180862	GAS,MAS,PLA
chr10:24180916-24181517	GAS,MAS,PLA,QUAD
chr10:24181615-24182768	GAS,MAS,PLA,QUAD
chr10:24182842-24184986	GAS,MAS,PLA,QUAD
chr10:24185070-24187627	GAS,MAS,PLA,QUAD
chr10:24596944-24597314	GAS,MAS,PLA
chr10:24596944-24597317	AA,AOR
chr10:24645441-24647152	GAS
chr10:24649374-24651244	MAS
chr10:24652887-24653902	MAS
chr10:24674676-24675977	GAS
chr10:24774940-24776760	MAS
chr10:24798281-24799157	GAS,MAS
chr10:24903832-24904260	GAS,MAS,QUAD
chr10:24910866-24912662	GAS
chr10:25220759-25239625	GAS,MAS,PLA,QUAD
chr10:25267469-25271504	GAS,MAS,PLA,QUAD
chr10:25271642-25283892	GAS,MAS,QUAD
chr10:25284042-25289598	GAS,PLA
chr10:25442058-25443741	GAS,MAS
chr10:25443955-25460791	GAS,MAS
chr10:25460897-25468095	GAS
chr10:25468139-25469195	MAS,QUAD
chr10:25469272-25471418	MAS,QUAD
chr10:25471638-25473075	GAS,MAS
chr10:25479162-25479667	GAS,MAS,PLA
chr10:25479766-25484207	GAS,MAS,PLA,QUAD
chr10:25504260-25506174	GAS,MAS,PLA,QUAD
chr10:25506274-25507776	GAS,MAS,PLA,QUAD
chr10:25507858-25512972	GAS,MAS,PLA
chr10:26280414-26282779	MAS
chr10:26282860-26292640	MAS,PLA
chr10:26772697-26845931	MAS
chr10:26846129-26849874	GAS,MAS
chr10:26860733-26869920	MAS
chr10:26877235-26878890	GAS,MAS,QUAD
chr10:26889873-26912606	MAS
chr10:26912732-26916392	GAS
chr10:26916455-26917004	QUAD
chr10:26990962-26992912	GAS,MAS,PLA,QUAD
chr10:26993103-26993402	GAS,PLA
chr10:26993516-27000716	MAS,PLA
chr10:27000886-27001125	GAS,MAS,PLA,QUAD
chr10:27001303-27006679	GAS,PLA,QUAD
chr10:27006829-27015378	GAS,MAS,PLA,QUAD
chr10:27015556-27018406	GAS,MAS,PLA,QUAD
chr10:27018528-27021460	GAS,MAS,PLA,QUAD
chr10:27021473-27023271	GAS,MAS,PLA,QUAD
chr10:27023411-27030169	GAS,MAS,PLA,QUAD
chr10:27030315-27031020	GAS,MAS,PLA,QUAD
chr10:27031184-27035956	GAS,MAS,PLA,QUAD
chr10:27036082-27041072	GAS,MAS
chr10:27041233-27043538	GAS,MAS
chr10:27043673-27044434	GAS,MAS,PLA,QUAD
chr10:27044579-27050197	GAS,MAS,PLA,QUAD
chr10:27050353-27053027	GAS,MAS,PLA
chr10:27053034-27054502	GAS,MAS,PLA,QUAD
chr10:27056646-27070265	GAS
chr10:27104268-27105106	GAS,MAS,PLA,QUAD
chr10:27105224-27118478	GAS,MAS,PLA,QUAD
chr10:27118690-27119907	GAS,PLA
chr10:27120071-27124465	GAS,PLA
chr10:27124578-27133966	QUAD
chr10:27184502-27187745	GAS,QUAD
chr10:27190722-27197297	GAS
chr10:27224070-27231574	GAS,MAS
chr10:27235827-27236018	FDB
chr10:27235827-27243670	MAS
chr10:27243783-27264917	MAS
chr10:27265130-27266608	GAS
chr10:27344574-27346994	GAS
chr10:27347095-27350252	MAS
chr10:27350432-27363542	GAS,PLA
chr10:28573405-28574818	GAS,MAS
chr10:28589060-28589258	MAS
chr10:28972680-28973849	MAS
chr10:28972680-28981485	TON
chr10:28974089-28981485	MAS
chr10:28981587-28982420	MAS
chr10:28982606-28983927	MAS
chr10:28984015-28984127	MAS,TON
chr10:28984015-28984943	TON
chr10:28984015-28985991	MAS
chr10:29211867-29218040	MAS
chr10:29211867-29218054	PLA
chr10:29218297-29221785	GAS,MAS,PLA,QUAD
chr10:29222131-29222220	GAS,MAS,PLA,QUAD
chr10:29222301-29224234	GAS,MAS,PLA,QUAD
chr10:29225415-29227206	GAS,MAS,PLA,QUAD
chr10:29317723-29322274	GAS,MAS,PLA,QUAD
chr10:29322418-29331818	GAS,MAS,PLA,QUAD
chr10:29331872-29334190	GAS,MAS,PLA,QUAD
chr10:29334272-29344340	GAS,MAS,PLA,QUAD
chr10:29347884-29354291	GAS,MAS,PLA,QUAD
chr10:29354448-29361284	MAS
chr10:30535245-30547656	MAS
chr10:30559051-30559163	GAS,MAS,PLA
chr10:30559237-30560817	GAS
chr10:30560983-30566425	GAS,MAS,PLA
chr10:30587596-30590024	GAS,MAS
chr10:30590160-30590842	GAS
chr10:30590936-30591020	MAS
chr10:30591103-30594114	GAS,MAS,QUAD
chr10:30608424-30610316	GAS,MAS,PLA,QUAD
chr10:30610444-30611647	GAS,MAS,PLA,QUAD
chr10:30611718-30614712	GAS,MAS,PLA,QUAD
chr10:30614831-30618202	PLA
chr10:31314637-31316292	GAS,MAS,PLA,QUAD
chr10:31316396-31320267	GAS,MAS,PLA,QUAD
chr10:31320337-31326021	GAS,MAS,PLA,QUAD
chr10:31326161-31327880	GAS,MAS,PLA,QUAD
chr10:31332970-31338184	GAS,QUAD
chr10:31332970-31346610	GAS,MAS,PLA,QUAD
chr10:31346713-31357871	GAS,MAS,PLA,QUAD
chr10:31358021-31379214	GAS,MAS,PLA,QUAD
chr10:31379331-31445711	MAS
chr10:31502732-31503750	GAS,MAS
chr10:31503823-31505772	GAS,MAS,QUAD
chr10:31505975-31517383	GAS,MAS,PLA,QUAD
chr10:31517549-31534662	GAS,MAS,PLA,QUAD
chr10:31534897-31608383	MAS
chr10:33083746-33139073	GAS,MAS,PLA,QUAD
chr10:33139284-33157012	GAS,MAS,PLA,QUAD
chr10:33157175-33158245	GAS,MAS,PLA,QUAD
chr10:33158279-33175768	GAS,MAS,PLA,QUAD
chr10:33175829-33183953	GAS,MAS,PLA,QUAD
chr10:33184017-33186640	GAS,MAS,PLA,QUAD
chr10:33186701-33195948	GAS,MAS,PLA,QUAD
chr10:33196126-33200162	GAS,MAS,PLA,QUAD
chr10:33200223-33233854	GAS,MAS,PLA,QUAD
chr10:33233927-33257074	GAS,MAS,PLA,QUAD
chr10:33257138-33258086	GAS,MAS,PLA,QUAD
chr10:33258141-33305036	GAS,MAS,PLA,QUAD
chr10:33305091-33321304	GAS,MAS,PLA,QUAD
chr10:33321335-33332435	GAS,MAS,PLA,QUAD
chr10:33332466-33333231	GAS,MAS,PLA,QUAD
chr10:33333250-33334981	GAS,MAS,PLA,QUAD
chr10:33335015-33335139	GAS,MAS,PLA,QUAD
chr10:33335167-33337512	GAS,MAS,PLA,QUAD
chr10:33337540-33343075	GAS,MAS,PLA,QUAD
chr10:33343124-33363977	GAS,MAS,PLA,QUAD
chr10:33364023-33398380	GAS,MAS,PLA,QUAD
chr10:33398432-33399094	GAS,MAS,PLA,QUAD
chr10:33398432-33437717	DIA,EDL,EYE,FDB,GAS,MAS,PLA,QUAD,SOL,TAN,TON
chr10:33399146-33433700	GAS,MAS,PLA,QUAD
chr10:33433731-33437717	GAS,MAS,PLA,QUAD
chr10:33437748-33438791	GAS,MAS,PLA,QUAD
chr10:33438819-33439174	GAS,MAS,PLA,QUAD
chr10:33439223-33442887	GAS,MAS,PLA,QUAD
chr10:33442933-33444053	GAS,MAS,PLA,QUAD
chr10:33444075-33444723	GAS,MAS,PLA,QUAD
chr10:33444751-33445419	GAS,MAS,PLA,QUAD
chr10:33445459-33446987	GAS,MAS,PLA,QUAD
chr10:33447033-33450978	GAS,MAS,PLA,QUAD
chr10:33447033-33450981	FDB,QUAD
chr10:33451003-33464557	GAS,MAS,PLA,QUAD
chr10:33464597-33466422	GAS,MAS,PLA,QUAD
chr10:33464597-33466425	EDL,FDB,GAS,MAS,PLA,QUAD,SOL,TAN
chr10:33466462-33468155	GAS,MAS,PLA,QUAD
chr10:33466462-33468158	DIA,EDL,EYE,FDB,GAS,MAS,PLA,QUAD,SOL,TAN,TON
chr10:33468195-33471565	GAS,MAS,PLA,QUAD
chr10:33471605-33474378	GAS,MAS,PLA,QUAD
chr10:33927622-33928011	MAS,QUAD
chr10:33928164-33929820	GAS
chr10:33930345-33935088	GAS,MAS
chr10:33940280-33943649	QUAD
chr10:33943761-33948928	PLA
chr10:34012138-34019365	GAS,MAS,PLA
chr10:3425767-3463388	GAS,PLA,QUAD
chr10:34304980-34310300	GAS,MAS,QUAD
chr10:34322707-34324287	MAS
chr10:34398199-34399737	GAS
chr10:36628411-36701929	GAS,MAS,PLA,QUAD
chr10:36702035-36828670	MAS,PLA
chr10:36828810-36832577	MAS
chr10:36985240-36986306	GAS,MAS,PLA,QUAD
chr10:36986425-36988079	GAS,MAS,PLA,QUAD
chr10:36988155-36989149	GAS,MAS,PLA,QUAD
chr10:36989289-36991756	GAS,MAS,PLA,QUAD
chr10:36991899-36993607	GAS,MAS,PLA,QUAD
chr10:36993701-36993775	GAS,MAS,PLA,QUAD
chr10:36993885-36996988	GAS,MAS,PLA,QUAD
chr10:36997130-36997393	GAS,MAS,PLA,QUAD
chr10:36997503-36997966	GAS,MAS,PLA,QUAD
chr10:36998098-36998413	GAS,MAS,PLA,QUAD
chr10:36998570-37000368	GAS,MAS,PLA,QUAD
chr10:37000427-37001528	GAS,MAS,PLA,QUAD
chr10:39042693-39045652	GAS
chr10:39053858-39056776	GAS
chr10:39056926-39060126	GAS,MAS
chr10:39074288-39074663	MAS
chr10:39078852-39080481	GAS,MAS,PLA,QUAD
chr10:39080625-39082727	PLA
chr10:39082867-39083268	GAS,MAS
chr10:39087387-39088286	GAS,MAS,PLA,QUAD
chr10:39088452-39088758	QUAD
chr10:39088907-39092129	GAS,MAS,PLA,QUAD
chr10:39092318-39094894	GAS,MAS,PLA,QUAD
chr10:39095085-39097082	GAS,MAS,PLA,QUAD
chr10:39097239-39098326	GAS,MAS,PLA
chr10:39098487-39103487	GAS,MAS,PLA,QUAD
chr10:39103619-39105136	GAS,MAS,PLA
chr10:39105231-39105961	GAS,MAS,PLA,QUAD
chr10:39106082-39109887	GAS,MAS,PLA,QUAD
chr10:39120397-39122176	GAS,QUAD
chr10:39522853-39525400	MAS
chr10:39533711-39533808	MAS
chr10:39533963-39551386	GAS,MAS
chr10:39551519-39563763	GAS,MAS
chr10:39641395-39645707	GAS
chr10:39645777-39646848	MAS
chr10:39805705-39806661	MAS
chr10:39806747-39806834	GAS
chr10:39806984-39813970	GAS
chr10:39825259-39827709	GAS
chr10:39828606-39830898	GAS,MAS,PLA,QUAD
chr10:39830982-39832517	GAS,QUAD
chr10:39832644-39835159	GAS,MAS,PLA,QUAD
chr10:39835353-39836625	GAS,MAS,PLA,QUAD
chr10:39836738-39838441	GAS,QUAD
chr10:39838558-39840884	GAS,PLA,QUAD
chr10:39841004-39843410	GAS,MAS,PLA,QUAD
chr10:39846284-39846668	GAS,MAS,PLA,QUAD
chr10:39846914-39847974	GAS,PLA,QUAD
chr10:39848084-39851866	GAS,QUAD
chr10:39852074-39854698	GAS,PLA,QUAD
chr10:39854809-39859106	GAS,QUAD
chr10:39859222-39862693	GAS,MAS,PLA,QUAD
chr10:39862832-39863737	GAS,MAS,PLA,QUAD
chr10:39863929-39864593	GAS,MAS,PLA,QUAD
chr10:39864841-39867292	GAS,MAS,PLA,QUAD
chr10:39867503-39874083	GAS,MAS,PLA,QUAD
chr10:39948124-39948999	GAS
chr10:40003590-40005977	MAS
chr10:40037405-40040598	GAS,MAS,PLA,QUAD
chr10:40040828-40056486	MAS
chr10:40056631-40076563	GAS,PLA,QUAD
chr10:40077018-40080662	GAS,MAS,PLA
chr10:40227662-40233107	GAS,MAS,PLA,QUAD
chr10:40249832-40251155	GAS,MAS,PLA,QUAD
chr10:40251270-40254263	GAS,MAS,PLA,QUAD
chr10:40254309-40254400	GAS,MAS,PLA,QUAD
chr10:40254465-40257212	GAS,MAS,PLA,QUAD
chr10:40394401-40434303	GAS,MAS,PLA,QUAD
chr10:40434415-40436071	GAS,MAS,PLA,QUAD
chr10:40436213-40454014	GAS,MAS,PLA,QUAD
chr10:40454073-40466637	GAS,QUAD
chr10:40466770-40469578	GAS,MAS,PLA,QUAD
chr10:40469723-40469885	GAS,MAS,PLA,QUAD
chr10:40469956-40475568	GAS,MAS,PLA,QUAD
chr10:40475642-40476156	GAS,MAS,PLA,QUAD
chr10:40476255-40476888	GAS,MAS,PLA,QUAD
chr10:40476968-40477701	GAS,MAS,PLA,QUAD
chr10:40631781-40632937	GAS,MAS,PLA,QUAD
chr10:40633047-40637344	GAS,MAS,PLA,QUAD
chr10:40637522-40647473	GAS,MAS,PLA,QUAD
chr10:40833357-40834175	GAS,MAS
chr10:40834321-40836287	QUAD
chr10:40836365-40841353	GAS,MAS,QUAD
chr10:40841488-40841699	GAS,MAS,PLA
chr10:40841816-40843041	GAS,MAS
chr10:40845007-40847129	GAS,MAS
chr10:40847205-40847923	GAS
chr10:40848064-40849744	MAS,QUAD
chr10:40849842-40850929	MAS
chr10:40851070-40852496	MAS,PLA
chr10:40852581-40857546	MAS,QUAD
chr10:41188700-41220898	GAS,QUAD
chr10:41220986-41226921	GAS,MAS,PLA,QUAD
chr10:41228303-41230006	GAS,PLA,QUAD
chr10:41230091-41232106	GAS,MAS,QUAD
chr10:41232255-41233551	GAS,QUAD
chr10:41233611-41240504	MAS
chr10:41240644-41251716	PLA
chr10:41253789-41254843	PLA
chr10:41254890-41256420	GAS,MAS,PLA
chr10:41258149-41263068	GAS,PLA
chr10:41263167-41263884	GAS,MAS,PLA
chr10:41264048-41265385	GAS
chr10:41267816-41270298	GAS,QUAD
chr10:41270448-41272957	MAS,QUAD
chr10:41273009-41277357	GAS
chr10:41277515-41285289	GAS
chr10:41479775-41480284	MAS
chr10:41482028-41482207	MAS
chr10:41484255-41484375	MAS
chr10:41484533-41484732	MAS
chr10:41486668-41486757	MAS
chr10:41487583-41487671	PLA
chr10:41488098-41488176	PLA
chr10:41488516-41488733	GAS,MAS
chr10:41488824-41488930	GAS,PLA,QUAD
chr10:41489025-41489274	MAS
chr10:41489352-41489463	GAS
chr10:41519701-41521917	MAS
chr10:41522008-41523172	GAS,MAS,PLA,QUAD
chr10:41523245-41524106	GAS,MAS,PLA,QUAD
chr10:41524146-41526826	GAS,MAS,PLA,QUAD
chr10:41526884-41528671	GAS,MAS,PLA,QUAD
chr10:41811301-41894041	PLA
chr10:41894108-41894819	MAS
chr10:41895021-41896022	GAS,MAS,PLA,QUAD
chr10:41896206-41898182	GAS,MAS,PLA,QUAD
chr10:41902677-41903691	GAS,MAS,PLA
chr10:41903805-41905173	GAS,MAS,PLA,QUAD
chr10:41905365-41906335	GAS,MAS,PLA,QUAD
chr10:41906481-41907271	GAS,MAS,QUAD
chr10:42186296-42196465	MAS
chr10:42313617-42316349	GAS
chr10:42316464-42318591	GAS,MAS,PLA,QUAD
chr10:42318733-42339824	GAS,MAS,PLA
chr10:42339926-42340181	GAS,MAS,PLA,QUAD
chr10:42340253-42360164	GAS,MAS,PLA,QUAD
chr10:42360248-42400340	GAS,MAS,PLA,QUAD
chr10:42400400-42415548	GAS,MAS,PLA,QUAD
chr10:42415649-42425177	GAS,MAS,PLA,QUAD
chr10:42425309-42426485	GAS,MAS,PLA,QUAD
chr10:42426588-42438353	GAS,MAS,PLA,QUAD
chr10:42438406-42454306	GAS,MAS,PLA,QUAD
chr10:42502493-42525953	PLA
chr10:42526050-42533148	GAS,MAS,PLA,QUAD
chr10:42533274-42534652	GAS,MAS,PLA,QUAD
chr10:42683275-42692910	GAS,MAS,PLA,QUAD
chr10:42693009-42696249	GAS,MAS,PLA,QUAD
chr10:42696418-42698107	GAS,MAS,PLA,QUAD
chr10:42698274-42700482	GAS,MAS,PLA,QUAD
chr10:42783542-42789299	GAS,MAS,PLA,QUAD
chr10:42789415-42791178	GAS,MAS,PLA,QUAD
chr10:42791292-42794774	GAS,MAS,PLA,QUAD
chr10:42794837-42796205	GAS,MAS,PLA,QUAD
chr10:42796265-42797682	GAS,MAS,QUAD
chr10:42797734-42798746	GAS,MAS,PLA,QUAD
chr10:42798856-42801632	GAS,MAS,PLA,QUAD
chr10:42801728-42801821	GAS,MAS,PLA,QUAD
chr10:42801955-42803889	GAS,MAS,PLA,QUAD
chr10:42803983-42805075	GAS,MAS,PLA
chr10:42805231-42806523	GAS
chr10:42806672-42810842	GAS,MAS,PLA,QUAD
chr10:42810926-42812435	GAS,MAS,PLA,QUAD
chr10:42812496-42812664	GAS,MAS,PLA
chr10:42812839-42815054	GAS,MAS,PLA,QUAD
chr10:42815214-42816367	GAS,MAS,PLA,QUAD
chr10:42816470-42823880	GAS,MAS,PLA,QUAD
chr10:42823980-42827876	GAS,MAS,PLA,QUAD
chr10:42827982-42828890	GAS,MAS,PLA,QUAD
chr10:43022919-43074592	GAS,MAS,PLA,QUAD
chr10:43074689-43127778	GAS,MAS,PLA,QUAD
chr10:43127931-43157907	GAS,MAS,PLA,QUAD
chr10:43158094-43160705	GAS,MAS,PLA,QUAD
chr10:43160845-43173975	GAS,MAS,PLA,QUAD
chr10:43345727-43372134	GAS,MAS,PLA,QUAD
chr10:43372210-43393870	GAS,MAS,PLA,QUAD
chr10:43394045-43395560	GAS,MAS,PLA,QUAD
chr10:43395693-43413514	GAS,MAS,PLA,QUAD
chr10:43413548-43439798	GAS,MAS,PLA,QUAD
chr10:43525409-43530597	GAS,MAS,PLA,QUAD
chr10:43530671-43532675	GAS,MAS,PLA,QUAD
chr10:43874707-43876471	GAS,MAS,PLA,QUAD
chr10:43876678-43881472	GAS,MAS,QUAD
chr10:43881591-43882065	GAS,MAS,PLA,QUAD
chr10:43882259-43884748	GAS,MAS,PLA,QUAD
chr10:43884862-43884942	GAS,MAS,PLA,QUAD
chr10:43889137-43894514	GAS,MAS,PLA,QUAD
chr10:43894612-43895433	GAS,MAS,PLA,QUAD
chr10:43895533-43896008	GAS,MAS,PLA,QUAD
chr10:43902537-43907758	GAS,MAS,PLA,QUAD
chr10:43907911-43909906	MAS,PLA,QUAD
chr10:43909976-43910792	GAS,MAS,PLA,QUAD
chr10:43910918-43921386	MAS,PLA
chr10:43921436-43928322	GAS,MAS,PLA,QUAD
chr10:43928460-43932362	GAS,MAS,PLA,QUAD
chr10:43932547-43935998	GAS,MAS,PLA,QUAD
chr10:43936092-43946420	GAS,MAS,PLA,QUAD
chr10:43961569-43964577	MAS
chr10:43967816-43973657	MAS
chr10:43973804-43973893	MAS
chr10:4413416-4414391	AA,AOR
chr10:44286198-44289862	GAS,QUAD
chr10:44289991-44294595	GAS,QUAD
chr10:44294675-44303566	GAS,MAS,PLA,QUAD
chr10:44303730-44319459	GAS,MAS,PLA,QUAD
chr10:44319555-44346956	GAS,MAS,QUAD
chr10:44347075-44362915	MAS,PLA
chr10:4439737-4450646	GAS,MAS,PLA,QUAD
chr10:45091127-45092661	GAS,MAS,PLA,QUAD
chr10:45092793-45094980	GAS,MAS,QUAD
chr10:45095191-45097392	GAS,MAS,PLA
chr10:45097515-45107771	MAS,PLA
chr10:45107878-45115062	GAS,MAS,PLA,QUAD
chr10:45115255-45120642	GAS,MAS,PLA,QUAD
chr10:45120841-45125963	GAS,MAS,QUAD
chr10:45126068-45147984	GAS,MAS,PLA,QUAD
chr10:45148122-45150435	GAS,MAS,QUAD
chr10:45150531-45153054	MAS,PLA
chr10:45153187-45155515	MAS,PLA
chr10:45155673-45158231	GAS,MAS,PLA,QUAD
chr10:45315280-45316430	GAS,MAS,PLA,QUAD
chr10:45316540-45317698	GAS,MAS,PLA,QUAD
chr10:45339457-45343033	GAS,MAS,PLA,QUAD
chr10:45343159-45346126	GAS,MAS,PLA,QUAD
chr10:45346315-45347784	GAS,MAS,PLA,QUAD
chr10:45346315-45347843	TAN
chr10:45347894-45353749	GAS,MAS,PLA,QUAD
chr10:45353918-45354750	GAS,MAS,PLA,QUAD
chr10:45354893-45369190	MAS
chr10:45701025-45709880	MAS
chr10:45709995-45711433	GAS,MAS,QUAD
chr10:4939351-4969158	GAS
chr10:4969293-4997829	GAS
chr10:4998014-5001188	PLA
chr10:5022248-5030375	GAS,MAS,PLA,QUAD
chr10:5030435-5031765	GAS,MAS,PLA,QUAD
chr10:5031859-5032916	GAS,MAS,PLA,QUAD
chr10:5033130-5034932	GAS,MAS,PLA,QUAD
chr10:5035062-5037215	GAS,MAS,PLA,QUAD
chr10:5037417-5040763	MAS,PLA
chr10:5040976-5041460	MAS,PLA
chr10:5041585-5043610	GAS,MAS,PLA
chr10:5043754-5045265	GAS
chr10:5043754-5047530	GAS
chr10:5045335-5047530	MAS
chr10:5047859-5048723	MAS,PLA
chr10:5048916-5052274	GAS,MAS,PLA,QUAD
chr10:5052413-5052655	MAS
chr10:5052839-5056376	MAS,PLA
chr10:5057968-5061388	GAS,MAS,PLA,QUAD
chr10:5061552-5072036	GAS,MAS,PLA,QUAD
chr10:50642731-50644942	GAS,QUAD
chr10:50645085-50645662	GAS
chr10:50645789-50649108	GAS,QUAD
chr10:50649310-50649792	GAS
chr10:50660727-50690114	QUAD
chr10:50690250-50699939	QUAD
chr10:50700132-50700431	GAS,QUAD
chr10:50700657-50707662	GAS
chr10:50711045-50713175	GAS,QUAD
chr10:50713263-50714265	GAS,QUAD
chr10:50714443-50716484	GAS
chr10:50716711-50718291	QUAD
chr10:50720711-50721772	GAS
chr10:50721942-50728089	GAS,PLA,QUAD
chr10:5072204-5075788	GAS,MAS,PLA,QUAD
chr10:50728311-50729911	GAS,MAS
chr10:50729998-50731612	GAS
chr10:50731780-50732421	GAS,PLA,QUAD
chr10:50732568-50732686	GAS,MAS,QUAD
chr10:50732808-50735209	GAS,MAS,PLA
chr10:50735353-50748805	GAS,QUAD
chr10:50748944-50749034	MAS,PLA
chr10:50749156-50750452	GAS,MAS
chr10:50750586-50753996	GAS,MAS,QUAD
chr10:5075948-5083823	MAS,PLA
chr10:50767203-50767372	GAS,MAS,QUAD
chr10:50767508-50823635	GAS,MAS,PLA,QUAD
chr10:5083980-5086667	GAS,MAS,PLA,QUAD
chr10:50840450-50842142	GAS,MAS,PLA
chr10:50845741-50849470	GAS,MAS,QUAD
chr10:50849647-50850460	GAS,MAS,PLA,QUAD
chr10:5097680-5099359	MAS
chr10:5099595-5102329	MAS,PLA,QUAD
chr10:5102425-5103635	GAS
chr10:5103784-5104813	GAS,MAS,PLA,QUAD
chr10:5104969-5107812	MAS
chr10:5108705-5110830	GAS,MAS,PLA
chr10:5111036-5111374	GAS,MAS,QUAD
chr10:5111509-5113949	PLA
chr10:5114121-5116966	GAS,MAS
chr10:5117123-5122980	GAS,MAS,PLA,QUAD
chr10:5123137-5123654	MAS
chr10:5123832-5124813	GAS,MAS,PLA
chr10:5124964-5126659	MAS
chr10:5126843-5127193	MAS
chr10:5127327-5128379	GAS,MAS
chr10:5128577-5130009	GAS,MAS,QUAD
chr10:5130142-5131907	GAS
chr10:5132082-5140811	GAS,MAS,PLA,QUAD
chr10:5141013-5143149	MAS
chr10:5143270-5146252	GAS,MAS,PLA
chr10:5146355-5153098	GAS,MAS,PLA,QUAD
chr10:51485781-51485887	GAS
chr10:51496060-51496166	MAS
chr10:5153309-5153862	MAS,PLA
chr10:5154019-5154463	GAS,MAS,PLA
chr10:5154596-5157620	GAS,MAS
chr10:5185558-5185752	GAS,MAS
chr10:5194668-5201995	AA
chr10:52022804-52025056	GAS,MAS,PLA,QUAD
chr10:52025364-52027430	GAS,MAS,PLA
chr10:52025364-52027433	MAS,PLA,QUAD
chr10:5205078-5205247	AA,LV,TA
chr10:5211037-5211939	AA
chr10:5215345-5215668	AA,GAS,LV,MAS,SOL,TA
chr10:5222008-5222182	AOR
chr10:52339854-52346048	GAS,MAS,PLA,QUAD
chr10:52346230-52349071	MAS,PLA
chr10:52353493-52354571	MAS
chr10:52354748-52357341	MAS
chr10:52429319-52430066	GAS,MAS,PLA,QUAD
chr10:52430217-52433344	GAS,MAS,PLA,QUAD
chr10:52433445-52436576	GAS,MAS,PLA,QUAD
chr10:53278245-53281348	GAS,MAS,PLA,QUAD
chr10:53281581-53283836	GAS,MAS,PLA,QUAD
chr10:53283945-53291763	GAS,MAS,PLA,QUAD
chr10:53291815-53292257	GAS,MAS,PLA,QUAD
chr10:53292376-53296213	GAS,MAS,PLA,QUAD
chr10:53298206-53301501	GAS,MAS,PLA,QUAD
chr10:53301682-53312507	GAS,MAS
chr10:53312626-53319597	GAS,MAS,PLA,QUAD
chr10:53319720-53348471	GAS,MAS,PLA
chr10:53344673-53344766	LV,RV
chr10:53349260-53358048	GAS,MAS,PLA
chr10:53597299-53602347	GAS,MAS,PLA,QUAD
chr10:53602464-53606108	GAS,MAS
chr10:53606286-53607664	GAS,MAS,PLA,QUAD
chr10:53907564-53907942	MAS
chr10:53919331-53920042	MAS
chr10:53920263-53925429	MAS
chr10:53925546-53933491	GAS,MAS,PLA,QUAD
chr10:53933586-53934888	MAS
chr10:53935013-53977022	MAS
chr10:53977118-54014414	GAS,MAS
chr10:54025830-54030697	MAS
chr10:5593902-5604186	GAS,MAS,PLA
chr10:56828791-56828899	AOR,ATR,DIA,EDL,EYE,LV,MAS,RV,SOL,TAN,TON
chr10:56828792-56828899	AOR,DIA,EDL,EYE,LV,MAS,PLA,QUAD,SOL,TAN,TON
chr10:56828793-56828899	TAN
chr10:56970862-56972489	LV,RV
chr10:56972614-56982063	LV,RV
chr10:57486602-57495897	PLA
chr10:57496007-57496154	GAS,MAS,PLA,QUAD
chr10:57496283-57497496	GAS,MAS,PLA,QUAD
chr10:57497622-57499415	GAS,MAS,PLA,QUAD
chr10:57499492-57501369	GAS,PLA,QUAD
chr10:57501432-57502622	GAS,MAS,PLA,QUAD
chr10:57502711-57504581	GAS,MAS,PLA,QUAD
chr10:57504731-57505145	GAS,MAS,PLA,QUAD
chr10:57505383-57506196	GAS,MAS,PLA
chr10:57506303-57509060	GAS,MAS,PLA,QUAD
chr10:57506303-57511443	GAS,MAS,PLA,QUAD
chr10:57509115-57511443	GAS,MAS,PLA,QUAD
chr10:57511529-57511902	GAS,MAS,PLA,QUAD
chr10:57517293-57519362	GAS,MAS,PLA,QUAD
chr10:57519594-57519697	GAS,MAS,PLA,QUAD
chr10:57519843-57522955	GAS,MAS,PLA,QUAD
chr10:57523217-57523960	GAS,MAS,PLA,QUAD
chr10:57524099-57524319	GAS,MAS,PLA,QUAD
chr10:57524400-57525324	GAS,MAS,PLA,QUAD
chr10:57525495-57527664	GAS,MAS,PLA,QUAD
chr10:57801125-57802419	GAS,MAS,PLA,QUAD
chr10:57802565-57805566	GAS,MAS,PLA,QUAD
chr10:57805664-57807354	GAS,MAS,PLA,QUAD
chr10:57807525-57807876	GAS,MAS,PLA,QUAD
chr10:57808058-57809045	GAS,MAS,PLA,QUAD
chr10:57809171-57811212	GAS,MAS,PLA,QUAD
chr10:5813407-5814040	GAS,MAS,PLA,QUAD
chr10:5817613-5818800	QUAD
chr10:5818985-5820024	PLA
chr10:58268072-58269261	MAS
chr10:58271707-58272332	GAS
chr10:58272406-58274735	GAS,PLA,QUAD
chr10:58274837-58274935	GAS,MAS,QUAD
chr10:58275035-58276577	QUAD
chr10:58276698-58278786	GAS,MAS
chr10:58278952-58280591	GAS,MAS,PLA,QUAD
chr10:58280697-58281356	GAS,MAS,PLA,QUAD
chr10:58281520-58285942	GAS,MAS,QUAD
chr10:58286044-58286132	GAS,MAS,PLA,QUAD
chr10:58286211-58287141	GAS,MAS,QUAD
chr10:58290477-58292564	GAS,MAS
chr10:58292783-58294710	GAS,MAS,PLA,QUAD
chr10:58294906-58296087	MAS
chr10:58296240-58298663	QUAD
chr10:58394601-58399020	PLA
chr10:58408137-58409559	GAS,MAS,PLA,QUAD
chr10:58409681-58410052	GAS,PLA
chr10:58410203-58412402	GAS,MAS,PLA,QUAD
chr10:58412554-58413972	GAS,MAS
chr10:58414066-58416633	GAS,MAS,PLA,QUAD
chr10:58416683-58418398	GAS,MAS,PLA,QUAD
chr10:58418475-58418646	GAS,MAS,PLA,QUAD
chr10:58418475-58421453	GAS,MAS,PLA,QUAD
chr10:58418836-58421453	DIA,FDB,GAS,LV,MAS,QUAD,RV,SOL,TON
chr10:58454726-58455218	GAS,QUAD
chr10:58457785-58460517	GAS,MAS
chr10:58460606-58461835	GAS
chr10:58464001-58464082	GAS,MAS,QUAD
chr10:58464259-58464404	GAS,MAS
chr10:58464529-58465064	MAS
chr10:58465227-58465443	MAS
chr10:58467295-58467389	GAS,MAS,QUAD
chr10:58467474-58470626	GAS
chr10:58475339-58476156	GAS,MAS,QUAD
chr10:58480820-58483028	GAS,MAS,PLA,QUAD
chr10:58481397-58483028	DIA,EDL,FDB,GAS,MAS,PLA,SOL,TAN,TON
chr10:58483200-58483896	GAS,MAS,PLA,QUAD
chr10:58483984-58484441	GAS,MAS,PLA,QUAD
chr10:58484621-58485679	GAS,MAS,PLA,QUAD
chr10:58485882-58488572	GAS,MAS,PLA,QUAD
chr10:58488675-58490609	GAS,MAS,PLA,QUAD
chr10:58490756-58492410	GAS,PLA,QUAD
chr10:58492685-58492801	GAS,MAS,PLA,QUAD
chr10:58493137-58493662	GAS,MAS,PLA,QUAD
chr10:59164945-59166503	GAS,MAS
chr10:59166692-59170813	GAS,MAS,PLA,QUAD
chr10:59170947-59176847	GAS
chr10:59177017-59178760	GAS,QUAD
chr10:59178858-59181019	GAS
chr10:59183712-59192165	GAS,PLA
chr10:59337157-59339295	GAS,MAS,PLA,QUAD
chr10:59339393-59342683	GAS,MAS,PLA,QUAD
chr10:59342836-59343656	GAS,MAS,PLA,QUAD
chr10:59343795-59348180	GAS,MAS,PLA,QUAD
chr10:59348421-59350403	GAS,MAS,PLA,QUAD
chr10:59350601-59352082	GAS,MAS,PLA,QUAD
chr10:59352260-59354339	GAS,MAS,PLA,QUAD
chr10:59352260-59355349	GAS,MAS,PLA,QUAD
chr10:59354411-59361860	GAS,MAS,PLA,QUAD
chr10:59355421-59361860	GAS,MAS,PLA,QUAD
chr10:59361961-59365288	GAS,MAS,PLA,QUAD
chr10:59365343-59367288	GAS,MAS,PLA,QUAD
chr10:59367355-59369240	GAS,MAS,PLA,QUAD
chr10:59369310-59369586	GAS,MAS,PLA,QUAD
chr10:59369684-59371003	GAS,MAS,PLA,QUAD
chr10:59448859-59451205	GAS,MAS,PLA,QUAD
chr10:59451323-59454945	GAS,MAS,PLA,QUAD
chr10:59455150-59456648	GAS,MAS,PLA
chr10:59456810-59466453	GAS,MAS,PLA
chr10:59728119-59732982	MAS,PLA
chr10:59733158-59740659	GAS,MAS,PLA,QUAD
chr10:59740823-59750503	GAS,MAS,PLA,QUAD
chr10:59750548-59756705	GAS,MAS,PLA,QUAD
chr10:59750548-59768137	GAS
chr10:59756718-59768137	GAS,MAS,PLA,QUAD
chr10:59768253-59787940	GAS,MAS,PLA,QUAD
chr10:59788024-59788878	GAS,MAS,PLA,QUAD
chr10:59789077-59827188	GAS,MAS,PLA,QUAD
chr10:59827327-59839674	GAS,MAS,PLA
chr10:59839784-59861562	GAS,MAS,PLA,QUAD
chr10:59861653-59863178	GAS,MAS,PLA,QUAD
chr10:59890209-59890839	PLA
chr10:59890986-59892671	GAS,MAS,PLA
chr10:59892858-59892937	GAS,MAS,PLA,QUAD
chr10:59893018-59894230	MAS
chr10:59894341-59895587	MAS
chr10:59895761-59896349	GAS,MAS,PLA,QUAD
chr10:59896448-59897490	GAS,MAS,PLA,QUAD
chr10:59896502-59897490	MAS
chr10:59988839-59990832	GAS,MAS,PLA,QUAD
chr10:59990908-59996447	GAS,MAS
chr10:60004928-60007726	GAS,MAS,PLA,QUAD
chr10:60012560-60013595	GAS,MAS
chr10:60013775-60042120	GAS,MAS,PLA,QUAD
chr10:60042258-60049751	GAS,MAS,PLA,QUAD
chr10:60049872-60062459	GAS,MAS,PLA,QUAD
chr10:60062585-60064322	MAS,PLA
chr10:60064409-60098092	GAS,MAS,PLA,QUAD
chr10:60078946-60098092	ATR
chr10:60098215-60099705	GAS,MAS,PLA,QUAD
chr10:60267176-60291638	EYE
chr10:60277783-60291638	MAS,PLA
chr10:60291773-60292504	GAS,MAS,PLA,QUAD
chr10:60292580-60293348	GAS,MAS,PLA,QUAD
chr10:60293475-60294532	GAS,MAS,PLA,QUAD
chr10:60294731-60294964	GAS,MAS,PLA,QUAD
chr10:60295109-60295945	GAS,MAS,PLA,QUAD
chr10:60296003-60299097	GAS,MAS,PLA,QUAD
chr10:60299230-60299463	GAS,MAS,PLA,QUAD
chr10:60299230-60299466	GAS,MAS,PLA,QUAD
chr10:60299560-60299778	GAS,MAS,PLA,QUAD
chr10:60300059-60300147	MAS,PLA
chr10:60300306-60300537	GAS,MAS,PLA,QUAD
chr10:60300619-60300773	GAS,MAS,PLA,QUAD
chr10:60300882-60301693	GAS,MAS,PLA,QUAD
chr10:61101009-61101680	GAS,MAS,QUAD
chr10:61101802-61102567	GAS,MAS,QUAD
chr10:61103360-61104462	GAS,MAS
chr10:61105521-61106264	QUAD
chr10:61106371-61107576	MAS
chr10:61107666-61112161	MAS
chr10:61114158-61117694	GAS
chr10:61323380-61339198	MAS
chr10:61348695-61350140	MAS
chr10:61433829-61434917	GAS,MAS,PLA,QUAD
chr10:61482483-61527059	MAS,PLA
chr10:61527210-61548047	GAS,MAS,PLA,QUAD
chr10:61548216-61580129	GAS,MAS,PLA,QUAD
chr10:61659503-61660911	GAS,MAS,PLA,QUAD
chr10:61661032-61663689	GAS,MAS,PLA,QUAD
chr10:61663777-61665339	GAS,MAS,PLA,QUAD
chr10:61665467-61666910	GAS,MAS,PLA,QUAD
chr10:61667039-61667584	GAS,MAS,PLA,QUAD
chr10:61667671-61670417	GAS,MAS,PLA,QUAD
chr10:61670488-61672390	GAS,MAS,PLA,QUAD
chr10:61672434-61673818	GAS,MAS,PLA,QUAD
chr10:61684954-61685065	GAS,PLA,QUAD
chr10:61685186-61685553	GAS,MAS,PLA,QUAD
chr10:61685620-61686374	GAS,MAS,PLA,QUAD
chr10:61686479-61689773	GAS,MAS,PLA,QUAD
chr10:61689906-61691284	GAS,MAS,PLA,QUAD
chr10:61728222-61732322	GAS,MAS,QUAD
chr10:61734430-61735457	MAS,PLA,QUAD
chr10:62188163-62188642	MAS,PLA
chr10:62189862-62191467	MAS
chr10:62191585-62193866	GAS,MAS,PLA,QUAD
chr10:62193963-62201777	GAS,MAS,PLA,QUAD
chr10:62270057-62271588	MAS
chr10:62271823-62274446	GAS,MAS
chr10:62274603-62275680	MAS
chr10:62429835-62430470	GAS,MAS,PLA,QUAD
chr10:62430620-62432288	GAS,MAS,PLA,QUAD
chr10:62432466-62433051	GAS,MAS,PLA,QUAD
chr10:62433133-62434394	MAS,PLA
chr10:62434615-62435458	GAS,MAS,QUAD
chr10:62435553-62435645	GAS,MAS,PLA
chr10:62435827-62437433	PLA,QUAD
chr10:62439052-62441134	GAS,MAS,PLA
chr10:62443564-62445038	GAS,MAS,PLA,QUAD
chr10:62445154-62447023	GAS,MAS,PLA,QUAD
chr10:62456859-62458923	GAS,MAS,PLA,QUAD
chr10:62459067-62463690	GAS,MAS,PLA,QUAD
chr10:62463760-62464631	GAS,MAS,PLA,QUAD
chr10:62464739-62468289	GAS,MAS,PLA,QUAD
chr10:62468455-62469900	GAS,MAS,PLA,QUAD
chr10:62470058-62471059	GAS,MAS,PLA,QUAD
chr10:62471136-62480557	GAS,MAS,PLA,QUAD
chr10:62495107-62497778	GAS,MAS,PLA,QUAD
chr10:62559884-62563235	GAS,MAS,PLA,QUAD
chr10:62563352-62566036	GAS,MAS,PLA,QUAD
chr10:62566122-62569458	GAS,MAS,PLA,QUAD
chr10:62569643-62570398	GAS,MAS,PLA,QUAD
chr10:62570479-62575049	GAS,MAS,PLA,QUAD
chr10:62585685-62587463	GAS,MAS,PLA,QUAD
chr10:62587538-62588003	GAS,MAS,PLA,QUAD
chr10:62588124-62588656	GAS,MAS,PLA,QUAD
chr10:62588819-62589777	GAS,MAS,PLA,QUAD
chr10:62589928-62590620	GAS,MAS,PLA,QUAD
chr10:62592003-62593009	GAS,MAS,PLA,QUAD
chr10:62593128-62593961	GAS,MAS,PLA,QUAD
chr10:62594141-62595035	GAS
chr10:62595112-62598231	GAS,MAS,PLA,QUAD
chr10:62598892-62602127	MAS,PLA
chr10:62621524-62624767	GAS,MAS,PLA,QUAD
chr10:62640007-62640446	GAS,MAS,PLA,QUAD
chr10:62643373-62646913	GAS,MAS,PLA,QUAD
chr10:62744823-62745262	GAS,MAS,PLA,QUAD
chr10:62745469-62746900	GAS,MAS,PLA,QUAD
chr10:62747087-62747343	GAS,MAS,PLA,QUAD
chr10:62747465-62750546	MAS
chr10:62750694-62750936	GAS,MAS,PLA,QUAD
chr10:62751017-62751742	GAS,MAS,PLA,QUAD
chr10:62753414-62756482	GAS,MAS,PLA,QUAD
chr10:62756675-62760093	GAS,MAS,PLA,QUAD
chr10:62760280-62763439	GAS,MAS,PLA,QUAD
chr10:62763524-62764323	GAS,PLA,QUAD
chr10:62764535-62765266	GAS,MAS
chr10:62765434-62765941	GAS,MAS,PLA,QUAD
chr10:62766056-62766556	GAS,MAS,PLA,QUAD
chr10:62766783-62770854	GAS,MAS,PLA
chr10:62771017-62771935	GAS,MAS,PLA,QUAD
chr10:62772066-62776567	GAS,MAS
chr10:62776761-62776848	GAS,MAS,PLA,QUAD
chr10:62776964-62780440	GAS,MAS,PLA,QUAD
chr10:62780635-62783233	MAS
chr10:62783267-62783882	GAS,MAS
chr10:62783928-62785430	MAS,PLA
chr10:62785595-62790920	GAS,MAS,PLA
chr10:62928389-62930302	GAS,PLA,QUAD
chr10:62930437-62932718	GAS,MAS,PLA,QUAD
chr10:62932783-62937417	GAS,MAS,PLA,QUAD
chr10:62937540-62937927	GAS,MAS,PLA,QUAD
chr10:62937995-62941041	GAS,MAS,PLA,QUAD
chr10:62941205-62942650	GAS,MAS,PLA,QUAD
chr10:62942720-62944314	GAS,MAS,PLA,QUAD
chr10:63000401-63002182	MAS
chr10:63009405-63011417	GAS
chr10:63011496-63011589	GAS,QUAD
chr10:63015715-63015801	GAS,MAS,PLA
chr10:63015895-63016079	GAS,MAS,PLA,QUAD
chr10:63016176-63016406	GAS,MAS,PLA,QUAD
chr10:63016543-63017221	GAS,MAS,PLA,QUAD
chr10:63017338-63017523	GAS,MAS,PLA,QUAD
chr10:63017611-63018040	GAS,MAS,PLA,QUAD
chr10:63017611-63018085	AA,AOR,ATR,DIA,EDL,EYE,FDB,GAS,LV,MAS,PLA,QUAD,RV,SOL,TA,TAN,TON
chr10:63018226-63018759	GAS,MAS,PLA,QUAD
chr10:63018226-63019392	GAS
chr10:63018899-63019392	GAS,MAS,PLA,QUAD
chr10:63117027-63118420	GAS,MAS,PLA,QUAD
chr10:63118555-63120028	GAS,MAS,PLA
chr10:63120195-63121901	GAS,MAS,PLA,QUAD
chr10:63122110-63123270	MAS,PLA
chr10:63123398-63125668	GAS,MAS,PLA,QUAD
chr10:63125749-63127627	GAS,MAS,PLA,QUAD
chr10:63127778-63130982	GAS,MAS,PLA,QUAD
chr10:63131205-63134932	GAS,MAS,PLA,QUAD
chr10:63135072-63135707	GAS,MAS,PLA,QUAD
chr10:63136296-63145835	GAS,MAS,PLA,QUAD
chr10:63146209-63147876	GAS,MAS,PLA,QUAD
chr10:63147994-63150022	GAS,MAS,PLA,QUAD
chr10:63150047-63152794	GAS,MAS,PLA,QUAD
chr10:63152937-63162221	GAS,MAS,PLA
chr10:63162294-63163512	GAS,MAS,PLA
chr10:63163625-63167232	GAS,MAS,PLA,QUAD
chr10:63167285-63169254	GAS,MAS,PLA,QUAD
chr10:63169431-63192386	GAS,MAS,PLA,QUAD
chr10:63193284-63203717	GAS,MAS,PLA,QUAD
chr10:63246126-63264025	GAS,MAS,PLA,QUAD
chr10:63264186-63269627	GAS,MAS,PLA
chr10:63269705-63273450	GAS,MAS,PLA,QUAD
chr10:63275089-63278334	GAS,MAS,PLA,QUAD
chr10:63278466-63283180	GAS,MAS
chr10:63283342-63285651	GAS,MAS,PLA,QUAD
chr10:63285729-63286016	GAS,MAS,PLA,QUAD
chr10:63286142-63287518	GAS,MAS,PLA,QUAD
chr10:63287579-63287897	GAS,MAS,PLA,QUAD
chr10:63288010-63289051	GAS,MAS,QUAD
chr10:63289242-63290503	GAS,MAS,PLA,QUAD
chr10:63290677-63299119	GAS,MAS,PLA,QUAD
chr10:63299240-63303844	GAS,PLA,QUAD
chr10:63303869-63306347	GAS
chr10:63306447-63307741	GAS,MAS,PLA,QUAD
chr10:63307910-63308306	GAS,MAS,PLA,QUAD
chr10:63308451-63311466	GAS,MAS,PLA,QUAD
chr10:63311634-63311847	GAS,MAS,PLA,QUAD
chr10:63311915-63314486	GAS,MAS,PLA,QUAD
chr10:63314570-63315659	GAS,MAS,PLA,QUAD
chr10:63315844-63316699	GAS,MAS,PLA,QUAD
chr10:63316803-63317279	GAS,MAS,PLA,QUAD
chr10:63320965-63321748	GAS,MAS,QUAD
chr10:63322301-63323966	GAS,MAS,PLA,QUAD
chr10:63324154-63325125	MAS
chr10:63326187-63331744	GAS,MAS,PLA,QUAD
chr10:63386776-63395784	PLA
chr10:63395864-63397238	GAS,MAS,PLA,QUAD
chr10:63397379-63407001	GAS,PLA,QUAD
chr10:63407207-63408188	GAS,MAS,PLA,QUAD
chr10:64834671-64873160	GAS
chr10:64873343-64945918	GAS
chr10:64946025-64959769	GAS,PLA
chr10:64959905-65002545	GAS,QUAD
chr10:67034713-67035884	QUAD
chr10:67036006-67039500	GAS,MAS,PLA,QUAD
chr10:67039578-67062998	GAS
chr10:67218182-67218276	MAS
chr10:67218470-67218953	GAS
chr10:67220636-67224008	GAS,MAS
chr10:67224182-67224736	GAS,MAS,QUAD
chr10:67230050-67231971	GAS,MAS,QUAD
chr10:67232187-67233370	GAS
chr10:67233524-67238107	MAS
chr10:67238198-67238806	GAS,MAS,PLA,QUAD
chr10:67238935-67239248	GAS,MAS,QUAD
chr10:67239460-67239861	MAS
chr10:67240077-67240662	GAS,MAS,PLA
chr10:67240942-67243771	GAS,MAS,PLA,QUAD
chr10:67243941-67244782	GAS,MAS,PLA,QUAD
chr10:67244874-67245505	GAS,MAS,QUAD
chr10:67245637-67246033	GAS,MAS,PLA,QUAD
chr10:67246157-67248010	GAS,MAS,PLA,QUAD
chr10:67248151-67249629	GAS,MAS,PLA,QUAD
chr10:67249807-67254451	GAS,MAS,PLA,QUAD
chr10:67254584-67255447	GAS,MAS,PLA,QUAD
chr10:68098670-68101894	GAS,PLA,QUAD
chr10:68102094-68118250	GAS
chr10:68118349-68126698	GAS,PLA
chr10:68126752-68128788	GAS,PLA,QUAD
chr10:69219540-69248770	ATR
chr10:69270750-69270986	ATR
chr10:69270874-69272738	GAS,MAS,PLA,QUAD
chr10:69289056-69289519	GAS,PLA
chr10:69534285-69808415	GAS,MAS,PLA,QUAD
chr10:69808518-69808872	GAS,PLA
chr10:69808972-69809170	GAS,MAS,PLA
chr10:69809270-69815694	MAS,PLA
chr10:69871200-69874789	MAS
chr10:69874889-69877829	GAS,MAS,PLA,QUAD
chr10:69877929-69879892	GAS,MAS,PLA
chr10:69879992-69882360	GAS
chr10:69882559-69884746	GAS,MAS,PLA
chr10:69884846-69892321	ATR
chr10:69898140-69898227	MAS
chr10:69898327-69898993	GAS,QUAD
chr10:69899090-69904197	GAS,MAS,PLA
chr10:69904271-69927694	GAS,MAS,PLA,QUAD
chr10:69926192-69927694	PLA
chr10:69932497-69950951	GAS,MAS,PLA,QUAD
chr10:69951059-69955925	GAS,MAS,PLA,QUAD
chr10:69959073-69973721	GAS,MAS,PLA,QUAD
chr10:69976256-69977712	MAS
chr10:69977810-69978470	GAS,MAS,PLA,QUAD
chr10:69978700-69979317	GAS,MAS,PLA,QUAD
chr10:69979444-69980271	GAS,MAS,PLA,QUAD
chr10:69980395-69982115	GAS,MAS,PLA,QUAD
chr10:69994447-69998094	GAS,MAS,PLA,QUAD
chr10:69998227-69999354	GAS,MAS,PLA,QUAD
chr10:69999499-70001922	GAS,MAS,PLA,QUAD
chr10:69999499-70002510	GAS,MAS,PLA,QUAD
chr10:70002602-70004609	GAS,MAS,PLA,QUAD
chr10:70008865-70013971	EDL,EYE,FDB,GAS,PLA,QUAD,SOL,TAN,TON
chr10:70014056-70014189	DIA,EDL,EYE,FDB,GAS,MAS,PLA,QUAD,SOL,TAN,TON
chr10:70014247-70015567	DIA,EDL,FDB,GAS,MAS,PLA,QUAD,SOL,TAN,TON
chr10:70015654-70023831	GAS,MAS,PLA,QUAD
chr10:70142729-70154707	GAS,MAS,PLA,QUAD
chr10:70154837-70167001	GAS,MAS,PLA,QUAD
chr10:70167106-70169091	GAS,MAS,PLA,QUAD
chr10:70169253-70175010	GAS,MAS,PLA,QUAD
chr10:70182261-70187690	GAS,MAS,PLA
chr10:70204760-70216951	GAS,MAS,PLA,QUAD
chr10:70217067-70219476	GAS,MAS,PLA,QUAD
chr10:70477273-70498885	PLA
chr10:70957715-70958773	PLA
chr10:71228700-71229086	GAS,MAS,PLA,QUAD
chr10:71229144-71233356	GAS,MAS,PLA,QUAD
chr10:71233453-71234864	GAS,MAS,PLA,QUAD
chr10:71235015-71235542	GAS,MAS,PLA,QUAD
chr10:71235614-71236915	GAS,MAS,PLA,QUAD
chr10:71255875-71256614	GAS,MAS,PLA,QUAD
chr10:71256709-71258200	GAS,MAS,PLA,QUAD
chr10:71258307-71259741	GAS,MAS,PLA,QUAD
chr10:71259820-71262083	GAS,MAS,PLA
chr10:71262116-71262198	PLA
chr10:71331127-71336213	GAS,PLA,QUAD
chr10:71372881-71376704	GAS,MAS,PLA
chr10:72656362-72656529	MAS
chr10:72656874-72657045	GAS,MAS,PLA,QUAD
chr10:72657389-72673965	GAS,MAS,PLA,QUAD
chr10:75230872-75241064	MAS,PLA
chr10:75241219-75245078	GAS,MAS,PLA
chr10:75246713-75248436	GAS,MAS,PLA,QUAD
chr10:75248645-75257867	GAS,MAS,PLA,QUAD
chr10:75257942-75258967	GAS,MAS,PLA,QUAD
chr10:75259144-75261793	GAS,MAS,PLA,QUAD
chr10:75261958-75263278	GAS,MAS,PLA,QUAD
chr10:75263371-75267498	GAS,MAS,PLA,QUAD
chr10:75267590-75274016	GAS,MAS,PLA,QUAD
chr10:75274101-75276770	GAS,MAS,PLA,QUAD
chr10:75276928-75279858	GAS,MAS,PLA
chr10:75279962-75307236	GAS,MAS,PLA,QUAD
chr10:75307354-75308033	GAS,MAS,PLA,QUAD
chr10:75308094-75309789	GAS,MAS,PLA,QUAD
chr10:75508970-75509591	GAS,MAS,PLA
chr10:75510124-75511120	GAS,MAS,PLA,QUAD
chr10:75518126-75519313	GAS,MAS,PLA,QUAD
chr10:75519461-75532176	GAS,MAS,PLA,QUAD
chr10:75532370-75535260	GAS,MAS,PLA,QUAD
chr10:75610539-75614729	QUAD
chr10:75653143-75655365	MAS
chr10:75771507-75772737	MAS
chr10:75772914-75773215	MAS,PLA
chr10:75833740-75834174	MAS
chr10:75897089-75897444	GAS,MAS
chr10:75897577-75904383	MAS
chr10:75904575-75906029	MAS,PLA
chr10:75910282-75911518	MAS
chr10:75911657-75915063	PLA
chr10:75915194-75916772	GAS,QUAD
chr10:75936446-75937306	MAS,PLA
chr10:75937455-75937574	GAS,MAS,PLA,QUAD
chr10:7630977-7638008	GAS,MAS,PLA,QUAD
chr10:76351780-76352908	GAS,MAS,PLA,QUAD
chr10:76353037-76354172	MAS,PLA
chr10:76354312-76355058	GAS,MAS,PLA
chr10:76355136-76356163	GAS,MAS,PLA,QUAD
chr10:76356397-76357034	GAS,MAS,PLA,QUAD
chr10:76357155-76367307	PLA
chr10:76367482-76368730	GAS,MAS,PLA,QUAD
chr10:76368834-76369834	GAS,MAS,PLA,QUAD
chr10:76380440-76381232	MAS
chr10:76381426-76382019	GAS,MAS,PLA,QUAD
chr10:76382188-76384740	GAS,MAS,PLA,QUAD
chr10:7638226-7640044	GAS,MAS,PLA,QUAD
chr10:76384906-76385703	GAS,MAS,PLA,QUAD
chr10:76385871-76387426	GAS,MAS,PLA,QUAD
chr10:76389533-76392193	PLA
chr10:76393040-76399855	GAS,MAS,PLA,QUAD
chr10:76400027-76401331	GAS,MAS,PLA,QUAD
chr10:7640131-7640694	GAS,MAS,PLA,QUAD
chr10:76406725-76408697	DIA,SOL,TON
chr10:7640816-7644324	GAS,MAS,PLA,QUAD
chr10:76412650-76416689	GAS,PLA
chr10:7644430-7647589	GAS,MAS,PLA,QUAD
chr10:76466366-76468156	GAS,MAS,QUAD
chr10:7647622-7649050	GAS,MAS,PLA,QUAD
chr10:76483384-76484653	GAS,MAS,PLA
chr10:76488503-76489334	MAS
chr10:7649156-7663074	MAS,PLA
chr10:76493544-76496407	MAS
chr10:76496561-76499455	GAS,PLA
chr10:76501345-76502651	MAS,PLA
chr10:76502806-76504162	MAS,PLA
chr10:76507548-76508297	GAS,MAS,PLA
chr10:76511224-76512417	MAS
chr10:76512569-76515581	GAS,MAS,PLA,QUAD
chr10:76596812-76603328	GAS,MAS,PLA,QUAD
chr10:76603368-76603461	GAS,MAS,PLA,QUAD
chr10:76603915-76604055	GAS,MAS,PLA,QUAD
chr10:76604209-76604344	PLA
chr10:76604391-76604848	GAS,MAS,PLA
chr10:76604885-76605059	PLA
chr10:76608771-76609256	PLA
chr10:76610704-76611028	PLA
chr10:76611074-76611162	MAS,PLA
chr10:76611190-76611415	MAS,PLA
chr10:76611443-76611791	MAS,PLA
chr10:76611837-76611947	MAS,PLA
chr10:76612002-76613254	GAS,PLA
chr10:76613321-76614108	GAS,MAS,PLA,QUAD
chr10:76614130-76614336	GAS,MAS,PLA,QUAD
chr10:76614936-76615045	GAS,MAS,PLA,QUAD
chr10:7668125-7669552	GAS,QUAD
chr10:76710182-76710345	GAS,MAS,PLA,QUAD
chr10:76710376-76710961	GAS,MAS,PLA,QUAD
chr10:76711140-76711282	GAS,MAS,PLA,QUAD
chr10:7671120-7673584	MAS
chr10:76711467-76711574	PLA
chr10:76711685-76712267	GAS,MAS,PLA,QUAD
chr10:76712402-76712864	GAS,MAS,PLA,QUAD
chr10:76712874-76713184	GAS,MAS,PLA,QUAD
chr10:76713222-76713625	GAS,MAS,PLA
chr10:76713662-76713872	GAS,MAS,PLA
chr10:76713939-76714113	GAS,MAS,PLA
chr10:76714450-76714657	MAS,PLA
chr10:76714709-76714994	MAS,PLA
chr10:76716324-76716718	MAS
chr10:76716782-76717128	MAS,PLA
chr10:76717165-76717261	GAS,MAS,PLA
chr10:76717316-76717399	GAS,PLA
chr10:76717463-76717794	GAS,MAS,PLA
chr10:76718113-76718372	MAS,PLA
chr10:76718418-76718516	GAS,MAS,PLA
chr10:76718544-76718978	GAS,MAS,PLA
chr10:76719006-76719124	GAS,MAS,PLA
chr10:76719677-76720960	MAS,PLA
chr10:76721006-76721087	PLA
chr10:76721109-76721262	GAS,MAS,PLA,QUAD
chr10:76721284-76721402	GAS,MAS,PLA,QUAD
chr10:76721532-76721815	GAS,MAS,PLA
chr10:76721976-76723375	PLA
chr10:76723577-76724938	GAS,PLA
chr10:7673721-7675005	GAS,MAS
chr10:7676363-7678567	GAS,MAS
chr10:7691815-7697501	GAS,MAS,PLA,QUAD
chr10:77058828-77059104	AA,AOR,TA
chr10:7706043-7710464	MAS
chr10:77077601-77077683	AOR
chr10:77080865-77081148	PLA
chr10:7710956-7712500	GAS,MAS
chr10:77260825-77262436	GAS,MAS,PLA,QUAD
chr10:77262582-77263264	MAS,PLA
chr10:77263376-77264955	MAS,PLA
chr10:7741566-7743555	GAS,MAS,PLA,QUAD
chr10:7748898-7751543	QUAD
chr10:77503915-77514305	MAS
chr10:7751650-7752743	GAS,QUAD
chr10:77542027-77542397	MAS
chr10:77546194-77547125	MAS
chr10:77550102-77550972	MAS
chr10:77551069-77556087	MAS
chr10:77556178-77557389	MAS
chr10:77557531-77557951	MAS
chr10:77558140-77559478	MAS
chr10:77560373-77561012	MAS
chr10:77561216-77564637	MAS
chr10:77564805-77565177	MAS
chr10:77587304-77589633	MAS,PLA
chr10:77589743-77592845	GAS,MAS,PLA,QUAD
[truncated: 57,676 more rows]
