# Supplementary material for: Transcriptional profiling reveals extraordinary diversity among skeletal muscle tissues
Source: eLife journal article supplement (doi:10.7554/elife.34613), 2018-05-29
Supplement: supp [file elife-34613-supp-v1.zip › elife_poa_e34613_Supplementary_file_8.xlsx]

## Sheet: Sheet1
Coordinates(Chromosome:Start-Stop)	Tissues
chr10:100051960-100064083	RAT_SOL_F
chr10:100064147-100076734	RAT_SOL_F
chr10:100080131-100080856	RAT_EDL_M,RAT_SOL_F
chr10:100080941-100087346	RAT_SOL_F
chr10:100087457-100088152	RAT_EDL_F,RAT_EDL_M
chr10:100088221-100089195	RAT_EDL_F,RAT_EDL_M,RAT_SOL_F
chr10:100578432-100583913	RAT_EDL_F,RAT_EDL_M,RAT_SOL_F
chr10:102638073-102638091	RAT_EDL_F,RAT_EDL_M,RAT_SOL_F,RAT_SOL_M
chr10:105765292-105765963	RAT_EDL_M,RAT_SOL_F
chr10:105766039-105779587	RAT_EDL_M,RAT_SOL_F
chr10:105826592-105829847	RAT_EDL_M
chr10:105845450-105847016	RAT_EDL_F,RAT_EDL_M,RAT_SOL_F
chr10:106937320-106937403	RAT_SOL_F
chr10:106948779-106951973	RAT_EDL_M,RAT_SOL_F
chr10:106963026-106966947	RAT_SOL_F
chr10:107004816-107023653	RAT_SOL_F
chr10:107023750-107023856	RAT_SOL_F
chr10:107023938-107045212	RAT_SOL_F
chr10:107493902-107494185	RAT_EDL_M
chr10:108198964-108214387	RAT_EDL_M,RAT_SOL_F
chr10:108214507-108230436	RAT_EDL_M,RAT_SOL_F
chr10:108230940-108231336	RAT_SOL_F
chr10:108234144-108240104	RAT_EDL_M,RAT_SOL_F
chr10:108240180-108240778	RAT_EDL_F,RAT_EDL_M,RAT_SOL_F
chr10:108240868-108241120	RAT_EDL_F,RAT_SOL_F
chr10:108249651-108250913	RAT_EDL_F,RAT_EDL_M,RAT_SOL_F
chr10:108251009-108251839	RAT_EDL_M,RAT_SOL_F
chr10:108251945-108252756	RAT_EDL_F,RAT_EDL_M,RAT_SOL_F
chr10:108252925-108253324	RAT_EDL_M,RAT_SOL_F
chr10:108259847-108260835	RAT_EDL_M
chr10:108262432-108264702	RAT_EDL_F,RAT_EDL_M,RAT_SOL_F
chr10:108267421-108268571	RAT_SOL_F
chr10:108268708-108269253	RAT_EDL_F,RAT_EDL_M,RAT_SOL_F
chr10:108269359-108271721	RAT_EDL_F,RAT_EDL_M,RAT_SOL_F
chr10:108271770-108274137	RAT_EDL_F,RAT_EDL_M,RAT_SOL_F
chr10:108274189-108277206	RAT_EDL_F,RAT_EDL_M,RAT_SOL_F
chr10:109694090-109696187	RAT_SOL_F
chr10:110937867-110938636	RAT_SOL_F
chr10:110938731-110939210	RAT_EDL_F,RAT_SOL_F
chr10:110944532-110945468	RAT_EDL_F,RAT_EDL_M,RAT_SOL_F
chr10:110945564-110946166	RAT_EDL_F,RAT_EDL_M,RAT_SOL_F
chr10:110946325-110947298	RAT_EDL_M,RAT_SOL_F
chr10:110948285-110949620	RAT_EDL_F,RAT_SOL_F
chr10:110949684-110950560	RAT_EDL_F
chr10:110955167-110956285	RAT_EDL_M
chr10:110968494-110973747	RAT_EDL_F,RAT_EDL_M,RAT_SOL_F
chr10:110974422-110981995	RAT_EDL_F,RAT_EDL_M,RAT_SOL_F
chr10:111282225-111284329	RAT_EDL_F,RAT_SOL_F
chr10:111286253-111287826	RAT_EDL_F,RAT_SOL_F
chr10:111288013-111288692	RAT_EDL_M,RAT_SOL_F
chr10:111291594-111293091	RAT_SOL_F
chr10:111494294-111494794	RAT_EDL_F,RAT_EDL_M,RAT_SOL_F
chr10:111494825-111495050	RAT_SOL_F
chr10:111494825-111495324	RAT_EDL_F,RAT_EDL_M,RAT_SOL_F
chr10:111495376-111496039	RAT_EDL_F,RAT_EDL_M,RAT_SOL_F
chr10:111977399-111979090	RAT_EDL_M,RAT_SOL_F
chr10:111982879-111982963	RAT_EDL_F,RAT_EDL_M,RAT_SOL_F
chr10:111983058-111984538	RAT_EDL_F,RAT_EDL_M,RAT_SOL_F
chr10:11390986-11448641	RAT_EDL_F,RAT_EDL_M,RAT_SOL_F
chr10:115199765-115202503	RAT_EDL_F,RAT_EDL_M,RAT_SOL_F
chr10:115202591-115203117	RAT_EDL_M,RAT_SOL_F
chr10:115203235-115208896	RAT_EDL_M,RAT_SOL_F
chr10:115208995-115209556	RAT_EDL_F,RAT_EDL_M,RAT_SOL_F
chr10:115209657-115210195	RAT_EDL_F,RAT_EDL_M,RAT_SOL_F
chr10:115212808-115217561	RAT_EDL_F,RAT_EDL_M,RAT_SOL_F
chr10:115217657-115218550	RAT_SOL_F
chr10:115218655-115219151	RAT_EDL_F,RAT_EDL_M,RAT_SOL_F
chr10:115219281-115220210	RAT_EDL_M,RAT_SOL_F
chr10:115233259-115239271	RAT_SOL_F
chr10:115239347-115240848	RAT_EDL_F,RAT_EDL_M,RAT_SOL_F
chr10:115294960-115295428	RAT_EDL_F,RAT_EDL_M,RAT_SOL_F
chr10:115295484-115298827	RAT_EDL_F,RAT_EDL_M,RAT_SOL_F
chr10:115298892-115301522	RAT_EDL_F,RAT_EDL_M,RAT_SOL_F
chr10:115302792-115315193	RAT_EDL_F,RAT_SOL_F
chr10:115347784-115359653	RAT_EDL_F,RAT_EDL_M,RAT_SOL_F
chr10:115359768-115361808	RAT_EDL_F,RAT_EDL_M,RAT_SOL_F
chr10:115372947-115376351	RAT_EDL_F,RAT_SOL_F
chr10:115412467-115413961	RAT_EDL_F,RAT_EDL_M,RAT_SOL_F
chr10:115414094-115414195	RAT_EDL_M
chr10:115414318-115415238	RAT_EDL_F,RAT_SOL_F
chr10:115415341-115415619	RAT_EDL_M,RAT_SOL_F
chr10:115415740-115416738	RAT_EDL_F,RAT_EDL_M,RAT_SOL_F
chr10:115418829-115419771	RAT_EDL_M,RAT_SOL_F
chr10:115424653-115427035	RAT_EDL_F,RAT_EDL_M,RAT_SOL_F
chr10:115427147-115427397	RAT_EDL_F,RAT_EDL_M,RAT_SOL_F
chr10:115427503-115427624	RAT_EDL_F,RAT_EDL_M,RAT_SOL_F
chr10:115427791-115428860	RAT_EDL_M,RAT_SOL_F
chr10:115428962-115430652	RAT_EDL_M
chr10:115430755-115431402	RAT_EDL_F,RAT_EDL_M,RAT_SOL_F
chr10:115431443-115431702	RAT_EDL_F,RAT_EDL_M,RAT_SOL_F
chr10:115431766-115431895	RAT_EDL_M
chr10:115817661-115827820	RAT_EDL_F,RAT_EDL_M
chr10:115833323-115835091	RAT_EDL_F,RAT_EDL_M
chr10:116347063-116347926	RAT_SOL_F
chr10:116348209-116349965	RAT_EDL_M
chr10:116354035-116357191	RAT_EDL_F,RAT_EDL_M,RAT_SOL_F
chr10:116357299-116361207	RAT_EDL_F,RAT_EDL_M,RAT_SOL_F
chr10:116362726-116363278	RAT_EDL_F,RAT_EDL_M,RAT_SOL_F
chr10:116363370-116363974	RAT_EDL_M,RAT_SOL_F
chr10:116364052-116367480	RAT_EDL_F,RAT_EDL_M,RAT_SOL_F
chr10:116368816-116369295	RAT_EDL_F,RAT_EDL_M,RAT_SOL_F
chr10:116380953-116383852	RAT_EDL_M,RAT_SOL_F
chr10:116486287-116492291	RAT_EDL_F,RAT_EDL_M,RAT_SOL_F
chr10:116492437-116492570	RAT_SOL_F,RAT_SOL_M
chr10:116492437-116493692	RAT_EDL_F,RAT_EDL_M,RAT_SOL_F
chr10:116493794-116494822	RAT_EDL_F,RAT_EDL_M,RAT_SOL_F
chr10:116494873-116494959	RAT_EDL_F,RAT_EDL_M,RAT_SOL_F
chr10:116495022-116498085	RAT_EDL_F,RAT_EDL_M,RAT_SOL_F
chr10:116498243-116498337	RAT_EDL_F,RAT_EDL_M,RAT_SOL_F
chr10:116498459-116499341	RAT_EDL_F,RAT_EDL_M,RAT_SOL_F
chr10:116499467-116501191	RAT_EDL_F,RAT_EDL_M,RAT_SOL_F
chr10:116501318-116504034	RAT_EDL_F,RAT_EDL_M,RAT_SOL_F
chr10:116504115-116506228	RAT_EDL_F,RAT_EDL_M,RAT_SOL_F
chr10:116506412-116507040	RAT_EDL_M
chr10:116507189-116517316	RAT_EDL_F,RAT_EDL_M,RAT_SOL_F
chr10:116517384-116527826	RAT_EDL_F,RAT_EDL_M,RAT_SOL_F
chr10:116527950-116549032	RAT_EDL_M,RAT_SOL_F
chr10:117051277-117053015	RAT_EDL_F,RAT_EDL_M,RAT_SOL_F
chr10:117055236-117056039	RAT_EDL_F,RAT_EDL_M,RAT_SOL_F
chr10:117056160-117057173	RAT_EDL_F,RAT_EDL_M,RAT_SOL_F
chr10:117057278-117057790	RAT_EDL_F,RAT_EDL_M,RAT_SOL_F
chr10:117057919-117058097	RAT_EDL_F,RAT_EDL_M,RAT_SOL_F
chr10:117058199-117060647	RAT_EDL_F,RAT_EDL_M,RAT_SOL_F
chr10:117060851-117061297	RAT_EDL_F,RAT_EDL_M,RAT_SOL_F
chr10:117061411-117061504	RAT_EDL_F,RAT_EDL_M,RAT_SOL_F
chr10:117062137-117062816	RAT_EDL_F,RAT_EDL_M,RAT_SOL_F
chr10:117215837-117217211	RAT_EDL_F,RAT_EDL_M,RAT_SOL_F
chr10:117217522-117220332	RAT_EDL_F,RAT_EDL_M,RAT_SOL_F
chr10:117220599-117222173	RAT_EDL_F,RAT_EDL_M,RAT_SOL_F
chr10:117280806-117282106	RAT_SOL_F
chr10:117356125-117358992	RAT_EDL_M,RAT_SOL_F
chr10:117356128-117358992	RAT_SOL_F
chr10:117359147-117360439	RAT_EDL_F,RAT_EDL_M,RAT_SOL_F
chr10:117360556-117360855	RAT_SOL_F
chr10:117362188-117362974	RAT_EDL_F,RAT_EDL_M,RAT_SOL_F
chr10:117363121-117366080	RAT_EDL_M,RAT_SOL_F
chr10:117366185-117367778	RAT_EDL_F,RAT_EDL_M,RAT_SOL_F
chr10:117690786-117691144	RAT_EDL_F,RAT_EDL_M
chr10:117691223-117692581	RAT_EDL_F,RAT_EDL_M,RAT_SOL_F
chr10:117701615-117702201	RAT_EDL_F,RAT_EDL_M,RAT_SOL_F
chr10:117702336-117705154	RAT_SOL_F
chr10:117785140-117787792	RAT_SOL_F
chr10:117815781-117817343	RAT_EDL_F,RAT_EDL_M,RAT_SOL_F
chr10:117817461-117818465	RAT_EDL_F,RAT_EDL_M,RAT_SOL_F
chr10:117818610-117820461	RAT_EDL_M
chr10:117821647-117822800	RAT_EDL_F,RAT_EDL_M,RAT_SOL_F
chr10:119203206-119206715	RAT_EDL_F,RAT_EDL_M,RAT_SOL_F
chr10:119206824-119208026	RAT_EDL_M,RAT_SOL_F
chr10:119208192-119208272	RAT_SOL_F
chr10:119212149-119212439	RAT_EDL_M,RAT_SOL_F
chr10:119216249-119216450	RAT_EDL_F,RAT_EDL_M,RAT_SOL_F
chr10:119218065-119219589	RAT_SOL_F
chr10:120165212-120166404	RAT_EDL_M
chr10:120215650-120217503	RAT_EDL_F,RAT_EDL_M,RAT_SOL_F
chr10:120217610-120220750	RAT_EDL_M
chr10:120784239-120791401	RAT_EDL_M,RAT_SOL_F
chr10:120791500-120825107	RAT_EDL_F,RAT_EDL_M,RAT_SOL_F
chr10:120825137-120849975	RAT_EDL_F,RAT_EDL_M,RAT_SOL_F
chr10:120850054-120851983	RAT_EDL_F,RAT_EDL_M,RAT_SOL_F
chr10:120926041-120927945	RAT_EDL_F,RAT_SOL_F
chr10:120928028-120931041	RAT_EDL_M
chr10:120931221-120931720	RAT_EDL_M,RAT_SOL_F
chr10:120933541-120933629	RAT_EDL_M,RAT_SOL_F
chr10:120949364-120952217	RAT_SOL_F
chr10:121376274-121376635	RAT_SOL_F
chr10:121378190-121380117	RAT_EDL_F,RAT_EDL_M,RAT_SOL_F
chr10:121380201-121381172	RAT_EDL_M
chr10:121381292-121383339	RAT_EDL_F,RAT_EDL_M,RAT_SOL_F
chr10:121390732-121391370	RAT_EDL_F,RAT_EDL_M,RAT_SOL_F
chr10:121414468-121416065	RAT_EDL_F,RAT_EDL_M
chr10:121416289-121417084	RAT_EDL_F,RAT_EDL_M,RAT_SOL_F
chr10:121547189-121551250	RAT_EDL_M,RAT_SOL_F
chr10:121551594-121552199	RAT_EDL_F,RAT_EDL_M,RAT_SOL_F
chr10:121552510-121553028	RAT_SOL_F
chr10:121554025-121555986	RAT_SOL_F
chr10:121560300-121561576	RAT_EDL_F,RAT_SOL_F
chr10:121561774-121563925	RAT_SOL_F
chr10:121576404-121578579	RAT_EDL_M,RAT_SOL_F
chr10:121593724-121596183	RAT_SOL_F
chr10:121604585-121605581	RAT_EDL_F,RAT_EDL_M,RAT_SOL_F
chr10:122081690-122088878	RAT_EDL_F,RAT_EDL_M,RAT_SOL_F
chr10:122090775-122094589	RAT_EDL_F,RAT_EDL_M,RAT_SOL_F
chr10:122094693-122095938	RAT_SOL_F
chr10:122904156-122907506	RAT_EDL_M
chr10:123006136-123006971	RAT_EDL_F,RAT_EDL_M,RAT_SOL_F
chr10:123008327-123009502	RAT_EDL_M,RAT_SOL_F
chr10:123016557-123018074	RAT_EDL_M
chr10:123024012-123026079	RAT_SOL_F
chr10:123026171-123026253	RAT_SOL_F
chr10:123036137-123038460	RAT_SOL_F
chr10:123046428-123051636	RAT_EDL_M
chr10:123052313-123059187	RAT_EDL_M
chr10:123113688-123119108	RAT_EDL_F,RAT_EDL_M,RAT_SOL_F
chr10:123119198-123121571	RAT_EDL_F,RAT_EDL_M,RAT_SOL_F
chr10:123121676-123123935	RAT_EDL_F,RAT_EDL_M,RAT_SOL_F
chr10:123124086-123124513	RAT_EDL_F,RAT_EDL_M,RAT_SOL_F
chr10:123124630-123124963	RAT_EDL_F,RAT_EDL_M,RAT_SOL_F
chr10:123125035-123125412	RAT_EDL_F,RAT_EDL_M,RAT_SOL_F
chr10:123125928-123127677	RAT_EDL_F,RAT_EDL_M,RAT_SOL_F
chr10:123127870-123127963	RAT_EDL_F,RAT_EDL_M,RAT_SOL_F
chr10:123128059-123128148	RAT_EDL_F,RAT_EDL_M,RAT_SOL_F
chr10:123128233-123130940	RAT_EDL_F,RAT_EDL_M,RAT_SOL_F
chr10:123131166-123131251	RAT_EDL_F,RAT_EDL_M,RAT_SOL_F
chr10:123131411-123132955	RAT_EDL_F,RAT_EDL_M,RAT_SOL_F
chr10:123133130-123146793	RAT_EDL_F,RAT_EDL_M,RAT_SOL_F
chr10:123146939-123153040	RAT_EDL_M,RAT_SOL_F
chr10:123146939-123163592	RAT_EDL_F,RAT_EDL_M,RAT_SOL_F
chr10:123163655-123168226	RAT_EDL_F,RAT_EDL_M,RAT_SOL_F
chr10:123171227-123175842	RAT_EDL_F,RAT_EDL_M,RAT_SOL_F
chr10:123175974-123181672	RAT_EDL_M,RAT_SOL_F
chr10:12442094-12448006	RAT_EDL_M,RAT_SOL_F
chr10:12448093-12455362	RAT_EDL_M
chr10:12463361-12465180	RAT_EDL_M,RAT_SOL_F
chr10:12465243-12475270	RAT_EDL_F,RAT_EDL_M
chr10:12621381-12633943	RAT_EDL_M
chr10:12666837-12667499	RAT_EDL_F,RAT_SOL_F
chr10:126993909-126995854	RAT_EDL_M,RAT_SOL_F
chr10:127025024-127028364	RAT_EDL_M,RAT_SOL_F
chr10:127065003-127065154	RAT_EDL_M,RAT_SOL_F
chr10:127066004-127066100	RAT_EDL_M,RAT_SOL_F
chr10:127068191-127068268	RAT_EDL_F,RAT_EDL_M,RAT_SOL_F
chr10:127068612-127068907	RAT_EDL_M
chr10:127068989-127069345	RAT_EDL_M
chr10:127096373-127096629	RAT_EDL_F,RAT_EDL_M,RAT_SOL_F
chr10:127096743-127097931	RAT_EDL_M,RAT_SOL_F
chr10:127098638-127098830	RAT_EDL_M,RAT_SOL_F
chr10:127119198-127119402	RAT_EDL_M
chr10:127119480-127119603	RAT_EDL_F,RAT_EDL_M,RAT_SOL_F
chr10:127185173-127185286	RAT_EDL_M,RAT_SOL_F
chr10:127199857-127200183	RAT_EDL_F,RAT_EDL_M,RAT_SOL_F
chr10:127200298-127200839	RAT_EDL_F,RAT_EDL_M,RAT_SOL_F
chr10:127205819-127206613	RAT_EDL_F,RAT_EDL_M,RAT_SOL_F
chr10:127206711-127208869	RAT_EDL_M,RAT_SOL_F
chr10:127267646-127274713	RAT_EDL_F,RAT_EDL_M
chr10:127274811-127274993	RAT_EDL_F,RAT_EDL_M,RAT_SOL_F
chr10:127275056-127275823	RAT_EDL_F,RAT_EDL_M,RAT_SOL_F
chr10:127275923-127276383	RAT_EDL_F,RAT_EDL_M,RAT_SOL_F
chr10:127276850-127277254	RAT_EDL_M
chr10:127277321-127277486	RAT_EDL_M
chr10:127277526-127277694	RAT_EDL_M,RAT_SOL_F
chr10:127277773-127277866	RAT_EDL_F,RAT_EDL_M,RAT_SOL_F
chr10:127277939-127278119	RAT_EDL_F,RAT_EDL_M,RAT_SOL_F
chr10:127278223-127278316	RAT_EDL_F,RAT_EDL_M,RAT_SOL_F
chr10:127278409-127281400	RAT_EDL_F,RAT_EDL_M,RAT_SOL_F
chr10:127290892-127293711	RAT_SOL_F
chr10:127293760-127295320	RAT_EDL_M,RAT_SOL_F
chr10:127295479-127295722	RAT_EDL_F,RAT_EDL_M,RAT_SOL_F
chr10:127296741-127296872	RAT_EDL_M,RAT_SOL_F
chr10:127297653-127297734	RAT_EDL_M,RAT_SOL_F
chr10:127298054-127299247	RAT_EDL_F,RAT_EDL_M,RAT_SOL_F
chr10:127300067-127300177	RAT_EDL_F,RAT_EDL_M,RAT_SOL_F
chr10:127300274-127300409	RAT_EDL_M
chr10:127304387-127305421	RAT_EDL_F,RAT_EDL_M,RAT_SOL_F
chr10:127305626-127305740	RAT_EDL_M,RAT_SOL_F
chr10:127308680-127308907	RAT_EDL_F,RAT_EDL_M,RAT_SOL_F
chr10:127308984-127310003	RAT_EDL_F,RAT_EDL_M,RAT_SOL_F
chr10:127310299-127310443	RAT_EDL_F,RAT_EDL_M,RAT_SOL_F
chr10:127400194-127444275	RAT_EDL_F,RAT_EDL_M,RAT_SOL_F
chr10:127452034-127452691	RAT_EDL_F,RAT_EDL_M,RAT_SOL_F
chr10:127452779-127454629	RAT_EDL_F,RAT_EDL_M,RAT_SOL_F
chr10:127454757-127457649	RAT_EDL_F,RAT_EDL_M,RAT_SOL_F
chr10:127458199-127458809	RAT_EDL_F,RAT_EDL_M,RAT_SOL_F
chr10:127458951-127459466	RAT_EDL_F,RAT_EDL_M,RAT_SOL_F
chr10:127459576-127462187	RAT_EDL_F,RAT_EDL_M,RAT_SOL_F
chr10:127462284-127464981	RAT_EDL_F,RAT_EDL_M,RAT_SOL_F
chr10:127465014-127465130	RAT_EDL_F,RAT_EDL_M,RAT_SOL_F
chr10:127465185-127471767	RAT_EDL_F,RAT_EDL_M,RAT_SOL_F
chr10:127484219-127484505	RAT_EDL_M
chr10:127487876-127492568	RAT_EDL_M
chr10:127497260-127497540	RAT_EDL_M,RAT_SOL_F
chr10:127502850-127503089	RAT_EDL_F,RAT_EDL_M,RAT_SOL_F
chr10:127503355-127503567	RAT_EDL_F,RAT_EDL_M,RAT_SOL_F
chr10:127503666-127503855	RAT_EDL_F,RAT_EDL_M,RAT_SOL_F
chr10:127504956-127507225	RAT_EDL_F,RAT_EDL_M,RAT_SOL_F
chr10:127507293-127507460	RAT_EDL_F,RAT_EDL_M,RAT_SOL_F
chr10:127507514-127507698	RAT_EDL_F,RAT_EDL_M,RAT_SOL_F
chr10:127507785-127507945	RAT_EDL_F,RAT_EDL_M,RAT_SOL_F
chr10:127507998-127508080	RAT_EDL_F,RAT_EDL_M,RAT_SOL_F
chr10:127508219-127508379	RAT_EDL_F,RAT_EDL_M,RAT_SOL_F
chr10:127516326-127516442	RAT_EDL_M
chr10:127539091-127539232	RAT_EDL_F,RAT_EDL_M,RAT_SOL_F
chr10:127539732-127539857	RAT_EDL_M
chr10:127539960-127540152	RAT_SOL_F
chr10:127541375-127541638	RAT_EDL_M,RAT_SOL_F
chr10:127657245-127657555	RAT_EDL_M
chr10:128029285-128029765	RAT_EDL_F,RAT_EDL_M,RAT_SOL_F
chr10:128036561-128039170	RAT_EDL_M
chr10:128042176-128042205	RAT_EDL_F,RAT_EDL_M,RAT_SOL_F,RAT_SOL_M
chr10:128045087-128046167	RAT_EDL_M,RAT_SOL_F
chr10:128084075-128084296	RAT_EDL_F,RAT_EDL_M,RAT_SOL_F
chr10:128085213-128085441	RAT_EDL_F,RAT_EDL_M,RAT_SOL_F
chr10:128085627-128086037	RAT_EDL_F,RAT_EDL_M,RAT_SOL_F
chr10:128086197-128086297	RAT_EDL_F,RAT_EDL_M,RAT_SOL_F
chr10:128086421-128088320	RAT_EDL_F,RAT_EDL_M,RAT_SOL_F
chr10:128088534-128088956	RAT_EDL_F,RAT_EDL_M,RAT_SOL_F
chr10:128089159-128090018	RAT_EDL_F,RAT_EDL_M,RAT_SOL_F
chr10:128113682-128114333	RAT_EDL_M,RAT_SOL_F
chr10:128116408-128116546	RAT_SOL_F
chr10:128121666-128121799	RAT_EDL_M
chr10:128135108-128137473	RAT_EDL_M
chr10:128151356-128176349	RAT_SOL_F
chr10:128314825-128314922	RAT_SOL_F
chr10:128323700-128326063	RAT_EDL_F,RAT_EDL_M,RAT_SOL_F
chr10:128326268-128326576	RAT_EDL_F,RAT_EDL_M,RAT_SOL_F
chr10:128326674-128327017	RAT_EDL_F,RAT_EDL_M,RAT_SOL_F
chr10:128349804-128350432	RAT_EDL_F,RAT_EDL_M,RAT_SOL_F
chr10:128350541-128351198	RAT_EDL_F,RAT_EDL_M,RAT_SOL_F
chr10:128353212-128358333	RAT_EDL_F,RAT_EDL_M,RAT_SOL_F
chr10:128359300-128359433	RAT_EDL_M
chr10:128359536-128359943	RAT_EDL_F,RAT_EDL_M,RAT_SOL_F
chr10:128360154-128360967	RAT_EDL_F,RAT_EDL_M,RAT_SOL_F
chr10:128363792-128364404	RAT_EDL_F,RAT_EDL_M,RAT_SOL_F
chr10:128364507-128365022	RAT_EDL_F,RAT_EDL_M,RAT_SOL_F
chr10:128378167-128378352	RAT_EDL_M
chr10:128382059-128382334	RAT_SOL_F
chr10:128382414-128382631	RAT_EDL_M,RAT_SOL_F
chr10:128383178-128383354	RAT_EDL_M,RAT_SOL_F
chr10:128383873-128386100	RAT_SOL_F
chr10:128386481-128386958	RAT_EDL_M,RAT_SOL_F
chr10:128388989-128389086	RAT_EDL_F,RAT_EDL_M,RAT_SOL_F
chr10:128408607-128408697	RAT_EDL_M
chr10:128461472-128462980	RAT_EDL_M,RAT_SOL_F
chr10:128463067-128463691	RAT_EDL_F,RAT_EDL_M,RAT_SOL_F
chr10:128463774-128463866	RAT_EDL_M,RAT_SOL_F
chr10:128463960-128465156	RAT_EDL_F,RAT_EDL_M,RAT_SOL_F
chr10:128465227-128465436	RAT_EDL_F,RAT_EDL_M,RAT_SOL_F
chr10:128465507-128468794	RAT_EDL_F,RAT_EDL_M,RAT_SOL_F
chr10:128468871-128469005	RAT_EDL_M,RAT_SOL_F
chr10:128469138-128469241	RAT_EDL_M,RAT_SOL_F
chr10:128469358-128469664	RAT_EDL_M,RAT_SOL_F
chr10:128469790-128474200	RAT_EDL_F,RAT_EDL_M,RAT_SOL_F
chr10:128474261-128474371	RAT_EDL_F,RAT_EDL_M,RAT_SOL_F
chr10:128475065-128480349	RAT_EDL_M,RAT_SOL_F
chr10:128480464-128480850	RAT_EDL_M,RAT_SOL_F
chr10:128491034-128491719	RAT_EDL_M,RAT_SOL_F
chr10:128491765-128492058	RAT_EDL_F,RAT_EDL_M,RAT_SOL_F
chr10:128494484-128494589	RAT_EDL_M,RAT_SOL_F
chr10:128494668-128495053	RAT_EDL_M,RAT_SOL_F
chr10:128496397-128496613	RAT_EDL_M,RAT_SOL_F
chr10:128496642-128497200	RAT_EDL_M,RAT_SOL_F
chr10:128510660-128510979	RAT_EDL_M,RAT_SOL_F
chr10:128511030-128511465	RAT_EDL_M,RAT_SOL_F
chr10:128511572-128511654	RAT_EDL_M,RAT_SOL_F
chr10:128511787-128511868	RAT_EDL_M
chr10:128516449-128516532	RAT_EDL_M,RAT_SOL_F
chr10:128516582-128516675	RAT_EDL_M,RAT_SOL_F
chr10:128519214-128519427	RAT_EDL_M,RAT_SOL_F
chr10:128519686-128519788	RAT_EDL_F,RAT_EDL_M,RAT_SOL_F
chr10:128519838-128520272	RAT_EDL_F,RAT_EDL_M,RAT_SOL_F
chr10:128521031-128521613	RAT_EDL_M
chr10:128558972-128559061	RAT_EDL_M,RAT_SOL_F
chr10:128559116-128559229	RAT_EDL_F,RAT_EDL_M,RAT_SOL_F
chr10:128559533-128560081	RAT_EDL_F,RAT_EDL_M,RAT_SOL_F
chr10:128560295-128560658	RAT_EDL_F,RAT_EDL_M,RAT_SOL_F
chr10:128560738-128560918	RAT_EDL_F,RAT_EDL_M,RAT_SOL_F
chr10:128560983-128562826	RAT_EDL_F,RAT_EDL_M,RAT_SOL_F
chr10:128562920-128563065	RAT_EDL_F,RAT_EDL_M,RAT_SOL_F
chr10:128699211-128699471	RAT_EDL_M
chr10:128721073-128721177	RAT_EDL_M
chr10:128722545-128723184	RAT_EDL_F,RAT_EDL_M,RAT_SOL_F
chr10:128733385-128733564	RAT_SOL_F
chr10:128814145-128814565	RAT_EDL_M
chr10:128814686-128816711	RAT_SOL_F
chr10:128912522-128912674	RAT_EDL_F,RAT_EDL_M,RAT_SOL_F
chr10:128920108-128920558	RAT_EDL_F,RAT_EDL_M,RAT_SOL_F
chr10:128941942-128942807	RAT_EDL_M,RAT_SOL_F
chr10:128943879-128944004	RAT_SOL_F
chr10:128944574-128945404	RAT_SOL_F
chr10:128948898-128948982	RAT_EDL_M,RAT_SOL_F
chr10:128949063-128949160	RAT_EDL_M
chr10:128949236-128949373	RAT_EDL_M,RAT_SOL_F
chr10:128950140-128950303	RAT_EDL_M,RAT_SOL_F
chr10:128953859-128953945	RAT_SOL_F
chr10:13179708-13179994	RAT_EDL_F,RAT_EDL_M,RAT_SOL_F
chr10:13181018-13182278	RAT_EDL_F,RAT_EDL_M,RAT_SOL_F
chr10:13182997-13185423	RAT_SOL_F
chr10:13261925-13266972	RAT_SOL_F
chr10:13267054-13291794	RAT_EDL_F,RAT_EDL_M,RAT_SOL_F
chr10:13527838-13531257	RAT_EDL_F,RAT_EDL_M,RAT_SOL_F
chr10:13535610-13535708	RAT_EDL_M,RAT_SOL_F
chr10:13537475-13542623	RAT_EDL_F,RAT_EDL_M,RAT_SOL_F
chr10:13542706-13546349	RAT_EDL_F,RAT_EDL_M,RAT_SOL_F
chr10:13546482-13552825	RAT_EDL_M,RAT_SOL_F
chr10:13653750-13690523	RAT_SOL_F
chr10:13690640-13801847	RAT_SOL_F
chr10:13801950-13829242	RAT_SOL_F
chr10:14066685-14126451	RAT_EDL_F,RAT_EDL_M,RAT_SOL_F
chr10:14133895-14139384	RAT_EDL_F,RAT_EDL_M,RAT_SOL_F
chr10:14139561-14142240	RAT_EDL_F,RAT_EDL_M,RAT_SOL_F
chr10:14142343-14143058	RAT_EDL_F,RAT_EDL_M,RAT_SOL_F
chr10:14661153-14667931	RAT_EDL_M
chr10:14668109-14675933	RAT_EDL_M,RAT_SOL_F
chr10:14676043-14684063	RAT_EDL_F,RAT_EDL_M,RAT_SOL_F
chr10:14684140-14684880	RAT_EDL_F,RAT_EDL_M,RAT_SOL_F
chr10:14685009-14687613	RAT_EDL_F,RAT_EDL_M,RAT_SOL_F
chr10:14925367-14925390	RAT_SOL_F
chr10:17799534-17806764	RAT_EDL_M,RAT_SOL_F
chr10:17806857-17815228	RAT_EDL_F,RAT_EDL_M,RAT_SOL_F
chr10:17815400-17827791	RAT_EDL_F,RAT_EDL_M,RAT_SOL_F
chr10:17827987-17830235	RAT_EDL_F,RAT_EDL_M,RAT_SOL_F
chr10:17830356-17833277	RAT_EDL_F,RAT_EDL_M,RAT_SOL_F
chr10:17833353-17838907	RAT_EDL_F,RAT_EDL_M,RAT_SOL_F
chr10:17839001-17841425	RAT_EDL_F,RAT_EDL_M,RAT_SOL_F
chr10:17841522-17842697	RAT_EDL_F,RAT_EDL_M,RAT_SOL_F
chr10:17908189-17914991	RAT_SOL_F
chr10:18123705-18124879	RAT_EDL_F,RAT_SOL_F
chr10:18225061-18230418	RAT_EDL_M
chr10:19607382-19609136	RAT_EDL_F,RAT_EDL_M,RAT_SOL_F
chr10:19869394-19884777	RAT_SOL_F
chr10:19887174-19888655	RAT_EDL_M
chr10:19888763-19894249	RAT_EDL_F,RAT_SOL_F
chr10:20318112-20322002	RAT_EDL_F,RAT_EDL_M,RAT_SOL_F
chr10:20323869-20325139	RAT_EDL_F,RAT_EDL_M,RAT_SOL_F
chr10:20326100-20328101	RAT_EDL_F,RAT_EDL_M,RAT_SOL_F
chr10:20328208-20329309	RAT_EDL_F,RAT_EDL_M,RAT_SOL_F
chr10:20329395-20332085	RAT_EDL_F,RAT_EDL_M,RAT_SOL_F
chr10:20332262-20333391	RAT_EDL_F,RAT_EDL_M,RAT_SOL_F
chr10:20333573-20334498	RAT_EDL_F,RAT_EDL_M,RAT_SOL_F
chr10:20334646-20339708	RAT_EDL_F,RAT_EDL_M,RAT_SOL_F
chr10:20339922-20340051	RAT_EDL_F,RAT_EDL_M,RAT_SOL_F
chr10:20400633-20407127	RAT_SOL_F
chr10:20407209-20410342	RAT_SOL_F
chr10:20413141-20418731	RAT_EDL_M,RAT_SOL_F
chr10:20438821-20440764	RAT_SOL_F
chr10:20443370-20479674	RAT_SOL_F
chr10:20479759-20619129	RAT_SOL_F
chr10:20619191-20724675	RAT_SOL_F
chr10:21307780-21336966	RAT_EDL_F,RAT_EDL_M,RAT_SOL_F
chr10:21337076-21341713	RAT_EDL_F,RAT_EDL_M,RAT_SOL_F
chr10:21341980-21342398	RAT_EDL_M,RAT_SOL_F
chr10:21342565-21345076	RAT_EDL_F,RAT_EDL_M,RAT_SOL_F
chr10:21345195-21347261	RAT_EDL_M,RAT_SOL_F
chr10:21347409-21349311	RAT_EDL_F,RAT_EDL_M,RAT_SOL_F
chr10:21349387-21351926	RAT_EDL_F,RAT_EDL_M,RAT_SOL_F
chr10:21352045-21352541	RAT_EDL_F,RAT_EDL_M,RAT_SOL_F
chr10:21352611-21354638	RAT_EDL_F,RAT_EDL_M,RAT_SOL_F
chr10:21354744-21358312	RAT_EDL_F,RAT_EDL_M,RAT_SOL_F
chr10:21358404-21358731	RAT_EDL_F,RAT_EDL_M,RAT_SOL_F
chr10:21358841-21364674	RAT_EDL_F,RAT_EDL_M,RAT_SOL_F
chr10:21364776-21367641	RAT_EDL_F,RAT_EDL_M,RAT_SOL_F
chr10:21980131-21980423	RAT_SOL_F,RAT_SOL_M
chr10:21994826-21994965	RAT_EDL_M,RAT_SOL_F
chr10:21995899-21996025	RAT_EDL_M,RAT_SOL_F
chr10:21996110-21996222	RAT_EDL_F,RAT_EDL_M,RAT_SOL_F
chr10:21996672-21996978	RAT_EDL_M,RAT_SOL_F
chr10:22707684-22707770	RAT_EDL_F,RAT_EDL_M,RAT_SOL_F
chr10:22709210-22709356	RAT_EDL_F,RAT_EDL_M,RAT_SOL_F
chr10:22709440-22711913	RAT_EDL_F,RAT_EDL_M,RAT_SOL_F
chr10:23106289-23109831	RAT_EDL_F,RAT_SOL_F
chr10:23109933-23111559	RAT_EDL_F,RAT_EDL_M
chr10:23140098-23151931	RAT_EDL_F,RAT_EDL_M,RAT_SOL_F
chr10:23803854-23804187	RAT_EDL_M
chr10:24155385-24177165	RAT_EDL_M
chr10:24177236-24179116	RAT_SOL_F
chr10:24180916-24181517	RAT_EDL_F,RAT_EDL_M,RAT_SOL_F
chr10:24181615-24182768	RAT_EDL_F,RAT_EDL_M,RAT_SOL_F
chr10:24182842-24184986	RAT_EDL_F,RAT_EDL_M,RAT_SOL_F
chr10:24185070-24187627	RAT_EDL_M,RAT_SOL_F
chr10:24596944-24597314	RAT_EDL_F,RAT_EDL_M,RAT_SOL_F
chr10:24654976-24655802	RAT_EDL_M,RAT_SOL_F
chr10:24669800-24669942	RAT_EDL_M
chr10:24798281-24799157	RAT_EDL_M,RAT_SOL_F
chr10:24808198-24809853	RAT_EDL_M,RAT_SOL_F
chr10:24873598-24874569	RAT_EDL_M,RAT_SOL_F
chr10:24902474-24903660	RAT_SOL_F
chr10:25220759-25239625	RAT_EDL_F,RAT_EDL_M,RAT_SOL_F
chr10:25479162-25479667	RAT_EDL_M
chr10:25504260-25506174	RAT_EDL_M
chr10:26846129-26849874	RAT_EDL_F,RAT_EDL_M,RAT_SOL_F
chr10:26850111-26854873	RAT_SOL_F
chr10:26872765-26877156	RAT_EDL_M,RAT_SOL_F
chr10:26877235-26878890	RAT_EDL_M,RAT_SOL_F
chr10:26880771-26887780	RAT_EDL_F,RAT_EDL_M,RAT_SOL_F
chr10:26912732-26916392	RAT_EDL_F,RAT_EDL_M,RAT_SOL_F
chr10:26916455-26917004	RAT_EDL_F,RAT_EDL_M,RAT_SOL_F
chr10:26989470-26990805	RAT_EDL_M,RAT_SOL_F
chr10:26990962-26992912	RAT_EDL_M,RAT_SOL_F
chr10:27000886-27001125	RAT_EDL_F,RAT_EDL_M,RAT_SOL_F
chr10:27006829-27015378	RAT_EDL_F,RAT_EDL_M,RAT_SOL_F
chr10:27015556-27018406	RAT_EDL_F,RAT_EDL_M,RAT_SOL_F
chr10:27018528-27021460	RAT_EDL_F,RAT_EDL_M,RAT_SOL_F
chr10:27021473-27023271	RAT_EDL_F,RAT_EDL_M,RAT_SOL_F
chr10:27030315-27031020	RAT_EDL_F,RAT_EDL_M,RAT_SOL_F
chr10:27041233-27043538	RAT_EDL_M,RAT_SOL_F
chr10:27044579-27050197	RAT_EDL_F,RAT_EDL_M,RAT_SOL_F
chr10:27053034-27054502	RAT_SOL_F
chr10:27104268-27105106	RAT_SOL_F
chr10:27105224-27118478	RAT_SOL_F
chr10:27118690-27119907	RAT_EDL_F,RAT_EDL_M,RAT_SOL_F
chr10:27184502-27187745	RAT_EDL_F,RAT_EDL_M,RAT_SOL_F
chr10:27187880-27187967	RAT_SOL_F
chr10:27188157-27188260	RAT_EDL_M,RAT_SOL_F
chr10:27224070-27231574	RAT_EDL_F,RAT_EDL_M,RAT_SOL_F
chr10:27366152-27368976	RAT_SOL_F
chr10:28570192-28573367	RAT_SOL_F
chr10:28573405-28574818	RAT_EDL_F,RAT_SOL_F
chr10:28574917-28575589	RAT_EDL_M,RAT_SOL_F
chr10:28586073-28586907	RAT_EDL_M,RAT_SOL_F
chr10:28587082-28588927	RAT_EDL_M
chr10:29222131-29222220	RAT_EDL_F,RAT_EDL_M,RAT_SOL_F
chr10:29225415-29227206	RAT_EDL_F,RAT_EDL_M
chr10:29317723-29322274	RAT_EDL_F,RAT_EDL_M,RAT_SOL_F
chr10:29331872-29334190	RAT_EDL_F,RAT_EDL_M,RAT_SOL_F
chr10:29334272-29344340	RAT_EDL_F,RAT_EDL_M,RAT_SOL_F
chr10:29454330-29499931	RAT_SOL_F
chr10:29500130-29504580	RAT_EDL_M,RAT_SOL_F
chr10:29504728-29506387	RAT_EDL_M,RAT_SOL_F
chr10:31314637-31316292	RAT_SOL_F
chr10:31320337-31326021	RAT_EDL_M,RAT_SOL_F
chr10:31326161-31327880	RAT_SOL_F
chr10:31346713-31357871	RAT_SOL_F
chr10:31502732-31503750	RAT_EDL_F,RAT_EDL_M,RAT_SOL_F
chr10:31503823-31505772	RAT_EDL_F,RAT_EDL_M,RAT_SOL_F
chr10:31505975-31517383	RAT_EDL_F,RAT_EDL_M,RAT_SOL_F
chr10:31517549-31534662	RAT_EDL_F,RAT_EDL_M,RAT_SOL_F
chr10:33083746-33139073	RAT_EDL_F,RAT_EDL_M,RAT_SOL_F
chr10:33139284-33157012	RAT_EDL_F,RAT_EDL_M,RAT_SOL_F
chr10:33157175-33158245	RAT_EDL_F,RAT_EDL_M,RAT_SOL_F
chr10:33158279-33175768	RAT_EDL_F,RAT_EDL_M,RAT_SOL_F
chr10:33175829-33183953	RAT_EDL_F,RAT_EDL_M,RAT_SOL_F
chr10:33184017-33186640	RAT_EDL_F,RAT_EDL_M,RAT_SOL_F
chr10:33196126-33200162	RAT_EDL_F,RAT_EDL_M,RAT_SOL_F
chr10:33200223-33233854	RAT_EDL_F,RAT_EDL_M,RAT_SOL_F
chr10:33257138-33258086	RAT_EDL_F,RAT_EDL_M,RAT_SOL_F
chr10:33332466-33333231	RAT_EDL_F,RAT_EDL_M,RAT_SOL_F
chr10:33333250-33334981	RAT_EDL_F,RAT_EDL_M,RAT_SOL_F
chr10:33335015-33335139	RAT_EDL_F,RAT_EDL_M,RAT_SOL_F
chr10:33335167-33337512	RAT_EDL_F,RAT_EDL_M,RAT_SOL_F
chr10:33337540-33343075	RAT_EDL_M,RAT_SOL_F
chr10:33343124-33363977	RAT_EDL_F,RAT_EDL_M,RAT_SOL_F
chr10:33437748-33438791	RAT_EDL_F,RAT_EDL_M,RAT_SOL_F
chr10:33438819-33439174	RAT_EDL_F,RAT_EDL_M,RAT_SOL_F
chr10:33444751-33445419	RAT_EDL_F,RAT_EDL_M,RAT_SOL_F
chr10:33451003-33464557	RAT_EDL_F,RAT_EDL_M,RAT_SOL_F
chr10:33464597-33466422	RAT_EDL_F,RAT_EDL_M,RAT_SOL_F
chr10:33466462-33468155	RAT_EDL_F,RAT_EDL_M,RAT_SOL_F
chr10:33468195-33471565	RAT_EDL_F,RAT_EDL_M,RAT_SOL_F
chr10:33927622-33928011	RAT_EDL_M,RAT_SOL_F
chr10:33928164-33929820	RAT_SOL_F
chr10:33930345-33935088	RAT_EDL_F,RAT_EDL_M,RAT_SOL_F
chr10:33940280-33943649	RAT_EDL_F,RAT_EDL_M,RAT_SOL_F
chr10:33943761-33948928	RAT_SOL_F
chr10:34002568-34008992	RAT_EDL_F,RAT_EDL_M,RAT_SOL_F
chr10:34012138-34019365	RAT_EDL_M
chr10:34407607-34411367	RAT_SOL_F
chr10:34607972-34608359	RAT_SOL_F
chr10:36985240-36986306	RAT_EDL_F,RAT_EDL_M,RAT_SOL_F
chr10:36991899-36993607	RAT_EDL_F,RAT_EDL_M,RAT_SOL_F
chr10:36993701-36993775	RAT_EDL_F,RAT_EDL_M,RAT_SOL_F
chr10:36997130-36997393	RAT_EDL_F,RAT_EDL_M,RAT_SOL_F
chr10:36997503-36997966	RAT_EDL_F,RAT_EDL_M,RAT_SOL_F
chr10:36998570-37000368	RAT_EDL_F,RAT_EDL_M,RAT_SOL_F
chr10:37000427-37001528	RAT_EDL_F,RAT_EDL_M,RAT_SOL_F
chr10:39017402-39026534	RAT_EDL_M,RAT_SOL_F
chr10:39053858-39056776	RAT_EDL_M,RAT_SOL_F
chr10:39080625-39082727	RAT_EDL_M,RAT_SOL_F
chr10:39082867-39083268	RAT_EDL_F,RAT_EDL_M,RAT_SOL_F
chr10:39088452-39088758	RAT_EDL_F,RAT_EDL_M,RAT_SOL_F
chr10:39088907-39092129	RAT_EDL_F,RAT_EDL_M,RAT_SOL_F
chr10:39092318-39094894	RAT_EDL_M,RAT_SOL_F
chr10:39095085-39097082	RAT_EDL_F,RAT_EDL_M,RAT_SOL_F
chr10:39105231-39105961	RAT_EDL_F,RAT_EDL_M,RAT_SOL_F
chr10:39522853-39525400	RAT_SOL_F
chr10:39533711-39533808	RAT_EDL_M
chr10:39533963-39551386	RAT_EDL_M
chr10:39790844-39794863	RAT_SOL_F
chr10:39828606-39830898	RAT_EDL_F,RAT_EDL_M,RAT_SOL_F
chr10:39832644-39835159	RAT_EDL_M,RAT_SOL_F
chr10:39835353-39836625	RAT_EDL_M
chr10:39838558-39840884	RAT_SOL_F
chr10:39841004-39843410	RAT_EDL_M,RAT_SOL_F
chr10:39843530-39846141	RAT_EDL_F,RAT_EDL_M,RAT_SOL_F
chr10:39846284-39846668	RAT_EDL_F,RAT_EDL_M,RAT_SOL_F
chr10:39846914-39847974	RAT_EDL_F,RAT_EDL_M,RAT_SOL_F
chr10:39848084-39851866	RAT_EDL_F,RAT_EDL_M,RAT_SOL_F
chr10:39854809-39859106	RAT_EDL_M
chr10:39859222-39862693	RAT_EDL_F,RAT_EDL_M,RAT_SOL_F
chr10:39863929-39864593	RAT_EDL_M
chr10:39864841-39867292	RAT_EDL_F,RAT_EDL_M,RAT_SOL_F
chr10:40227662-40233107	RAT_EDL_F,RAT_EDL_M,RAT_SOL_F
chr10:40233208-40234821	RAT_EDL_M,RAT_SOL_F
chr10:40234899-40236122	RAT_EDL_M
chr10:40239788-40243855	RAT_EDL_F,RAT_EDL_M,RAT_SOL_F
chr10:40254465-40257212	RAT_EDL_F,RAT_EDL_M,RAT_SOL_F
chr10:40434415-40436071	RAT_EDL_M,RAT_SOL_F
chr10:40469723-40469885	RAT_EDL_F,RAT_EDL_M,RAT_SOL_F
chr10:40469956-40475568	RAT_EDL_F,RAT_EDL_M,RAT_SOL_F
chr10:40475642-40476156	RAT_EDL_F,RAT_EDL_M,RAT_SOL_F
chr10:40476968-40477701	RAT_EDL_M
chr10:40833357-40834175	RAT_EDL_F,RAT_EDL_M,RAT_SOL_F
chr10:40836365-40841353	RAT_EDL_F,RAT_SOL_F
chr10:40841816-40843041	RAT_SOL_F
chr10:40843144-40844960	RAT_SOL_F
chr10:40845007-40847129	RAT_EDL_M,RAT_SOL_F
chr10:40849842-40850929	RAT_EDL_M,RAT_SOL_F
chr10:40851070-40852496	RAT_EDL_M,RAT_SOL_F
chr10:41524146-41526826	RAT_EDL_F,RAT_EDL_M,RAT_SOL_F
chr10:41526884-41528671	RAT_EDL_F,RAT_EDL_M,RAT_SOL_F
chr10:41811301-41894041	RAT_EDL_F,RAT_EDL_M,RAT_SOL_F
chr10:41905365-41906335	RAT_EDL_F,RAT_EDL_M,RAT_SOL_F
chr10:41906481-41907271	RAT_EDL_F,RAT_EDL_M,RAT_SOL_F
chr10:42339926-42340181	RAT_EDL_F,RAT_EDL_M,RAT_SOL_F
chr10:42360248-42400340	RAT_EDL_F,RAT_EDL_M,RAT_SOL_F
chr10:42400400-42415548	RAT_EDL_F,RAT_EDL_M,RAT_SOL_F
chr10:42426588-42438353	RAT_EDL_M,RAT_SOL_F
chr10:42438406-42454306	RAT_EDL_F,RAT_EDL_M,RAT_SOL_F
chr10:42526050-42533148	RAT_EDL_F,RAT_EDL_M,RAT_SOL_F
chr10:42533274-42534652	RAT_EDL_F,RAT_EDL_M,RAT_SOL_F
chr10:42698274-42700482	RAT_EDL_M
chr10:42783542-42789299	RAT_EDL_F,RAT_EDL_M,RAT_SOL_F
chr10:42789415-42791178	RAT_EDL_F,RAT_EDL_M,RAT_SOL_F
chr10:42791292-42794774	RAT_EDL_F,RAT_EDL_M,RAT_SOL_F
chr10:42794837-42796205	RAT_EDL_F,RAT_EDL_M,RAT_SOL_F
chr10:42797734-42798746	RAT_EDL_F,RAT_EDL_M,RAT_SOL_F
chr10:42798856-42801632	RAT_EDL_F,RAT_EDL_M,RAT_SOL_F
chr10:42801728-42801821	RAT_EDL_F,RAT_EDL_M,RAT_SOL_F
chr10:42801955-42803889	RAT_EDL_F,RAT_EDL_M,RAT_SOL_F
chr10:42803983-42805075	RAT_EDL_M,RAT_SOL_F
chr10:42806672-42810842	RAT_EDL_F,RAT_EDL_M,RAT_SOL_F
chr10:42812839-42815054	RAT_EDL_M
chr10:42816470-42823880	RAT_EDL_F,RAT_EDL_M,RAT_SOL_F
chr10:43022919-43074592	RAT_EDL_F,RAT_EDL_M,RAT_SOL_F
chr10:43074689-43127778	RAT_EDL_F,RAT_EDL_M,RAT_SOL_F
chr10:43127931-43157907	RAT_EDL_M,RAT_SOL_F
chr10:43158094-43160705	RAT_EDL_F,RAT_EDL_M,RAT_SOL_F
chr10:43160845-43173975	RAT_EDL_F,RAT_EDL_M,RAT_SOL_F
chr10:43395693-43413514	RAT_EDL_M,RAT_SOL_F
chr10:43413548-43439798	RAT_SOL_F
chr10:43876678-43881472	RAT_EDL_F,RAT_EDL_M,RAT_SOL_F
chr10:43895533-43896008	RAT_SOL_F
chr10:43902537-43907758	RAT_EDL_M,RAT_SOL_F
chr10:44289991-44294595	RAT_EDL_M,RAT_SOL_F
chr10:44294675-44303566	RAT_EDL_F,RAT_EDL_M,RAT_SOL_F
chr10:44303730-44319459	RAT_EDL_F,RAT_EDL_M,RAT_SOL_F
chr10:44347075-44362915	RAT_EDL_M
chr10:4434934-4439491	RAT_SOL_F
chr10:45091127-45092661	RAT_EDL_F,RAT_EDL_M,RAT_SOL_F
chr10:45107878-45115062	RAT_EDL_M,RAT_SOL_F
chr10:45148122-45150435	RAT_EDL_F,RAT_EDL_M,RAT_SOL_F
chr10:45315280-45316430	RAT_EDL_F,RAT_EDL_M,RAT_SOL_F
chr10:45316540-45317698	RAT_EDL_F,RAT_EDL_M,RAT_SOL_F
chr10:45339457-45343033	RAT_EDL_M
chr10:45343159-45346126	RAT_EDL_F,RAT_EDL_M,RAT_SOL_F
chr10:45346315-45347784	RAT_EDL_F,RAT_EDL_M,RAT_SOL_F
chr10:45347894-45353749	RAT_EDL_F,RAT_EDL_M
chr10:45686734-45700576	RAT_SOL_F
chr10:45700676-45700953	RAT_EDL_M,RAT_SOL_F
chr10:45709995-45711433	RAT_EDL_M,RAT_SOL_F
chr10:5022248-5030375	RAT_EDL_M
chr10:5030435-5031765	RAT_EDL_F,RAT_EDL_M,RAT_SOL_F
chr10:5031859-5032916	RAT_EDL_F,RAT_EDL_M,RAT_SOL_F
chr10:5043754-5045265	RAT_EDL_F,RAT_EDL_M,RAT_SOL_F
chr10:5045335-5047530	RAT_EDL_M
chr10:5048916-5052274	RAT_EDL_F,RAT_EDL_M,RAT_SOL_F
chr10:5057968-5061388	RAT_EDL_M,RAT_SOL_F
chr10:50711045-50713175	RAT_SOL_F
chr10:50713263-50714265	RAT_SOL_F
chr10:5072204-5075788	RAT_EDL_F,RAT_EDL_M,RAT_SOL_F
chr10:50750586-50753996	RAT_SOL_F
chr10:50754123-50767090	RAT_EDL_M,RAT_SOL_F
chr10:50849647-50850460	RAT_EDL_M,RAT_SOL_F
chr10:5097680-5099359	RAT_EDL_M,RAT_SOL_F
chr10:5102425-5103635	RAT_EDL_M,RAT_SOL_F
chr10:5103784-5104813	RAT_EDL_F,RAT_EDL_M,RAT_SOL_F
chr10:5117123-5122980	RAT_EDL_F,RAT_EDL_M,RAT_SOL_F
chr10:5123832-5124813	RAT_EDL_M,RAT_SOL_F
chr10:5126843-5127193	RAT_EDL_M,RAT_SOL_F
chr10:5127327-5128379	RAT_EDL_F,RAT_EDL_M,RAT_SOL_F
chr10:5128577-5130009	RAT_EDL_M,RAT_SOL_F
chr10:5153309-5153862	RAT_EDL_F,RAT_EDL_M,RAT_SOL_F
chr10:52022804-52025056	RAT_EDL_F,RAT_EDL_M,RAT_SOL_F
chr10:52025364-52027430	RAT_EDL_F,RAT_EDL_M,RAT_SOL_F
chr10:52025364-52027433	RAT_SOL_F
chr10:52123420-52124057	RAT_SOL_F
chr10:52129100-52129562	RAT_SOL_F
chr10:52142332-52143246	RAT_EDL_M,RAT_SOL_F
chr10:52261940-52284102	RAT_EDL_M
chr10:52290924-52304586	RAT_EDL_M
chr10:52354748-52357341	RAT_EDL_M,RAT_SOL_F
chr10:52429319-52430066	RAT_EDL_F,RAT_EDL_M,RAT_SOL_F
chr10:53278245-53281348	RAT_SOL_F
chr10:53281581-53283836	RAT_EDL_F,RAT_SOL_F
chr10:53283945-53291763	RAT_SOL_F
chr10:53291815-53292257	RAT_EDL_M,RAT_SOL_F
chr10:53292376-53296213	RAT_SOL_F
chr10:53298206-53301501	RAT_EDL_M,RAT_SOL_F
chr10:53301682-53312507	RAT_SOL_F
chr10:53312626-53319597	RAT_SOL_F
chr10:53319720-53348471	RAT_SOL_F
chr10:53597299-53602347	RAT_EDL_F,RAT_EDL_M,RAT_SOL_F
chr10:53606286-53607664	RAT_EDL_F,RAT_EDL_M,RAT_SOL_F
chr10:53925546-53933491	RAT_SOL_F
chr10:53935013-53977022	RAT_EDL_M,RAT_SOL_F
chr10:53977118-54014414	RAT_EDL_M,RAT_SOL_F
chr10:57391446-57391464	RAT_EDL_M
chr10:57496007-57496154	RAT_SOL_F
chr10:57496283-57497496	RAT_EDL_F,RAT_EDL_M,RAT_SOL_F
chr10:57497622-57499415	RAT_EDL_F,RAT_EDL_M,RAT_SOL_F
chr10:57501432-57502622	RAT_EDL_F,RAT_EDL_M,RAT_SOL_F
chr10:57502711-57504581	RAT_EDL_F,RAT_EDL_M,RAT_SOL_F
chr10:57504731-57505145	RAT_SOL_F
chr10:57505383-57506196	RAT_EDL_F,RAT_EDL_M,RAT_SOL_F
chr10:57506303-57509060	RAT_EDL_M,RAT_SOL_F
chr10:57506303-57511443	RAT_EDL_F,RAT_EDL_M,RAT_SOL_F
chr10:57511529-57511902	RAT_EDL_F,RAT_EDL_M,RAT_SOL_F
chr10:57517293-57519362	RAT_EDL_F,RAT_EDL_M,RAT_SOL_F
chr10:57519594-57519697	RAT_EDL_F,RAT_EDL_M,RAT_SOL_F
chr10:57519843-57522955	RAT_EDL_F,RAT_EDL_M,RAT_SOL_F
chr10:57523217-57523960	RAT_EDL_F,RAT_EDL_M,RAT_SOL_F
chr10:57524099-57524319	RAT_EDL_F,RAT_EDL_M,RAT_SOL_F
chr10:57524400-57525324	RAT_EDL_F,RAT_EDL_M,RAT_SOL_F
chr10:57525495-57527664	RAT_EDL_F,RAT_EDL_M,RAT_SOL_F
chr10:57801125-57802419	RAT_EDL_F,RAT_EDL_M,RAT_SOL_F
chr10:57802565-57805566	RAT_EDL_F,RAT_EDL_M,RAT_SOL_F
chr10:57805664-57807354	RAT_EDL_F,RAT_EDL_M,RAT_SOL_F
chr10:57808058-57809045	RAT_EDL_F,RAT_EDL_M,RAT_SOL_F
chr10:57809171-57811212	RAT_EDL_F,RAT_EDL_M,RAT_SOL_F
chr10:5813407-5814040	RAT_EDL_F,RAT_EDL_M,RAT_SOL_F
chr10:5814178-5815551	RAT_EDL_M,RAT_SOL_F
chr10:58268072-58269261	RAT_SOL_F
chr10:58272406-58274735	RAT_EDL_F
chr10:58278952-58280591	RAT_EDL_F,RAT_SOL_F
chr10:58280697-58281356	RAT_EDL_F,RAT_EDL_M,RAT_SOL_F
chr10:58286044-58286132	RAT_EDL_M
chr10:58296240-58298663	RAT_EDL_M
chr10:58394601-58399020	RAT_SOL_F
chr10:58399181-58408069	RAT_SOL_F
chr10:58408137-58409559	RAT_EDL_F,RAT_EDL_M,RAT_SOL_F
chr10:58409681-58410052	RAT_SOL_F
chr10:58410203-58412402	RAT_EDL_F,RAT_EDL_M,RAT_SOL_F
chr10:58414066-58416633	RAT_EDL_F,RAT_EDL_M,RAT_SOL_F
chr10:58416683-58418398	RAT_EDL_F,RAT_EDL_M,RAT_SOL_F
chr10:58418475-58418646	RAT_EDL_M,RAT_SOL_F
chr10:58418475-58421453	RAT_SOL_F
chr10:58467295-58467389	RAT_SOL_F
chr10:58483200-58483896	RAT_EDL_F,RAT_EDL_M,RAT_SOL_F
chr10:58483984-58484441	RAT_EDL_F,RAT_EDL_M,RAT_SOL_F
chr10:58485882-58488572	RAT_EDL_F,RAT_EDL_M,RAT_SOL_F
chr10:58488675-58490609	RAT_EDL_F,RAT_EDL_M,RAT_SOL_F
chr10:58490756-58492410	RAT_EDL_F,RAT_EDL_M,RAT_SOL_F
chr10:58492685-58492801	RAT_EDL_F,RAT_EDL_M,RAT_SOL_F
chr10:58493137-58493662	RAT_EDL_F,RAT_EDL_M,RAT_SOL_F
chr10:59164945-59166503	RAT_SOL_F
chr10:59177017-59178760	RAT_SOL_F
chr10:59181182-59183524	RAT_SOL_F
chr10:59339393-59342683	RAT_EDL_F,RAT_EDL_M,RAT_SOL_F
chr10:59350601-59352082	RAT_EDL_F,RAT_EDL_M,RAT_SOL_F
chr10:59352260-59354339	RAT_EDL_M
chr10:59354411-59361860	RAT_EDL_F,RAT_EDL_M,RAT_SOL_F
chr10:59355421-59361860	RAT_EDL_M,RAT_SOL_F
chr10:59365343-59367288	RAT_EDL_F,RAT_EDL_M,RAT_SOL_F
chr10:59367355-59369240	RAT_EDL_F,RAT_EDL_M,RAT_SOL_F
chr10:59369310-59369586	RAT_EDL_F,RAT_EDL_M,RAT_SOL_F
chr10:59369684-59371003	RAT_EDL_F,RAT_EDL_M,RAT_SOL_F
chr10:59448859-59451205	RAT_EDL_F,RAT_EDL_M,RAT_SOL_F
chr10:59451323-59454945	RAT_EDL_F,RAT_EDL_M,RAT_SOL_F
chr10:59455150-59456648	RAT_SOL_F
chr10:59456810-59466453	RAT_SOL_F
chr10:59733158-59740659	RAT_SOL_F
chr10:59740823-59750503	RAT_EDL_F,RAT_EDL_M,RAT_SOL_F
chr10:59750548-59756705	RAT_EDL_F,RAT_EDL_M,RAT_SOL_F
chr10:59756718-59768137	RAT_EDL_M,RAT_SOL_F
chr10:59768253-59787940	RAT_EDL_M,RAT_SOL_F
chr10:59788024-59788878	RAT_EDL_F,RAT_EDL_M,RAT_SOL_F
chr10:59789077-59827188	RAT_EDL_F,RAT_EDL_M,RAT_SOL_F
chr10:59839784-59861562	RAT_EDL_F,RAT_EDL_M,RAT_SOL_F
chr10:59895761-59896349	RAT_EDL_F,RAT_EDL_M,RAT_SOL_F
chr10:59896448-59897490	RAT_EDL_F,RAT_EDL_M,RAT_SOL_F
chr10:59988839-59990832	RAT_EDL_F,RAT_EDL_M,RAT_SOL_F
chr10:60042258-60049751	RAT_EDL_F,RAT_EDL_M,RAT_SOL_F
chr10:60049872-60062459	RAT_EDL_F,RAT_EDL_M,RAT_SOL_F
chr10:60064409-60098092	RAT_EDL_F,RAT_EDL_M,RAT_SOL_F
chr10:60291773-60292504	RAT_EDL_F,RAT_EDL_M,RAT_SOL_F
chr10:60292580-60293348	RAT_EDL_F,RAT_EDL_M,RAT_SOL_F
chr10:60293475-60294532	RAT_EDL_F,RAT_EDL_M,RAT_SOL_F
chr10:60295109-60295945	RAT_EDL_M
chr10:60300306-60300537	RAT_EDL_F,RAT_EDL_M,RAT_SOL_F
chr10:60300619-60300773	RAT_EDL_F,RAT_EDL_M,RAT_SOL_F
chr10:60300882-60301693	RAT_EDL_F,RAT_EDL_M,RAT_SOL_F
chr10:61101009-61101680	RAT_EDL_M,RAT_SOL_F
chr10:61101802-61102567	RAT_EDL_M,RAT_SOL_F
chr10:61433829-61434917	RAT_EDL_M,RAT_SOL_F
chr10:61527210-61548047	RAT_EDL_F,RAT_EDL_M,RAT_SOL_F
chr10:61651619-61659448	RAT_EDL_M,RAT_SOL_F
chr10:61659503-61660911	RAT_EDL_F,RAT_EDL_M,RAT_SOL_F
chr10:61661032-61663689	RAT_EDL_M
chr10:61663777-61665339	RAT_EDL_M,RAT_SOL_F
chr10:61667039-61667584	RAT_EDL_F,RAT_EDL_M,RAT_SOL_F
chr10:61667671-61670417	RAT_EDL_F,RAT_EDL_M,RAT_SOL_F
chr10:61670488-61672390	RAT_EDL_F,RAT_EDL_M,RAT_SOL_F
chr10:61685186-61685553	RAT_EDL_F,RAT_EDL_M,RAT_SOL_F
chr10:61685620-61686374	RAT_EDL_F,RAT_EDL_M,RAT_SOL_F
chr10:61686479-61689773	RAT_EDL_F,RAT_EDL_M,RAT_SOL_F
chr10:61689906-61691284	RAT_EDL_F,RAT_EDL_M,RAT_SOL_F
chr10:62191585-62193866	RAT_EDL_F,RAT_EDL_M,RAT_SOL_F
chr10:62270057-62271588	RAT_EDL_M
chr10:62429835-62430470	RAT_EDL_M,RAT_SOL_F
chr10:62430620-62432288	RAT_EDL_M,RAT_SOL_F
chr10:62432466-62433051	RAT_EDL_M,RAT_SOL_F
chr10:62434615-62435458	RAT_EDL_F,RAT_EDL_M,RAT_SOL_F
chr10:62435553-62435645	RAT_EDL_F,RAT_EDL_M,RAT_SOL_F
chr10:62435827-62437433	RAT_EDL_M
chr10:62439052-62441134	RAT_EDL_M,RAT_SOL_F
chr10:62445154-62447023	RAT_EDL_M,RAT_SOL_F
chr10:62447132-62447695	RAT_EDL_M
chr10:62456859-62458923	RAT_EDL_F,RAT_EDL_M,RAT_SOL_F
chr10:62459067-62463690	RAT_EDL_F,RAT_EDL_M,RAT_SOL_F
chr10:62463760-62464631	RAT_EDL_F,RAT_EDL_M,RAT_SOL_F
chr10:62464739-62468289	RAT_EDL_F,RAT_EDL_M,RAT_SOL_F
chr10:62468455-62469900	RAT_EDL_F,RAT_EDL_M,RAT_SOL_F
chr10:62470058-62471059	RAT_EDL_F,RAT_EDL_M,RAT_SOL_F
chr10:62471136-62480557	RAT_EDL_F,RAT_EDL_M,RAT_SOL_F
chr10:62563352-62566036	RAT_SOL_F
chr10:62569643-62570398	RAT_EDL_M,RAT_SOL_F
chr10:62570479-62575049	RAT_EDL_M
chr10:62582608-62583053	RAT_SOL_F
chr10:62585685-62587463	RAT_EDL_F,RAT_EDL_M,RAT_SOL_F
chr10:62587538-62588003	RAT_EDL_M,RAT_SOL_F
chr10:62588819-62589777	RAT_EDL_M,RAT_SOL_F
chr10:62589928-62590620	RAT_EDL_F,RAT_EDL_M,RAT_SOL_F
chr10:62594141-62595035	RAT_EDL_M,RAT_SOL_F
chr10:62643373-62646913	RAT_EDL_F,RAT_EDL_M,RAT_SOL_F
chr10:62744823-62745262	RAT_EDL_F,RAT_EDL_M,RAT_SOL_F
chr10:62745469-62746900	RAT_EDL_F,RAT_EDL_M,RAT_SOL_F
chr10:62747465-62750546	RAT_EDL_F,RAT_EDL_M,RAT_SOL_F
chr10:62751855-62753173	RAT_SOL_F
chr10:62753414-62756482	RAT_SOL_F
chr10:62756675-62760093	RAT_EDL_F,RAT_EDL_M,RAT_SOL_F
chr10:62760280-62763439	RAT_EDL_F,RAT_EDL_M,RAT_SOL_F
chr10:62764535-62765266	RAT_EDL_M,RAT_SOL_F
chr10:62765434-62765941	RAT_EDL_F,RAT_EDL_M,RAT_SOL_F
chr10:62766056-62766556	RAT_EDL_F,RAT_EDL_M,RAT_SOL_F
chr10:62766783-62770854	RAT_EDL_M
chr10:62771017-62771935	RAT_EDL_F,RAT_EDL_M,RAT_SOL_F
chr10:62772066-62776567	RAT_EDL_M,RAT_SOL_F
chr10:62776761-62776848	RAT_EDL_F,RAT_EDL_M,RAT_SOL_F
chr10:62776964-62780440	RAT_EDL_F,RAT_EDL_M,RAT_SOL_F
chr10:62930437-62932718	RAT_EDL_F,RAT_EDL_M,RAT_SOL_F
chr10:62932783-62937417	RAT_EDL_F,RAT_EDL_M,RAT_SOL_F
chr10:62937995-62941041	RAT_EDL_M,RAT_SOL_F
chr10:62941205-62942650	RAT_EDL_M,RAT_SOL_F
chr10:63006755-63007673	RAT_EDL_M
chr10:63015715-63015801	RAT_EDL_F,RAT_SOL_F
chr10:63015895-63016079	RAT_EDL_F,RAT_EDL_M,RAT_SOL_F
chr10:63016176-63016406	RAT_EDL_F,RAT_EDL_M,RAT_SOL_F
chr10:63016543-63017221	RAT_EDL_F,RAT_EDL_M,RAT_SOL_F
chr10:63017338-63017523	RAT_EDL_F,RAT_EDL_M,RAT_SOL_F
chr10:63017611-63018040	RAT_EDL_F,RAT_EDL_M,RAT_SOL_F
chr10:63017611-63018085	RAT_EDL_F,RAT_EDL_M,RAT_SOL_F,RAT_SOL_M
chr10:63018226-63018759	RAT_EDL_F,RAT_EDL_M,RAT_SOL_F
chr10:63018226-63019392	RAT_EDL_F,RAT_EDL_M,RAT_SOL_F
chr10:63018899-63019392	RAT_EDL_F,RAT_EDL_M,RAT_SOL_F
chr10:63117027-63118420	RAT_EDL_F,RAT_EDL_M,RAT_SOL_F
chr10:63118555-63120028	RAT_EDL_F,RAT_EDL_M,RAT_SOL_F
chr10:63120195-63121901	RAT_EDL_F,RAT_EDL_M,RAT_SOL_F
chr10:63122110-63123270	RAT_EDL_M
chr10:63127778-63130982	RAT_EDL_F,RAT_EDL_M,RAT_SOL_F
chr10:63131205-63134932	RAT_EDL_F,RAT_EDL_M,RAT_SOL_F
chr10:63135072-63135707	RAT_EDL_F,RAT_EDL_M,RAT_SOL_F
chr10:63136296-63145835	RAT_EDL_M,RAT_SOL_F
chr10:63147994-63150022	RAT_EDL_F,RAT_EDL_M,RAT_SOL_F
chr10:63150047-63152794	RAT_EDL_F,RAT_EDL_M,RAT_SOL_F
chr10:63152937-63162221	RAT_EDL_F,RAT_EDL_M,RAT_SOL_F
chr10:63162294-63163512	RAT_EDL_F,RAT_EDL_M,RAT_SOL_F
chr10:63163625-63167232	RAT_EDL_F,RAT_EDL_M,RAT_SOL_F
chr10:63167285-63169254	RAT_EDL_F,RAT_EDL_M,RAT_SOL_F
chr10:63169431-63192386	RAT_EDL_F,RAT_EDL_M,RAT_SOL_F
chr10:63246126-63264025	RAT_EDL_M,RAT_SOL_F
chr10:63264186-63269627	RAT_EDL_F,RAT_EDL_M,RAT_SOL_F
chr10:63269705-63273450	RAT_EDL_M,RAT_SOL_F
chr10:63275089-63278334	RAT_EDL_M,RAT_SOL_F
chr10:63283342-63285651	RAT_SOL_F
chr10:63285729-63286016	RAT_EDL_F,RAT_EDL_M,RAT_SOL_F
chr10:63286142-63287518	RAT_EDL_F,RAT_EDL_M,RAT_SOL_F
chr10:63287579-63287897	RAT_SOL_F
chr10:63289242-63290503	RAT_SOL_F
chr10:63290677-63299119	RAT_EDL_F,RAT_EDL_M,RAT_SOL_F
chr10:63306447-63307741	RAT_EDL_F,RAT_EDL_M,RAT_SOL_F
chr10:63307910-63308306	RAT_EDL_F,RAT_EDL_M,RAT_SOL_F
chr10:63308451-63311466	RAT_EDL_F,RAT_EDL_M,RAT_SOL_F
chr10:63315844-63316699	RAT_EDL_F,RAT_EDL_M,RAT_SOL_F
chr10:63316803-63317279	RAT_EDL_F,RAT_EDL_M,RAT_SOL_F
chr10:63320965-63321748	RAT_EDL_F,RAT_EDL_M,RAT_SOL_F
chr10:63322301-63323966	RAT_EDL_F,RAT_EDL_M,RAT_SOL_F
chr10:63324154-63325125	RAT_EDL_F,RAT_EDL_M,RAT_SOL_F
chr10:63326187-63331744	RAT_EDL_F,RAT_EDL_M,RAT_SOL_F
chr10:63407207-63408188	RAT_EDL_F,RAT_EDL_M,RAT_SOL_F
chr10:63504136-63537520	RAT_SOL_F
chr10:63537714-63566803	RAT_SOL_F
chr10:63820486-63852621	RAT_SOL_F
chr10:64250779-64260812	RAT_SOL_F
chr10:64675917-64834577	RAT_SOL_F
chr10:64873343-64945918	RAT_SOL_F
chr10:64946025-64959769	RAT_EDL_M,RAT_SOL_F
chr10:67036006-67039500	RAT_SOL_F
chr10:67220636-67224008	RAT_SOL_F
chr10:67224182-67224736	RAT_SOL_F
chr10:67230050-67231971	RAT_EDL_F,RAT_EDL_M,RAT_SOL_F
chr10:67238198-67238806	RAT_EDL_F,RAT_EDL_M,RAT_SOL_F
chr10:67240942-67243771	RAT_EDL_F,RAT_EDL_M,RAT_SOL_F
chr10:67243941-67244782	RAT_EDL_F,RAT_EDL_M,RAT_SOL_F
chr10:67246157-67248010	RAT_EDL_F,RAT_EDL_M,RAT_SOL_F
chr10:67248151-67249629	RAT_EDL_F,RAT_EDL_M,RAT_SOL_F
chr10:67254584-67255447	RAT_EDL_F,RAT_EDL_M,RAT_SOL_F
chr10:68436966-68509696	RAT_EDL_F,RAT_EDL_M
chr10:68509770-68516265	RAT_EDL_F,RAT_EDL_M,RAT_SOL_F
chr10:68516411-68525597	RAT_EDL_M
chr10:69270874-69272738	RAT_SOL_F
chr10:69289056-69289519	RAT_EDL_F,RAT_EDL_M,RAT_SOL_F
chr10:69904271-69927694	RAT_EDL_M
chr10:69926192-69927694	RAT_SOL_F
chr10:69951059-69955925	RAT_EDL_M,RAT_SOL_F
chr10:69978700-69979317	RAT_EDL_F,RAT_EDL_M,RAT_SOL_F
chr10:69979444-69980271	RAT_EDL_M,RAT_SOL_F
chr10:69980395-69982115	RAT_EDL_F,RAT_EDL_M,RAT_SOL_F
chr10:69994447-69998094	RAT_EDL_F,RAT_EDL_M,RAT_SOL_F
chr10:69998227-69999354	RAT_EDL_F,RAT_EDL_M,RAT_SOL_F
chr10:69999499-70001922	RAT_EDL_M,RAT_SOL_F
chr10:69999499-70002510	RAT_EDL_F,RAT_EDL_M,RAT_SOL_F
chr10:70554590-70557239	RAT_EDL_M
chr10:71228700-71229086	RAT_EDL_F,RAT_EDL_M,RAT_SOL_F
chr10:71233453-71234864	RAT_EDL_M,RAT_SOL_F
chr10:71235614-71236915	RAT_EDL_M,RAT_SOL_F
chr10:71255875-71256614	RAT_EDL_F,RAT_EDL_M,RAT_SOL_F
chr10:71258307-71259741	RAT_EDL_F,RAT_EDL_M,RAT_SOL_F
chr10:71259820-71262083	RAT_EDL_M
chr10:71331127-71336213	RAT_EDL_F,RAT_EDL_M,RAT_SOL_F
chr10:72656074-72656237	RAT_EDL_M,RAT_SOL_F
chr10:75259144-75261793	RAT_EDL_M,RAT_SOL_F
chr10:75279962-75307236	RAT_EDL_F,RAT_EDL_M,RAT_SOL_F
chr10:75308094-75309789	RAT_EDL_M,RAT_SOL_F
chr10:75509834-75510031	RAT_SOL_F
chr10:75510124-75511120	RAT_EDL_M,RAT_SOL_F
chr10:75519461-75532176	RAT_EDL_F,RAT_EDL_M,RAT_SOL_F
chr10:75906197-75910153	RAT_EDL_M
chr10:75915194-75916772	RAT_EDL_M
chr10:75937455-75937574	RAT_EDL_F,RAT_EDL_M,RAT_SOL_F
chr10:7604384-7608543	RAT_EDL_F,RAT_EDL_M
chr10:76257173-76259927	RAT_EDL_M,RAT_SOL_F
chr10:76356397-76357034	RAT_EDL_M,RAT_SOL_F
chr10:76368834-76369834	RAT_SOL_F
chr10:7638226-7640044	RAT_EDL_M
chr10:76384906-76385703	RAT_EDL_F,RAT_EDL_M,RAT_SOL_F
chr10:76385871-76387426	RAT_SOL_F
chr10:7640816-7644324	RAT_EDL_M,RAT_SOL_F
chr10:7647622-7649050	RAT_EDL_F,RAT_EDL_M,RAT_SOL_F
chr10:76502806-76504162	RAT_EDL_M
chr10:76596812-76603328	RAT_EDL_M,RAT_SOL_F
chr10:76603368-76603461	RAT_EDL_M
chr10:76613321-76614108	RAT_EDL_F,RAT_EDL_M,RAT_SOL_F
chr10:76614130-76614336	RAT_EDL_F,RAT_EDL_M,RAT_SOL_F
chr10:7668125-7669552	RAT_EDL_F,RAT_EDL_M,RAT_SOL_F
chr10:76710182-76710345	RAT_EDL_F,RAT_EDL_M,RAT_SOL_F
chr10:76710376-76710961	RAT_EDL_F,RAT_EDL_M,RAT_SOL_F
chr10:7671120-7673584	RAT_SOL_F
chr10:76711685-76712267	RAT_EDL_F,RAT_EDL_M,RAT_SOL_F
chr10:76717463-76717794	RAT_EDL_M
chr10:76718544-76718978	RAT_EDL_M
chr10:76721006-76721087	RAT_EDL_M,RAT_SOL_F
chr10:76721109-76721262	RAT_EDL_M,RAT_SOL_F
chr10:76721284-76721402	RAT_EDL_F,RAT_EDL_M,RAT_SOL_F
chr10:76721532-76721815	RAT_EDL_M
chr10:7673721-7675005	RAT_EDL_M,RAT_SOL_F
chr10:7710956-7712500	RAT_SOL_F
chr10:77589743-77592845	RAT_EDL_M
chr10:77614052-77616147	RAT_EDL_F,RAT_EDL_M,RAT_SOL_F
chr10:77619733-77619760	RAT_EDL_M
chr10:77630762-77630848	RAT_EDL_F,RAT_EDL_M,RAT_SOL_F
chr10:77630895-77641459	RAT_EDL_F,RAT_EDL_M,RAT_SOL_F
chr10:77641579-77643468	RAT_EDL_F,RAT_EDL_M,RAT_SOL_F
chr10:7768586-7770356	RAT_EDL_F,RAT_EDL_M,RAT_SOL_F
chr10:7770521-7773297	RAT_EDL_M
chr10:7773432-7773947	RAT_EDL_F,RAT_EDL_M,RAT_SOL_F
chr10:7775370-7777773	RAT_EDL_F,RAT_EDL_M,RAT_SOL_F
chr10:7795862-7797757	RAT_SOL_F
chr10:7798558-7799552	RAT_SOL_F
chr10:7801970-7804955	RAT_EDL_F,RAT_EDL_M,RAT_SOL_F
chr10:7805023-7807270	RAT_EDL_F,RAT_SOL_F
chr10:7807383-7810361	RAT_EDL_F,RAT_EDL_M,RAT_SOL_F
chr10:78082657-78082715	RAT_EDL_M
chr10:7814812-7820951	RAT_EDL_F,RAT_EDL_M,RAT_SOL_F
chr10:78163554-78164837	RAT_EDL_F,RAT_EDL_M,RAT_SOL_F
chr10:78164931-78167394	RAT_EDL_M,RAT_SOL_F
chr10:78167515-78168808	RAT_EDL_F,RAT_EDL_M,RAT_SOL_F
chr10:78199145-78200617	RAT_EDL_F,RAT_EDL_M,RAT_SOL_F
chr10:78208033-78209383	RAT_EDL_F,RAT_EDL_M,RAT_SOL_F
chr10:78209476-78210377	RAT_EDL_F,RAT_EDL_M,RAT_SOL_F
chr10:78220385-78222663	RAT_EDL_F,RAT_EDL_M,RAT_SOL_F
chr10:78222861-78228778	RAT_SOL_F
chr10:78278086-78282373	RAT_EDL_F,RAT_EDL_M,RAT_SOL_F
chr10:79068052-79068633	RAT_EDL_M,RAT_SOL_F
chr10:7907578-7910046	RAT_EDL_F,RAT_EDL_M,RAT_SOL_F
chr10:7910128-7911088	RAT_EDL_F,RAT_EDL_M,RAT_SOL_F
chr10:7911549-7919113	RAT_EDL_F,RAT_EDL_M,RAT_SOL_F
chr10:7917890-7919113	RAT_EDL_F,RAT_EDL_M
chr10:7920615-7924684	RAT_EDL_F,RAT_EDL_M,RAT_SOL_F
chr10:79684905-79685004	RAT_EDL_F,RAT_EDL_M,RAT_SOL_F
chr10:79912770-79913224	RAT_EDL_M
chr10:79961113-79964925	RAT_EDL_M
chr10:79977854-79977962	RAT_EDL_M,RAT_SOL_F
chr10:79978476-79978547	RAT_EDL_M
chr10:79978606-79978692	RAT_EDL_F,RAT_EDL_M,RAT_SOL_F
chr10:79991482-79992272	RAT_SOL_F
chr10:80036974-80037187	RAT_EDL_M,RAT_SOL_F
chr10:80038614-80039582	RAT_EDL_M
chr10:80126370-80126653	RAT_EDL_M,RAT_SOL_F
chr10:80126782-80127044	RAT_EDL_F,RAT_EDL_M,RAT_SOL_F
chr10:80127103-80127903	RAT_EDL_M,RAT_SOL_F
chr10:80128101-80129904	RAT_EDL_F,RAT_EDL_M,RAT_SOL_F
chr10:80143986-80145218	RAT_EDL_F,RAT_EDL_M,RAT_SOL_F
chr10:80145308-80145422	RAT_EDL_F,RAT_EDL_M,RAT_SOL_F
chr10:80169917-80170015	RAT_EDL_M
chr10:80170123-80170201	RAT_EDL_F,RAT_EDL_M,RAT_SOL_F
chr10:80174326-80174816	RAT_EDL_F,RAT_EDL_M,RAT_SOL_F
chr10:80228439-80228994	RAT_EDL_M
chr10:80236182-80238314	RAT_EDL_M,RAT_SOL_F
chr10:80253784-80254839	RAT_EDL_M
chr10:80255020-80255089	RAT_EDL_M
chr10:80255137-80255923	RAT_EDL_M,RAT_SOL_F
chr10:80256013-80256635	RAT_EDL_F,RAT_EDL_M,RAT_SOL_F
chr10:80274615-80274803	RAT_EDL_M,RAT_SOL_F
chr10:80277683-80278232	RAT_EDL_M,RAT_SOL_F
chr10:80278282-80280928	RAT_SOL_F
chr10:80281012-80283023	RAT_EDL_M,RAT_SOL_F
chr10:80333597-80333688	RAT_SOL_F
chr10:80393281-80393892	RAT_EDL_M,RAT_SOL_F
chr10:80394657-80395063	RAT_EDL_M,RAT_SOL_F
chr10:80634642-80637887	RAT_EDL_M,RAT_SOL_F
chr10:80637929-80638009	RAT_EDL_M,RAT_SOL_F
chr10:80667333-80667612	RAT_EDL_M,RAT_SOL_F
chr10:80669041-80669154	RAT_EDL_F,RAT_EDL_M,RAT_SOL_F
chr10:80669211-80669297	RAT_EDL_F,RAT_EDL_M,RAT_SOL_F
chr10:80669403-80669629	RAT_EDL_M
chr10:80669704-80669895	RAT_EDL_F,RAT_EDL_M,RAT_SOL_F
chr10:80669976-80671558	RAT_EDL_F,RAT_EDL_M,RAT_SOL_F
chr10:80671657-80671735	RAT_EDL_F,RAT_EDL_M,RAT_SOL_F
chr10:80671838-80671927	RAT_SOL_F
chr10:80708538-80708746	RAT_EDL_M,RAT_SOL_F
chr10:80708869-80709200	RAT_EDL_M,RAT_SOL_F
chr10:80709957-80710419	RAT_EDL_M,RAT_SOL_F
chr10:80719389-80719666	RAT_EDL_M,RAT_SOL_F
chr10:80719813-80721119	RAT_EDL_M
chr10:80723607-80723690	RAT_EDL_M
chr10:80727184-80727881	RAT_EDL_M,RAT_SOL_F
chr10:80766238-80768604	RAT_EDL_M,RAT_SOL_F
chr10:80768669-80771137	RAT_EDL_M,RAT_SOL_F
chr10:80777612-80778262	RAT_SOL_F
chr10:80782185-80783183	RAT_SOL_F
chr10:80796655-80796731	RAT_EDL_M
chr10:80801528-80802397	RAT_EDL_M,RAT_SOL_F
chr10:80812105-80812294	RAT_EDL_M
chr10:80900260-80900481	RAT_EDL_M
chr10:80900551-80900623	RAT_EDL_M
chr10:81049358-81049781	RAT_EDL_M,RAT_SOL_F
chr10:81051084-81051222	RAT_EDL_M,RAT_SOL_F
chr10:81119161-81119256	RAT_EDL_M
chr10:81119382-81119489	RAT_EDL_F,RAT_EDL_M,RAT_SOL_F
chr10:81121111-81121902	RAT_EDL_M,RAT_SOL_F
chr10:81121965-81122566	RAT_EDL_F,RAT_EDL_M,RAT_SOL_F
chr10:81154579-81155590	RAT_EDL_M
chr10:81179260-81179345	RAT_EDL_F,RAT_EDL_M,RAT_SOL_F
chr10:81179452-81179543	RAT_EDL_F,RAT_EDL_M,RAT_SOL_F
chr10:81191912-81192296	RAT_EDL_M,RAT_SOL_F
chr10:81199711-81200024	RAT_EDL_F,RAT_EDL_M,RAT_SOL_F
chr10:81200097-81200291	RAT_EDL_M
chr10:81200581-81200890	RAT_EDL_M
chr10:81348033-81348495	RAT_EDL_M
chr10:81399393-81399415	RAT_EDL_M,RAT_SOL_F,RAT_SOL_M
chr10:81406215-81407554	RAT_EDL_M
chr10:81408230-81408334	RAT_EDL_F,RAT_EDL_M
chr10:81561317-81564094	RAT_EDL_F,RAT_EDL_M,RAT_SOL_F
chr10:81564159-81564672	RAT_EDL_F,RAT_EDL_M,RAT_SOL_F
chr10:81564718-81564847	RAT_EDL_F,RAT_EDL_M,RAT_SOL_F
chr10:81564911-81565291	RAT_EDL_F,RAT_EDL_M,RAT_SOL_F
chr10:81565367-81565471	RAT_EDL_M,RAT_SOL_F
chr10:81566010-81566482	RAT_EDL_M,RAT_SOL_M
chr10:82138380-82150216	RAT_SOL_F
chr10:82195144-82195337	RAT_EDL_M,RAT_SOL_F,RAT_SOL_M
chr10:82377364-82377699	RAT_SOL_M
chr10:82701068-82702442	RAT_EDL_M
chr10:82702604-82709008	RAT_EDL_M,RAT_SOL_F
chr10:82709218-82709963	RAT_SOL_F
chr10:82710049-82711834	RAT_SOL_F
chr10:82712239-82723618	RAT_EDL_M,RAT_SOL_F
chr10:82732677-82734349	RAT_SOL_F
chr10:82734482-82738278	RAT_EDL_F,RAT_EDL_M,RAT_SOL_F
chr10:82750818-82751383	RAT_EDL_M
chr10:82751466-82752406	RAT_EDL_M
chr10:82752605-82754964	RAT_EDL_F,RAT_EDL_M,RAT_SOL_F
chr10:82755096-82756701	RAT_EDL_F,RAT_EDL_M,RAT_SOL_F
chr10:82885294-82887172	RAT_EDL_F,RAT_EDL_M,RAT_SOL_F
chr10:83558946-83560365	RAT_EDL_M
chr10:83564538-83569967	RAT_EDL_M,RAT_SOL_F
chr10:83572240-83572357	RAT_EDL_F,RAT_EDL_M,RAT_SOL_F
chr10:83573882-83574442	RAT_SOL_F
chr10:83574560-83576016	RAT_SOL_F
chr10:83579557-83580256	RAT_EDL_F,RAT_EDL_M,RAT_SOL_F
chr10:83580362-83581256	RAT_EDL_F,RAT_EDL_M,RAT_SOL_F
chr10:83581392-83583254	RAT_EDL_M,RAT_SOL_F
chr10:83586721-83588156	RAT_EDL_M,RAT_SOL_F
chr10:83590388-83590986	RAT_EDL_M
chr10:83591184-83591688	RAT_EDL_M,RAT_SOL_F
chr10:83591789-83594170	RAT_EDL_F,RAT_EDL_M,RAT_SOL_F
chr10:83601042-83601882	RAT_SOL_F
chr10:83601931-83602757	RAT_EDL_F,RAT_EDL_M,RAT_SOL_F
chr10:83611067-83611142	RAT_EDL_F,RAT_SOL_F
chr10:83611200-83611449	RAT_SOL_F
chr10:84585056-84587103	RAT_EDL_M,RAT_SOL_F
chr10:84590005-84591087	RAT_EDL_F,RAT_EDL_M,RAT_SOL_F
chr10:84591309-84594647	RAT_EDL_F,RAT_EDL_M,RAT_SOL_F
chr10:84594785-84604506	RAT_EDL_F,RAT_EDL_M,RAT_SOL_F
chr10:84604689-84604885	RAT_EDL_F,RAT_EDL_M,RAT_SOL_F
chr10:84608638-84613481	RAT_EDL_F,RAT_EDL_M,RAT_SOL_F
chr10:84674720-84676882	RAT_SOL_F
chr10:84684305-84692796	RAT_SOL_F
chr10:84695714-84696948	RAT_SOL_F
chr10:84958111-84969862	RAT_EDL_F,RAT_EDL_M,RAT_SOL_F
chr10:84970092-84970728	RAT_SOL_F
chr10:84970825-84980047	RAT_SOL_F
chr10:85001902-85015075	RAT_EDL_F,RAT_EDL_M,RAT_SOL_F
chr10:85110866-85114407	RAT_SOL_F
chr10:85143842-85144153	RAT_EDL_M,RAT_SOL_F
chr10:85146656-85146735	RAT_EDL_F,RAT_EDL_M,RAT_SOL_F
chr10:85899344-85900841	RAT_EDL_M,RAT_SOL_F
chr10:85901157-85901703	RAT_EDL_M
chr10:85905499-85907275	RAT_EDL_M
chr10:85930508-85930592	RAT_EDL_M
chr10:85939120-85941898	RAT_EDL_M,RAT_SOL_F
chr10:85942019-85942487	RAT_EDL_M,RAT_SOL_F
chr10:85943398-85943814	RAT_EDL_F,RAT_EDL_M,RAT_SOL_F
chr10:85946351-85947176	RAT_EDL_M,RAT_SOL_F
chr10:85947334-85949465	RAT_EDL_F,RAT_EDL_M,RAT_SOL_F
chr10:85949623-85951354	RAT_EDL_M,RAT_SOL_F
chr10:85951455-85953436	RAT_EDL_M
chr10:85955798-85957614	RAT_EDL_M,RAT_SOL_F
chr10:86338456-86343932	RAT_EDL_M,RAT_SOL_F
chr10:86344045-86344553	RAT_EDL_F,RAT_EDL_M,RAT_SOL_F
chr10:86348246-86348688	RAT_EDL_M
chr10:86692465-86693376	RAT_EDL_F,RAT_EDL_M,RAT_SOL_F
chr10:86693514-86693913	RAT_EDL_F,RAT_EDL_M,RAT_SOL_F
chr10:86694620-86695476	RAT_EDL_F,RAT_EDL_M,RAT_SOL_F
chr10:86695543-86695659	RAT_EDL_F,RAT_EDL_M,RAT_SOL_F
chr10:86695964-86696718	RAT_EDL_F,RAT_EDL_M,RAT_SOL_F
chr10:86698439-86698583	RAT_EDL_F,RAT_EDL_M,RAT_SOL_F
chr10:86698696-86701696	RAT_EDL_F,RAT_EDL_M,RAT_SOL_F
chr10:86702029-86702908	RAT_EDL_F,RAT_EDL_M,RAT_SOL_F
chr10:86703026-86703459	RAT_EDL_F,RAT_EDL_M,RAT_SOL_F
chr10:86703602-86704293	RAT_EDL_F,RAT_EDL_M,RAT_SOL_F
chr10:86804966-86811529	RAT_EDL_F,RAT_EDL_M,RAT_SOL_F
chr10:86811605-86812324	RAT_EDL_F,RAT_EDL_M,RAT_SOL_F
chr10:86820771-86820909	RAT_EDL_F,RAT_EDL_M,RAT_SOL_F
chr10:86821012-86823063	RAT_EDL_M
chr10:86823146-86824186	RAT_EDL_F,RAT_EDL_M,RAT_SOL_F
chr10:86824274-86825154	RAT_EDL_F,RAT_EDL_M,RAT_SOL_F
chr10:8751486-8756628	RAT_EDL_M
chr10:87859413-87864730	RAT_EDL_M,RAT_SOL_F
chr10:88148380-88153523	RAT_SOL_F
chr10:88158931-88160875	RAT_SOL_F
chr10:88172086-88174385	RAT_EDL_M,RAT_SOL_F
chr10:88174568-88174882	RAT_EDL_F,RAT_EDL_M,RAT_SOL_F
chr10:88201293-88201811	RAT_EDL_M,RAT_SOL_F
chr10:88201911-88213646	RAT_EDL_F,RAT_EDL_M,RAT_SOL_F
chr10:88213713-88215966	RAT_EDL_F,RAT_EDL_M,RAT_SOL_F
chr10:88219361-88234393	RAT_EDL_F,RAT_EDL_M,RAT_SOL_F
chr10:88234459-88245755	RAT_EDL_M,RAT_SOL_F
chr10:88439214-88439450	RAT_EDL_F,RAT_EDL_M,RAT_SOL_F
chr10:88439550-88440223	RAT_EDL_F,RAT_EDL_M,RAT_SOL_F
chr10:88472985-88475332	RAT_EDL_F,RAT_EDL_M
chr10:88472985-88475425	RAT_EDL_F,RAT_EDL_M,RAT_SOL_F
chr10:88475537-88476347	RAT_EDL_F,RAT_EDL_M,RAT_SOL_F
chr10:88476474-88477009	RAT_EDL_F,RAT_EDL_M,RAT_SOL_F
chr10:88477169-88480814	RAT_EDL_F,RAT_EDL_M,RAT_SOL_F
chr10:88480947-88482230	RAT_EDL_F,RAT_EDL_M,RAT_SOL_F
chr10:88482316-88488381	RAT_EDL_F,RAT_EDL_M,RAT_SOL_F
chr10:88488524-88489580	RAT_EDL_F,RAT_EDL_M,RAT_SOL_F
chr10:88489729-88503584	RAT_EDL_F,RAT_EDL_M,RAT_SOL_F
chr10:88518570-88519900	RAT_EDL_F,RAT_EDL_M,RAT_SOL_F
chr10:88518570-88522966	RAT_SOL_F,RAT_SOL_M
chr10:88519944-88521276	RAT_EDL_F,RAT_EDL_M,RAT_SOL_F
chr10:88519944-88522966	RAT_EDL_F,RAT_EDL_M,RAT_SOL_F
chr10:88521336-88522966	RAT_EDL_F,RAT_EDL_M,RAT_SOL_F
chr10:88523154-88524968	RAT_EDL_F,RAT_EDL_M,RAT_SOL_F
chr10:88525106-88526281	RAT_EDL_F,RAT_EDL_M,RAT_SOL_F
chr10:88526442-88529424	RAT_EDL_F,RAT_EDL_M,RAT_SOL_F
chr10:88533574-88536314	RAT_EDL_F,RAT_EDL_M,RAT_SOL_F
chr10:88536483-88537465	RAT_EDL_F,RAT_EDL_M,RAT_SOL_F
chr10:88536483-88540948	RAT_EDL_F,RAT_EDL_M,RAT_SOL_F
chr10:88537520-88540948	RAT_EDL_F,RAT_EDL_M,RAT_SOL_F
chr10:88541084-88542327	RAT_EDL_F,RAT_EDL_M,RAT_SOL_F
chr10:88542517-88543717	RAT_EDL_F,RAT_EDL_M,RAT_SOL_F
chr10:88543823-88545971	RAT_EDL_F,RAT_EDL_M,RAT_SOL_F
chr10:88546132-88548767	RAT_EDL_F,RAT_EDL_M,RAT_SOL_F
chr10:88548902-88549256	RAT_EDL_F,RAT_EDL_M,RAT_SOL_F
chr10:88549364-88551393	RAT_EDL_F,RAT_EDL_M,RAT_SOL_F
chr10:88553423-88554663	RAT_EDL_F,RAT_EDL_M,RAT_SOL_F
chr10:88554770-88555615	RAT_EDL_F,RAT_EDL_M,RAT_SOL_F
chr10:88555741-88558570	RAT_EDL_F,RAT_EDL_M,RAT_SOL_F
chr10:88558704-88560223	RAT_EDL_F,RAT_EDL_M,RAT_SOL_F
chr10:88560391-88566507	RAT_EDL_F,RAT_EDL_M,RAT_SOL_F
chr10:88566565-88568597	RAT_EDL_F,RAT_EDL_M,RAT_SOL_F
chr10:88568650-88570538	RAT_EDL_F,RAT_EDL_M,RAT_SOL_F
chr10:88570657-88571519	RAT_EDL_F,RAT_EDL_M,RAT_SOL_F
chr10:88571669-88573415	RAT_EDL_F,RAT_EDL_M,RAT_SOL_F
chr10:88573530-88575128	RAT_EDL_F,RAT_EDL_M,RAT_SOL_F
chr10:88573530-88582006	RAT_EDL_F,RAT_EDL_M,RAT_SOL_F
chr10:88575165-88575841	RAT_EDL_F,RAT_EDL_M,RAT_SOL_F
chr10:88575881-88582006	RAT_EDL_F,RAT_EDL_M,RAT_SOL_F
chr10:88582049-88585659	RAT_EDL_F,RAT_EDL_M,RAT_SOL_F
chr10:88585696-88604900	RAT_EDL_F,RAT_EDL_M,RAT_SOL_F
chr10:88733681-88735897	RAT_EDL_F,RAT_EDL_M,RAT_SOL_F
chr10:88735980-88737090	RAT_EDL_F,RAT_EDL_M,RAT_SOL_F
chr10:88747422-88748225	RAT_SOL_F
chr10:88754660-88754750	RAT_EDL_M
chr10:88757136-88757856	RAT_EDL_M,RAT_SOL_F
chr10:89642111-89645461	RAT_SOL_F
chr10:89645744-89646758	RAT_EDL_F,RAT_EDL_M,RAT_SOL_F
chr10:89650084-89650827	RAT_SOL_F
chr10:89650961-89652942	RAT_EDL_F,RAT_EDL_M,RAT_SOL_F
chr10:89656885-89657809	RAT_EDL_M,RAT_SOL_F
chr10:89657936-89659238	RAT_EDL_F,RAT_EDL_M,RAT_SOL_F
chr10:89659356-89660134	RAT_EDL_F,RAT_EDL_M,RAT_SOL_F
chr10:89662466-89666716	RAT_SOL_F
chr10:89666862-89669644	RAT_EDL_F,RAT_EDL_M,RAT_SOL_F
chr10:89715009-89717072	RAT_EDL_F,RAT_EDL_M,RAT_SOL_F
chr10:89725079-89725170	RAT_EDL_F,RAT_EDL_M,RAT_SOL_F
chr10:89725659-89725767	RAT_EDL_F,RAT_EDL_M,RAT_SOL_F
chr10:89726761-89728153	RAT_EDL_F,RAT_EDL_M,RAT_SOL_F
chr10:89728223-89728899	RAT_EDL_M,RAT_SOL_F
chr10:89809779-89811486	RAT_SOL_F
chr10:90612136-90612168	RAT_EDL_M
chr10:91117125-91117212	RAT_EDL_F,RAT_EDL_M,RAT_SOL_F
chr10:91117324-91118043	RAT_EDL_F,RAT_EDL_M,RAT_SOL_F
chr10:91118217-91118698	RAT_EDL_F,RAT_EDL_M,RAT_SOL_F
chr10:91118881-91119526	RAT_EDL_F,RAT_EDL_M,RAT_SOL_F
chr10:91119707-91122206	RAT_EDL_F,RAT_EDL_M,RAT_SOL_F,RAT_SOL_M
chr10:91151798-91152627	RAT_EDL_F,RAT_EDL_M,RAT_SOL_F
chr10:91152739-91158747	RAT_EDL_M
chr10:91158846-91164042	RAT_EDL_M
chr10:91163362-91164042	RAT_SOL_F
chr10:91164202-91165942	RAT_EDL_F,RAT_EDL_M,RAT_SOL_F
chr10:92686296-92686719	RAT_EDL_M,RAT_SOL_F
chr10:92686787-92689634	RAT_SOL_F
chr10:92692037-92692887	RAT_SOL_F
chr10:92698366-92698725	RAT_EDL_F,RAT_EDL_M,RAT_SOL_F
chr10:93225051-93226023	RAT_EDL_M
chr10:93235536-93236026	RAT_EDL_M,RAT_SOL_F
chr10:93239044-93239587	RAT_EDL_F,RAT_SOL_F
chr10:93265681-93284768	RAT_EDL_M,RAT_SOL_F
chr10:93467165-93468755	RAT_SOL_F
chr10:93468829-93469047	RAT_EDL_M,RAT_SOL_F
chr10:93471367-93471853	RAT_EDL_F,RAT_EDL_M,RAT_SOL_F
chr10:93482333-93482961	RAT_EDL_F,RAT_EDL_M,RAT_SOL_F
chr10:93483067-93484662	RAT_EDL_F,RAT_EDL_M,RAT_SOL_F
chr10:93861603-93862376	RAT_EDL_F,RAT_EDL_M,RAT_SOL_F
chr10:93863034-93865406	RAT_EDL_F,RAT_EDL_M,RAT_SOL_F
chr10:93868962-93870116	RAT_EDL_M,RAT_SOL_F
chr10:93870299-93871487	RAT_EDL_M,RAT_SOL_F
chr10:93871650-93879539	RAT_EDL_F,RAT_EDL_M,RAT_SOL_F
chr10:93879643-93880072	RAT_EDL_F,RAT_EDL_M,RAT_SOL_F
chr10:93880139-93886993	RAT_EDL_F,RAT_EDL_M,RAT_SOL_F
chr10:93970705-93973834	RAT_EDL_F,RAT_EDL_M,RAT_SOL_F
chr10:93974546-93980313	RAT_EDL_M,RAT_SOL_F
chr10:93980508-93984161	RAT_EDL_M
chr10:93984494-93990139	RAT_EDL_F,RAT_EDL_M,RAT_SOL_F
chr10:93993655-93996837	RAT_SOL_F
chr10:93993667-93996837	RAT_EDL_F,RAT_EDL_M,RAT_SOL_F
chr10:94000524-94003992	RAT_EDL_F,RAT_EDL_M,RAT_SOL_F
chr10:94004083-94006959	RAT_EDL_F,RAT_EDL_M,RAT_SOL_F
chr10:94007095-94035669	RAT_EDL_M,RAT_SOL_F
chr10:94162445-94163728	RAT_SOL_F
chr10:94188289-94190618	RAT_EDL_F,RAT_EDL_M,RAT_SOL_F
chr10:94719120-94719591	RAT_EDL_F,RAT_EDL_M,RAT_SOL_F
chr10:94725740-94728590	RAT_EDL_F,RAT_EDL_M,RAT_SOL_F
chr10:94728723-94737772	RAT_EDL_F,RAT_EDL_M,RAT_SOL_F
chr10:94749056-94750258	RAT_EDL_F,RAT_EDL_M,RAT_SOL_F
chr10:94750404-94750509	RAT_EDL_F,RAT_EDL_M,RAT_SOL_F
chr10:94766518-94768818	RAT_EDL_F,RAT_EDL_M,RAT_SOL_F
chr10:94771075-94786743	RAT_EDL_F,RAT_EDL_M,RAT_SOL_F
chr10:94786848-94788646	RAT_EDL_F,RAT_EDL_M,RAT_SOL_F
chr10:95549861-95551448	RAT_EDL_M,RAT_SOL_F
chr10:95994999-95995568	RAT_SOL_F
chr10:95995691-95996936	RAT_SOL_F
chr10:96013426-96018005	RAT_SOL_F
chr10:96020032-96021606	RAT_SOL_F
chr10:96037546-96038692	RAT_EDL_F,RAT_EDL_M,RAT_SOL_F
chr10:96039762-96040251	RAT_SOL_F
chr10:97483559-97495001	RAT_EDL_F,RAT_EDL_M,RAT_SOL_F
chr10:97495115-97506492	RAT_EDL_F,RAT_EDL_M,RAT_SOL_F
chr10:97506707-97507702	RAT_EDL_F,RAT_EDL_M,RAT_SOL_F
chr10:97513738-97517460	RAT_EDL_F,RAT_EDL_M,RAT_SOL_F
chr10:97569107-97571896	RAT_EDL_F,RAT_EDL_M,RAT_SOL_F
chr10:97609670-97612808	RAT_EDL_F,RAT_EDL_M,RAT_SOL_F
chr10:9770690-9778020	RAT_EDL_M
chr10:9808599-9809028	RAT_EDL_M,RAT_SOL_F
chr10:9811709-9811964	RAT_EDL_F
chr10:9812033-9812259	RAT_EDL_M,RAT_SOL_F
chr10:9812408-9816250	RAT_SOL_F
chr10:9835958-9838076	RAT_SOL_F
chr10:98969125-98979703	RAT_EDL_M,RAT_SOL_F
chr10:98979902-98986890	RAT_EDL_F,RAT_EDL_M,RAT_SOL_F
chr10:98987146-98987240	RAT_EDL_F,RAT_EDL_M,RAT_SOL_F
chr10:98991203-98993866	RAT_EDL_F,RAT_EDL_M,RAT_SOL_F
chr10:98993906-98994645	RAT_EDL_M,RAT_SOL_F
chr10:98994808-98996767	RAT_EDL_M,RAT_SOL_F
chr10:98999982-99001287	RAT_EDL_M,RAT_SOL_F
chr10:99003379-99009403	RAT_EDL_M,RAT_SOL_F
chr10:99009584-99010201	RAT_EDL_F,RAT_EDL_M,RAT_SOL_F
chr10:99010290-99010673	RAT_EDL_F,RAT_EDL_M,RAT_SOL_F
chr10:99010781-99014458	RAT_SOL_F
chr10:99017031-99018714	RAT_EDL_F,RAT_EDL_M,RAT_SOL_F
chr10:99264982-99265991	RAT_SOL_F
chr1:10025064-10027102	RAT_EDL_F,RAT_EDL_M,RAT_SOL_F
chr1:10027252-10030598	RAT_EDL_F,RAT_EDL_M,RAT_SOL_F
chr1:10030711-10032338	RAT_EDL_F,RAT_EDL_M,RAT_SOL_F
chr1:10032425-10033257	RAT_EDL_F,RAT_EDL_M,RAT_SOL_F
chr1:10033324-10034007	RAT_EDL_F,RAT_EDL_M,RAT_SOL_F
chr1:10034137-10034928	RAT_EDL_F,RAT_EDL_M,RAT_SOL_F
chr1:10035164-10037669	RAT_EDL_F,RAT_EDL_M,RAT_SOL_F
chr1:10059848-10064332	RAT_SOL_F
chr1:10090318-10095865	RAT_SOL_F
chr1:10108482-10112392	RAT_SOL_F
chr1:10113708-10116017	RAT_SOL_F
chr1:10138997-10140466	RAT_EDL_F,RAT_EDL_M,RAT_SOL_F
chr1:10141698-10142575	RAT_EDL_F,RAT_EDL_M,RAT_SOL_F
chr1:10142745-10144717	RAT_EDL_F,RAT_EDL_M,RAT_SOL_F
chr1:10144858-10147402	RAT_EDL_F,RAT_EDL_M,RAT_SOL_F
chr1:10153525-10153606	RAT_EDL_F,RAT_EDL_M,RAT_SOL_F
chr1:10153743-10154280	RAT_EDL_F,RAT_EDL_M,RAT_SOL_F
chr1:10154411-10156913	RAT_EDL_F,RAT_EDL_M,RAT_SOL_F
chr1:10157045-10157899	RAT_EDL_F,RAT_EDL_M,RAT_SOL_F
chr1:10159741-10159876	RAT_EDL_F,RAT_EDL_M,RAT_SOL_F
chr1:10163788-10172833	RAT_EDL_M,RAT_SOL_F
chr1:10172985-10173193	RAT_EDL_M,RAT_SOL_F
chr1:10173353-10174066	RAT_EDL_M,RAT_SOL_F
chr1:10179978-10180869	RAT_EDL_F,RAT_EDL_M,RAT_SOL_F
chr1:10181042-10183662	RAT_EDL_M,RAT_SOL_F
chr1:10183748-10183975	RAT_EDL_F,RAT_EDL_M,RAT_SOL_F
chr1:10184182-10184385	RAT_EDL_F,RAT_EDL_M,RAT_SOL_F
chr1:10184498-10188756	RAT_EDL_F,RAT_SOL_F
chr1:10188959-10189226	RAT_EDL_F,RAT_EDL_M,RAT_SOL_F
chr1:10189336-10189438	RAT_EDL_F,RAT_EDL_M,RAT_SOL_F
chr1:10189679-10194256	RAT_EDL_F,RAT_SOL_F
chr1:10194492-10198842	RAT_SOL_F
chr1:10209702-10213043	RAT_EDL_M,RAT_SOL_F
chr1:10213224-10214124	RAT_EDL_M,RAT_SOL_F
chr1:105692110-105692211	RAT_SOL_F
chr1:105713940-105716777	RAT_SOL_F
chr1:105719617-105721267	RAT_SOL_F
chr1:105726467-105727939	RAT_EDL_F,RAT_SOL_F
chr1:105727989-105731200	RAT_SOL_F
chr1:105736023-105740434	RAT_SOL_F
chr1:105740518-105741296	RAT_SOL_F
chr1:105743350-105746068	RAT_EDL_F,RAT_EDL_M,RAT_SOL_F
chr1:105751044-105753502	RAT_EDL_F,RAT_EDL_M,RAT_SOL_F
chr1:106006087-106011701	RAT_SOL_F
chr1:106018303-106019847	RAT_EDL_M,RAT_SOL_F
chr1:106023265-106023663	RAT_SOL_F
chr1:106023759-106027402	RAT_EDL_M
chr1:106344921-106347084	RAT_EDL_F,RAT_EDL_M,RAT_SOL_F
chr1:106347181-106350531	RAT_EDL_F,RAT_SOL_F
chr1:106386522-106389673	RAT_EDL_F,RAT_EDL_M,RAT_SOL_F
chr1:106727731-106734546	RAT_SOL_F
chr1:106743861-106747487	RAT_EDL_M,RAT_SOL_F
chr1:106780111-106780503	RAT_EDL_F,RAT_EDL_M,RAT_SOL_F
chr1:106786771-106789928	RAT_EDL_M,RAT_SOL_F
chr11:100236524-100236561	RAT_EDL_M,RAT_SOL_F,RAT_SOL_M
chr11:100321050-100321316	RAT_EDL_F
chr11:100372462-100372655	RAT_EDL_M
chr11:100372696-100374077	RAT_EDL_M
chr11:100423600-100423887	RAT_EDL_M,RAT_SOL_F
chr11:100429950-100431076	RAT_SOL_F
chr11:100431278-100432917	RAT_SOL_F
chr11:100576906-100578912	RAT_SOL_F
chr11:100583137-100583593	RAT_EDL_F,RAT_EDL_M,RAT_SOL_F
chr11:100583657-100584210	RAT_EDL_F,RAT_EDL_M,RAT_SOL_F
chr11:100584364-100584551	RAT_EDL_F,RAT_EDL_M,RAT_SOL_F
chr11:100584699-100584981	RAT_EDL_F,RAT_EDL_M,RAT_SOL_F
chr11:100585056-100589897	RAT_EDL_F,RAT_EDL_M,RAT_SOL_F
chr11:100589779-100589897	RAT_SOL_F
chr11:100589990-100590886	RAT_EDL_F,RAT_EDL_M,RAT_SOL_F
chr11:100591052-100591411	RAT_EDL_F,RAT_EDL_M,RAT_SOL_F
chr11:100591566-100592854	RAT_EDL_F,RAT_EDL_M,RAT_SOL_F
chr11:100592974-100596165	RAT_EDL_F,RAT_EDL_M,RAT_SOL_F
chr11:100596241-100598614	RAT_EDL_F,RAT_EDL_M,RAT_SOL_F
chr11:100598729-100599184	RAT_EDL_M,RAT_SOL_F
chr11:100599310-100601727	RAT_EDL_F,RAT_EDL_M,RAT_SOL_F
chr11:100705996-100706082	RAT_EDL_M
chr11:100706198-100706349	RAT_EDL_M,RAT_SOL_F
chr11:100709490-100710249	RAT_EDL_M
chr11:100716163-100716757	RAT_EDL_F,RAT_EDL_M,RAT_SOL_F
chr11:100716852-100717841	RAT_EDL_M
chr11:100717965-100718430	RAT_EDL_F,RAT_EDL_M,RAT_SOL_F
chr11:100718583-100719914	RAT_EDL_M
chr11:100787380-100788368	RAT_EDL_M
chr11:100788762-100790746	RAT_EDL_M
chr11:100794637-100796418	RAT_EDL_F,RAT_EDL_M,RAT_SOL_F
chr11:100796542-100796617	RAT_EDL_M
chr11:100805027-100808395	RAT_EDL_F,RAT_EDL_M,RAT_SOL_F
chr11:100861878-100863130	RAT_EDL_M
chr11:100865506-100874002	RAT_EDL_M
chr11:100889591-100889885	RAT_EDL_M,RAT_SOL_F
chr11:100889929-100893073	RAT_EDL_M,RAT_SOL_F
chr11:100893287-100893664	RAT_SOL_F
chr11:100893805-100893890	RAT_EDL_F,RAT_EDL_M,RAT_SOL_F
chr11:100894837-100895063	RAT_EDL_F,RAT_EDL_M,RAT_SOL_F
chr11:100898499-100898607	RAT_EDL_M,RAT_SOL_F
chr11:100898702-100898793	RAT_EDL_F,RAT_EDL_M,RAT_SOL_F
chr11:100898824-100902736	RAT_SOL_F
chr11:100903515-100903603	RAT_SOL_F
chr11:100905299-100905592	RAT_EDL_F,RAT_EDL_M,RAT_SOL_F
chr11:100908090-100908659	RAT_EDL_F,RAT_EDL_M,RAT_SOL_F
chr11:101011938-101018563	RAT_SOL_F
chr11:101018643-101020472	RAT_EDL_F,RAT_EDL_M,RAT_SOL_F
chr11:101020571-101021053	RAT_EDL_F,RAT_EDL_M,RAT_SOL_F
chr11:101021183-101026659	RAT_SOL_F
chr11:101029259-101030409	RAT_EDL_F,RAT_EDL_M,RAT_SOL_F
chr11:101030504-101033900	RAT_EDL_F,RAT_EDL_M,RAT_SOL_F
chr11:101036873-101038158	RAT_EDL_M,RAT_SOL_F
chr11:101038299-101038689	RAT_EDL_F,RAT_EDL_M,RAT_SOL_F
chr11:101039912-101042949	RAT_EDL_F,RAT_EDL_M,RAT_SOL_F
chr11:101043069-101043790	RAT_EDL_F,RAT_EDL_M,RAT_SOL_F
chr11:101044008-101044515	RAT_EDL_F,RAT_EDL_M,RAT_SOL_F
chr11:101044624-101048417	RAT_EDL_F,RAT_EDL_M,RAT_SOL_F
chr11:101048526-101055025	RAT_EDL_M,RAT_SOL_F
chr11:101088326-101088597	RAT_EDL_M,RAT_SOL_F
chr11:101089033-101089218	RAT_EDL_F,RAT_EDL_M,RAT_SOL_F
chr11:101089319-101089667	RAT_EDL_F,RAT_EDL_M,RAT_SOL_F
chr11:101092457-101092531	RAT_SOL_F
chr11:101092592-101092723	RAT_EDL_F,RAT_EDL_M,RAT_SOL_F
chr11:101092778-101092862	RAT_EDL_F,RAT_EDL_M,RAT_SOL_F
chr11:101098621-101099007	RAT_SOL_F
chr11:101101060-101102005	RAT_EDL_F,RAT_EDL_M,RAT_SOL_F
chr11:101102091-101102882	RAT_EDL_M,RAT_SOL_F
chr11:101103921-101106306	RAT_EDL_M
chr11:101120999-101122672	RAT_EDL_F,RAT_EDL_M,RAT_SOL_F
chr11:101122742-101123413	RAT_EDL_M,RAT_SOL_F
chr11:101123494-101123912	RAT_EDL_F,RAT_EDL_M,RAT_SOL_F
chr11:101193000-101193218	RAT_EDL_F,RAT_EDL_M,RAT_SOL_F
chr11:101193304-101193725	RAT_EDL_F,RAT_EDL_M,RAT_SOL_F
chr11:101193807-101194467	RAT_EDL_M,RAT_SOL_F
chr11:101195698-101199257	RAT_EDL_M,RAT_SOL_F
chr11:101199384-101199945	RAT_EDL_F,RAT_EDL_M,RAT_SOL_F
chr11:101199987-101200835	RAT_EDL_F,RAT_EDL_M,RAT_SOL_F
chr11:101203452-101203760	RAT_SOL_F
chr11:101208286-101209379	RAT_EDL_M,RAT_SOL_F
chr11:101210724-101213723	RAT_EDL_F,RAT_EDL_M,RAT_SOL_F
chr11:101213845-101215182	RAT_EDL_F,RAT_EDL_M,RAT_SOL_F
chr11:101215303-101216994	RAT_EDL_F,RAT_EDL_M,RAT_SOL_F
chr11:101217124-101217242	RAT_EDL_M,RAT_SOL_F
chr11:101247145-101247585	RAT_EDL_M
chr11:101254997-101256008	RAT_EDL_F
chr11:101256098-101256877	RAT_EDL_F,RAT_EDL_M,RAT_SOL_F
chr11:101256954-101258909	RAT_EDL_F,RAT_EDL_M,RAT_SOL_F
chr11:101288982-101289782	RAT_EDL_F,RAT_EDL_M,RAT_SOL_F
chr11:101289926-101290438	RAT_EDL_F,RAT_EDL_M,RAT_SOL_F
chr11:101290500-101291382	RAT_EDL_F,RAT_EDL_M,RAT_SOL_F
chr11:101291533-101294000	RAT_EDL_F,RAT_EDL_M,RAT_SOL_F
chr11:101294148-101294969	RAT_EDL_F,RAT_EDL_M,RAT_SOL_F
chr11:101295432-101295533	RAT_EDL_F,RAT_EDL_M,RAT_SOL_F
chr11:101295625-101296257	RAT_EDL_F,RAT_EDL_M,RAT_SOL_F
chr11:101296317-101299008	RAT_EDL_F,RAT_EDL_M,RAT_SOL_F
chr11:101299077-101301727	RAT_EDL_M
chr11:101317392-101317622	RAT_EDL_F,RAT_EDL_M,RAT_SOL_F
chr11:101317728-101319455	RAT_EDL_F,RAT_EDL_M,RAT_SOL_F
chr11:101319505-101319911	RAT_EDL_F,RAT_EDL_M,RAT_SOL_F
chr11:101320025-101320210	RAT_EDL_F,RAT_EDL_M,RAT_SOL_F
chr11:101320280-101320396	RAT_EDL_F,RAT_EDL_M,RAT_SOL_F
chr11:101320465-101320560	RAT_EDL_F,RAT_EDL_M,RAT_SOL_F
chr11:101320616-101320726	RAT_EDL_F,RAT_EDL_M,RAT_SOL_F
chr11:101320814-101321791	RAT_EDL_F,RAT_EDL_M,RAT_SOL_F
chr11:101336479-101337384	RAT_EDL_F,RAT_EDL_M,RAT_SOL_F
chr11:101409708-101410113	RAT_EDL_M
chr11:101410206-101410353	RAT_EDL_F,RAT_EDL_M,RAT_SOL_F
chr11:101410892-101411082	RAT_EDL_M,RAT_SOL_F
chr11:101419187-101419674	RAT_EDL_F,RAT_EDL_M,RAT_SOL_F
chr11:101421955-101423779	RAT_EDL_M
chr11:101423879-101423976	RAT_EDL_F,RAT_EDL_M,RAT_SOL_F
chr11:101424044-101424154	RAT_EDL_F,RAT_EDL_M
chr11:101429611-101431347	RAT_EDL_M,RAT_SOL_F
chr11:101457338-101457415	RAT_EDL_M
chr11:101556292-101559518	RAT_EDL_F,RAT_EDL_M,RAT_SOL_F
chr11:101559582-101560432	RAT_EDL_F,RAT_EDL_M,RAT_SOL_F
chr11:101560452-101562296	RAT_EDL_F,RAT_EDL_M,RAT_SOL_F
chr11:101562320-101564628	RAT_EDL_F,RAT_EDL_M,RAT_SOL_F
chr11:101565782-101566195	RAT_EDL_M,RAT_SOL_F
chr11:101566411-101567094	RAT_EDL_M,RAT_SOL_F
chr11:101567263-101568398	RAT_EDL_F,RAT_EDL_M,RAT_SOL_F
chr11:101568609-101569255	RAT_EDL_F,RAT_EDL_M,RAT_SOL_F
chr11:101569416-101569497	RAT_EDL_F,RAT_EDL_M,RAT_SOL_F
chr11:101571434-101571901	RAT_EDL_M,RAT_SOL_F
chr11:101571978-101572461	RAT_EDL_F,RAT_EDL_M,RAT_SOL_F
chr11:101572973-101573102	RAT_EDL_F,RAT_EDL_M,RAT_SOL_F
chr11:101573178-101574998	RAT_EDL_F,RAT_EDL_M,RAT_SOL_F
chr11:101577252-101577931	RAT_EDL_M,RAT_SOL_F
chr11:101737767-101738129	RAT_EDL_M,RAT_SOL_F
chr11:101764958-101766639	RAT_SOL_F
chr11:101974940-101981616	RAT_EDL_M
chr11:102002147-102004989	RAT_EDL_F,RAT_EDL_M
chr11:102193227-102193442	RAT_EDL_M
chr11:102196118-102196237	RAT_EDL_M
chr11:102196673-102197058	RAT_EDL_M,RAT_SOL_F
chr11:102197178-102197338	RAT_EDL_F,RAT_EDL_M,RAT_SOL_F
chr11:102197437-102197665	RAT_EDL_M,RAT_SOL_F
chr11:102199474-102199635	RAT_EDL_M
chr11:102201405-102202052	RAT_EDL_M
chr11:102269124-102272486	RAT_EDL_F,RAT_EDL_M,RAT_SOL_F
chr11:102277292-102277875	RAT_EDL_M,RAT_SOL_F
chr11:102285719-102287307	RAT_EDL_F,RAT_EDL_M,RAT_SOL_F
chr11:102287872-102288075	RAT_EDL_F
chr11:102292208-102292441	RAT_SOL_F
chr11:102292486-102292704	RAT_EDL_F,RAT_EDL_M,RAT_SOL_F
chr11:102292774-102293066	RAT_EDL_F,RAT_EDL_M,RAT_SOL_F
chr11:102293096-102293275	RAT_EDL_F,RAT_EDL_M,RAT_SOL_F
chr11:102293322-102293645	RAT_EDL_M,RAT_SOL_F
chr11:102293669-102293843	RAT_SOL_F
chr11:102294306-102294509	RAT_EDL_M,RAT_SOL_F
chr11:102307151-102307243	RAT_EDL_M,RAT_SOL_F
chr11:102308139-102308228	RAT_EDL_F,RAT_EDL_M,RAT_SOL_F
chr11:102308318-102308698	RAT_EDL_F,RAT_EDL_M,RAT_SOL_F
chr11:102308810-102308893	RAT_EDL_M,RAT_SOL_F
chr11:102309768-102309867	RAT_EDL_M,RAT_SOL_F
chr11:102310577-102311379	RAT_EDL_F,RAT_EDL_M,RAT_SOL_F
chr11:102311501-102311753	RAT_EDL_M,RAT_SOL_F
chr11:102311819-102313897	RAT_EDL_F,RAT_EDL_M,RAT_SOL_F
chr11:102314054-102314138	RAT_EDL_F,RAT_EDL_M,RAT_SOL_F
chr11:102314223-102314863	RAT_EDL_F,RAT_EDL_M,RAT_SOL_F
chr11:102403536-102403632	RAT_EDL_F,RAT_EDL_M
chr11:102403873-102404030	RAT_EDL_F,RAT_EDL_M,RAT_SOL_F
chr11:102405080-102405692	RAT_EDL_M
chr11:102405827-102406205	RAT_EDL_M,RAT_SOL_F
chr11:102434510-102434702	RAT_EDL_M
chr11:102435492-102435708	RAT_EDL_M,RAT_SOL_F
chr11:102436249-102436334	RAT_EDL_M,RAT_SOL_F
chr11:102487631-102500802	RAT_EDL_F,RAT_EDL_M,RAT_SOL_F
chr11:102500947-102507442	RAT_SOL_F
chr11:102507530-102508143	RAT_EDL_M,RAT_SOL_F
chr11:102838897-102839149	RAT_EDL_M
chr11:102839574-102840023	RAT_EDL_M
chr11:102841528-102841681	RAT_EDL_F,RAT_EDL_M,RAT_SOL_F
chr11:102841769-102843349	RAT_EDL_F,RAT_EDL_M,RAT_SOL_F
chr11:102843433-102844139	RAT_EDL_M
chr11:102846237-102846584	RAT_EDL_F,RAT_EDL_M,RAT_SOL_F
chr11:102846697-102847957	RAT_EDL_M
chr11:102851893-102854778	RAT_EDL_M,RAT_SOL_F
chr11:102854870-102855223	RAT_EDL_M,RAT_SOL_F
chr11:102855288-102860001	RAT_EDL_F,RAT_EDL_M,RAT_SOL_F
chr11:102860127-102862610	RAT_EDL_F,RAT_EDL_M,RAT_SOL_F
chr11:102862778-102864707	RAT_EDL_M,RAT_SOL_F
chr11:102864791-102865569	RAT_EDL_M,RAT_SOL_F
chr11:102865661-102867845	RAT_EDL_M,RAT_SOL_F
chr11:102867882-102868586	RAT_EDL_F,RAT_EDL_M,RAT_SOL_F
chr11:102868653-102869094	RAT_EDL_F,RAT_EDL_M,RAT_SOL_F
chr11:102869171-102870167	RAT_EDL_F,RAT_EDL_M,RAT_SOL_F
chr11:102870247-102871019	RAT_EDL_M
chr11:102871183-102877609	RAT_EDL_M,RAT_SOL_F
chr11:102871186-102877609	RAT_EDL_F,RAT_EDL_M,RAT_SOL_F
chr11:103043277-103046378	RAT_EDL_F,RAT_EDL_M,RAT_SOL_F
chr11:103046524-103052205	RAT_EDL_F,RAT_EDL_M,RAT_SOL_F
chr11:103052325-103055197	RAT_EDL_F,RAT_EDL_M,RAT_SOL_F
chr11:103055290-103056382	RAT_EDL_M,RAT_SOL_F
chr11:103056500-103057364	RAT_EDL_M,RAT_SOL_F
chr11:103057536-103058204	RAT_SOL_F
chr11:103063976-103064729	RAT_EDL_F,RAT_EDL_M,RAT_SOL_F
chr11:103064868-103065747	RAT_EDL_F,RAT_EDL_M,RAT_SOL_F
chr11:103679398-103683791	RAT_EDL_M
chr11:103823260-103823738	RAT_SOL_F
chr11:103882942-103910442	RAT_SOL_F
chr11:103973064-103981693	RAT_EDL_M,RAT_SOL_F
chr11:104282481-104287122	RAT_EDL_M,RAT_SOL_F
chr11:104318250-104321350	RAT_EDL_M,RAT_SOL_F
chr11:104321433-104322427	RAT_EDL_M
chr11:104322541-104327971	RAT_EDL_F,RAT_EDL_M,RAT_SOL_F
chr11:104330314-104330329	RAT_SOL_M
chr11:104336334-104336548	RAT_EDL_F,RAT_EDL_M,RAT_SOL_F
chr11:104336607-104338125	RAT_EDL_M,RAT_SOL_F
chr11:104343048-104343490	RAT_SOL_F
chr11:104343674-104350486	RAT_SOL_F
chr11:104350653-104356683	RAT_EDL_M
chr11:104356877-104357480	RAT_EDL_M
chr11:104357597-104368679	RAT_SOL_F
chr11:104368779-104378684	RAT_SOL_F
chr11:104504982-104505000	RAT_EDL_F,RAT_EDL_M,RAT_SOL_F,RAT_SOL_M
chr11:104505064-104505083	RAT_EDL_F,RAT_EDL_M,RAT_SOL_F,RAT_SOL_M
chr11:104505681-104507137	RAT_EDL_F,RAT_EDL_M,RAT_SOL_F
chr11:104507295-104508346	RAT_EDL_F,RAT_EDL_M,RAT_SOL_F
chr11:104510300-104512900	RAT_EDL_F,RAT_EDL_M,RAT_SOL_F
chr11:104513019-104515371	RAT_EDL_F,RAT_EDL_M,RAT_SOL_F
chr11:104515581-104517375	RAT_EDL_F,RAT_EDL_M,RAT_SOL_F
chr11:104517529-104520663	RAT_EDL_F,RAT_EDL_M,RAT_SOL_F
chr11:104520837-104521380	RAT_EDL_F,RAT_EDL_M,RAT_SOL_F
chr11:104521589-104522722	RAT_EDL_M,RAT_SOL_F
chr11:104526978-104528262	RAT_EDL_F,RAT_EDL_M,RAT_SOL_F
chr11:104528475-104528577	RAT_EDL_F,RAT_EDL_M,RAT_SOL_F
chr11:104528733-104529340	RAT_EDL_F,RAT_EDL_M,RAT_SOL_F
chr11:104529439-104531729	RAT_EDL_M,RAT_SOL_F
chr11:104531856-104534737	RAT_EDL_F,RAT_EDL_M,RAT_SOL_F
chr11:105132581-105135337	RAT_EDL_F,RAT_EDL_M,RAT_SOL_F
chr11:105240457-105241568	RAT_EDL_M,RAT_SOL_F
chr11:105241662-105246773	RAT_EDL_F,RAT_EDL_M,RAT_SOL_F
chr11:105246885-105247458	RAT_EDL_F,RAT_EDL_M,RAT_SOL_F
chr11:105247596-105249484	RAT_EDL_F,RAT_EDL_M,RAT_SOL_F
chr11:105253358-105254965	RAT_EDL_F,RAT_EDL_M,RAT_SOL_F
chr11:105255064-105256869	RAT_EDL_F,RAT_EDL_M,RAT_SOL_F
chr11:105256952-105260260	RAT_EDL_F,RAT_EDL_M,RAT_SOL_F
chr11:105260353-105267152	RAT_EDL_F,RAT_EDL_M,RAT_SOL_F
chr11:105267243-105269625	RAT_EDL_F,RAT_EDL_M,RAT_SOL_F
chr11:105269796-105271098	RAT_EDL_F,RAT_EDL_M,RAT_SOL_F
chr11:105271238-105275836	RAT_EDL_F,RAT_EDL_M,RAT_SOL_F
chr11:105275949-105279117	RAT_EDL_F,RAT_EDL_M,RAT_SOL_F
chr11:105279226-105281084	RAT_EDL_F,RAT_EDL_M,RAT_SOL_F
chr11:105976704-105976951	RAT_EDL_M,RAT_SOL_F
chr11:105981596-105981767	RAT_EDL_M,RAT_SOL_F
chr11:105985269-105985572	RAT_EDL_F,RAT_EDL_M,RAT_SOL_F
chr11:105986089-105988015	RAT_EDL_F,RAT_EDL_M,RAT_SOL_F
chr11:106069613-106071866	RAT_SOL_F
chr11:106071995-106072530	RAT_SOL_F
chr11:106110785-106114183	RAT_EDL_M,RAT_SOL_F
chr11:106117604-106123785	RAT_EDL_F,RAT_EDL_M,RAT_SOL_F
chr11:106145760-106148564	RAT_EDL_M
chr11:106148907-106149481	RAT_EDL_F,RAT_EDL_M,RAT_SOL_F
chr11:106202179-106202383	RAT_EDL_F,RAT_EDL_M,RAT_SOL_F
chr11:106202494-106202727	RAT_EDL_F,RAT_EDL_M,RAT_SOL_F
chr11:106202787-106203537	RAT_EDL_F,RAT_EDL_M,RAT_SOL_F
chr11:106203624-106204920	RAT_EDL_F,RAT_EDL_M,RAT_SOL_F
chr11:106205032-106205359	RAT_EDL_F,RAT_EDL_M,RAT_SOL_F
chr11:106208072-106208194	RAT_EDL_F,RAT_EDL_M,RAT_SOL_F
chr11:106210463-106211672	RAT_EDL_F,RAT_EDL_M,RAT_SOL_F
chr11:106224319-106224783	RAT_EDL_M,RAT_SOL_F
chr11:106224935-106228762	RAT_SOL_F
chr11:106228825-106230329	RAT_SOL_F
chr11:106230367-106231131	RAT_EDL_F,RAT_EDL_M,RAT_SOL_F
chr11:106231282-106232805	RAT_EDL_F,RAT_EDL_M,RAT_SOL_F
chr11:106232911-106234851	RAT_EDL_M,RAT_SOL_F
chr11:106235784-106236994	RAT_SOL_F
chr11:106237124-106238507	RAT_SOL_F
chr11:106238608-106239135	RAT_EDL_M
chr11:106239184-106240001	RAT_EDL_F,RAT_EDL_M,RAT_SOL_F
chr11:106245438-106246775	RAT_EDL_M,RAT_SOL_F
chr11:106246878-106247491	RAT_EDL_F,RAT_EDL_M,RAT_SOL_F
chr11:106250057-106250154	RAT_EDL_F,RAT_EDL_M,RAT_SOL_F
chr11:106250255-106250347	RAT_EDL_F,RAT_EDL_M,RAT_SOL_F
chr11:106252339-106252427	RAT_SOL_F
chr11:106252747-106252899	RAT_SOL_F
chr11:106253186-106253288	RAT_SOL_F
chr11:106256920-106260852	RAT_EDL_F,RAT_EDL_M,RAT_SOL_F
chr11:106260923-106261184	RAT_EDL_F,RAT_EDL_M,RAT_SOL_F
chr11:106261283-106261422	RAT_EDL_F,RAT_EDL_M,RAT_SOL_F
chr11:106262033-106262117	RAT_EDL_F,RAT_EDL_M,RAT_SOL_F
chr11:106262309-106262403	RAT_EDL_F,RAT_EDL_M,RAT_SOL_F
chr11:106262503-106262580	RAT_EDL_F,RAT_EDL_M,RAT_SOL_F
chr11:106262692-106262796	RAT_EDL_F,RAT_EDL_M,RAT_SOL_F
chr11:106262884-106263008	RAT_EDL_M,RAT_SOL_F
chr11:106264556-106264671	RAT_EDL_M
chr11:106266693-106266890	RAT_SOL_F
chr11:106322179-106322787	RAT_EDL_F,RAT_EDL_M,RAT_SOL_F
chr11:106322893-106323875	RAT_EDL_F,RAT_EDL_M,RAT_SOL_F
chr11:106324014-106324207	RAT_EDL_F,RAT_EDL_M,RAT_SOL_F
chr11:106326880-106327510	RAT_EDL_F,RAT_EDL_M
chr11:106341576-106342310	RAT_EDL_F,RAT_EDL_M,RAT_SOL_F
chr11:106342521-106343891	RAT_EDL_M
chr11:106344034-106344213	RAT_EDL_F,RAT_EDL_M,RAT_SOL_F
chr11:106344278-106345414	RAT_EDL_F,RAT_EDL_M
chr11:106347849-106348271	RAT_EDL_F,RAT_EDL_M,RAT_SOL_F
chr11:106348793-106348899	RAT_EDL_M
chr11:106349019-106349116	RAT_EDL_M
chr11:106503719-106506866	RAT_EDL_F,RAT_EDL_M,RAT_SOL_F
chr11:106513713-106519881	RAT_EDL_F,RAT_EDL_M,RAT_SOL_F
chr11:106520015-106529261	RAT_EDL_F
chr11:106529362-106533870	RAT_EDL_F,RAT_EDL_M,RAT_SOL_F
chr11:106547004-106548713	RAT_EDL_F,RAT_EDL_M,RAT_SOL_F
chr11:106548915-106566964	RAT_SOL_F
chr11:106655163-106662001	RAT_EDL_M,RAT_SOL_F
chr11:106655163-106679548	RAT_EDL_M,RAT_SOL_F
chr11:106671799-106679548	RAT_EDL_M,RAT_SOL_F
chr11:106679612-106681031	RAT_EDL_M
chr11:106681086-106682879	RAT_EDL_F,RAT_EDL_M,RAT_SOL_F
chr11:106683621-106684227	RAT_EDL_F,RAT_EDL_M,RAT_SOL_F
chr11:106784019-106784100	RAT_EDL_F,RAT_EDL_M,RAT_SOL_F
chr11:106784525-106784879	RAT_EDL_F,RAT_EDL_M,RAT_SOL_F
chr11:106785053-106785135	RAT_EDL_F,RAT_EDL_M,RAT_SOL_F
chr11:106815638-106815733	RAT_EDL_F
chr11:106815809-106816652	RAT_SOL_F
chr11:106824811-106828503	RAT_SOL_F
chr11:106828625-106830919	RAT_EDL_F,RAT_EDL_M,RAT_SOL_F
chr11:106831058-106833744	RAT_EDL_F,RAT_EDL_M,RAT_SOL_F
chr11:106839292-106841599	RAT_SOL_F
chr11:106841796-106845982	RAT_EDL_M,RAT_SOL_F
chr11:106859797-106864711	RAT_EDL_M,RAT_SOL_F
chr11:106864778-106868534	RAT_EDL_M,RAT_SOL_F
chr11:107053015-107053222	RAT_SOL_F
chr11:107168390-107171091	RAT_EDL_F,RAT_EDL_M,RAT_SOL_F
chr11:107171694-107173209	RAT_EDL_M
chr11:107173730-107175565	RAT_EDL_F,RAT_EDL_M,RAT_SOL_F
chr11:107175748-107176782	RAT_EDL_F,RAT_EDL_M,RAT_SOL_F
chr11:107179093-107180041	RAT_EDL_F,RAT_EDL_M,RAT_SOL_F
chr11:107180119-107180912	RAT_EDL_M,RAT_SOL_F
chr11:107181102-107181738	RAT_EDL_F,RAT_EDL_M,RAT_SOL_F
chr11:107183631-107184739	RAT_EDL_M,RAT_SOL_F
chr11:107184889-107186634	RAT_SOL_F
chr11:107186692-107186808	RAT_EDL_F,RAT_EDL_M,RAT_SOL_F
chr11:107234503-107252021	RAT_EDL_M,RAT_SOL_F
chr11:107485610-107485707	RAT_EDL_M
chr11:107485837-107486413	RAT_EDL_F,RAT_EDL_M,RAT_SOL_F
chr11:107486522-107488967	RAT_EDL_F,RAT_EDL_M,RAT_SOL_F
chr11:107489073-107491780	RAT_EDL_F,RAT_EDL_M,RAT_SOL_F
chr11:107491931-107492016	RAT_EDL_F,RAT_EDL_M,RAT_SOL_F
chr11:107492152-107493402	RAT_EDL_F,RAT_EDL_M,RAT_SOL_F
chr11:107493516-107494629	RAT_EDL_F,RAT_EDL_M,RAT_SOL_F
chr11:107494805-107495687	RAT_EDL_F,RAT_EDL_M,RAT_SOL_F
chr11:107495766-107497523	RAT_EDL_F,RAT_EDL_M,RAT_SOL_F
chr11:107635099-107636165	RAT_SOL_F
chr11:107703891-107704304	RAT_EDL_F,RAT_EDL_M,RAT_SOL_F
chr11:107704443-107705776	RAT_EDL_F,RAT_EDL_M,RAT_SOL_F
chr11:107978373-107979202	RAT_EDL_F,RAT_EDL_M,RAT_SOL_F
chr11:107984059-107986247	RAT_EDL_F,RAT_EDL_M,RAT_SOL_F
chr11:108013080-108014224	RAT_EDL_F,RAT_EDL_M,RAT_SOL_F
chr11:108054104-108057761	RAT_EDL_M
chr11:108057874-108192129	RAT_EDL_M
chr11:109392397-109395913	RAT_SOL_F
chr11:109434054-109434579	RAT_EDL_F,RAT_EDL_M,RAT_SOL_F
chr11:109434757-109436562	RAT_SOL_F
chr11:109573968-109577056	RAT_EDL_M,RAT_SOL_F
chr11:109577694-109578290	RAT_EDL_M,RAT_SOL_F
chr11:109582480-109583126	RAT_EDL_F,RAT_EDL_M,RAT_SOL_F
chr11:109584168-109585094	RAT_EDL_M,RAT_SOL_F
chr11:109585193-109597102	RAT_EDL_F,RAT_EDL_M,RAT_SOL_F
chr11:109597200-109603672	RAT_EDL_F,RAT_EDL_M,RAT_SOL_F
chr11:109603843-109605884	RAT_EDL_F,RAT_EDL_M,RAT_SOL_F
chr11:109660170-109661034	RAT_SOL_F
chr11:109661127-109661287	RAT_EDL_F,RAT_SOL_F
chr11:109661350-109662275	RAT_EDL_F,RAT_EDL_M,RAT_SOL_F
chr11:109662323-109662948	RAT_EDL_F,RAT_EDL_M,RAT_SOL_F
chr11:109663108-109664758	RAT_EDL_F,RAT_EDL_M,RAT_SOL_F
chr11:109664820-109665864	RAT_EDL_F,RAT_EDL_M,RAT_SOL_F
chr11:109665987-109666643	RAT_EDL_M,RAT_SOL_F
chr11:109666726-109667429	RAT_EDL_M,RAT_SOL_F
chr11:110026904-110028130	RAT_EDL_F,RAT_EDL_M,RAT_SOL_F
chr11:110028211-110029918	RAT_EDL_F,RAT_EDL_M
chr11:110030060-110030280	RAT_EDL_M
chr11:110030955-110031044	RAT_EDL_M
chr11:110038461-110040500	RAT_EDL_F,RAT_EDL_M,RAT_SOL_F
chr11:110040622-110042092	RAT_EDL_F,RAT_EDL_M,RAT_SOL_F
chr11:110051016-110053015	RAT_EDL_F,RAT_EDL_M,RAT_SOL_F
chr11:110060047-110063021	RAT_EDL_F,RAT_EDL_M,RAT_SOL_F
chr11:110068165-110068777	RAT_EDL_M,RAT_SOL_F
chr11:110069514-110069788	RAT_EDL_F,RAT_EDL_M,RAT_SOL_F
chr11:110070489-110071419	RAT_EDL_F,RAT_EDL_M,RAT_SOL_F
chr11:110071531-110071827	RAT_EDL_F,RAT_EDL_M,RAT_SOL_F
chr11:110074203-110075538	RAT_EDL_M,RAT_SOL_F
chr11:110078810-110079072	RAT_EDL_F,RAT_EDL_M,RAT_SOL_F
chr11:110083537-110084161	RAT_EDL_M
chr11:110102064-110102510	RAT_EDL_F,RAT_EDL_M,RAT_SOL_F
chr11:110272567-110273325	RAT_SOL_F
chr11:110399426-110482538	RAT_EDL_F,RAT_EDL_M,RAT_SOL_F
chr11:110490194-110490761	RAT_EDL_F,RAT_EDL_M,RAT_SOL_F
chr11:110492633-110492895	RAT_EDL_M
chr11:110493013-110494294	RAT_EDL_F,RAT_EDL_M,RAT_SOL_F
chr11:110494347-110496338	RAT_EDL_F,RAT_EDL_M,RAT_SOL_F
chr11:110496467-110497896	RAT_EDL_F,RAT_EDL_M,RAT_SOL_F
chr11:110497975-110499382	RAT_EDL_F,RAT_EDL_M,RAT_SOL_F
chr11:110499523-110506705	RAT_EDL_F,RAT_EDL_M,RAT_SOL_F
chr11:110506752-110512788	RAT_EDL_F,RAT_EDL_M,RAT_SOL_F
chr11:111066335-111071548	RAT_SOL_F
chr1:11132414-11136764	RAT_SOL_F
chr11:113657537-113658478	RAT_EDL_M,RAT_SOL_F
chr1:11140099-11140235	RAT_SOL_F
chr11:114707735-114708416	RAT_EDL_M
chr11:115183266-115183354	RAT_EDL_M
chr11:115409540-115410059	RAT_EDL_M,RAT_SOL_F
chr11:115410143-115410231	RAT_EDL_F,RAT_EDL_M,RAT_SOL_F
chr11:115422092-115424483	RAT_SOL_F
chr11:115429406-115430312	RAT_EDL_M,RAT_SOL_F
chr11:115498300-115500665	RAT_EDL_F,RAT_EDL_M,RAT_SOL_F
chr11:115566764-115568362	RAT_EDL_F,RAT_EDL_M,RAT_SOL_F
chr11:115568434-115568678	RAT_SOL_F
chr11:115580588-115580729	RAT_EDL_M
chr11:115582040-115582876	RAT_EDL_M,RAT_SOL_F
chr11:115589137-115590395	RAT_EDL_M
chr11:115604913-115605022	RAT_EDL_F,RAT_EDL_M,RAT_SOL_F
chr11:115605087-115605969	RAT_EDL_F,RAT_EDL_M,RAT_SOL_F
chr11:115606138-115606817	RAT_EDL_M
chr11:115609436-115609538	RAT_EDL_M,RAT_SOL_F
chr11:115645955-115646709	RAT_EDL_F,RAT_EDL_M,RAT_SOL_F
chr11:115655456-115699151	RAT_EDL_M
chr11:115796818-115797129	RAT_EDL_M
chr11:115935476-115938009	RAT_EDL_M
chr11:115938058-115951966	RAT_EDL_F,RAT_EDL_M,RAT_SOL_F
chr11:115952010-115957360	RAT_SOL_F
chr11:115957450-115960499	RAT_SOL_F
chr11:115960592-115961355	RAT_EDL_F,RAT_EDL_M,RAT_SOL_F
chr11:115961417-115961738	RAT_EDL_F,RAT_EDL_M,RAT_SOL_F
chr11:115961791-115962493	RAT_EDL_M,RAT_SOL_F
chr11:115962553-115963942	RAT_EDL_M,RAT_SOL_F
chr11:116022536-116022666	RAT_EDL_F,RAT_EDL_M,RAT_SOL_F,RAT_SOL_M
chr11:116082412-116083838	RAT_EDL_F,RAT_EDL_M,RAT_SOL_F
chr11:116132131-116132419	RAT_EDL_F,RAT_EDL_M,RAT_SOL_F
chr11:116134506-116134907	RAT_EDL_M,RAT_SOL_F
chr11:116173599-116174292	RAT_EDL_F,RAT_EDL_M,RAT_SOL_F
chr11:116174500-116174630	RAT_EDL_F,RAT_EDL_M,RAT_SOL_F
chr11:116178311-116178681	RAT_EDL_M,RAT_SOL_F
chr11:116183625-116198221	RAT_EDL_M,RAT_SOL_F
chr11:116198382-116198595	RAT_EDL_M,RAT_SOL_F
chr11:116247946-116248730	RAT_EDL_F,RAT_EDL_M,RAT_SOL_F
chr11:116248826-116250735	RAT_EDL_M
chr11:116250893-116252728	RAT_EDL_M,RAT_SOL_F
chr11:116260935-116261744	RAT_EDL_M
chr11:116261828-116262859	RAT_EDL_M,RAT_SOL_F
chr11:116262970-116263214	RAT_EDL_F,RAT_EDL_M,RAT_SOL_F
chr11:116271980-116273925	RAT_EDL_F,RAT_EDL_M,RAT_SOL_F
chr11:116289286-116289524	RAT_EDL_M,RAT_SOL_F
chr11:116289659-116289949	RAT_EDL_M
chr11:116289992-116290206	RAT_EDL_M,RAT_SOL_F
chr11:116290271-116291138	RAT_EDL_M
chr11:116291235-116291453	RAT_EDL_M
chr11:116294039-116294406	RAT_EDL_M
chr11:116295690-116297570	RAT_EDL_M,RAT_SOL_F
chr11:116301327-116304576	RAT_SOL_F
chr11:116304683-116304863	RAT_EDL_M
chr11:116478116-116478524	RAT_EDL_M,RAT_SOL_F
chr11:116479825-116485868	RAT_EDL_M,RAT_SOL_F
chr11:116539712-116539798	RAT_EDL_M,RAT_SOL_F
chr11:116543733-116543865	RAT_EDL_M
chr11:116840546-116841068	RAT_EDL_M
chr11:116841356-116842331	RAT_EDL_F,RAT_EDL_M,RAT_SOL_F
chr11:116849139-116849215	RAT_EDL_F,RAT_EDL_M,RAT_SOL_F
chr11:116850354-116850855	RAT_EDL_F,RAT_EDL_M,RAT_SOL_F
chr11:116850962-116851647	RAT_SOL_F
chr11:116858582-116859298	RAT_EDL_M
chr11:116861668-116863905	RAT_EDL_F,RAT_EDL_M,RAT_SOL_F
chr11:117117253-117141417	RAT_SOL_F
chr11:117141568-117141661	RAT_EDL_M
chr11:117141794-117143286	RAT_EDL_F,RAT_EDL_M,RAT_SOL_F
chr11:117143416-117143780	RAT_EDL_F,RAT_EDL_M,RAT_SOL_F
chr11:117352278-117352606	RAT_EDL_M
chr11:117359471-117360422	RAT_EDL_M,RAT_SOL_F
chr11:117702401-117714125	RAT_SOL_F
chr11:117747297-117749243	RAT_EDL_M,RAT_SOL_F
chr11:117756107-117757936	RAT_SOL_F
chr11:117812697-117813045	RAT_EDL_F,RAT_EDL_M,RAT_SOL_F
chr11:117813186-117813277	RAT_EDL_M
chr11:118000277-118001615	RAT_EDL_F,RAT_EDL_M,RAT_SOL_F
chr11:118001716-118002350	RAT_EDL_F,RAT_EDL_M,RAT_SOL_F
chr11:118002541-118003340	RAT_EDL_M,RAT_SOL_F
chr11:118169171-118170825	RAT_EDL_M,RAT_SOL_F
chr11:118170898-118177219	RAT_EDL_M,RAT_SOL_F
chr11:118185053-118185380	RAT_EDL_M,RAT_SOL_F
chr11:118185500-118185759	RAT_EDL_M,RAT_SOL_F
chr11:118185827-118192396	RAT_EDL_F,RAT_EDL_M,RAT_SOL_F
chr11:118262131-118262388	RAT_EDL_M,RAT_SOL_F
chr11:118273657-118274967	RAT_EDL_M,RAT_SOL_F
chr11:118310701-118317418	RAT_EDL_F,RAT_EDL_M,RAT_SOL_F
chr11:118317528-118320108	RAT_EDL_F,RAT_EDL_M,RAT_SOL_F
chr11:119274761-119274855	RAT_EDL_M
chr11:119277615-119277693	RAT_EDL_M
chr11:119284600-119285004	RAT_EDL_M,RAT_SOL_F
chr11:119288560-119288659	RAT_EDL_F,RAT_EDL_M,RAT_SOL_F
chr11:11933610-11934198	RAT_EDL_M,RAT_SOL_F
chr11:11934293-11936717	RAT_EDL_F,RAT_EDL_M,RAT_SOL_F
chr11:11937924-11938409	RAT_EDL_F,RAT_EDL_M,RAT_SOL_F
chr11:11938485-11943881	RAT_EDL_M,RAT_SOL_F
chr11:11943981-11944815	RAT_EDL_F,RAT_EDL_M,RAT_SOL_F
chr11:11944927-11945494	RAT_EDL_M
chr11:11945633-11945963	RAT_EDL_M,RAT_SOL_F
chr11:11946803-11951502	RAT_EDL_M,RAT_SOL_F
chr11:119476555-119477048	RAT_SOL_F
chr11:119479948-119480750	RAT_EDL_M,RAT_SOL_F
chr11:11951660-11954743	RAT_EDL_F,RAT_EDL_M,RAT_SOL_F
chr11:119603972-119657663	RAT_SOL_F
chr11:119887152-119888541	RAT_EDL_M,RAT_SOL_F
chr11:119917010-119917983	RAT_EDL_M
chr11:119919361-119919660	RAT_EDL_M,RAT_SOL_M
chr11:119919667-119919725	RAT_EDL_M,RAT_SOL_M
chr1:11200053-11204065	RAT_SOL_F
chr11:120068148-120068697	RAT_SOL_F
chr11:120075711-120076088	RAT_EDL_M
chr11:120347350-120347491	RAT_EDL_F,RAT_EDL_M,RAT_SOL_F,RAT_SOL_M
chr11:120347537-120347635	RAT_EDL_M,RAT_SOL_M
chr11:120383400-120384542	RAT_EDL_F,RAT_EDL_M,RAT_SOL_F
chr11:120384660-120385769	RAT_EDL_F,RAT_EDL_M,RAT_SOL_F
chr11:120385866-120389367	RAT_EDL_F,RAT_EDL_M,RAT_SOL_F
chr11:120389440-120404205	RAT_EDL_F,RAT_EDL_M,RAT_SOL_F
chr11:120404367-120408772	RAT_EDL_F,RAT_EDL_M,RAT_SOL_F
chr11:120408900-120409611	RAT_EDL_F,RAT_EDL_M,RAT_SOL_F
chr11:120409684-120411657	RAT_EDL_F,RAT_EDL_M,RAT_SOL_F
chr11:120411745-120413559	RAT_EDL_F,RAT_EDL_M,RAT_SOL_F
chr11:120416381-120418244	RAT_EDL_F,RAT_EDL_M,RAT_SOL_F
chr11:120418340-120419068	RAT_EDL_F,RAT_EDL_M,RAT_SOL_F
chr11:120419118-120421364	RAT_EDL_F,RAT_EDL_M,RAT_SOL_F
chr11:120421542-120428523	RAT_EDL_F,RAT_EDL_M,RAT_SOL_F
chr11:120428637-120433047	RAT_SOL_F
chr11:120465822-120465983	RAT_EDL_M
chr11:120469676-120470034	RAT_EDL_F,RAT_EDL_M,RAT_SOL_F
chr11:120470128-120471479	RAT_EDL_F,RAT_EDL_M,RAT_SOL_F
chr11:120471604-120472602	RAT_EDL_F,RAT_EDL_M,RAT_SOL_F
chr11:120485430-120485655	RAT_EDL_F,RAT_EDL_M,RAT_SOL_F
chr11:120550330-120550611	RAT_EDL_F,RAT_EDL_M,RAT_SOL_F
chr11:120561261-120562160	RAT_EDL_M,RAT_SOL_F
chr11:120562248-120562363	RAT_EDL_F,RAT_EDL_M,RAT_SOL_F
chr11:120562546-120562654	RAT_EDL_F,RAT_EDL_M,RAT_SOL_F
chr11:120562776-120563204	RAT_EDL_F,RAT_EDL_M,RAT_SOL_F
chr11:120563729-120563815	RAT_EDL_F,RAT_EDL_M,RAT_SOL_F
chr11:120563921-120567917	RAT_EDL_F,RAT_EDL_M,RAT_SOL_F
chr11:120568308-120571520	RAT_EDL_F,RAT_EDL_M,RAT_SOL_F
chr11:120579431-120579515	RAT_EDL_F,RAT_EDL_M,RAT_SOL_F
chr11:120580051-120580181	RAT_EDL_F,RAT_EDL_M,RAT_SOL_F
chr11:120595155-120595254	RAT_EDL_F,RAT_EDL_M,RAT_SOL_F
chr11:120599369-120605280	RAT_EDL_M
chr11:120610772-120610875	RAT_EDL_F,RAT_EDL_M,RAT_SOL_F
chr11:120610965-120611112	RAT_EDL_F,RAT_EDL_M,RAT_SOL_F
chr11:120611414-120611627	RAT_EDL_M
chr11:120704125-120708657	RAT_EDL_M,RAT_SOL_F
chr11:120708710-120708929	RAT_EDL_M,RAT_SOL_F
chr11:120717169-120717479	RAT_EDL_M,RAT_SOL_F
chr11:120717539-120717824	RAT_SOL_F
chr11:120718554-120718649	RAT_SOL_F
chr11:120725856-120725941	RAT_EDL_M
chr11:120789560-120789656	RAT_EDL_M
chr11:120789733-120789842	RAT_EDL_F,RAT_EDL_M,RAT_SOL_F
chr11:120789881-120791204	RAT_EDL_F,RAT_EDL_M,RAT_SOL_F
chr11:120793947-120794267	RAT_EDL_M,RAT_SOL_F
chr11:120902076-120903315	RAT_EDL_M
chr11:120953538-120953727	RAT_EDL_M
chr11:120954269-120955225	RAT_EDL_M
chr11:120955943-120956354	RAT_EDL_F,RAT_EDL_M
chr11:120957123-120957854	RAT_EDL_M
chr11:120969195-120971566	RAT_EDL_F,RAT_EDL_M,RAT_SOL_F
chr11:120971716-120972376	RAT_EDL_F,RAT_EDL_M,RAT_SOL_F
chr11:120972548-120972965	RAT_EDL_F,RAT_EDL_M,RAT_SOL_F
chr11:120973195-120973820	RAT_EDL_F,RAT_EDL_M,RAT_SOL_F
chr11:120973970-120983232	RAT_EDL_M,RAT_SOL_F
chr11:121224694-121225803	RAT_SOL_F
chr11:121237352-121238418	RAT_EDL_F,RAT_EDL_M,RAT_SOL_F
chr11:121242645-121244593	RAT_SOL_F
chr11:121245071-121245337	RAT_EDL_M,RAT_SOL_F
chr11:121247056-121249128	RAT_EDL_F,RAT_EDL_M,RAT_SOL_F
chr11:121249193-121250292	RAT_EDL_F,RAT_EDL_M,RAT_SOL_F
chr11:121288079-121290743	RAT_SOL_F
chr11:121290891-121296028	RAT_EDL_F,RAT_SOL_F
chr11:121328915-121329325	RAT_EDL_F,RAT_EDL_M,RAT_SOL_F
chr11:121337071-121338556	RAT_EDL_F,RAT_EDL_M,RAT_SOL_F
chr11:121338645-121341113	RAT_EDL_F,RAT_EDL_M,RAT_SOL_F
chr11:121341216-121349231	RAT_SOL_F
chr11:121358083-121358774	RAT_EDL_F,RAT_EDL_M
chr11:121358853-121359559	RAT_EDL_M
chr11:121439378-121440070	RAT_EDL_M
chr11:121459499-121460408	RAT_EDL_F,RAT_EDL_M,RAT_SOL_F
chr11:121460511-121461253	RAT_SOL_F
chr11:121461808-121475538	RAT_EDL_M,RAT_SOL_F
chr11:121475672-121492557	RAT_EDL_F,RAT_EDL_M,RAT_SOL_F
chr11:121556986-121560674	RAT_EDL_M,RAT_SOL_F
chr11:121560761-121573795	RAT_EDL_F,RAT_EDL_M,RAT_SOL_F
chr11:121573877-121575285	RAT_EDL_M,RAT_SOL_F
chr11:121596541-121597251	RAT_SOL_F
chr11:121603147-121603233	RAT_EDL_M
chr11:121605341-121608571	RAT_EDL_F,RAT_SOL_F
chr11:121608662-121609339	RAT_EDL_F,RAT_EDL_M,RAT_SOL_F
chr1:11231797-11265678	RAT_SOL_F
chr11:12343918-12369593	RAT_EDL_F,RAT_EDL_M,RAT_SOL_F
chr11:14675002-14675062	RAT_SOL_F
chr11:17054782-17078399	RAT_EDL_M
chr11:17182147-17192956	RAT_EDL_M
chr11:17193134-17194216	RAT_EDL_F,RAT_EDL_M,RAT_SOL_F
chr11:17194277-17194668	RAT_EDL_F,RAT_EDL_M,RAT_SOL_F
chr11:17194854-17198258	RAT_EDL_F,RAT_EDL_M,RAT_SOL_F
chr11:17204002-17204500	RAT_EDL_F,RAT_EDL_M,RAT_SOL_F
chr11:17208907-17209076	RAT_EDL_F,RAT_EDL_M,RAT_SOL_F
chr11:17209138-17209310	RAT_EDL_F,RAT_EDL_M,RAT_SOL_F
chr11:17209395-17210987	RAT_EDL_F,RAT_EDL_M,RAT_SOL_F
chr11:17227277-17228140	RAT_SOL_F
chr11:17262795-17263608	RAT_EDL_F,RAT_EDL_M,RAT_SOL_F
chr11:17263676-17263950	RAT_EDL_F,RAT_EDL_M,RAT_SOL_F
chr11:17264007-17266530	RAT_EDL_F,RAT_EDL_M,RAT_SOL_F
chr11:17947568-17947774	RAT_SOL_F
chr11:17947888-17952251	RAT_SOL_F
chr1:118301038-118304690	RAT_EDL_F,RAT_EDL_M,RAT_SOL_F
chr1:118304771-118305199	RAT_EDL_F,RAT_EDL_M,RAT_SOL_F
chr1:118323726-118327624	RAT_EDL_M
chr11:18327054-18327539	RAT_EDL_F,RAT_EDL_M,RAT_SOL_F,RAT_SOL_M
chr11:18327065-18327085	RAT_SOL_F
chr1:118327734-118329352	RAT_EDL_F,RAT_EDL_M,RAT_SOL_F
chr1:118459880-118461186	RAT_EDL_M
chr1:118461291-118462465	RAT_EDL_M,RAT_SOL_F
chr1:118462558-118464527	RAT_EDL_M,RAT_SOL_F
chr1:118464604-118467879	RAT_EDL_M,RAT_SOL_F
chr1:118467978-118471771	RAT_EDL_M,RAT_SOL_F
chr1:118471840-118497633	RAT_SOL_F
chr1:118499722-118501301	RAT_EDL_M,RAT_SOL_F
chr1:118501395-118502852	RAT_EDL_F,RAT_EDL_M,RAT_SOL_F
chr1:118502999-118503819	RAT_EDL_M,RAT_SOL_F
chr1:118503956-118504895	RAT_EDL_F,RAT_EDL_M,RAT_SOL_F
chr1:118504967-118505481	RAT_EDL_M,RAT_SOL_F
chr1:118505542-118506939	RAT_EDL_F,RAT_EDL_M,RAT_SOL_F
chr1:118507018-118508814	RAT_EDL_M,RAT_SOL_F
chr1:118508983-118509571	RAT_EDL_M
chr1:118543347-118545392	RAT_EDL_F,RAT_EDL_M,RAT_SOL_F
chr1:118545457-118547864	RAT_EDL_M,RAT_SOL_M
chr1:118548029-118551086	RAT_EDL_F,RAT_EDL_M,RAT_SOL_F
chr1:118551166-118552012	RAT_EDL_F,RAT_EDL_M,RAT_SOL_F
chr1:118560130-118561010	RAT_SOL_F
[truncated: 29,989 more rows]
