# Supplementary material for: Transcriptional profiling reveals extraordinary diversity among skeletal muscle tissues
Source: eLife journal article supplement (doi:10.7554/elife.34613), 2018-05-29
Supplement: supp [file elife-34613-supp-v1.zip › elife_poa_e34613_Supplementary_file_9.xlsx]

## Sheet: Sheet1
Gene	Disease
TRIO	Abnormal_Morphology
ACADVL	Abnormal_Morphology
FGF10	Abnormal_Morphology
MYOZ1	Abnormal_Morphology
LMNB2	Abnormal_Morphology
PPP3CB	Abnormal_Morphology
UCHL3	Abnormal_Morphology
IFRD1	Abnormal_Morphology
SLC2A4	Abnormal_Morphology
RPS6KB1	Abnormal_Morphology
HLX	Abnormal_Morphology
CFL2	Abnormal_Morphology
LMO7	Abnormal_Morphology
EYA1	Abnormal_Morphology
MEOX1	Abnormal_Morphology
MYCBP2	Abnormal_Morphology
NGFR	Abnormal_Morphology
FBN1	Abnormal_Morphology
HEYL	Abnormal_Morphology
VDAC3	Abnormal_Morphology
PPP3CA	Abnormal_Morphology
HADHA	Abnormal_Morphology
CDKN1C	Abnormal_Morphology
HEY1	Abnormal_Morphology
NTF3	Abnormal_Morphology
FST	Abnormal_Morphology
MYOF	Abnormal_Morphology
BCL2	Abnormal_Morphology
MYLPF	Abnormal_Morphology
MYH1	Abnormal_Morphology
PITX2	Abnormal_Morphology
SNAP25	Abnormal_Morphology
NEURL2	Abnormal_Morphology
DOCK1	Abnormal_Morphology
CDKN1A	Abnormal_Morphology
SERP1	Abnormal_Morphology
WFIKKN1	Abnormal_Morphology
WFIKKN2	Abnormal_Morphology
SYPL2	Abnormal_Morphology
CLIP3	Abnormal_Morphology
FGFRL1	Abnormal_Morphology
ADAM19	Abnormal_Morphology
ADIPOQ	Abnormal_Morphology
LMNB1	Abnormal_Morphology
SSPN	Abnormal_Morphology
DNASE2	Abnormal_Morphology
ATP2A1	Abnormal_Morphology
SKI	Abnormal_Morphology
SOD2	Abnormal_Morphology
DLX5	Abnormal_Morphology
CAV1	Abnormal_Morphology
RPS6KB2	Abnormal_Morphology
ILF3	Abnormal_Morphology
MYT1	Abnormal_Morphology
HOXA2	Abnormal_Morphology
NFATC3	Abnormal_Morphology
TBX1	Abnormal_Morphology
ADCYAP1	Abnormal_Morphology
BACE1	Abnormal_Morphology
SMTNL1	Abnormal_Morphology
BAX	Abnormal_Morphology
LRRC8A	Abnormal_Morphology
DLX2	Abnormal_Morphology
TCF15	Abnormal_Morphology
CHRNG	Abnormal_Morphology
CACNB1	Abnormal_Morphology
SGCG	Abnormal_Morphology,Dystrophy
DES	Abnormal_Morphology,Dystrophy
MB	Abnormal_Morphology,Dystrophy
ACTA1	Abnormal_Morphology,Dystrophy
LPL	Abnormal_Morphology,Dystrophy
EMD	Abnormal_Morphology,Dystrophy
CAV2	Abnormal_Morphology,Dystrophy
LOX	Abnormal_Morphology,Dystrophy
COL12A1	Abnormal_Morphology,Dystrophy
TNFSF11	Atrophy
NOV	Atrophy
MARS	Atrophy
FIG4	Atrophy
CFLAR	Atrophy
CHCHD10	Atrophy
NEFH	Atrophy
GDAP1	Atrophy
PSAP	Atrophy
JPH1	Atrophy
ASCC1	Atrophy
NEFL	Atrophy
PRPS1	Atrophy
DCTN2	Atrophy
DST	Atrophy
GNRH1	Atrophy
HSPB3	Atrophy
IGF1	Atrophy
SLC34A1	Atrophy
EGR2	Atrophy
EP300	Atrophy
SBF1	Atrophy
BICD2	Atrophy
AKT1	Atrophy
NDRG1	Atrophy
INF2	Atrophy
GJC1	Atrophy
GDF11	Atrophy
HK1	Atrophy
DNAJB2	Atrophy
DYNC1H1	Atrophy
HOXB2	Atrophy
HEXB	Atrophy
JUP	Atrophy
MAP2K3	Atrophy
BRCA1	Atrophy
MKL1	Atrophy
DICER1	Atrophy
RAE1	Atrophy
KIF1B	Atrophy
MYD88	Atrophy
KARS	Atrophy
GARS	Atrophy
TRIM2	Atrophy
ARHGEF10	Atrophy
MORC2	Atrophy
AMY2B	Atrophy
PHEX	Atrophy
BDNF	Atrophy
HDAC4	Atrophy
CD86	Atrophy
KL	Atrophy
LITAF	Atrophy
AIFM1	Atrophy
AMY2A	Atrophy
MFN2	Atrophy
GJB1	Atrophy
DCTN1	Atrophy
USP19	Atrophy
BSCL2	Atrophy
GDNF	Atrophy
TARDBP	Atrophy
HDAC6	Atrophy
PDK3	Atrophy
SOD1	Atrophy
UBA1	Atrophy
CBLB	Atrophy
BUB1B	Atrophy
SLC5A7	Atrophy
SIGMAR1	Atrophy
ATP7A	Atrophy
CASP3	Atrophy
AGTRAP	Atrophy
NOS1	Atrophy
SBF2	Atrophy
IKBKB	Atrophy
RAB7A	Atrophy
HSPB8	Atrophy
SPG11	Atrophy
TRIP4	Atrophy
KCNH2	Atrophy
GADD45A	Atrophy
VAPB	Atrophy
ACVR2B	Atrophy
DHTKD1	Atrophy
GNB4	Atrophy
GATM	Atrophy
LRSAM1	Atrophy
MME	Atrophy
TTPA	Atrophy
PPARGC1B	Atrophy
TRAF6	Atrophy
FOXO1	Atrophy
MTMR2	Atrophy
FGD4	Atrophy
HSPB1	Atrophy
REEP1	Atrophy
ARHGAP1	Atrophy
VCP	Atrophy
SETX	Atrophy
EPG5	Atrophy
AKT2	Atrophy
BUB3	Atrophy
CNTF	Atrophy
PRX	Atrophy
MPZ	Atrophy
GAN	Atrophy
MAMSTR	Atrophy
ZBTB20	Atrophy
SLC6A6	Atrophy
SH3TC2	Atrophy
AR	Atrophy
SURF1	Atrophy
GEMIN2	Atrophy
PMP22	Atrophy
TRPV4	Atrophy
C1QB	Atrophy
ASAH1	Atrophy
ACHE	Atrophy
FBXO38	Atrophy
YARS	Atrophy
COX6A1	Atrophy
HTT	Atrophy
PARL	Atrophy
SLC25A46	Atrophy
ID1	Atrophy
CYP11A1	Atrophy
IGHMBP2	Atrophy
SLC52A3	Atrophy
IGFALS	Atrophy
BCL2L1	Atrophy
PLEKHG5	Atrophy
AARS	Atrophy
TBCE	Atrophy
MED25	Atrophy
EPO	Atrophy
MAP3K4	Atrophy
HINT1	Atrophy
ATF3	Atrophy
GJA1	Atrophy
NAGLU	Atrophy
NFKBIA	Atrophy
HDAC5	Atrophy
MYH4	Atrophy,Abnormal_Morphology
ECEL1	Atrophy,Abnormal_Morphology
MYOG	Atrophy,Abnormal_Morphology
IL6	Atrophy,Abnormal_Morphology
PAX7	Atrophy,Abnormal_Morphology
MMP2	Atrophy,Abnormal_Morphology
CAV3	Atrophy,Abnormal_Morphology
PPARGC1A	Atrophy,Abnormal_Morphology
MET	Atrophy,Abnormal_Morphology
MSTN	Atrophy,Abnormal_Morphology
GAA	Atrophy,Abnormal_Morphology
ACTN3	Atrophy,Abnormal_Morphology
CHRNE	Atrophy,Abnormal_Morphology
CHAT	Atrophy,Abnormal_Morphology
VEGFA	Atrophy,Dystrophy
SPEG	Centronuclear Dystrophy
BIN1	Centronuclear Dystrophy
PFKM	Centronuclear Dystrophy,Abnormal_Morphology
MYF6	Centronuclear Dystrophy,Abnormal_Morphology
MEOX2	Centronuclear Dystrophy,Abnormal_Morphology
MYF5	Centronuclear Dystrophy,Abnormal_Morphology
PLEC	Centronuclear Dystrophy,Abnormal_Morphology
SGCA	Centronuclear Dystrophy,Abnormal_Morphology
COL6A1	Centronuclear Dystrophy,Abnormal_Morphology
SYNE1	Centronuclear Dystrophy,Abnormal_Morphology
TLN2	Centronuclear Dystrophy,Abnormal_Morphology
APOBEC2	Centronuclear Dystrophy,Abnormal_Morphology
MYOD1	Centronuclear Dystrophy,Abnormal_Morphology
NRG1	Centronuclear Dystrophy,Abnormal_Morphology
MBNL1	Centronuclear Dystrophy,Abnormal_Morphology
KEL	Centronuclear Dystrophy,Abnormal_Morphology
XK	Centronuclear Dystrophy,Abnormal_Morphology
FLNC	Centronuclear Dystrophy,Abnormal_Morphology
PTPRS	Centronuclear Dystrophy,Abnormal_Morphology
TRIM72	Centronuclear Dystrophy,Abnormal_Morphology
PTPRD	Centronuclear Dystrophy,Abnormal_Morphology
SRPK3	Centronuclear Dystrophy,Abnormal_Morphology
MMP14	Centronuclear Dystrophy,Abnormal_Morphology
ALS2	Centronuclear Dystrophy,Atrophy
HSD11B1	Centronuclear Dystrophy,Atrophy
DNM2	Centronuclear Dystrophy,Atrophy
H6PD	Centronuclear Dystrophy,Atrophy
MTMR14	Centronuclear Dystrophy,Atrophy
ITGA7	Centronuclear Dystrophy,AtrophyDystrophy,
TTN	Centronuclear Dystrophy,AtrophyDystrophy,
SCYL1	Centronuclear Dystrophy,AtrophyDystrophy,
TNNT1	Centronuclear Dystrophy,AtrophyDystrophy,
MTM1	Centronuclear Dystrophy,MyopathyAbnormal_Morphology,
TMEM5	Dystrophy
ADRA1A	Dystrophy
DAB2	Dystrophy
LOXL2	Dystrophy
LDB3	Dystrophy
ISPD	Dystrophy
MYH8	Dystrophy
CHKB	Dystrophy
PABPN1	Dystrophy
SDC2	Dystrophy
CSRP2	Dystrophy
OXCT1	Dystrophy
COL6A3	Dystrophy
SYNE2	Dystrophy
ASPN	Dystrophy
BMP1	Dystrophy
TNNT2	Dystrophy
MYL1	Dystrophy
PITX1	Dystrophy
POMT2	Dystrophy
CXCL14	Dystrophy
CAB39L	Dystrophy
CYB561	Dystrophy
CPQ	Dystrophy
SGCD	Dystrophy
COL5A2	Dystrophy
HIF1A	Dystrophy
MYL4	Dystrophy
COLGALT2	Dystrophy
MAML1	Dystrophy
G0S2	Dystrophy
TAX1BP3	Dystrophy
F2R	Dystrophy
NF1	Dystrophy
ACLY	Dystrophy
BVES	Dystrophy
B3GALNT2	Dystrophy
TCAP	Dystrophy
TBCD	Dystrophy
COL6A2	Dystrophy
HOMER1	Dystrophy
S1PR1	Dystrophy
CNBP	Dystrophy
GSS	Dystrophy
S100A11	Dystrophy
HLA-A	Dystrophy
CTSS	Dystrophy
CELF2	Dystrophy
DTNA	Dystrophy
COLEC12	Dystrophy
POMGNT2	Dystrophy
KDELR2	Dystrophy
COL4A2	Dystrophy
TMOD4	Dystrophy
COL4A1	Dystrophy
TGFBR2	Dystrophy
CCND3	Dystrophy
MYL2	Dystrophy
PLS3	Dystrophy
COL1A2	Dystrophy
IDI2	Dystrophy
RASSF1	Dystrophy
MYL3	Dystrophy
DNAJB6	Dystrophy
LBP	Dystrophy
DAG1	Dystrophy
GMPPB	Dystrophy
AHNAK	Dystrophy
EXTL1	Dystrophy
TRAPPC11	Dystrophy
TAF13	Dystrophy
PLOD2	Dystrophy
HNRNPDL	Dystrophy
CAP1	Dystrophy
PGRMC1	Dystrophy
ACTA2	Dystrophy
PLCB1	Dystrophy
POMK	Dystrophy
PFN2	Dystrophy
CNN3	Dystrophy
TNPO3	Dystrophy
TMEM43	Dystrophy
TGFBR3	Dystrophy
TECRL	Dystrophy
ENG	Dystrophy
CAST	Dystrophy
FXR1	Dystrophy
HLA-DQA1	Dystrophy
UCP3	Dystrophy
ZMPSTE24	Dystrophy
INPP5A	Dystrophy
NEDD4	Dystrophy
PDE11A	Dystrophy
HLA-C	Dystrophy
ADRB2	Dystrophy
TPM4	Dystrophy
POMT1	Dystrophy
ABLIM1	Dystrophy
MYOT	Dystrophy
PDE5A	Dystrophy
ITGB1	Dystrophy
CALD1	Dystrophy
RSU1	Dystrophy
PDK4	Dystrophy
TPM3	Dystrophy
LTBP3	Dystrophy
HLA-DQB1	Dystrophy
JAG1	Dystrophy
COL1A1	Dystrophy
SDC3	Dystrophy
TNNT3	Dystrophy
CSRP3	Dystrophy
HLA-DRB1	Dystrophy
ADRB1	Dystrophy
TMOD1	Dystrophy
DMPK	Dystrophy
EMILIN1	Dystrophy
CYCS	Dystrophy
ADRA1D	Dystrophy
LIMS2	Dystrophy
NGF	Dystrophy
SLC25A33	Dystrophy
ADRB3	Dystrophy
HPGDS	Dystrophy
TGFBI	Dystrophy
TIA1	Dystrophy
SMCHD1	Dystrophy
BGN	Dystrophy
CFL1	Dystrophy
SPARC	Dystrophy
FKRP	Dystrophy
SERPINH1	Dystrophy
LOXL1	Dystrophy
ANO5	Dystrophy
POMGNT1	Dystrophy
SDCBP	Dystrophy
SLC7A11	Dystrophy
COL5A1	Dystrophy
SAMHD1	Dystrophy
FGF1	Dystrophy
FHL1	Dystrophy
FKTN	Dystrophy
DPAGT1	Dystrophy
TRIM32	Dystrophy
MYH7	Dystrophy
FN1	Dystrophy
TIMP3	Dystrophy
COL3A1	Dystrophy
ACE	Dystrophy
MYBPC1	Inflammation
STAT6	Inflammation
IRAK4	Inflammation
ITGB3	Inflammation
CD55	Inflammation
CXCL12	Inflammation
HGF	Inflammation
TLR2	Inflammation
SOCS1	Inflammation
IL1A	Inflammation
IFNGR2	Inflammation
ACVR1	Inflammation
MYBPC2	Inflammation
MB21D1	Inflammation
HPRT1	Inflammation
IL17RA	Inflammation
TREX1	Inflammation
MAVS	Inflammation
TNFSF13B	Inflammation
RELB	Inflammation
TNNI3	Inflammation
APOA1	Inflammation
PPAT	Inflammation
RYR2	Inflammation
LAMA2	Inflammation,Abnormal_Morphology
CCL2	Inflammation,Abnormal_Morphology
COL13A1	Inflammation,Abnormal_Morphology
ADAM12	Inflammation,Abnormal_Morphology
DMD	Inflammation,Abnormal_Morphology
TGFB1	Inflammation,Abnormal_Morphology
SYT7	Inflammation,Abnormal_Morphology
FBXO32	Inflammation,Atrophy
TP53	Inflammation,Atrophy
IL1B	Inflammation,Atrophy
AGT	Inflammation,Atrophy
HARS	Inflammation,Atrophy
CEBPB	Inflammation,Atrophy
TLR4	Inflammation,Atrophy
NR3C1	Inflammation,Atrophy
DYSF	Inflammation,Centronuclear DystrophyAbnormal_Morphology,Dystrophy
SGCB	Inflammation,Centronuclear DystrophyAbnormal_Morphology,Dystrophy
UTRN	Inflammation,Dystrophy
CAPN3	Inflammation,Dystrophy
DUSP1	Inflammation,Myopathy
PPARA	Myopathy
TRIM54	Myopathy
HDAC1	Myopathy
HDAC2	Myopathy
BNIP3L	Myopathy,Atrophy
FOXO3	Myopathy,Atrophy
SIRT1	Myopathy,Atrophy
DDX5	Myopathy,Atrophy
ZNF106	Myopathy,Atrophy
PRSS12	Myopathy,Atrophy
TRIM63	Myopathy,Atrophy
RELA	Myopathy,Atrophy
BNIP3	Myopathy,Atrophy
FIS1	Myopathy,Atrophy
DNM1L	Myopathy,Atrophy
SQSTM1	Myopathy,Atrophy
LMNA	Myopathy,Atrophy
KAT2A	Myopathy,Atrophy
COL25A1	Skeletal Muscle Paralysis,Centronuclear DystrophyAbnormal_Morphology,
RYR1	Skeletal Muscle Paralysis,Centronuclear DystrophyAbnormal_Morphology,Dystrophy
GOLPH3	Skeletal Muscle Paralysis,Myopathy
KIF21A	Skeletal Muscle Paralysis,Myopathy
SLC1A3	Skeletal Muscle Paralysis,Myopathy
TGM1	Skeletal Muscle Paralysis,Myopathy
MYH2	Skeletal Muscle Paralysis,Myopathy
TUBG2	Skeletal Muscle Paralysis,Myopathy
POLG2	Skeletal Muscle Paralysis,Myopathy
DNA2	Skeletal Muscle Paralysis,Myopathy
RNASEH1	Skeletal Muscle Paralysis,Myopathy
SERPINA3	Skeletal Muscle Paralysis,Myopathy
MAPT	Skeletal Muscle Paralysis,Myopathy
SCN10A	Skeletal Muscle Paralysis,Myopathy
DDB2	Skeletal Muscle Paralysis,Myopathy
SCN11A	Skeletal Muscle Paralysis,Myopathy
NR4A2	Skeletal Muscle Paralysis,Myopathy
TGM2	Skeletal Muscle Paralysis,Myopathy
SLC1A7	Skeletal Muscle Paralysis,Myopathy
DGUOK	Skeletal Muscle Paralysis,Myopathy
SCN5A	Skeletal Muscle Paralysis,Myopathy
TUBA8	Skeletal Muscle Paralysis,Myopathy
PTBP2	Skeletal Muscle Paralysis,Myopathy
TUBB4A	Skeletal Muscle Paralysis,Myopathy
POLG	Skeletal Muscle Paralysis,Myopathy
SCN4B	Skeletal Muscle Paralysis,Myopathy
SLC1A2	Skeletal Muscle Paralysis,Myopathy
SLC1A1	Skeletal Muscle Paralysis,Myopathy
SCN2B	Skeletal Muscle Paralysis,Myopathy
SCN1B	Skeletal Muscle Paralysis,Myopathy
TUBB3	Skeletal Muscle Paralysis,Myopathy
TUBA4A	Skeletal Muscle Paralysis,Myopathy
SLC25A4	Skeletal Muscle Paralysis,Myopathy
SCN3A	Skeletal Muscle Paralysis,Myopathy
STUB1	Skeletal Muscle Paralysis,Myopathy
TK2	Skeletal Muscle Paralysis,Myopathy
SCN9A	Skeletal Muscle Paralysis,Myopathy
SCN7A	Skeletal Muscle Paralysis,Myopathy
TUBB1	Skeletal Muscle Paralysis,Myopathy
TUBB4B	Skeletal Muscle Paralysis,Myopathy
SCN3B	Skeletal Muscle Paralysis,Myopathy
TUBA1C	Skeletal Muscle Paralysis,Myopathy
TUBA1A	Skeletal Muscle Paralysis,Myopathy
TUBE1	Skeletal Muscle Paralysis,Myopathy
TUBD1	Skeletal Muscle Paralysis,Myopathy
SLC1A4	Skeletal Muscle Paralysis,Myopathy
SCN4A	Skeletal Muscle Paralysis,Myopathy
TUBG1	Skeletal Muscle Paralysis,Myopathy
RRM2B	Skeletal Muscle Paralysis,Myopathy
TUBB2A	Skeletal Muscle Paralysis,Myopathy
SLC6A3	Skeletal Muscle Paralysis,Myopathy
SCN8A	Skeletal Muscle Paralysis,Myopathy
