# Supplementary material for: Transcriptional profiling reveals extraordinary diversity among skeletal muscle tissues
Source: eLife journal article supplement (doi:10.7554/elife.34613), 2018-05-29
Supplement: supp [file elife-34613-supp-v1.zip › elife_poa_e34613_Supplementary_file_10.xlsx]

## Sheet: Sheet1
gene	transcript	q-value	Maximum expression	Tissue of maximal expression
Aimp1	uc008rjx	3.36e-15	94.52	tibialis anterior
Areg	uc008ybt	6.81e-18	1.18	eye
Bmp1	uc007uoc	1.54e-17	19.26	eye
Bmp10	uc012eol	2.22e-13	1.2	tongue
Bmp2	uc008mnr	1.41e-15	2.14	FDB
Bmp3	uc008ygh	5.09e-12	1.26	eye
Bmp4	uc011zjm	3.68e-20	6.15	diaphragm
Bmp5	uc009qsu	3.04e-23	11.33	FDB
Bmp6	uc007qdp	3.46e-12	6.85	eye
Bmp7	uc008odc	3.44e-05	5.44	tongue
Bmp8a	uc012dks	4.83e-11	8.24	tongue
Bmp8b	uc008uot	0.0361	4.95	tongue
C1qtnf4	uc008ktq	0.000327	24.21	tongue
Ccl11	uc007kmr	1.46e-14	39.92	eye
Ccl12	uc007kms	0.0035	23.24	tongue
Ccl17	uc009mwz	3.18e-05	13.55	tongue
Ccl2	uc007kmp	2.49e-08	3.5	FDB
Ccl20	uc007bsm	6.6e-06	8.43	tongue
Ccl22	uc009mww	8.3e-05	2.98	masseter
Ccl24	uc008zyn	1.04e-14	9	tongue
Ccl25	uc009ktw	2.49e-18	6.05	quadriceps
Ccl27a	uc008sju	6.46e-10	4.92	diaphragm
Ccl28	uc007sal	6.7e-13	3.61	tongue
Ccl3	uc007kpn	0.0203	17.57	tongue
Ccl5	uc007kpi	0.26	8.83	masseter
Ccl6	uc007kpm	1.7e-14	22.46	tongue
Ccl7	uc007kmq	3.21e-06	2.72	tongue
Ccl8	uc007kmt	1.24e-07	29.63	masseter
Ccl9	uc007kpj	3.61e-12	7.92	FDB
Cd40lg	uc009thb	0.082	4.92	tongue
Cklf	uc009nad	2.8e-05	2.21	tongue
Clcf1	uc008fzj	4.84e-07	59.78	tongue
Cmtm3	uc009nam	1.28e-15	10.74	eye
Cmtm4	uc009nan	5.65e-09	5.59	eye
Cmtm5	uc007txq	8.67e-05	4.73	eye
Cmtm6	uc009ryb	2.6e-18	11.21	eye
Cmtm7	uc009ryc	2.05e-10	8.85	tongue
Cmtm8	uc009ryg	1.1e-22	7.36	soleus
Cntf	uc008gun	4.19e-16	17.77	eye
Crlf1	uc009mak	1.05e-11	5.58	tongue
Csf1	uc008qxl	1.84e-19	17.13	tongue
Cx3cl1	uc009mwx	2.26e-17	2.35	eye
Cxcl10	uc008ycz	3.45e-05	1.09	masseter
Cxcl11	uc029vjk	1.25e-16	64.41	tongue
Cxcl12	uc009dku	9.39e-31	64.45	diaphragm
Cxcl13	uc008yfb	1.59e-08	19.78	masseter
Cxcl14	uc011zab	2.67e-23	34.93	FDB
Cxcl16	uc011xxt	9.67e-14	4.31	tongue
Cxcl3	uc008ybj	4.63e-17	9.57	tongue
Cxcl5	uc008ybg	1.42e-10	1.07	tongue
Cxcl9	uc008ycv	1.59e-17	42.87	tongue
Ebi3	uc008daj	0.00877	1.04	tongue
Edn1	uc007qfl	1.64e-23	4.55	eye
Fam3b	uc008adj	2.33e-15	1.9	tongue
Fgf2	uc008paq	4.2e-10	7.17	tongue
Flt3l	uc009gto	2.23e-14	7.51	eye
Gdf10	uc007tab	1.03e-14	5.56	eye
Gdf11	uc007hot	5.13e-27	27.71	tongue
Gdf15	uc009mba	1.83e-08	1.6	tongue
Gdf2	uc007tac	7.09e-15	1.42	tongue
Gdf5	uc012chg	0.000127	1.71	tongue
Gdf7	uc007mzl	0.471	6.15	tongue
Gdf9	uc007iwa	4.95e-05	8.09	tongue
Gpi1	uc009gix	7.32e-06	162.22	EDL
Gpi1	uc012fie	7.57e-07	130.74	EDL
Grem2	uc007dtf	3.61e-28	9.6	gastrocnemius
Grn	uc007lrv	3.62e-15	29.19	eye
Hmgb1	uc009apd	0.0117	7.51	quadriceps
Ifne	uc008tod	0.471	14.81	tongue
Il10	uc007cmu	0.221	55.17	tongue
Il12a	uc008plu	2.62e-30	28.94	tongue
Il12b	uc007inc	0.0154	4.45	tongue
Il15	uc009mjj	1.26e-17	20.65	diaphragm
Il16	uc009idr	1.06e-10	6.19	masseter
Il17b	uc008fck	2.22e-05	3.45	tongue
Il17c	uc012gmc	0.0113	2.97	tongue
Il18	uc009pju	4.38e-14	8.14	tongue
Il1a	uc008mhr	3.08e-10	1.85	tongue
Il1b	uc008mht	0.000855	1.69	tongue
Il1f10	uc008iou	1.74e-59	5.78	tongue
Il1f5	uc008ios	2.23e-20	21.05	tongue
Il1f6	uc008ioq	6.99e-23	18.82	tongue
Il1f6	uc008ior	2.13e-22	30.65	tongue
Il1f8	uc008ion	2.6e-26	2.57	tongue
Il1f9	uc008ioo	2.33e-10	6.91	tongue
Il20	uc011wrm	2.43e-14	9.81	eye
Il23a	uc007hmc	0.306	20.17	tongue
Il24	uc007cmo	0.723	6.83	tongue
Il25	uc007txn	0.421	22.77	tongue
Il33	uc008hec	6.13e-20	21.61	eye
Il34	uc009nla	3.42e-11	4.28	tongue
Il5	uc007iwv	5.16e-10	1.06	tongue
Il7	uc008ook	1.21e-13	3.3	tongue
Inhba	uc007pnw	6.91e-05	1.34	FDB
Kitl	uc007gxs	8.16e-09	24.13	eye
Lefty1	uc007dww	0.000193	5.14	tongue
Lefty2	uc007dwu	8.58e-05	4.74	tongue
Lta	uc008cgu	2.94e-05	1.8	masseter
Ltb	uc008cgp	0.000128	6.81	masseter
Mif	uc007ftc	5.33e-11	16.39	eye
Mstn	uc007ayt	4.34e-31	78.31	gastrocnemius
Nampt	uc007nif	1.52e-14	107.45	quadriceps
Ndp	uc009ssc	2.57e-05	14.82	tongue
Nodal	uc007ffy	5.65e-07	16.82	tongue
Nog	uc007kwh	3.73e-08	3.39	tongue
Osm	uc007hus	0.00301	1.89	tongue
Pf4	uc008ybi	4.28e-20	28.8	FDB
Pglyrp1	uc009fjv	8.66e-11	28.3	tongue
Scgb3a1	uc007iqv	0.000813	5.43	tongue
Slurp1	uc007wft	3.22e-16	14.73	tongue
Spp1	uc008yki	5.69e-12	28.13	FDB
Thpo	uc007yra	1.23e-12	5.81	soleus
Timp1	uc009stz	4.54e-07	9.82	soleus
Tnf	uc012arb	0.798	2.07	tongue
Tnfsf10	uc008otm	4.28e-19	20.48	tongue
Tnfsf13	uc007jre	5.83e-17	10.65	tongue
Tnfsf13b	uc009kun	0.0537	4.15	tongue
Tnfsf9	uc008ded	2.62e-08	10.48	tongue
Tslp	uc008ejl	3.08e-11	105.21	tongue
Vegfa	uc008crq	1.87e-25	225.26	diaphragm
Wnt5a	uc007suh	1.35e-15	6.01	tongue
Wnt7a	uc009cxz	0.723	2.49	tongue
