# Supplementary figures and images for: Transcriptional profiling reveals extraordinary diversity among skeletal muscle tissues
Source: eLife journal article supplement (doi:10.7554/elife.34613), 2018-05-29

Figure 1-figure supplement 7:

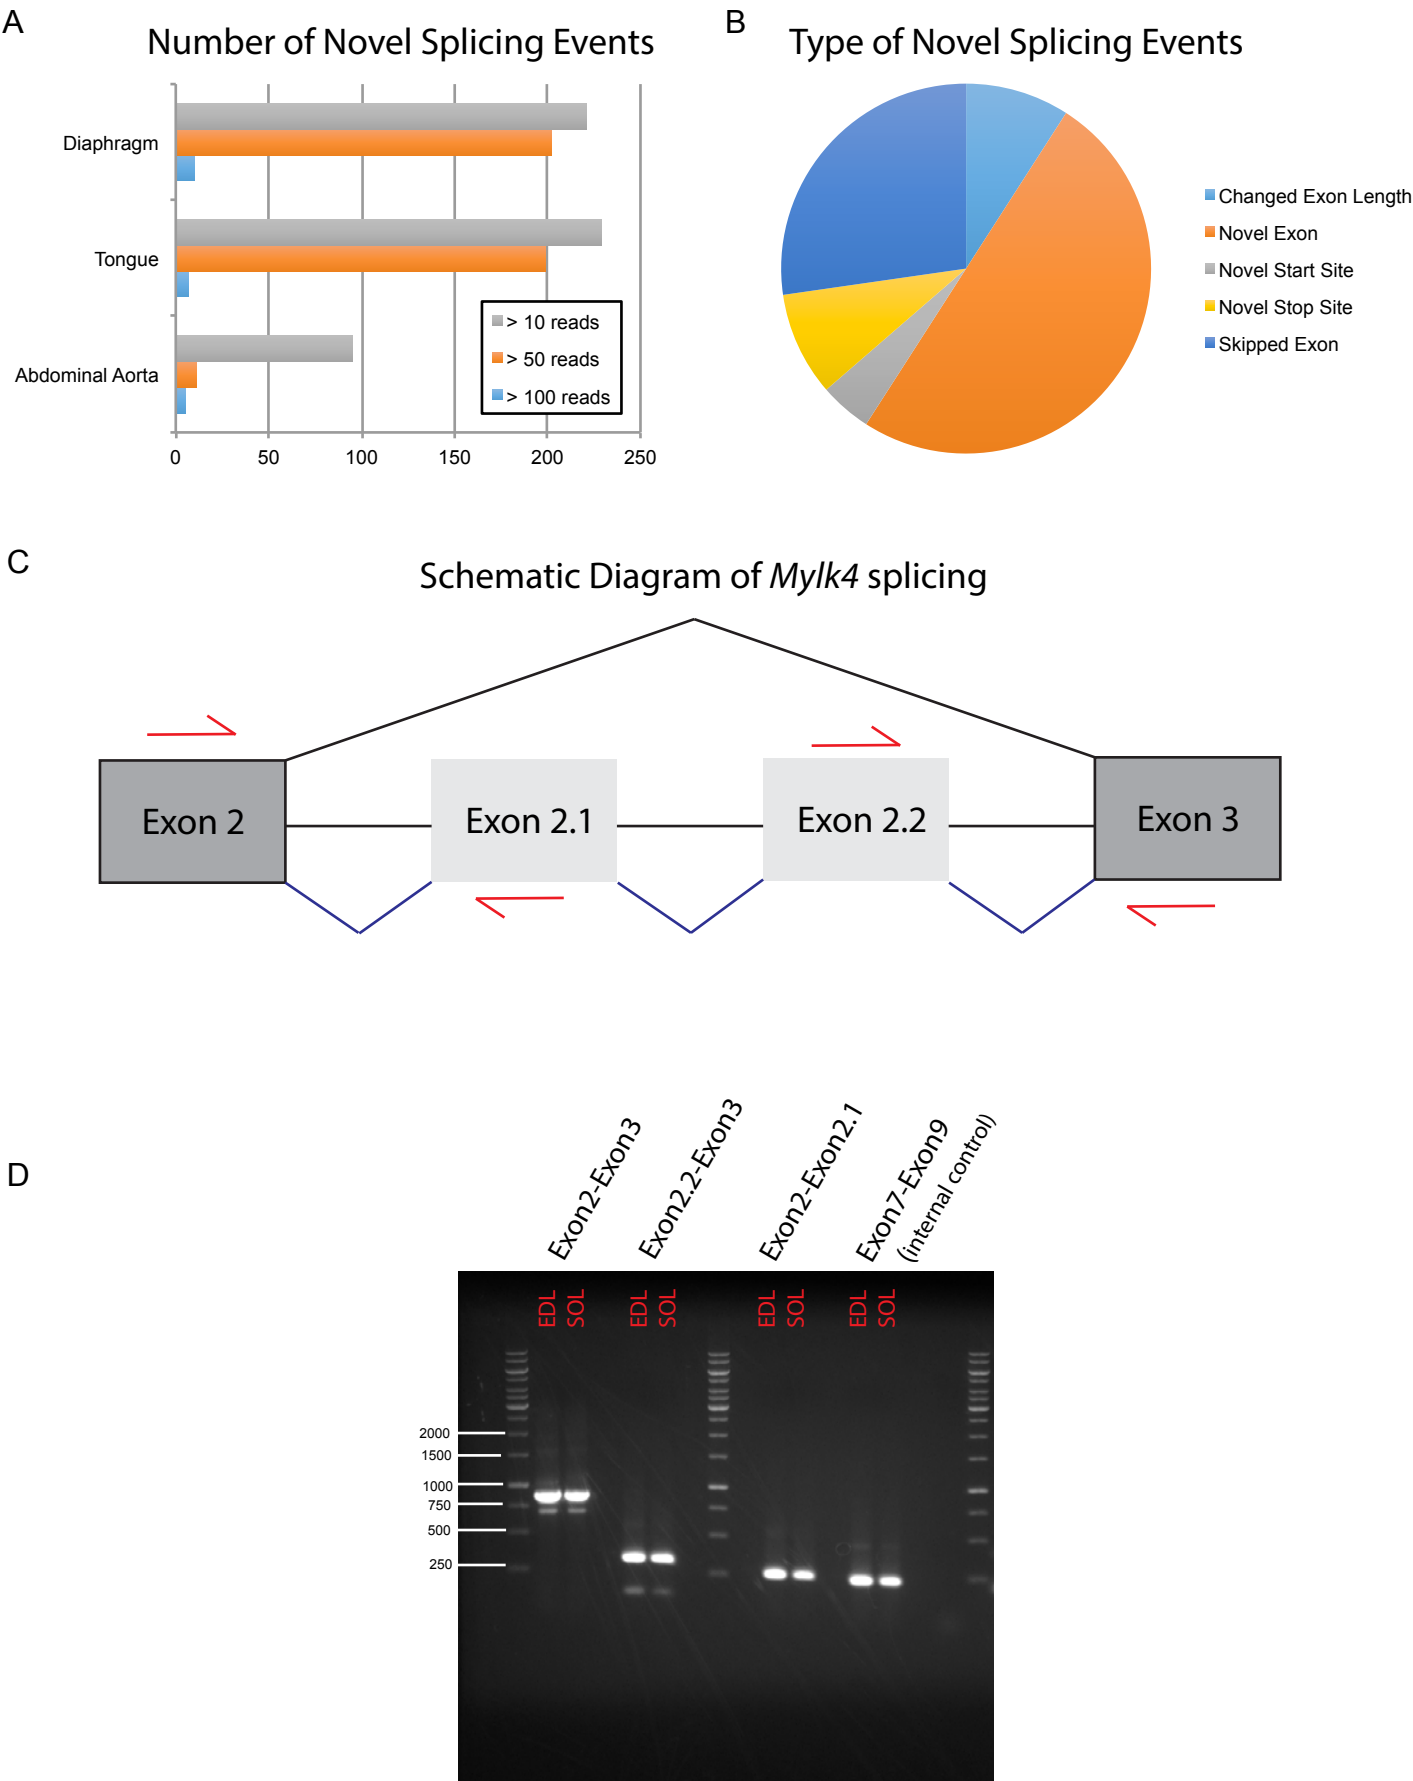

Supplement: supp [file elife-34613-supp-v1.zip]

Figure 1-figure supplement 1:

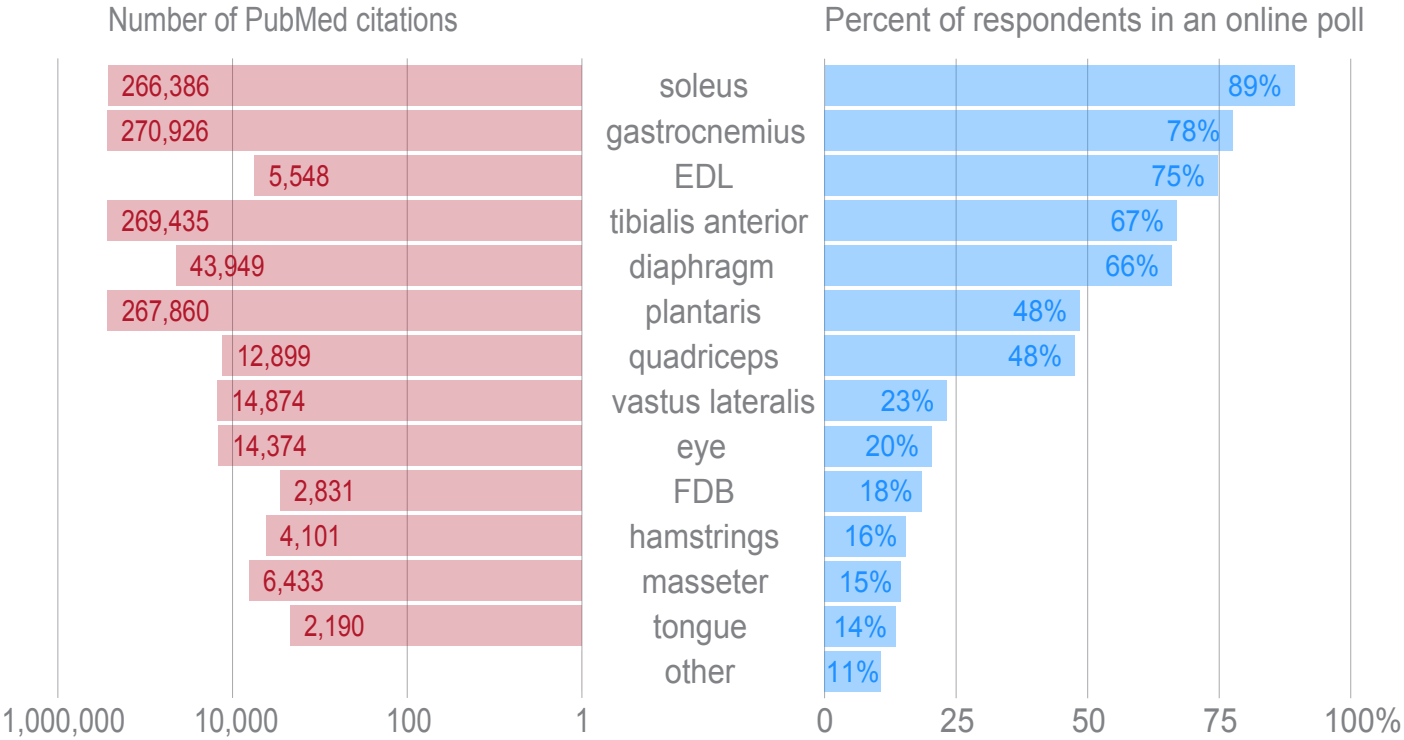

Supplement: supp [file elife-34613-supp-v1.zip]

Figure 7-figure supplement 2:

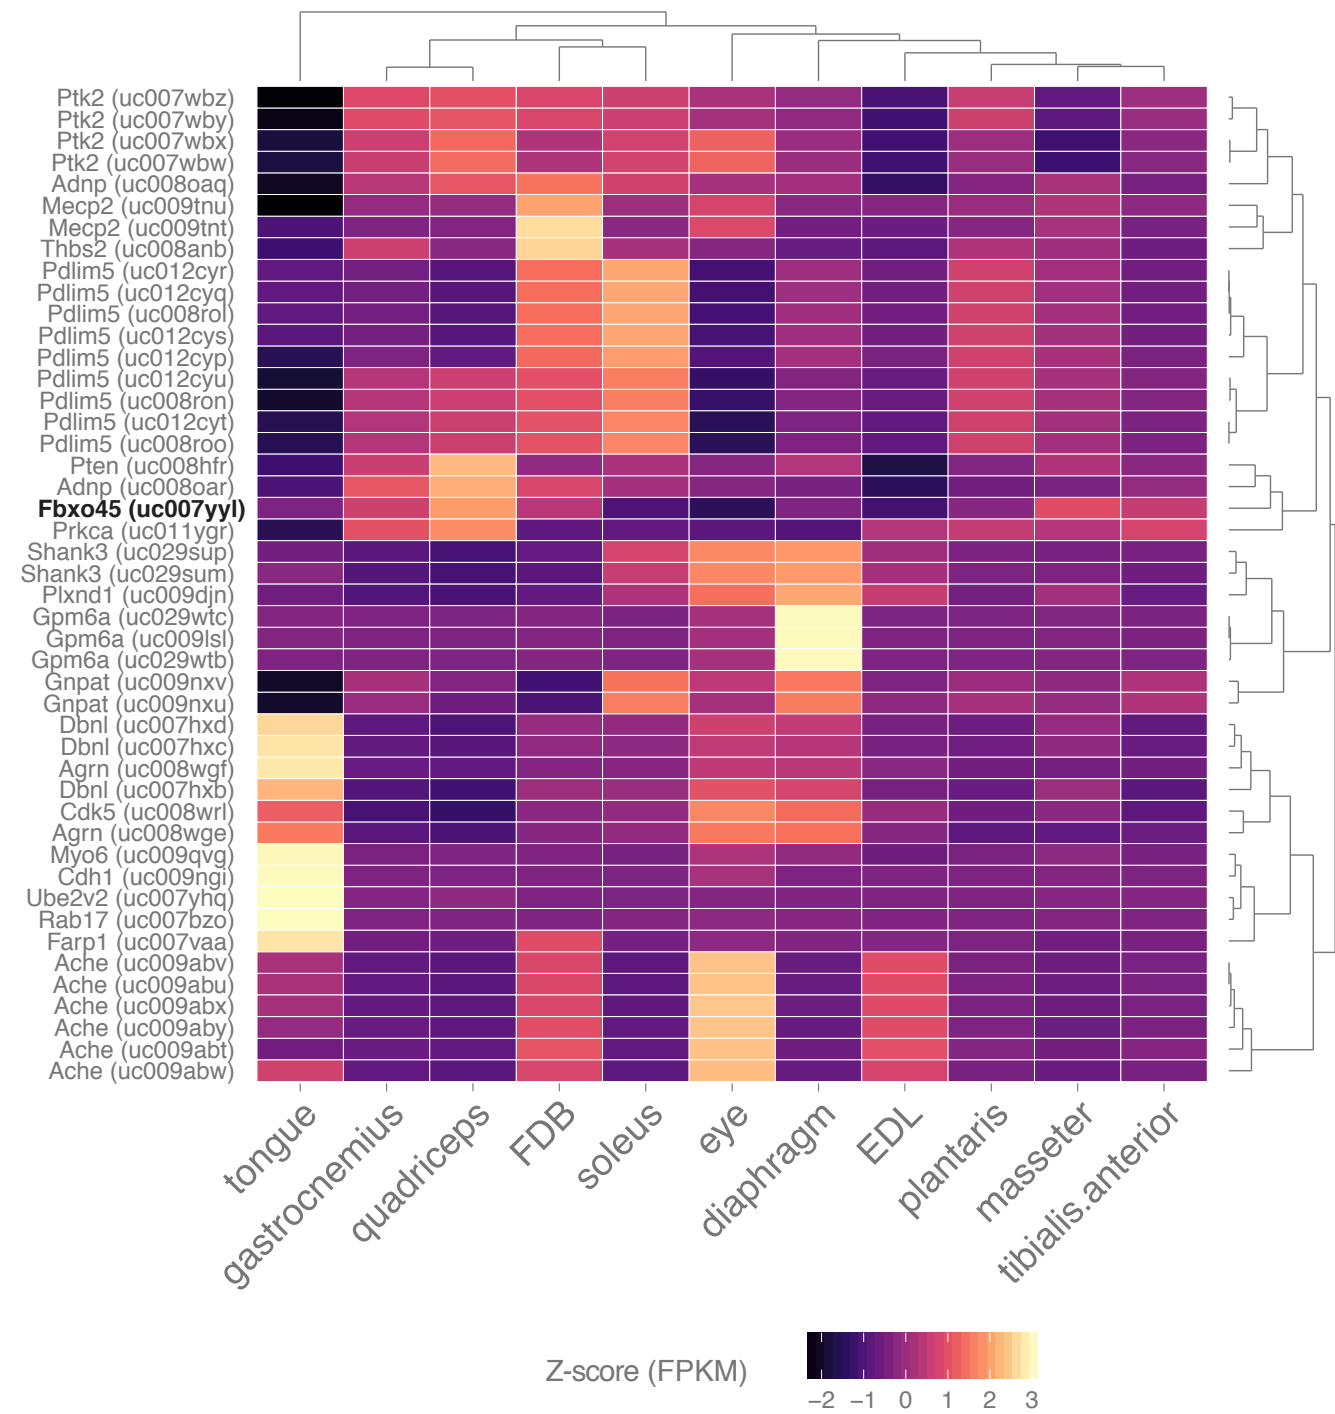

Supplement: supp [file elife-34613-supp-v1.zip]

Figure 2-figure supplement 2:

A

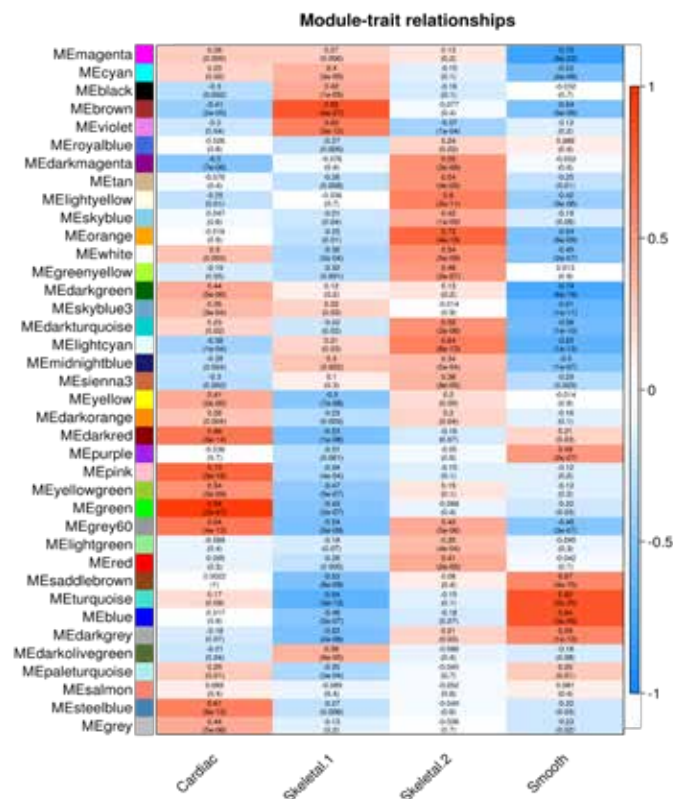

B

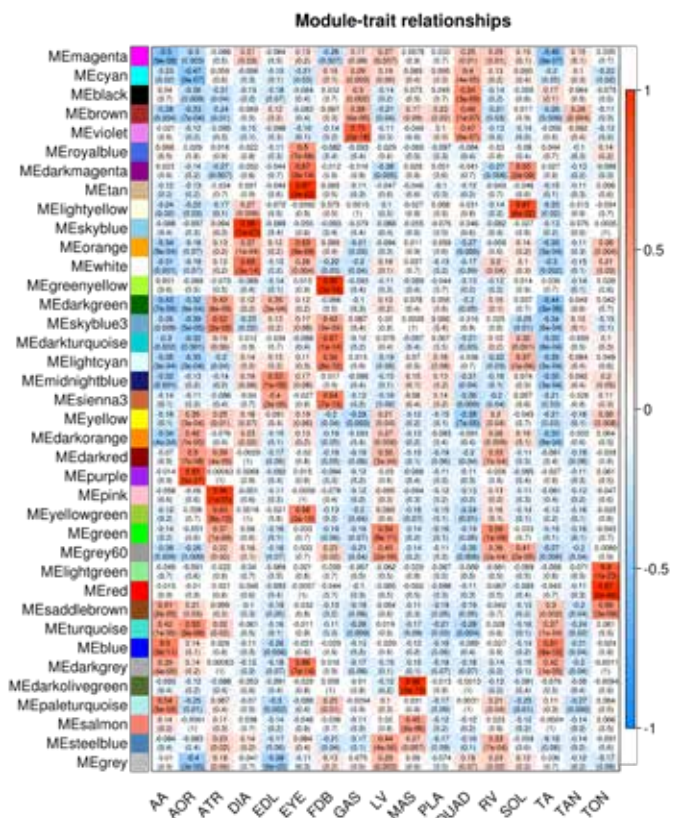

Supplement: supp [file elife-34613-supp-v1.zip]

Figure 1-figure supplement 2:

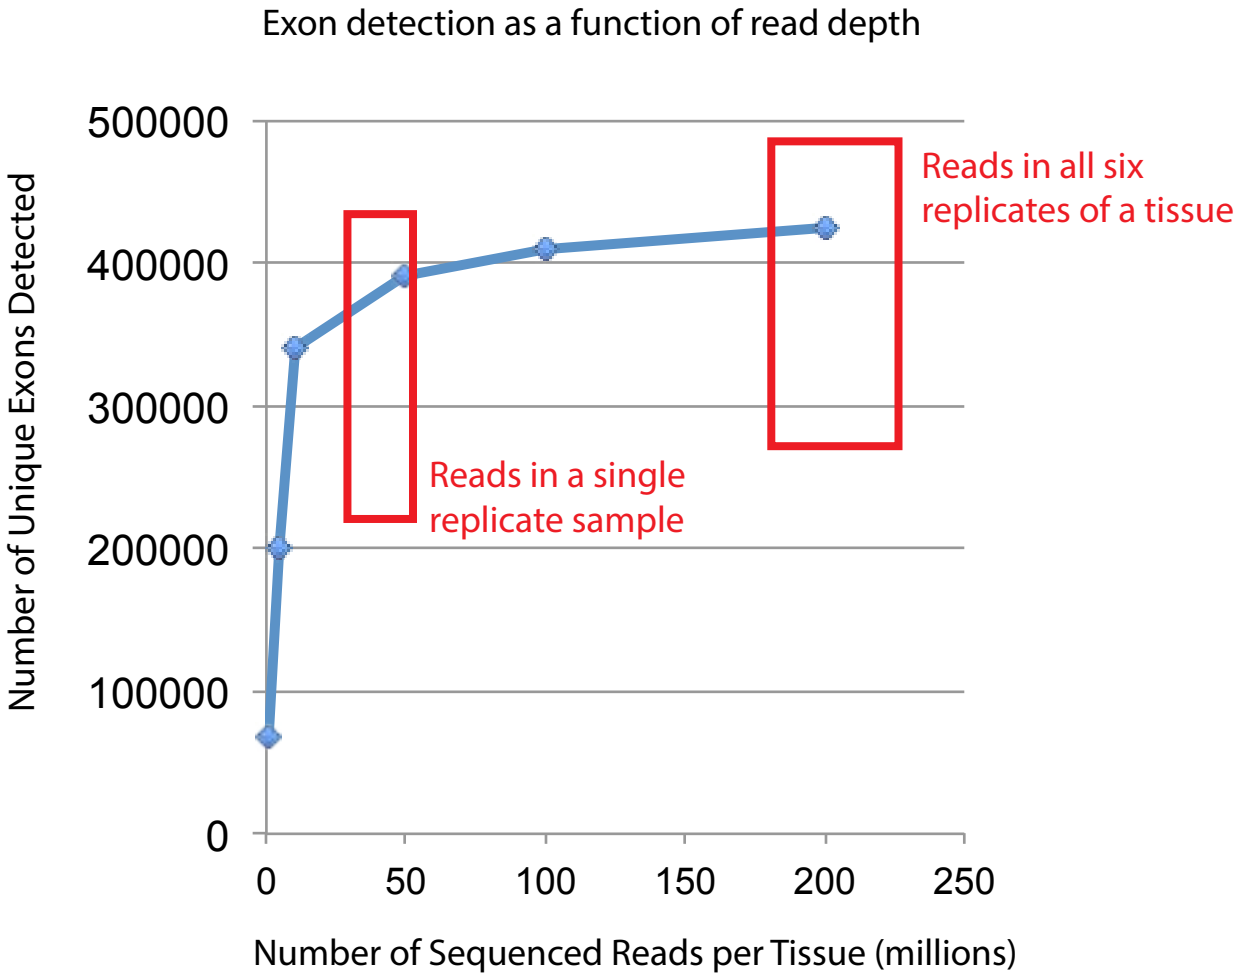

Supplement: supp [file elife-34613-supp-v1.zip › elife_poa_e34613_Figure_1_figure_supplement_2.pdf]

Figure 1-figure supplement 4:

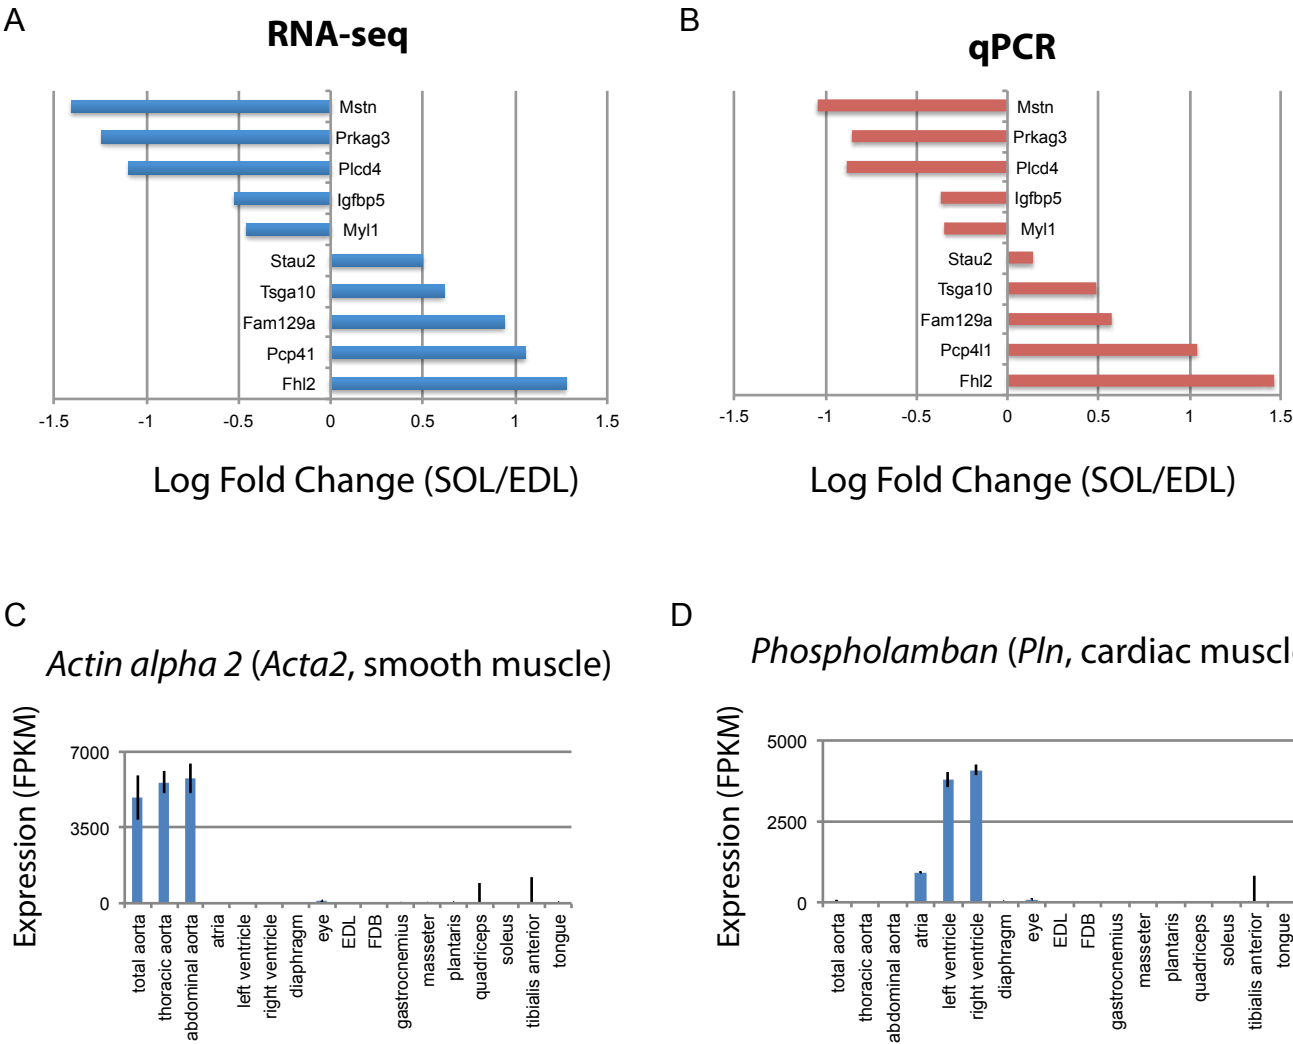

Supplement: supp [file elife-34613-supp-v1.zip › elife_poa_e34613_Figure_1_figure_supplement_4.pdf]

Figure 1-figure supplement 3:

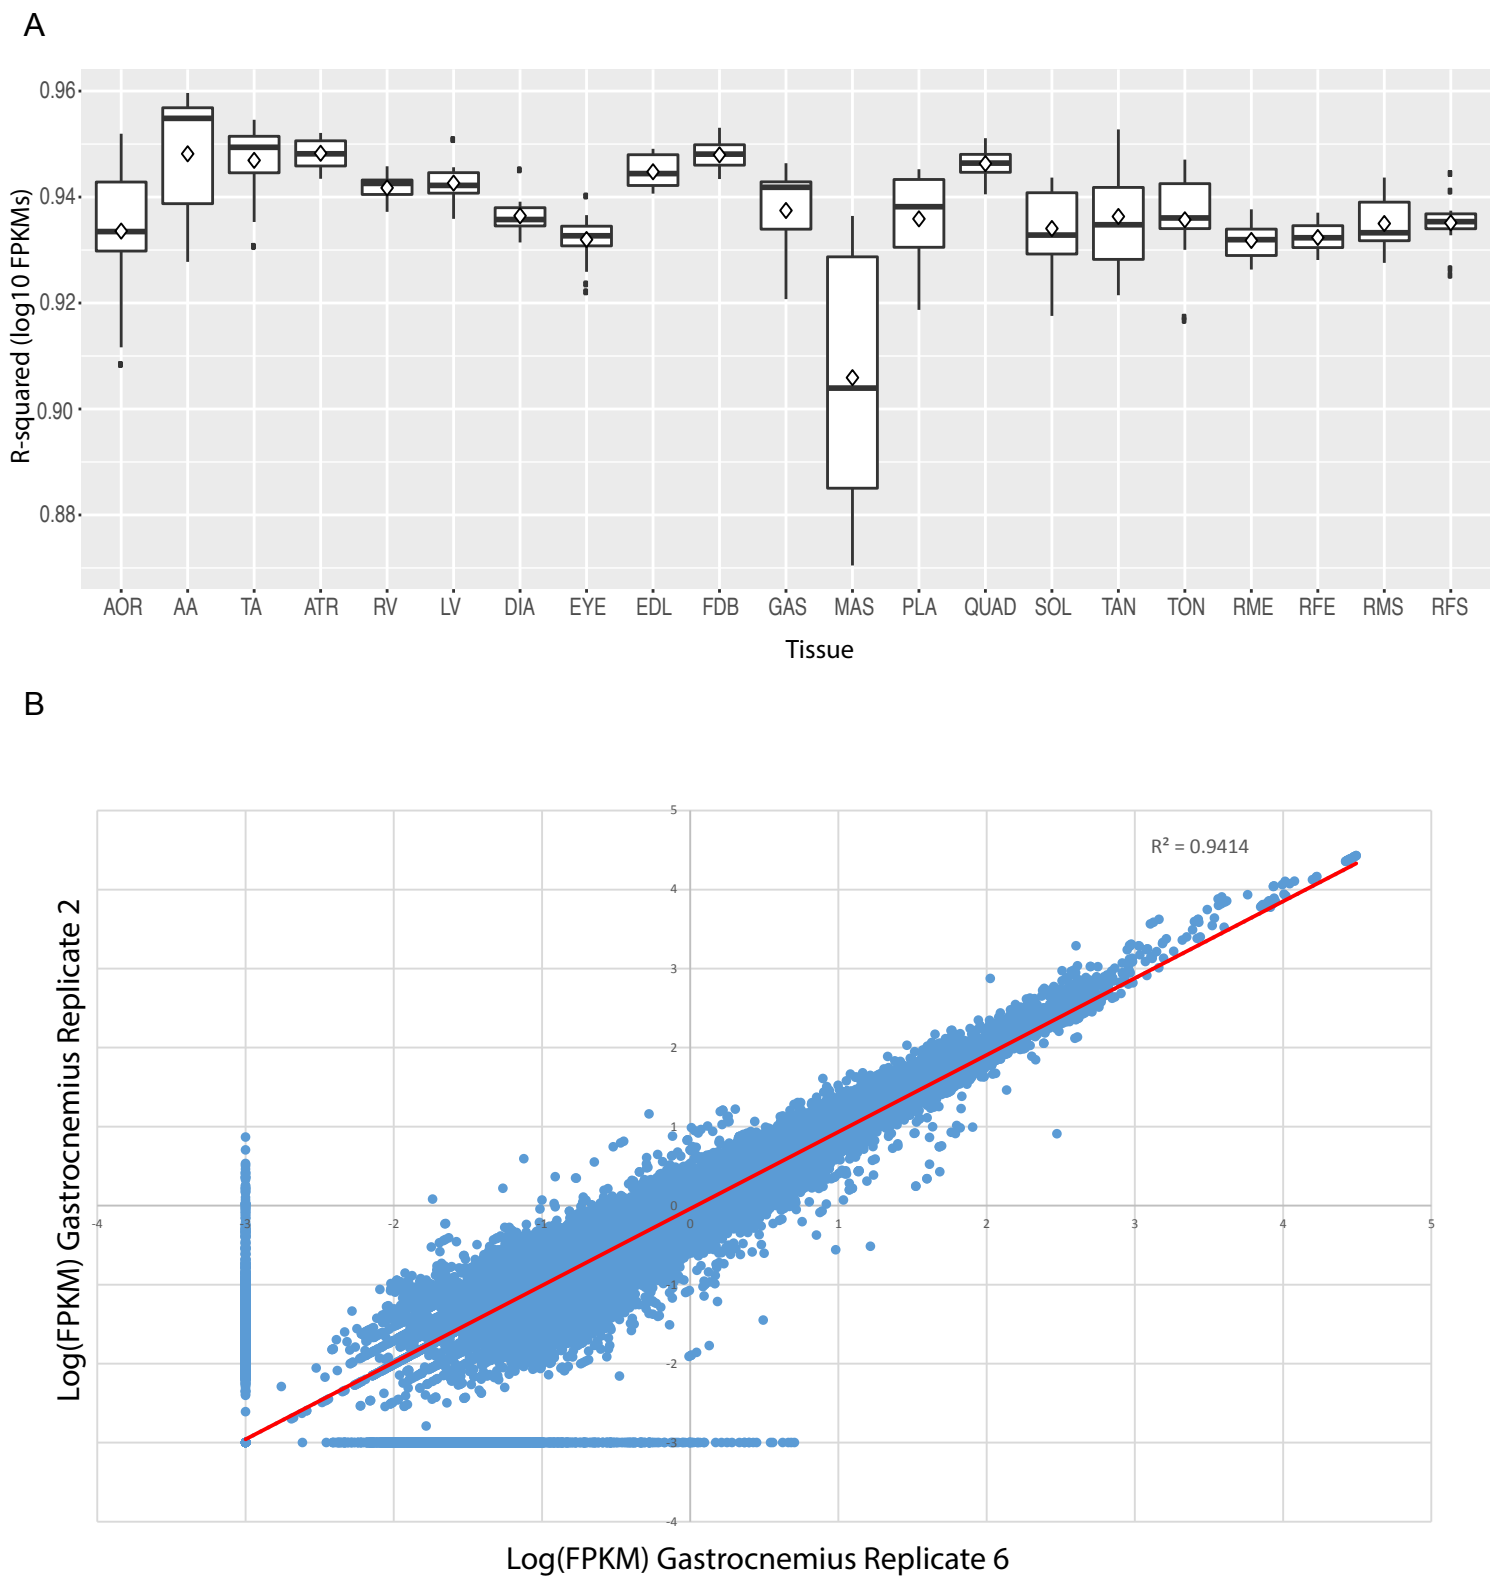

Supplement: supp [file elife-34613-supp-v1.zip › elife_poa_e34613_Figure_1_figure_supplement_3.pdf]

Figure 1-figure supplement 6:

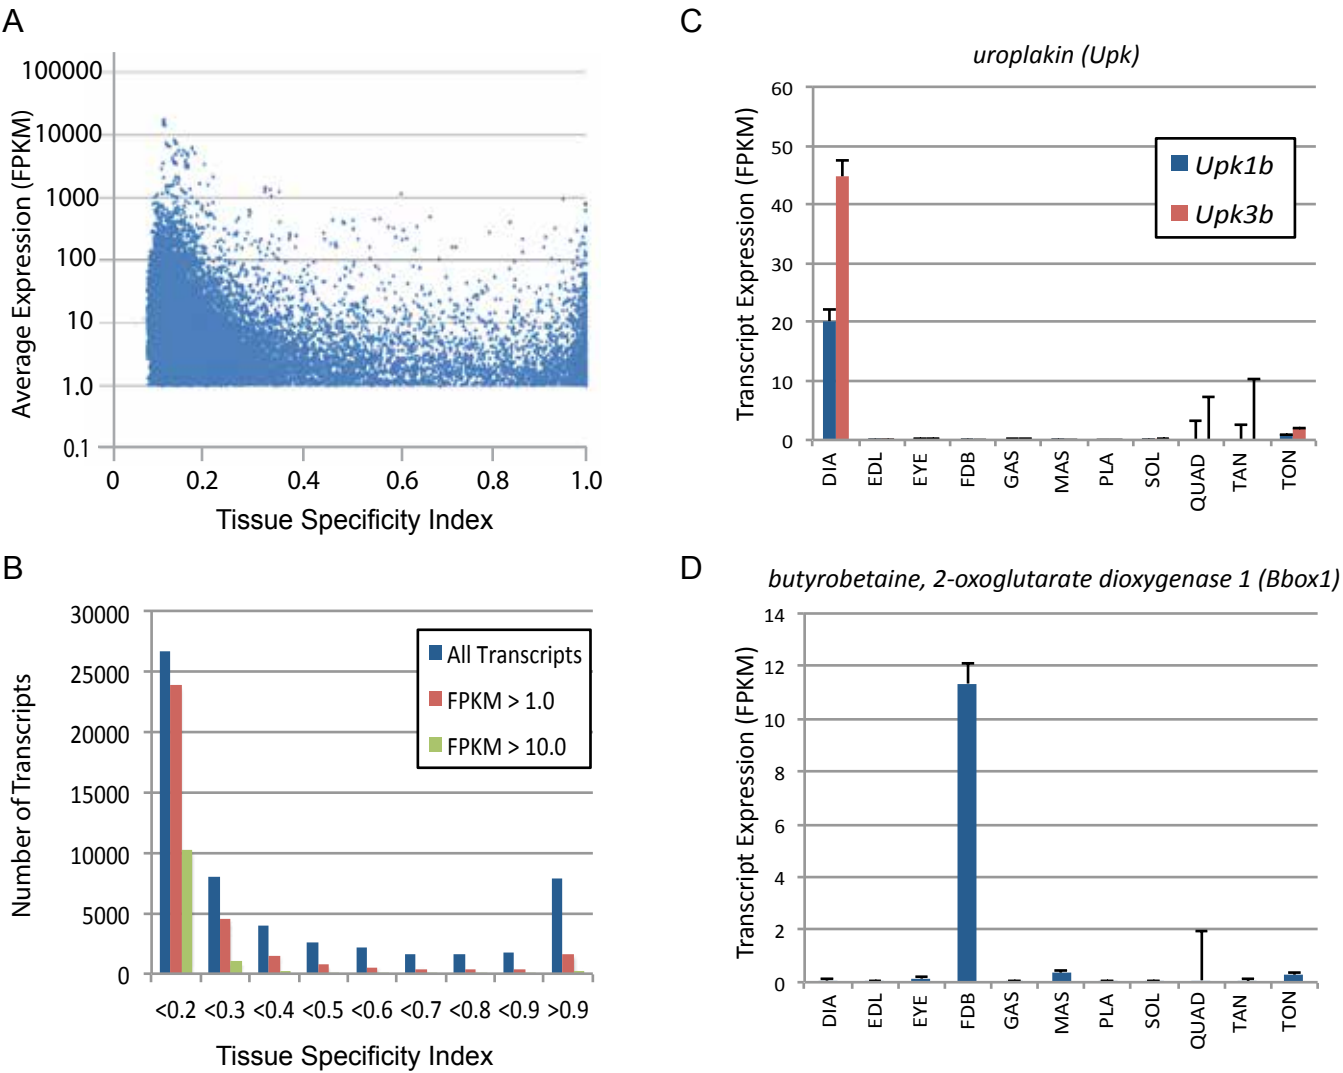

Supplement: supp [file elife-34613-supp-v1.zip › elife_poa_e34613_Figure_1_figure_supplement_6.pdf]

Figure 1-figure supplement 5:

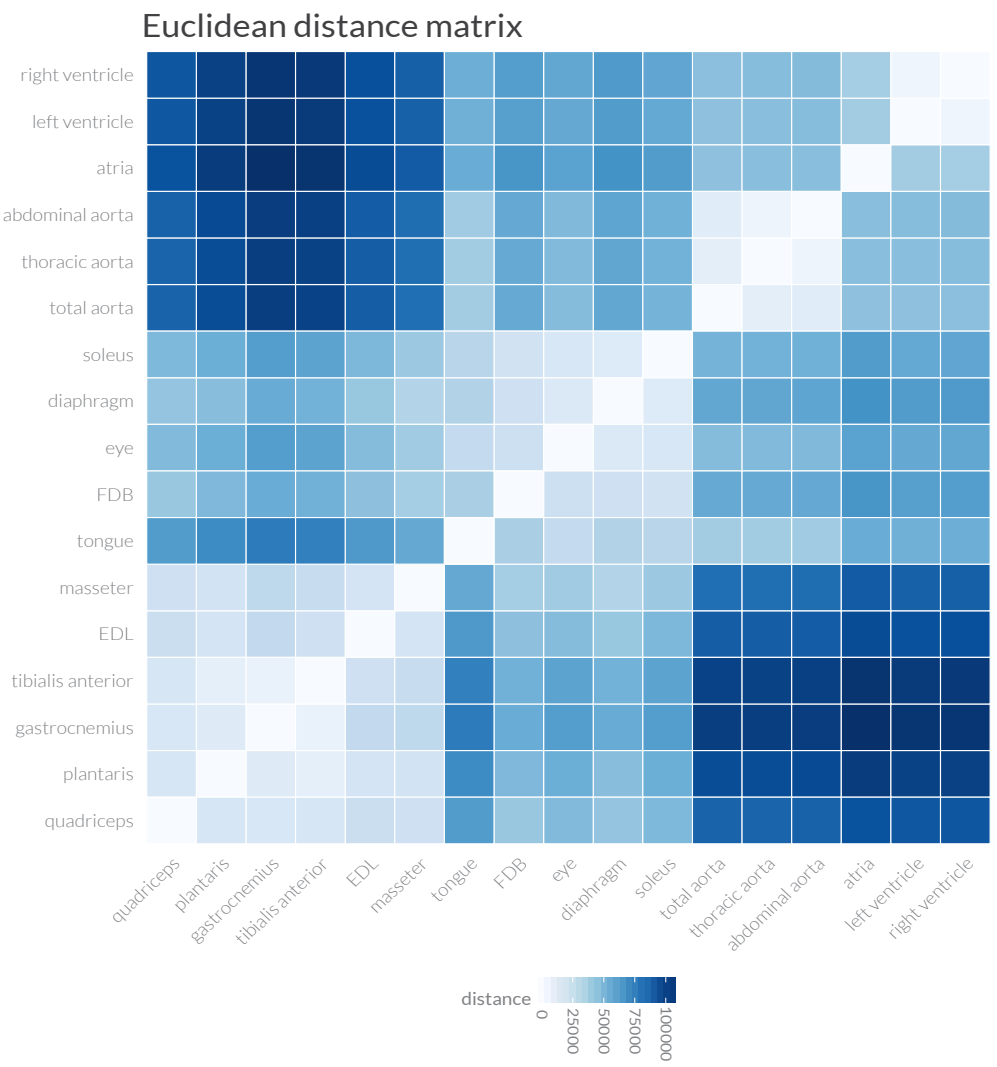

Supplement: supp [file elife-34613-supp-v1.zip › elife_poa_e34613_Figure_1_figure_supplement_5.pdf]

Figure 6-figure supplement 1:

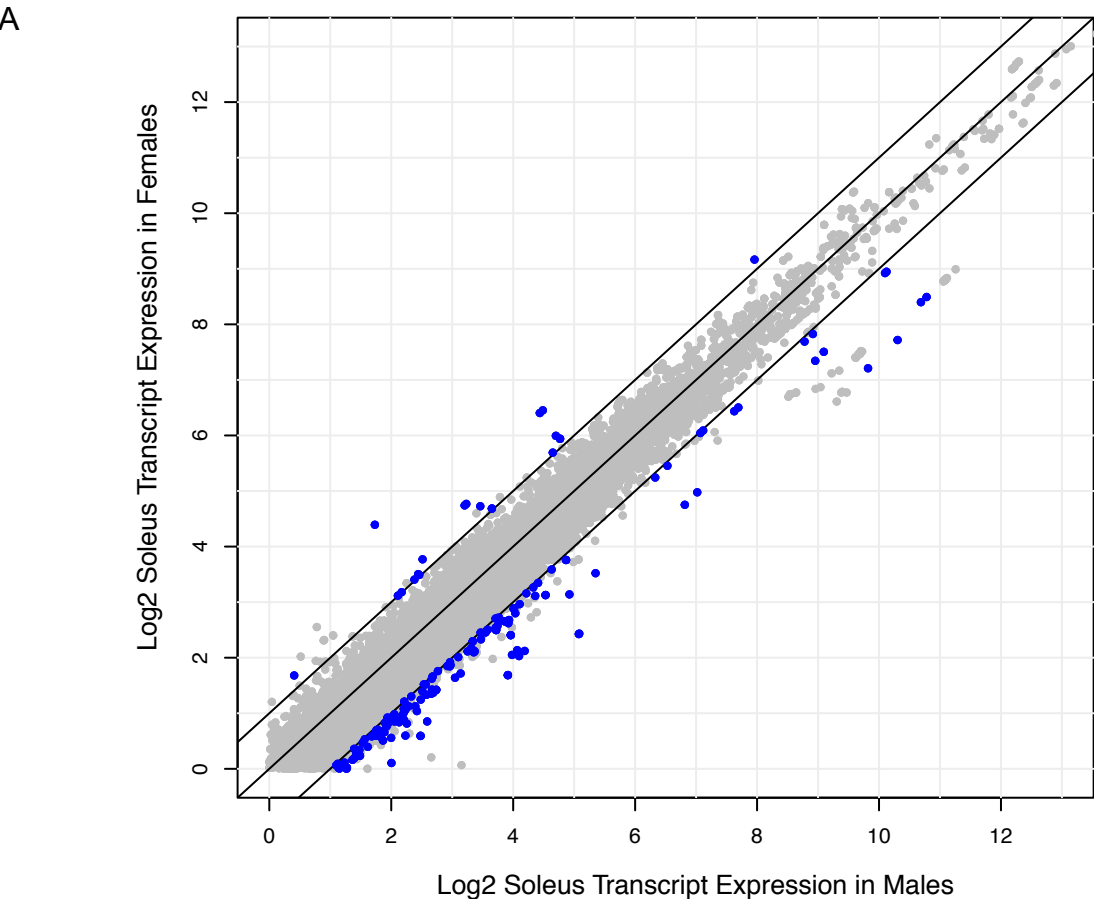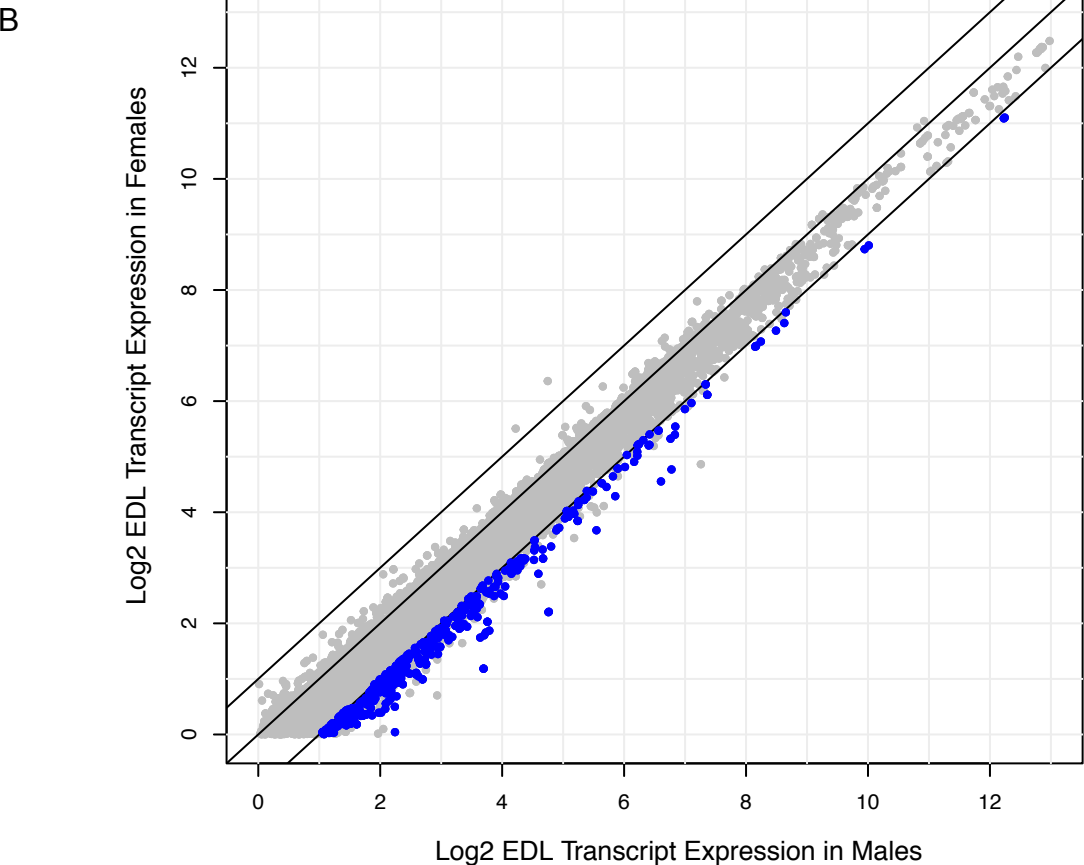

Supplement: supp [file elife-34613-supp-v1.zip › elife_poa_e34613_Figure_6_figure_supplement_1.pdf]

Figure 3-figure supplement 1:

A

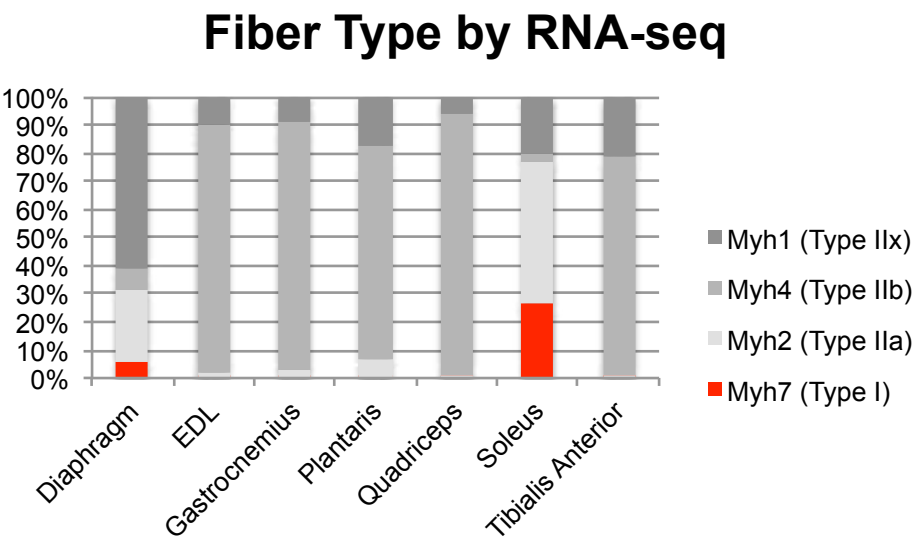

B

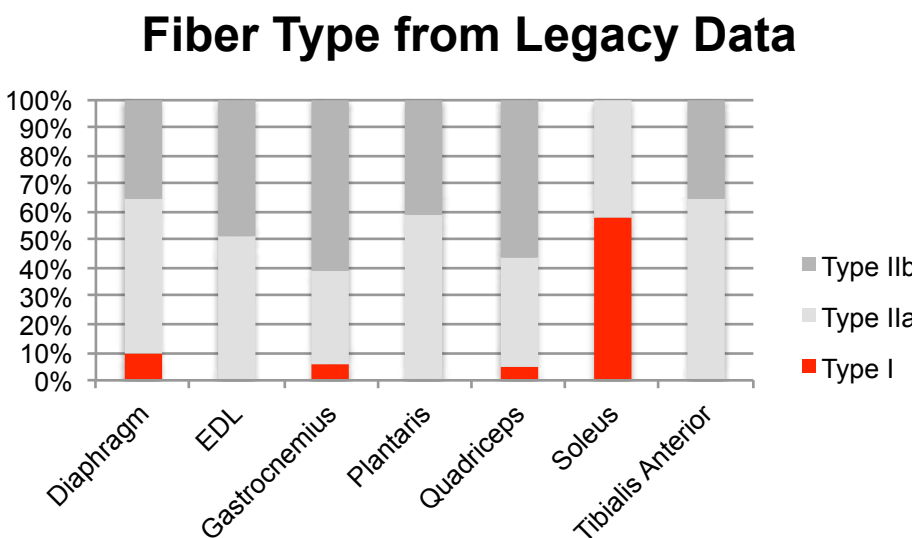

Supplement: supp [file elife-34613-supp-v1.zip › elife_poa_e34613_Figure_3_figure_supplement_1.pdf]

Figure 7-figure supplement 1:

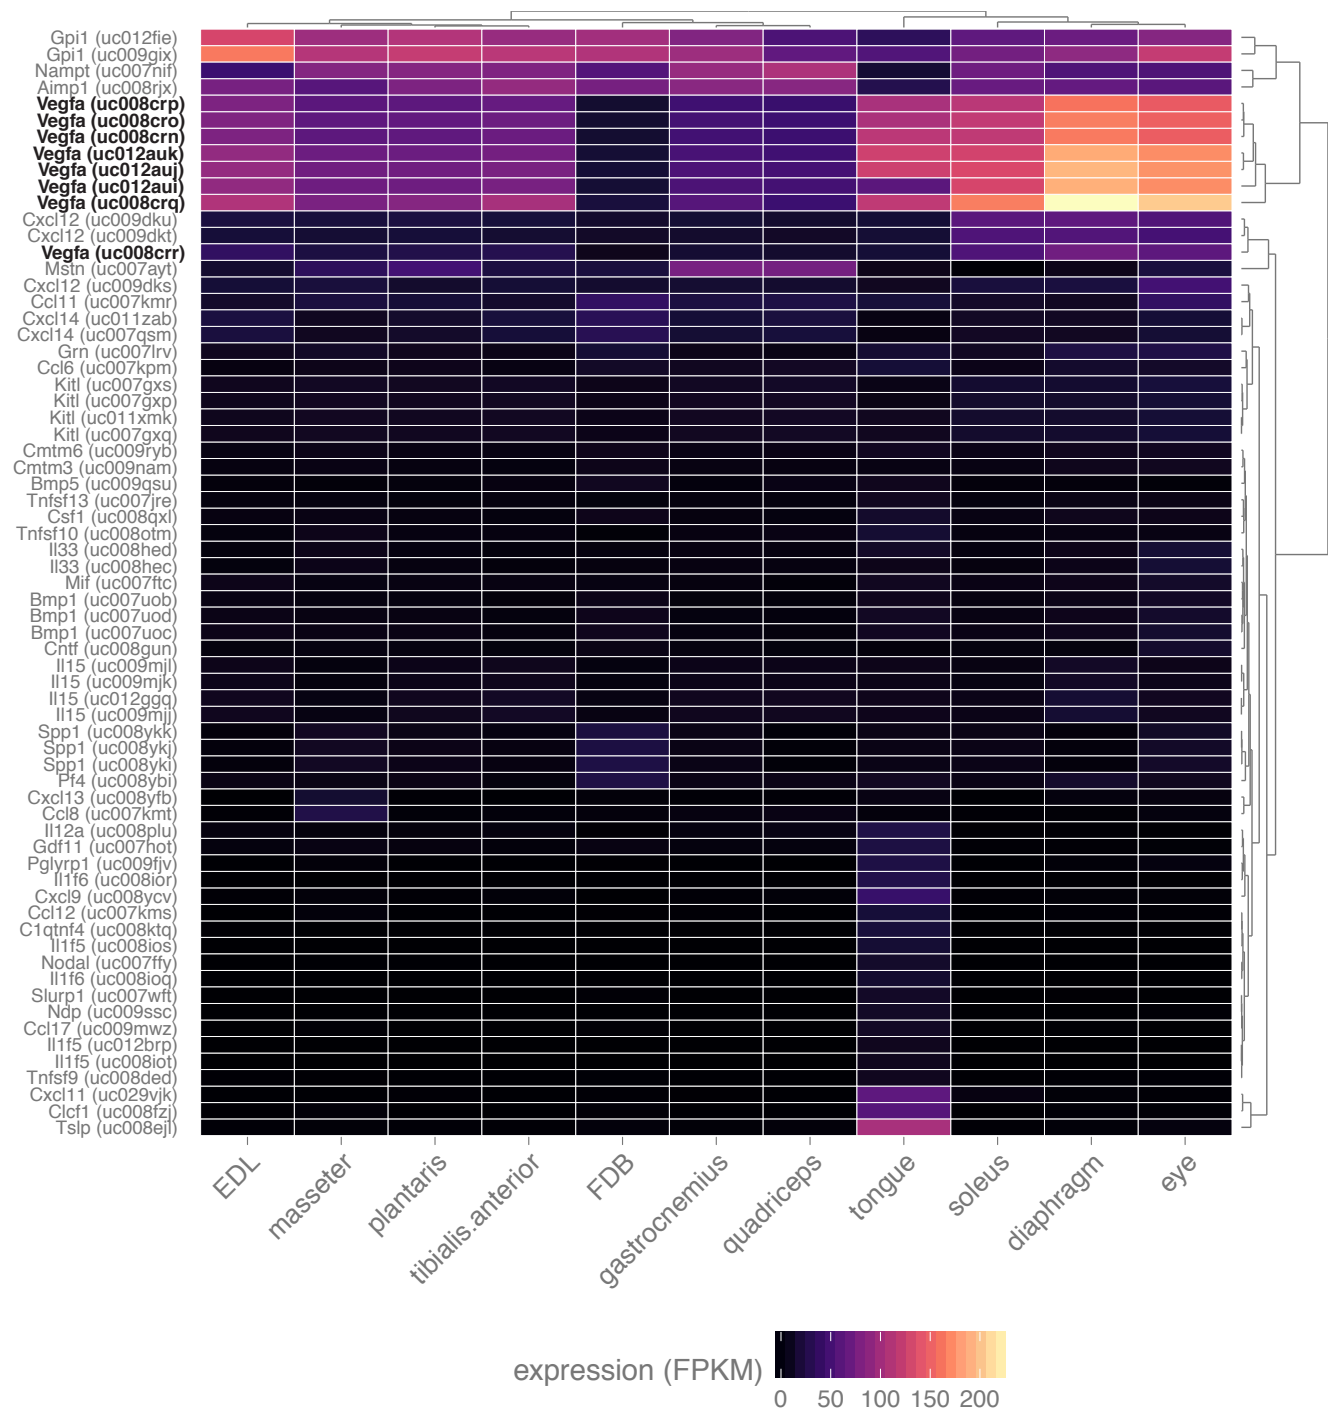

Supplement: supp [file elife-34613-supp-v1.zip › elife_poa_e34613_Figure_7_figure_supplement_1.pdf]
